# Supplementary material for: Overexpression of the ribosome-inactivating protein OsRIP1 modulates the jasmonate signaling pathway in rice
Source: Front Plant Sci. 2024 Aug 14;15:1385477. doi: 10.3389/fpls.2024.1385477 (PMC11349648; doi:10.3389/fpls.2024.1385477)
Supplement: Supplementary file 2 [file DataSheet2.xlsx]

## Sheet: S1 Identified proteins
Protein IDs	Majority protein IDs	Protein name	Gene name	LFQ intensity Ctrl 1	LFQ intensity Ctrl 2	LFQ intensity Ctrl 3	LFQ intensity OsRIP 1	LFQ intensity OsRIP 2	LFQ intensity OsRIP 3	Peptides	Razor + unique peptides	Unique peptides	Sequence coverage [%]	Unique + razor sequence coverage [%]	Unique sequence coverage [%]	Mol. weight [kDa]	Q-value	Score	Intensity	MS/MS count	Intensity Ctrl 1	Intensity Ctrl 2	Intensity Ctrl 3	Intensity OsRIP 1	Intensity OsRIP 2	Intensity OsRIP 3	iBAQ	iBAQ Ctrl 1	iBAQ Ctrl 2	iBAQ Ctrl 3	iBAQ OsRIP 1	iBAQ OsRIP 2	iBAQ OsRIP 3	MS/MS count Ctrl 1	MS/MS count Ctrl 2	MS/MS count Ctrl 3	MS/MS count OsRIP 1	MS/MS count OsRIP 2	MS/MS count OsRIP 3	Identification type Ctrl 1	Identification type Ctrl 2	Identification type Ctrl 3	Identification type OsRIP 1	Identification type OsRIP 2	Identification type OsRIP 3
Q0JMV6;Q42997;A0A0N7KCY0;A0A0P0VPW9	Q0JMV6;Q42997;A0A0N7KCY0	Os01g0357100 protein;Ferredoxin--nitrite reductase, chloroplastic	Os01g0357100;Os01g0357100	31229000	35640000	39477000	50947000	66895000	57273000	7	7	7	14.3	14.3	14.3	65.87	0	49.744	251710000	23	25476000	30914000	38191000	44762000	83615000	28753000	7627600	771990	936800	1157300	1356400	2533800	871310	2	1	3	4	8	5	By MS/MS	By MS/MS	By MS/MS	By MS/MS	By MS/MS	By MS/MS
A0A0N7KDI2;P0DKK2;P0DKK1	A0A0N7KDI2;P0DKK2;P0DKK1	Os01g0679700 protein (Fragment);60S ribosomal protein L37a-2	Os01g0679700;Os05g0557000	0	0	0	0	0	3185000	1	1	1	33.3	33.3	33.3	5.187	0.00084531	8.0725	27522000	6	3896200	2029000	3333600	10425000	6588700	1248800	13761000	1948100	1014500	1666800	5212700	3294400	624400	1	0	1	2	2	0	By MS/MS	By matching	By MS/MS	By MS/MS	By MS/MS	By matching
A0A0P0VC38;Q8S059;A0A0N7KEB1;Q40731	A0A0P0VC38;Q8S059;A0A0N7KEB1	Os01g0919900 protein (Fragment);Stearoyl-[acyl-carrier-protein] 9-desaturase 2, chloroplastic	Os01g0919900;SSI2	11398000	13532000	16134000	0	10805000	7772200	3	3	3	11.7	11.7	11.7	32.347	0	20.136	59772000	10	13839000	12886000	16858000	2920400	10891000	2377700	3516000	814040	757990	991640	171790	640670	139860	3	3	2	0	2	0	By MS/MS	By MS/MS	By MS/MS	By matching	By MS/MS	By matching
Q0E3F2;A0A0N7KET0	Q0E3F2;A0A0N7KET0	Os02g0177900 protein (Fragment);Os02g0177900 protein (Fragment)	Os02g0177900;Os02g0177900	17360000	19573000	15356000	0	12775000	17676000	4	4	4	15.9	15.9	15.9	37.652	0	30.48	73646000	10	23223000	22927000	13106000	900350	8312100	5176600	4332100	1366100	1348700	770970	52962	488950	304510	3	5	2	0	0	0	By MS/MS	By MS/MS	By MS/MS	By MS/MS	By MS/MS	By matching
Q5N8G6;A0A0N7KFI2	Q5N8G6;A0A0N7KFI2	Os01g0886600 protein;Os02g0564400 protein	Os01g0886600;Os02g0564400	0	0	0	0	6224500	0	2	2	2	5.2	5.2	5.2	53.856	0	12.055	32292000	2	3616400	6219500	5802900	6312700	8078500	2262400	1345500	150680	259150	241790	263030	336610	94265	0	0	0	1	1	0	By matching	By matching	By matching	By MS/MS	By MS/MS	By matching
B7EUQ4;A0A0N7KGC5;B7FA85	B7EUQ4;A0A0N7KGC5;B7FA85	Os02g0821800 protein;Os02g0821800 protein;Os05g0176000 protein	Os02g0821800;Os02g0821800;NA	0	0	0	2235900	0	0	1	1	1	4.4	4.4	4.4	23.675	0.0050505	6.1744	7049000	1	1526600	1191700	2113600	2217100	0	0	704900	152660	119170	211360	221710	0	0	0	0	1	0	0	0	By matching	By matching	By MS/MS	By matching
A0A0N7KGF7;Q0DVX8	A0A0N7KGF7;Q0DVX8	Os03g0107800 protein (Fragment);Os03g0107800 protein (Fragment)	Os03g0107800;Os03g0107800	7813400	7988200	12471000	0	0	5942500	2	2	2	41.7	41.7	41.7	7.1527	0	12.933	37727000	3	8643400	8226100	11488000	3133300	4324100	1912800	9431800	2160800	2056500	2871900	783320	1081000	478200	0	0	2	0	1	0	By matching	By matching	By MS/MS	By matching	By MS/MS	By matching
Q9AV77;A0A0N7KGJ7;A0A0P0VRI0	Q9AV77;A0A0N7KGJ7;A0A0P0VRI0	60S ribosomal protein L17;Os03g0139100 protein (Fragment)	OSJNBa0006L06.7;Os03g0139100	0	0	9354200	0	14610000	0	2	2	2	12.9	12.9	12.9	15.031	0.0008881	10.891	49726000	2	6428000	6207400	9986500	5061300	18927000	3115900	5525100	714230	689710	1109600	562370	2103000	346210	0	0	1	0	1	0	By matching	By matching	By MS/MS	By matching	By MS/MS	By matching
A0A0N7KGT3;Q10Q53	A0A0N7KGT3;Q10Q53	Os03g0209600 protein (Fragment);Methionyl-tRNA synthetase, putative, expressed	Os03g0209600;LOC_Os03g11120	0	0	0	0	10136000	0	2	2	2	6.8	6.8	6.8	40.852	0.0009009	11.101	32072000	0	5488800	5495600	4353000	3579200	13155000	0	1688000	288880	289240	229110	188380	692370	0	0	0	0	0	0	0	By matching	By matching	By matching	By MS/MS	By MS/MS
A0A0N7KH66;Q10M50;A0A0P0XAG6	A0A0N7KH66;Q10M50;A0A0P0XAG6	Os03g0323200 protein (Fragment);Magnesium-chelatase subunit ChlH, chloroplastic	Os03g0323200;CHLH	0	0	0	14178000	0	0	2	2	2	3.3	3.3	3.3	100.66	0	12.594	22904000	2	1805700	1373700	2206800	14059000	2839400	619790	487320	38418	29227	46953	299120	60412	13187	0	0	1	1	0	0	By matching	By matching	By MS/MS	By MS/MS	By matching	By matching
A0A0N7KHZ6;Q10DH8;Q851F6	A0A0N7KHZ6;Q10DH8;Q851F6	Os03g0729200 protein (Fragment);Expressed protein;Expressed protein	Os03g0729200;LOC_Os03g51950;NA	0	0	0	0	3367800	0	1	1	1	10.9	10.9	10.9	13.989	0.0016313	7.5417	11472000	3	0	3177700	2143100	1780000	4371000	0	1638800	0	453950	306160	254280	624430	0	0	2	1	0	0	0		By MS/MS	By MS/MS	By matching	By matching
Q84R32;A0A0N7KI05	Q84R32;A0A0N7KI05	CBS domain containing protein, expressed;Os03g0737000 protein (Fragment)	OSJNBb0016H12.19;Os03g0737000	88690000	74259000	77449000	80118000	58002000	52245000	4	4	4	33.2	33.2	33.2	22.307	0	45.547	404320000	34	72670000	59296000	91250000	74086000	82391000	24626000	36756000	6606300	5390600	8295500	6735100	7490100	2238700	7	6	7	6	6	2	By MS/MS	By MS/MS	By MS/MS	By MS/MS	By MS/MS	By MS/MS
A0A0N7KIR1;Q0JEI2;A0A0P0W8Q9	A0A0N7KIR1;Q0JEI2	Os04g0270100 protein (Fragment);Os04g0270100 protein (Fragment)	Os04g0270100;Os04g0270100	64452000	71980000	86969000	62902000	53186000	62931000	7	7	7	21.2	21.2	21.2	51.186	0	68.408	368470000	34	75213000	66021000	92712000	49370000	59252000	25906000	16749000	3418800	3000900	4214200	2244100	2693300	1177600	9	9	8	5	2	1	By MS/MS	By MS/MS	By MS/MS	By MS/MS	By MS/MS	By MS/MS
A0A0N7KJF4	A0A0N7KJF4	Os04g0538166 protein (Fragment)	Os04g0538166	37534000	34625000	29913000	44849000	45262000	0	3	3	3	37.6	37.6	37.6	16.141	0	26.364	207160000	17	45281000	34353000	37376000	37533000	42299000	10318000	29594000	6468800	4907600	5339400	5361800	6042700	1474100	5	4	3	1	3	1	By MS/MS	By MS/MS	By MS/MS	By MS/MS	By MS/MS	By MS/MS
A0A0N7KJP5;Q7XN11;Q6ZH29;Q7XN12;Q6ZCF0	A0A0N7KJP5;Q7XN11	Os04g0614600 protein (Fragment);Gamma-aminobutyrate transaminase 1, mitochondrial	Os04g0614600;OSL2	87597000	67427000	65817000	0	43032000	54689000	7	7	7	34	34	34	42.004	0	58.694	293540000	34	99204000	68921000	89119000	7019900	12355000	16924000	15450000	5221300	3627400	4690500	369470	650280	890720	14	8	8	2	1	1	By MS/MS	By MS/MS	By MS/MS	By MS/MS	By MS/MS	By MS/MS
A0A0N7KJT1;Q7X8Z8	A0A0N7KJT1;Q7X8Z8	Glutamyl-tRNA(Gln) amidotransferase subunit A, chloroplastic/mitochondrial;Glutamyl-tRNA(Gln) amidotransferase subunit A, chloroplastic/mitochondrial	GATA;NA	10584000	12225000	17468000	13449000	26081000	15029000	4	4	4	13.5	13.5	13.5	56.374	0	39.752	89844000	8	13280000	12631000	18804000	7037900	31213000	6878100	3593800	531210	505240	752160	281520	1248500	275120	2	1	2	0	2	1	By MS/MS	By MS/MS	By MS/MS	By matching	By MS/MS	By MS/MS
A0A0N7KJV4	A0A0N7KJV4	Os04g0661900 protein	Os04g0661900	0	0	0	0	0	20608000	2	2	2	18.8	18.8	18.8	19.263	0	12.041	71870000	5	14091000	13145000	16049000	8340300	12164000	8080300	7187000	1409100	1314500	1604900	834030	1216400	808030	1	1	1	1	1	0	By MS/MS	By MS/MS	By MS/MS	By MS/MS	By MS/MS	By matching
A0A0N7KJX8;A3AYP1	A0A0N7KJX8;A3AYP1	Os04g0679400 protein;Os04g0679400 protein	Os04g0679400;Os04g0679400	0	0	0	0	0	3628000	1	1	1	5.8	5.8	5.8	16.686	0.0050651	6.1924	17723000	2	3008400	2671700	4345600	0	6274800	1422500	1476900	250700	222640	362130	0	522900	118540	0	0	1	0	1	0	By matching	By matching	By MS/MS		By MS/MS	By matching
A0A0N7KK97;Q9LST8	A0A0N7KK97;Q9LST8	Os05g0187000 protein (Fragment);Proteasome subunit beta	Os05g0187000;OsPBB1	0	0	0	0	0	11574000	1	1	1	6	6	6	21.514	0.00085763	8.3554	49437000	3	4510400	5070700	4603300	12783000	17931000	4538200	8239600	751740	845110	767210	2130600	2988600	756360	1	1	1	0	0	0	By MS/MS	By MS/MS	By MS/MS	By MS/MS	By matching	By MS/MS
A0A0N7KKX5;A0A0P0WNI6	A0A0N7KKX5;A0A0P0WNI6	Os05g0463600 protein (Fragment);Os05g0463600 protein (Fragment)	Os05g0463600;Os05g0463600	8880400	9037600	6909400	3048700	2543800	2827200	3	3	3	13.5	13.5	13.5	49.462	0	18.772	31109000	7	8867500	7507600	7230500	3012900	3337600	1153000	1555500	443380	375380	361530	150650	166880	57651	2	2	3	0	0	0	By MS/MS	By MS/MS	By MS/MS	By matching	By matching	By matching
A0A0N7KLE5;Q9LI00	A0A0N7KLE5;Q9LI00	6-phosphogluconate dehydrogenase, decarboxylating (Fragment);6-phosphogluconate dehydrogenase, decarboxylating 1	Os06g0111500;G6P	4210700	0	0	0	0	0	1	1	1	3.3	3.3	3.3	46.376	0.005694	6.0884	4210700	1	4210700	0	0	0	0	0	191400	191400	0	0	0	0	0	1	0	0	0	0	0	By MS/MS
A0A0N7KLH2	A0A0N7KLH2	3-phosphoshikimate 1-carboxyvinyltransferase (Fragment)	Os06g0133900	0	0	0	0	0	11933000	2	2	2	8.1	8.1	8.1	34.709	0	14.091	41894000	7	6904200	4941400	8517200	7315000	9537700	4678800	3222600	531090	380110	655170	562690	733670	359900	1	1	1	1	2	1	By MS/MS	By MS/MS	By MS/MS	By MS/MS	By MS/MS	By MS/MS
A0A0N7KLZ4	A0A0N7KLZ4	Os06g0301300 protein (Fragment)	Os06g0301300	0	0	0	0	5444600	0	2	2	2	3.9	3.9	3.9	77.002	0.00088339	10.798	9057100	1	0	0	0	1990700	7066400	0	323470	0	0	0	71096	252370	0	0	0	0	0	1	0				By matching	By MS/MS
A0A0P0VFX2;A0A0N7KMH6;A0A0P0VQV1;Q75U53;Q8H616;Q75M03;Q94CP2;Q67WN5	A0A0P0VFX2;A0A0N7KMH6;A0A0P0VQV1;Q75U53;Q8H616;Q75M03;Q94CP2;Q67WN5	Os02g0184200 protein (Fragment);Os06g0644200 protein (Fragment)	Os02g0184200;Os06g0644200	0	0	0	0	0	1645800	1	1	1	5.1	5.1	5.1	32.275	0.0076072	5.9499	11094000	1	2016400	1949400	2431000	1454000	2597500	645290	924460	168030	162450	202580	121160	216460	53774	0	0	0	0	1	0	By matching	By matching	By matching	By matching	By MS/MS	By matching
A0A0N7KMZ4	A0A0N7KMZ4	Os07g0163800 protein (Fragment)	Os07g0163800	39798000	39750000	45241000	40292000	31520000	47951000	8	8	6	29.3	29.3	22.4	34.645	0	58.267	226740000	18	32567000	15102000	40374000	48635000	69027000	21035000	11337000	1628400	755120	2018700	2431800	3451400	1051800	4	3	5	2	3	1	By MS/MS	By MS/MS	By MS/MS	By MS/MS	By MS/MS	By MS/MS
A0A0N7KNC0	A0A0N7KNC0	Os07g0421866 protein	Os07g0421866	28221000	22766000	10300000	0	30325000	0	3	3	3	15.5	15.5	15.5	34.62	0	19.015	108360000	7	20439000	24115000	19401000	6586000	31048000	6768700	6772300	1277400	1507200	1212500	411620	1940500	423040	1	2	2	0	1	1	By MS/MS	By MS/MS	By MS/MS	By matching	By MS/MS	By MS/MS
A0A0N7KNW9	A0A0N7KNW9	Os07g0632800 protein (Fragment)	Os07g0632800	118260000	109330000	120630000	100490000	104250000	112340000	13	13	13	32.9	32.9	32.9	45.058	0	89.683	632450000	70	129040000	103060000	146740000	62201000	155340000	36067000	21082000	4301300	3435500	4891300	2073400	5178000	1202200	16	13	23	6	8	4	By MS/MS	By MS/MS	By MS/MS	By MS/MS	By MS/MS	By MS/MS
A0A0N7KQF3;Q6K3Z3	A0A0N7KQF3;Q6K3Z3	Os09g0252100 protein (Fragment);Os09g0252100 protein	Os09g0252100;Os09g0252100	11711000	11355000	8255400	0	16454000	0	3	3	3	14.7	14.7	14.7	39.774	0	21.665	64619000	6	12127000	11641000	9692400	5653600	20060000	5445000	3230900	606340	582050	484620	282680	1003000	272250	2	1	1	1	1	0	By MS/MS	By MS/MS	By MS/MS	By MS/MS	By MS/MS	By matching
A0A0N7KRS7;Q338C0	A0A0N7KRS7;Q338C0	Os10g0415800 protein (Fragment);Acylamino-acid-releasing enzyme 2	Os10g0415800;Os10g0415800	0	0	0	0	7128000	0	2	2	2	7.8	7.8	7.8	38.512	0	12.749	23207000	2	4956500	3967700	5031800	0	9251200	0	1289300	275360	220430	279550	0	513960	0	1	1	0	0	0	0	By MS/MS	By MS/MS	By matching		By matching
Q6AV34;A0A0N7KS03	Q6AV34;A0A0N7KS03	Probable N-acetyl-gamma-glutamyl-phosphate reductase, chloroplastic;Os10g0494200 protein	Os03g0617900;Os10g0494200	14914000	17475000	18040000	0	13941000	14847000	3	3	3	9.4	9.4	9.4	44.786	0	18.683	79466000	7	14515000	12590000	16566000	0	32197000	3599300	3178600	580580	503580	662620	0	1287900	143970	1	2	3	0	1	0	By MS/MS	By MS/MS	By MS/MS		By MS/MS	By matching
A0A0P0XZP4;A0A0N7KSJ8;Q53NI2	A0A0P0XZP4;A0A0N7KSJ8;Q53NI2	Os11g0191400 protein (Fragment);Os11g0191400 protein (Fragment)	Os11g0191400;Os11g0191400	9126000	11317000	12664000	9959400	11462000	0	2	2	2	8.1	8.1	8.1	41.273	0	12.43	58923000	4	8828000	9010300	15623000	7980000	15744000	1736900	3101200	464630	474230	822280	420000	828640	91418	2	1	1	0	0	0	By MS/MS	By MS/MS	By MS/MS	By matching	By matching	By matching
A0A0N7KSP9	A0A0N7KSP9	Os11g0247300 protein (Fragment)	Os11g0247300	0	0	0	0	0	8729600	2	1	1	51.2	32.6	32.6	4.7497	0.00082169	7.6983	56228000	8	14119000	11752000	15698000	5912900	5323500	3422800	18743000	4706500	3917200	5232500	1971000	1774500	1140900	2	2	1	1	1	1	By MS/MS	By MS/MS	By MS/MS	By MS/MS	By MS/MS	By MS/MS
A0A0N7KTS9;Q2QVC1;A0A0P0Y1E8;A0A0P0Y908	A0A0N7KTS9;Q2QVC1	Os12g0235800 protein (Fragment);Argininosuccinate synthase, chloroplast, putative, expressed	Os12g0235800;LOC_Os12g13320	95625000	99678000	120390000	77290000	89855000	112810000	11	11	11	41.4	41.4	41.4	38.877	0	69.947	564960000	48	102360000	85736000	134310000	69883000	132470000	40195000	23540000	4265100	3572300	5596100	2911800	5519700	1674800	10	9	11	6	7	5	By MS/MS	By MS/MS	By MS/MS	By MS/MS	By MS/MS	By MS/MS
A0A0P0UX97	A0A0P0UX97	Os01g0120300 protein (Fragment)	Os01g0120300	46082000	56876000	56599000	65087000	55642000	63851000	12	12	12	20.3	20.3	20.3	89.938	0	95.288	323170000	36	59620000	69232000	84561000	41651000	52781000	15322000	9233300	1703400	1978100	2416000	1190000	1508000	437780	7	9	10	3	5	2	By MS/MS	By MS/MS	By MS/MS	By MS/MS	By MS/MS	By MS/MS
A0A0P0UZH3;Q43007;A0A0P0UYT9;A0A0P0UZ65	A0A0P0UZH3;Q43007;A0A0P0UYT9	Os01g0172400 protein (Fragment);Phospholipase D alpha 1	Os01g0172400;PLD1	192410000	203380000	219850000	202650000	214340000	285380000	21	21	18	38.7	38.7	33.9	85.198	0	166.14	1224000000	93	199290000	178740000	291520000	147310000	312570000	94563000	27818000	4529200	4062300	6625400	3348100	7103900	2149100	18	18	21	12	17	7	By MS/MS	By MS/MS	By MS/MS	By MS/MS	By MS/MS	By MS/MS
A0A0P0V0B3;Q9AWZ8	A0A0P0V0B3;Q9AWZ8	Os01g0225400 protein (Fragment);3-methyl-2-oxobutanoate hydroxymethyltransferase 1, mitochondrial	Os01g0225400;KPHMT1	0	0	7288200	0	0	0	2	2	2	24.6	24.6	24.6	14.456	0.00088183	10.657	24625000	1	8773700	7538200	7758700	0	0	554070	4924900	1754700	1507600	1551700	0	0	110810	0	0	1	0	0	0	By MS/MS	By matching	By MS/MS			By matching
A0A0P0V0K9	A0A0P0V0K9	Os01g0260500 protein (Fragment)	Os01g0260500	0	0	0	0	0	18024000	1	1	1	1.4	1.4	1.4	86.509	0.0096022	5.9143	27018000	3	0	0	0	9476600	10474000	7067000	658970	0	0	0	231140	255470	172360	0	0	0	1	1	1				By MS/MS	By MS/MS	By MS/MS
A0A0P0V0Y5;Q5NBP9;A0A0P0V1M1	A0A0P0V0Y5;Q5NBP9	Os01g0276800 protein (Fragment);Glucosidase 2 subunit beta	Os01g0276800;Os01g0276800	27632000	30319000	37971000	20725000	19495000	14761000	5	5	5	20.9	20.9	20.9	40.926	0	33.224	142350000	16	28754000	27284000	43119000	17533000	19288000	6375200	11863000	2396100	2273700	3593200	1461100	1607300	531270	3	2	5	3	3	0	By MS/MS	By MS/MS	By MS/MS	By MS/MS	By MS/MS	By matching
A0A0P0V179;Q0JNR2	A0A0P0V179;Q0JNR2	Cysteine proteinase inhibitor (Fragment);Cysteine proteinase inhibitor 12	Os01g0270100;Os01g0270100	0	0	0	0	7981300	0	1	1	1	8.1	8.1	8.1	26.981	0.0056101	6.0154	29405000	1	4237300	4243300	10566000	0	10359000	0	2940500	423730	424330	1056600	0	1035900	0	0	1	0	0	0	0	By matching	By MS/MS	By matching		By matching
A0A0P0V197	A0A0P0V197	Os01g0260700 protein	Os01g0260700	11832000	12090000	0	0	0	0	4	4	4	16.6	16.6	16.6	33.32	0	23.403	52603000	4	11910000	9978500	13618000	2053300	15042000	0	3287700	744400	623660	851140	128330	940130	0	1	1	0	0	2	0	By MS/MS	By MS/MS	By matching	By matching	By MS/MS
A0A0P0V1W0;Q5ZA22	A0A0P0V1W0;Q5ZA22	Os01g0332100 protein (Fragment);Os01g0332100 protein	Os01g0332100;B1140D12.1-1	0	0	3124700	0	0	0	1	1	1	3.8	3.8	3.8	33.304	0.0043541	6.2419	10161000	2	3818200	3016600	3326500	0	0	0	597720	224600	177450	195670	0	0	0	1	0	1	0	0	0	By MS/MS	By matching	By MS/MS
A0A0P0V6Q2;Q0JKB4	A0A0P0V6Q2;Q0JKB4	ATP synthase subunit beta (Fragment);ATP synthase subunit beta	Os01g0685800;Os01g0685800	18398000	18964000	18726000	71931000	32992000	21499000	19	2	2	59	6.9	6.9	53.049	0	16.419	168510000	11	25264000	22407000	23926000	55534000	30190000	11189000	6481100	971680	861790	920210	2135900	1161200	430330	2	2	2	2	2	1	By MS/MS	By MS/MS	By MS/MS	By MS/MS	By MS/MS	By MS/MS
A0A0P0V707	A0A0P0V707	Os01g0698900 protein	Os01g0698900	9017000	0	0	0	0	0	1	1	1	3.7	3.7	3.7	41.203	0.0069252	5.956	9017000	1	9017000	0	0	0	0	0	563560	563560	0	0	0	0	0	1	0	0	0	0	0	By MS/MS
A0A0P0V7M3;Q0JJQ7;A0A0P0V7L8;Q0DYW1;A3A9W6	A0A0P0V7M3;Q0JJQ7;A0A0P0V7L8	Malic enzyme (Fragment);Malic enzyme (Fragment);Malic enzyme (Fragment)	Os01g0723400;Os01g0723400;NA	163900000	176550000	176790000	149140000	179920000	227820000	12	12	10	31.2	31.2	27.4	61.267	0	115.3	1006500000	66	167180000	156440000	184920000	116870000	293350000	87709000	32467000	5393000	5046500	5965200	3769900	9463100	2829300	17	16	14	6	9	4	By MS/MS	By MS/MS	By MS/MS	By MS/MS	By MS/MS	By MS/MS
A0A0P0W501;A0A0P0V883;Q852B4;Q941S7;Q6K2P6;Q6AUF8;P40393;Q75M17;Q75II9;Q94J09;Q75LE2	A0A0P0W501;A0A0P0V883;Q852B4;Q941S7;Q6K2P6;Q6AUF8;P40393;Q75M17;Q75II9;Q94J09;Q75LE2	Os03g0823700 protein;Os01g0750000 protein;Os03g0823700 protein	Os03g0823700;Os01g0750000;NA	0	0	0	0	0	0	1	1	1	11.1	11.1	11.1	10.014	0.006263	5.9781	0	1	0	0	0	0	0	0	0	0	0	0	0	0	0	0	0	0	1	0	0				By MS/MS
A0A0P0V8R4	A0A0P0V8R4	Os01g0771400 protein	Os01g0771400	0	0	0	10101000	0	0	2	1	1	1.8	1	1	119.35	0.002259	6.6292	30995000	3	7175400	7442500	6360900	10016000	0	0	619900	143510	148850	127220	200320	0	0	1	1	0	1	0	0	By MS/MS	By MS/MS	By matching	By MS/MS
A0A0P0V9M1	A0A0P0V9M1	Os01g0816600 protein (Fragment)	Os01g0816600	0	0	0	0	0	19665000	1	1	1	1.7	1.7	1.7	101.97	0.0056259	6.024	49657000	3	16242000	10931000	14773000	0	0	7710300	1379300	451150	303650	410370	0	0	214180	2	0	1	0	0	0	By MS/MS	By matching	By MS/MS			By matching
A0A0P0WG60;Q8S919;Q7XR79;Q69JN7;A0A0P0V9Q4	A0A0P0WG60;Q8S919;Q7XR79;Q69JN7;A0A0P0V9Q4	Os04g0667800 protein (Fragment);Ubiquitin-conjugating enzyme E2 5B	Os04g0667800;UBC5B	0	0	0	0	0	24230000	1	1	1	15.3	15.3	15.3	8.2085	0.0022556	6.6034	96013000	7	16134000	12452000	15037000	20328000	22561000	9500100	48006000	8067200	6226000	7518500	10164000	11281000	4750100	2	1	2	1	0	1	By MS/MS	By MS/MS	By MS/MS	By MS/MS	By matching	By MS/MS
A0A0P0VAP1;Q94CW5	A0A0P0VAP1;Q94CW5	Os01g0862200 protein;Os01g0862200 protein	Os01g0862200;P0423B08.8-1	0	0	11623000	0	0	0	2	2	2	23.7	23.7	23.7	10.474	0	15.769	50934000	6	10084000	10101000	12373000	6257100	9763600	2355000	8488900	1680700	1683400	2062200	1042900	1627300	392500	1	2	2	0	1	0	By MS/MS	By MS/MS	By MS/MS	By matching	By MS/MS	By matching
A0A0P0VAU9;Q8S1N3	A0A0P0VAU9;Q8S1N3	Os01g0868900 protein (Fragment);Os01g0868900 protein	Os01g0868900;Os01g0868900	0	0	3469800	0	0	0	1	1	1	2.5	2.5	2.5	54.88	0.0082474	5.935	11503000	2	4159000	3650600	3693900	0	0	0	718960	259930	228160	230870	0	0	0	1	0	1	0	0	0	By MS/MS	By matching	By MS/MS
A0A0P0VB60	A0A0P0VB60	Os01g0880700 protein	Os01g0880700	0	0	0	0	0	11571000	1	1	1	5.8	5.8	5.8	12.598	0.003663	6.2777	38634000	4	0	0	0	20396000	13702000	4536700	9658600	0	0	0	5098900	3425500	1134200	0	0	0	2	1	1				By MS/MS	By MS/MS	By MS/MS
A0A0P0VBL9	A0A0P0VBL9	Os01g0899425 protein (Fragment)	Os01g0899425	0	0	0	0	0	1563700000	5	1	1	50.9	17.9	17.9	11.793	0	41.676	5138400000	67	419230000	594180000	1122800000	711550000	1605500000	685180000	642300000	52404000	74273000	140350000	88944000	200690000	85648000	9	11	15	8	15	9	By MS/MS	By MS/MS	By MS/MS	By MS/MS	By MS/MS	By MS/MS
A0A0P0VBP1	A0A0P0VBP1	Os01g0895600 protein	Os01g0895600	15446000	0	14536000	20996000	25801000	19175000	4	3	2	14.1	11.6	8.8	36.922	0	18.465	96919000	9	13674000	10482000	11275000	19942000	30553000	10993000	4615200	651170	499150	536890	949630	1454900	523460	0	1	2	2	3	1	By MS/MS	By MS/MS	By MS/MS	By MS/MS	By MS/MS	By MS/MS
A0A0P0VBX1	A0A0P0VBX1	Os01g0901500 protein	Os01g0901500	0	0	2957100	0	0	0	1	1	1	3.4	3.4	3.4	46.022	0.0055944	5.9982	8708100	1	3049200	2510800	3148000	0	0	0	414670	145200	119560	149900	0	0	0	1	0	0	0	0	0	By MS/MS	By matching	By matching
A0A0P0VD48;Q5JMR9	A0A0P0VD48;Q5JMR9	Os01g0963400 protein (Fragment);Thioredoxin Y, chloroplastic	Os01g0963400;Os01g0963400	14447000	11390000	14538000	0	19292000	0	2	2	2	16.4	16.4	16.4	13.733	0	12.451	68032000	8	12434000	8527400	8370300	646060	37774000	280050	13606000	2486900	1705500	1674100	129210	7554900	56009	2	2	2	0	2	0	By MS/MS	By MS/MS	By MS/MS	By matching	By MS/MS	By matching
A0A0P0VDY9;A0A0P0VDW7	A0A0P0VDY9	Os02g0115700 protein (Fragment)	Os02g0115700	0	0	0	0	0	2939200	9	1	1	51.8	4.1	4.1	25.684	0.0022676	6.669	49581000	7	15674000	13830000	11464000	7460800	0	1152400	4507400	1424900	1257300	1042200	678250	0	104770	2	2	2	1	0	0	By MS/MS	By MS/MS	By MS/MS	By MS/MS	By matching	By matching
A0A0P0VEA4	A0A0P0VEA4	Os02g0131100 protein (Fragment)	Os02g0131100	5035500	5164400	7878700	3399400	3047100	3327000	3	2	2	11.3	6.6	6.6	54.42	0.00090827	11.311	26087000	4	6413900	5604100	6935100	2975700	3050100	1108400	1134200	278870	243660	301530	129380	132610	48193	1	1	2	0	0	0	By MS/MS	By MS/MS	By MS/MS	By matching	By matching	By matching
A0A0P0VEB3	A0A0P0VEB3	Os02g0131700 protein	Os02g0131700	0	0	17797000	50629000	56755000	37958000	4	4	4	13.6	13.6	13.6	49.261	0	31.826	183830000	7	15920000	12301000	13939000	62710000	64370000	14590000	11489000	994990	768780	871210	3919400	4023100	911850	1	1	2	1	2	0	By MS/MS	By MS/MS	By MS/MS	By MS/MS	By MS/MS	By matching
A0A0P0VED8	A0A0P0VED8	Os02g0131100 protein (Fragment)	Os02g0131100	12603000	26597000	25593000	16029000	0	11731000	4	4	3	13.6	13.6	9.6	65.254	0	27.564	92210000	5	9486700	24579000	31260000	14126000	8888300	3870000	2974500	306020	792870	1008400	455670	286720	124840	1	1	3	0	0	0	By MS/MS	By MS/MS	By MS/MS	By matching	By matching	By matching
A0A0P0VEH6;Q6Z2L5	A0A0P0VEH6;Q6Z2L5	Os02g0127700 protein;Ribose-phosphate pyrophosphokinase 1, chloroplastic	Os02g0127700;Os02g0127700	0	0	0	0	0	7637200	1	1	1	6.1	6.1	6.1	21.396	0.00084746	8.1138	25573000	3	6723100	5788600	4822800	0	5244100	2994500	2841400	747010	643180	535870	0	582670	332720	1	1	1	0	0	0	By MS/MS	By MS/MS	By MS/MS		By matching	By matching
A0A0P0VEN2	A0A0P0VEN2	Os02g0137400 protein (Fragment)	Os02g0137400	35370000	37746000	36232000	32646000	28745000	36649000	5	5	5	8	8	8	95.599	0	59.947	199600000	23	30955000	27767000	40248000	26885000	59947000	13803000	5394700	836610	750450	1087800	726610	1620200	373050	4	4	5	3	5	2	By MS/MS	By MS/MS	By MS/MS	By MS/MS	By MS/MS	By MS/MS
A0A0P0VEX6;Q0E3Z8	A0A0P0VEX6;Q0E3Z8	Os02g0146400 protein (Fragment);Os02g0146400 protein (Fragment)	Os02g0146400;Os02g0146400	0	0	0	0	0	3484000	1	1	1	5.8	5.8	5.8	22.919	0.0076125	5.95	8696700	0	2217000	1995900	3117700	0	0	1366000	1087100	277130	249490	389710	0	0	170750	0	0	0	0	0	0	By MS/MS	By MS/MS	By MS/MS			By matching
A0A0P0VFD2;Q6H6B9	A0A0P0VFD2;Q6H6B9	Inositol-1-monophosphatase (Fragment);Inositol-1-monophosphatase	Os02g0169900;Os02g0169900	95191000	85441000	75278000	52949000	90307000	83205000	7	7	7	33.8	33.8	33.8	38.551	0	75.461	448970000	39	91153000	78143000	91848000	47248000	106780000	33793000	24943000	5064100	4341300	5102700	2624900	5932300	1877400	8	9	11	2	7	2	By MS/MS	By MS/MS	By MS/MS	By MS/MS	By MS/MS	By MS/MS
Q6ETN3;A0A0P0VFD3	Q6ETN3;A0A0P0VFD3	Probable 4-coumarate--CoA ligase 3;Os02g0177600 protein (Fragment)	4CL3;Os02g0177600	0	2138500	0	0	0	0	2	2	2	5.2	5.2	5.2	59.64	0	13.897	17173000	2	1612100	1776600	810800	0	12974000	0	553980	52004	57311	26155	0	418510	0	1	0	0	0	1	0	By MS/MS	By matching	By matching		By MS/MS
A0A0P0VFX8;Q6H7M1	A0A0P0VFX8;Q6H7M1	Fumarylacetoacetase (Fragment);Fumarylacetoacetase	Os02g0196800;FAH	0	0	3225900	0	0	0	1	1	1	5.2	5.2	5.2	33.726	0.0015873	7.1753	11365000	1	4731500	3199800	3434200	0	0	0	598180	249020	168410	180750	0	0	0	0	0	1	0	0	0	By matching	By matching	By MS/MS
A0A0P0VGY4;Q6EUD5	A0A0P0VGY4;Q6EUD5	Os02g0245000 protein (Fragment);Os02g0245000 protein	Os02g0245000;Os02g0245000	11989000	11969000	12683000	0	7019200	0	5	5	5	8.7	8.7	8.7	81.022	0	29.82	45804000	8	12883000	10859000	12196000	1754700	8111000	0	1431400	402610	339350	381110	54834	253470	0	2	1	3	0	2	0	By MS/MS	By MS/MS	By MS/MS	By matching	By MS/MS
Q6K8B8;A0A0P0VHP9	Q6K8B8;A0A0P0VHP9	40S ribosomal protein S3a;Os02g0287000 protein (Fragment)	Os02g0287000;Os02g0287000	0	0	0	11551000	0	0	5	2	1	24.1	8.4	5.4	29.759	0.0022762	6.7	29097000	1	3607300	2325400	5049800	11454000	5747500	912400	1939800	240490	155030	336650	763630	383170	60827	0	0	0	1	0	0	By matching	By matching	By matching	By MS/MS	By matching	By matching
A0A0P0VHS8;Q6K714	A0A0P0VHS8;Q6K714	Os02g0289500 protein (Fragment);Os02g0820400 protein	Os02g0289500;Os02g0820400	0	0	0	0	0	1496100	1	1	1	11.6	11.6	11.6	10.667	0.0015492	6.899	17873000	2	2978100	2430600	4881300	3309100	3687700	586590	2978900	496350	405100	813550	551520	614620	97765	0	0	0	1	1	0	By matching	By matching	By matching	By MS/MS	By MS/MS	By matching
A0A0P0VHT5;A0A0P0VHT6	A0A0P0VHT5;A0A0P0VHT6	Os02g0290600 protein (Fragment);Os02g0290600 protein (Fragment)	Os02g0290600;Os02g0290600	229360000	218560000	224260000	148430000	218360000	200510000	14	14	14	31	31	31	76.072	0	126.59	1226200000	73	256340000	178480000	231660000	161510000	311460000	86711000	38317000	8010700	5577400	7239500	5047000	9733000	2709700	17	15	15	9	10	7	By MS/MS	By MS/MS	By MS/MS	By MS/MS	By MS/MS	By MS/MS
A0A0P0VIA6;Q6Z875	A0A0P0VIA6;Q6Z875	Os02g0325100 protein (Fragment);Os02g0325100 protein	Os02g0325100;Os02g0325100	19530000	23101000	23557000	18764000	17918000	14295000	6	5	5	21.6	18.2	18.2	39.372	0	33.481	113520000	14	15771000	14285000	19630000	33557000	25447000	4827600	5675900	788570	714230	981500	1677900	1272400	241380	3	3	2	3	3	0	By MS/MS	By MS/MS	By MS/MS	By MS/MS	By MS/MS	By matching
A0A0P0VJQ7;Q6H798	A0A0P0VJQ7;Q6H798	Os02g0525900 protein (Fragment);Acetyl-coenzyme A synthetase	Os02g0525900;Os02g0525900	0	0	0	0	0	2993700	5	1	1	12.8	3.3	3.3	50.263	0.0029851	6.469	16867000	0	3096500	2151500	2812900	4069500	3563300	1173800	648750	119090	82749	108190	156520	137050	45145	0	0	0	0	0	0	By MS/MS	By matching	By matching	By matching	By matching	By matching
A0A0P0VLH5	A0A0P0VLH5	Os02g0608550 protein	Os02g0608550	0	0	0	0	7254700	0	2	2	1	15.4	15.4	7.1	16.042	0	15.857	46149000	5	7174900	5775800	9082400	12121000	9415700	2578800	5127600	797210	641750	1009200	1346800	1046200	286540	1	1	1	1	1	0	By MS/MS	By MS/MS	By MS/MS	By MS/MS	By MS/MS	By matching
A0A0P0VLJ4	A0A0P0VLJ4	GrpE protein homolog (Fragment)	Os02g0612000	15141000	16832000	14153000	0	12155000	0	3	3	3	11.5	11.5	11.5	32.741	0	30.01	74233000	4	14600000	14531000	10432000	10356000	21273000	3039900	4948800	973330	968740	695450	690420	1418200	202660	1	1	0	0	2	0	By MS/MS	By MS/MS	By matching	By matching	By MS/MS	By matching
A0A0P0VLT9;Q0DZE5	A0A0P0VLT9;Q0DZE5	Os02g0625500 protein (Fragment);Os02g0625500 protein (Fragment)	Os02g0625500;Os02g0625500	164390000	202390000	163520000	123850000	96650000	126450000	9	9	9	37.5	37.5	37.5	35.394	0	95.458	825100000	43	154830000	150080000	161040000	187030000	132690000	39435000	45839000	8601700	8337900	8946800	10390000	7371500	2190800	9	9	12	4	7	2	By MS/MS	By MS/MS	By MS/MS	By MS/MS	By MS/MS	By MS/MS
A0A0P0VMS9	A0A0P0VMS9	Os02g0664100 protein	Os02g0664100	15232000	14682000	14535000	11677000	16538000	12754000	4	4	4	13.2	13.2	13.2	59.714	0	22.753	81132000	7	14203000	15132000	18020000	5383000	23468000	4925800	3380500	591780	630490	750850	224290	977850	205240	1	2	2	0	2	0	By MS/MS	By MS/MS	By MS/MS	By matching	By MS/MS	By matching
A0A0P0VNU6	A0A0P0VNU6	Os02g0712000 protein (Fragment)	Os02g0712000	19582000	19046000	33321000	0	10099000	0	5	5	5	6.8	6.8	6.8	124.31	0	31.163	92608000	7	25388000	11376000	28860000	2291400	20580000	4113200	1543500	423130	189600	480990	38189	342990	68554	1	2	2	0	2	0	By MS/MS	By MS/MS	By MS/MS	By matching	By MS/MS	By matching
A0A0P0VNW4;Q6ZI17	A0A0P0VNW4;Q6ZI17	Os02g0719800 protein;Protein MEI2-like 2	Os02g0719800;ML2	0	0	0	0	0	2335600	1	1	1	2.8	2.8	2.8	47.331	0.0015898	7.1851	12058000	1	3297200	0	3074000	1671200	3099800	915760	602900	164860	0	153700	83558	154990	45788	0	0	1	0	0	0	By matching		By MS/MS	By matching	By matching	By matching
A0A0P0VPR8	A0A0P0VPR8	Os02g0761400 protein (Fragment)	Os02g0761400	0	0	0	0	0	16075000	1	1	1	14.6	14.6	14.6	13.833	0.00091408	11.529	43661000	5	12885000	11263000	13210000	0	0	6302900	5457600	1610600	1407900	1651300	0	0	787860	1	1	2	0	0	1	By MS/MS	By MS/MS	By MS/MS			By MS/MS
A0A0P0VQ66;Q6ZHE5	A0A0P0VQ66;Q6ZHE5	Os02g0773300 protein;Putative D-cysteine desulfhydrase 1, mitochondrial	Os02g0773300;Os02g0773300	0	0	2618900	0	0	0	1	1	1	2.9	2.9	2.9	41.379	0.0056738	6.0807	6957800	2	1858800	2311100	2788000	0	0	0	331320	88513	110050	132760	0	0	0	0	1	1	0	0	0	By matching	By MS/MS	By MS/MS
A0A0P0VQF9	A0A0P0VQF9	Os02g0783625 protein	Os02g0783625	0	0	3952600	0	0	0	1	1	1	2.8	2.8	2.8	59.145	0.00086133	8.4699	13852000	3	4971200	4672700	4207800	0	0	0	513030	184120	173060	155850	0	0	0	1	1	1	0	0	0	By MS/MS	By MS/MS	By MS/MS
A0A0P0VQM8	A0A0P0VQM8	Os02g0794400 protein (Fragment)	Os02g0794400	0	0	9745800	0	0	0	2	2	2	10.7	10.7	10.7	25.692	0	13.253	36742000	5	8611400	5918700	10375000	5201000	5011500	1624200	4082400	956820	657630	1152800	577890	556830	180460	1	1	1	1	1	0	By MS/MS	By MS/MS	By MS/MS	By MS/MS	By MS/MS	By matching
A0A0P0VRK8	A0A0P0VRK8	Os02g0818000 protein (Fragment)	Os02g0818000	7131400	6789800	8228900	6331400	5235000	6085800	2	2	2	13.9	13.9	13.9	25.24	0	12.532	35748000	4	7413400	5691400	7439300	6709600	5551300	2943200	3574800	741340	569140	743930	670960	555130	294320	1	1	2	0	0	0	By MS/MS	By MS/MS	By MS/MS	By matching	By matching	By matching
A0A0P0VRQ0;A0A0P0V3L2	A0A0P0VRQ0	Os02g0822300 protein	Os02g0822300	50626000	57287000	51964000	64650000	56851000	52833000	7	7	7	28.1	28.1	28.1	37.69	0	50.635	311590000	36	48794000	46069000	59855000	60697000	74588000	21588000	16399000	2568100	2424700	3150300	3194600	3925700	1136200	7	7	9	3	6	4	By MS/MS	By MS/MS	By MS/MS	By MS/MS	By MS/MS	By MS/MS
A0A0P0VRW1	A0A0P0VRW1	Os03g0101600 protein (Fragment)	Os03g0101600	65896000	68676000	52951000	46612000	41651000	47532000	8	8	8	34.2	34.2	34.2	36.513	0	62.455	300270000	31	60638000	62261000	65001000	41474000	53918000	16981000	16682000	3368800	3459000	3611200	2304100	2995400	943400	8	5	9	3	4	2	By MS/MS	By MS/MS	By MS/MS	By MS/MS	By MS/MS	By MS/MS
A0A0P0VSA9;A0A0P0VS15;Q84VF8;Q8LNW1	A0A0P0VSA9;A0A0P0VS15;Q84VF8;Q8LNW1	Nascent polypeptide-associated complex subunit beta (Fragment);Nascent polypeptide-associated complex subunit beta (Fragment)	Os03g0109600;NA	11818000	11382000	11828000	0	0	0	2	2	2	35	35	35	11.123	0	13.599	56319000	5	11556000	9582700	12707000	7094600	11782000	3596900	9386500	1926000	1597100	2117900	1182400	1963600	599480	1	1	1	1	1	0	By MS/MS	By MS/MS	By MS/MS	By MS/MS	By MS/MS	By matching
A0A0P0VSE5	A0A0P0VSE5	Os03g0122200 protein (Fragment)	Os03g0122200	60812000	56477000	51080000	73908000	54367000	42157000	5	5	5	29.3	29.3	29.3	23.539	0	32.268	325510000	16	59268000	49822000	62464000	57065000	80774000	16116000	23251000	4233400	3558700	4461700	4076100	5769500	1151100	3	4	3	2	4	0	By MS/MS	By MS/MS	By MS/MS	By MS/MS	By MS/MS	By matching
A0A0P0VSL6;Q0DVI1	A0A0P0VSL6;Q0DVI1	Os03g0128800 protein;Os03g0128800 protein	Os03g0128800;Os03g0128800	0	0	5096300	0	0	0	2	2	2	8.2	8.2	8.2	40.189	0	12.94	17478000	2	4553600	4193300	5425300	0	3085700	219970	873900	227680	209670	271270	0	154280	10998	1	0	1	0	0	0	By MS/MS	By matching	By MS/MS		By MS/MS	By matching
A0A0P0VUA6;P49397	A0A0P0VUA6;P49397	Os03g0200500 protein (Fragment);40S ribosomal protein S3a	Os03g0200500;RPS3A	66737000	72127000	74718000	91540000	96333000	74714000	7	7	3	36.1	36.1	14.5	28.998	0	81.295	446450000	27	67570000	62161000	77664000	80096000	126610000	32346000	29763000	4504700	4144000	5177600	5339800	8440800	2156400	4	3	5	4	9	2	By MS/MS	By MS/MS	By MS/MS	By MS/MS	By MS/MS	By MS/MS
A0A0P0VUL0	A0A0P0VUL0	Os03g0210600 protein (Fragment)	Os03g0210600	5630500	4532300	15260000	3134200	4001000	3752400	3	3	3	12	12	12	31.758	0	18.939	35277000	7	8301800	5418000	13708000	1982600	4691400	1174600	1411100	332070	216720	548330	79303	187660	46983	1	1	4	0	1	0	By MS/MS	By MS/MS	By MS/MS	By matching	By MS/MS	By matching
A0A0P0VUN4;Q10Q05;Q94E72	A0A0P0VUN4;Q10Q05;Q94E72	Os03g0214600 protein (Fragment);Os03g0214600 protein;Os01g0511300 protein	Os03g0214600;LOC_Os03g11570;NA	22594000	27915000	20974000	0	46543000	0	4	4	4	15.9	15.9	15.9	37.065	0	29.491	148950000	9	18204000	17782000	13223000	9332500	85655000	4753500	8761800	1070800	1046000	777820	548970	5038500	279620	2	3	2	0	2	0	By MS/MS	By MS/MS	By MS/MS	By matching	By MS/MS	By matching
A0A0P0VUP9;B9F676;A0A0P0VUP1;A0A0P0VUR3	A0A0P0VUP9;B9F676;A0A0P0VUP1;A0A0P0VUR3	Os03g0216600 protein (Fragment);Probable glucan 1,3-alpha-glucosidase	Os03g0216600;Os03g0216600	59553000	56478000	70321000	39659000	48398000	50799000	10	10	10	14.8	14.8	14.8	96.76	0	75.352	300140000	32	81188000	62679000	75323000	13627000	48348000	18978000	7503600	2029700	1567000	1883100	340670	1208700	474450	10	9	11	0	1	1	By MS/MS	By MS/MS	By MS/MS	By matching	By MS/MS	By MS/MS
A0A0P0VVI4	A0A0P0VVI4	Os03g0252100 protein (Fragment)	Os03g0252100	0	0	5025900	0	0	0	1	1	1	5.2	5.2	5.2	37.816	0.0015564	6.951	12616000	3	3850000	3415800	5350400	0	0	0	573460	175000	155260	243200	0	0	0	1	1	1	0	0	0	By MS/MS	By MS/MS	By MS/MS
A0A0P0VWM0;A0A0P0VWP0	A0A0P0VWM0;A0A0P0VWP0	Os03g0314500 protein (Fragment);Os03g0314500 protein (Fragment)	Os03g0314500;Os03g0314500	12682000	12609000	15783000	9664500	8113700	10780000	4	4	4	6.9	6.9	6.9	83.932	0	25.541	63360000	8	10875000	11675000	15301000	10136000	10729000	4643000	1508600	258930	277990	364300	241340	255460	110550	1	2	3	1	1	0	By MS/MS	By MS/MS	By MS/MS	By MS/MS	By MS/MS	By matching
A0A0P0VWN1;Q10N92	A0A0P0VWN1;Q10N92	Os03g0278200 protein (Fragment);Os03g0278200 protein	Os03g0278200;LOC_Os03g17000	0	10206000	12473000	0	0	0	4	4	4	8.4	8.4	8.4	59.229	0	23.101	37307000	7	3556600	6004900	16448000	4470600	5137000	1690300	1065900	101620	171570	469940	127730	146770	48294	1	1	4	1	0	0	By MS/MS	By MS/MS	By MS/MS	By MS/MS	By matching	By matching
A0A0P0VWN2;Q0DSZ9;Q10N90	A0A0P0VWN2;Q0DSZ9;Q10N90	Os03g0278300 protein (Fragment);Os03g0278300 protein (Fragment)	Os03g0278300;Os03g0278300	0	0	0	0	2915700	0	1	1	1	4.3	4.3	4.3	21.964	0	13.111	3784300	3	0	0	0	0	3784300	0	315350	0	0	0	0	315350	0	0	0	0	1	1	1				By MS/MS	By MS/MS	By MS/MS
A0A0P0VXC8;A0A0P0VXC6;Q10LJ0	A0A0P0VXC8;A0A0P0VXC6;Q10LJ0	Os03g0347200 protein (Fragment);Os03g0347200 protein (Fragment)	Os03g0347200;Os03g0347200	6639000	7711200	8655300	0	0	0	2	2	2	11	11	11	31.582	0	14.18	22319000	5	6482000	7057700	8546400	0	0	233090	1716900	498620	542900	657420	0	0	17930	2	1	2	0	0	0	By MS/MS	By MS/MS	By MS/MS			By matching
A0A0P0VZ71	A0A0P0VZ71	Os03g0557900 protein	Os03g0557900	0	0	0	0	0	107280000	1	1	1	13.6	13.6	13.6	12.754	0.0022642	6.6599	185580000	11	0	0	0	41945000	44994000	98637000	46394000	0	0	0	10486000	11248000	24659000	0	0	0	0	6	5				By matching	By MS/MS	By MS/MS
A0A0P0W0Q4;Q84PD0	A0A0P0W0Q4;Q84PD0	Os03g0648400 protein (Fragment);DNAJ-like protein	Os03g0648400;LOC_Os03g44620	6792600	6637700	6726700	0	0	0	5	2	2	19.7	8.6	8.6	26.739	0	11.873	19481000	2	7050300	5409800	7020600	0	0	0	1623400	587520	450820	585050	0	0	0	0	0	2	0	0	0	By matching	By matching	By MS/MS	By matching	By matching	By matching
A0A0P0W0Z6;Q850T5	A0A0P0W0Z6;Q850T5	Ferredoxin (Fragment);Ferredoxin	Os03g0659200;OSJNBb0047K21.3	0	0	12361000	0	0	0	1	1	1	9.4	9.4	9.4	14.803	0.00088106	10.613	43114000	8	15030000	14925000	13159000	0	0	0	4790500	1670000	1658400	1462100	0	0	0	3	3	2	0	0	0	By MS/MS	By MS/MS	By MS/MS
A0A0P0W131	A0A0P0W131	Os03g0639350 protein	Os03g0639350	0	0	0	0	0	48982000	1	1	1	3.7	3.7	3.7	38.417	0.0056338	6.0276	125780000	4	663320	0	0	70951000	34962000	19205000	8984300	47380	0	0	5067900	2497300	1371800	0	0	0	1	1	2	By matching			By MS/MS	By MS/MS	By MS/MS
A0A0P0W1G0	A0A0P0W1G0	Os03g0646800 protein	Os03g0646800	0	0	0	0	0	6043800	1	1	1	8.2	8.2	8.2	22.047	0.0015773	7.1107	27163000	1	5438400	0	5452300	6910100	6992100	2369700	3395300	679800	0	681530	863760	874010	296210	1	0	0	0	0	0	By MS/MS		By matching	By matching	By matching	By matching
A0A0P0W1T3;Q53RB0	A0A0P0W1T3;Q53RB0	Lipoxygenase (Fragment);Probable linoleate 9S-lipoxygenase 4	Os03g0700700;Os03g0700700	0	0	0	1476100	0	0	1	1	1	1.4	1.4	1.4	95.525	0.0056298	6.0248	1463800	0	0	0	0	1463800	0	0	26614	0	0	0	26614	0	0	0	0	0	0	0	0				By MS/MS
A0A0P0W1U0	A0A0P0W1U0	Os03g0703000 protein (Fragment)	Os03g0703000	0	0	9089800	0	0	0	8	1	1	29.1	3.7	3.7	40.215	0.0016247	7.4817	41178000	1	15908000	9048400	9676600	0	0	6545000	2287600	883760	502690	537590	0	0	363610	0	1	0	0	0	0	By MS/MS	By MS/MS	By matching	By matching	By matching	By matching
A0A0P0W1Y6;Q6ASX7;A0A0P0W1U8;Q10FE7	A0A0P0W1Y6;Q6ASX7;A0A0P0W1U8;Q10FE7	Os03g0670700 protein;Glycin-rich RNA-binding protein	Os03g0670700;LOC_Os03g46770	0	0	0	14204000	0	0	3	1	1	25.5	11.7	11.7	13.929	0.00085397	8.2726	14085000	2	0	0	0	14085000	0	0	1565000	0	0	0	1565000	0	0	0	0	0	2	0	0	By matching	By matching	By matching	By MS/MS	By matching	By matching
A0A0P0W1Z2;Q65WW7;Q10E49	A0A0P0W1Z2;Q65WW7;Q10E49	Os03g0708100 protein;Phytanoyl-CoA dioxygenase 2;Phytanoyl-CoA dioxygenase 1	Os03g0708100;Os05g0473900;NA	0	0	0	0	7161800	0	1	1	1	6.8	6.8	6.8	21.675	0.0022607	6.6363	39775000	2	7779700	7019700	8636900	7043400	9295100	0	3615900	707250	638160	785170	640310	845010	0	1	1	0	0	0	0	By MS/MS	By MS/MS	By matching	By matching	By matching
A0A0P0W2S8	A0A0P0W2S8	Os03g0704100 protein (Fragment)	Os03g0704100	0	0	0	0	0	3987800	1	1	1	4.4	4.4	4.4	30.494	0.00087336	10.227	23349000	4	2782500	2542100	3345800	5613000	7501800	1563600	1459300	173910	158880	209110	350810	468860	97723	0	1	1	1	1	0	By matching	By MS/MS	By MS/MS	By MS/MS	By MS/MS	By matching
A0A0P0W399	A0A0P0W399	Alpha-1,4 glucan phosphorylase (Fragment)	Os03g0758100	218850000	282180000	251480000	242980000	267590000	276470000	23	23	23	38.3	38.3	38.3	101.15	0	178.55	1506700000	121	236930000	233810000	282880000	190790000	484190000	78125000	36749000	5778700	5702600	6899500	4653400	11809000	1905500	21	28	31	13	19	9	By MS/MS	By MS/MS	By MS/MS	By MS/MS	By MS/MS	By MS/MS
A0A0P0W3T1	A0A0P0W3T1	Os03g0781000 protein	Os03g0781000	0	0	0	0	0	5592200	1	1	1	7.4	7.4	7.4	16.011	0.0075967	5.9439	48028000	4	6166800	5976000	7817700	12540000	13335000	2192600	5336500	685200	664000	868640	1393300	1481700	243620	0	0	1	1	1	1	By matching	By matching	By MS/MS	By MS/MS	By MS/MS	By MS/MS
A0A0P0W506;A0A0P0W4D5	A0A0P0W506;A0A0P0W4D5	Os03g0801600 protein (Fragment);Os03g0801600 protein (Fragment)	Os03g0801600;Os03g0801600	12510000	13486000	17948000	12196000	8814100	0	3	3	3	5.1	5.1	5.1	94.674	0	19.795	66188000	5	15712000	14282000	17448000	10022000	7209100	1515600	1470800	349160	317380	387720	222700	160200	33680	1	1	3	0	0	0	By MS/MS	By MS/MS	By MS/MS	By matching	By matching	By matching
A0A0P0W4J1;Q852M1;Q0DMV6;A0A0P0W429;Q852M2;Q7XH05;A0A0P0W4P0;A0A0P0XRW2	A0A0P0W4J1;Q852M1;Q0DMV6;A0A0P0W429;Q852M2;Q7XH05	Os03g0790900 protein (Fragment);Probable aldehyde oxidase 2	Os03g0790900;Os03g0790900	18156000	17670000	25977000	15518000	15108000	16128000	6	6	6	6.7	6.7	6.7	120.55	0	52.686	102810000	16	18981000	11271000	26606000	15698000	23588000	6670100	2016000	372180	221000	521680	307810	462510	130790	3	2	4	2	4	1	By MS/MS	By MS/MS	By MS/MS	By MS/MS	By MS/MS	By MS/MS
A0A0P0W604	A0A0P0W604	Os04g0107900 protein (Fragment)	Os04g0107900	0	0	8407000	0	0	0	4	1	1	16.9	5.2	5.2	27.957	0.0015748	7.0717	21776000	3	6197100	6628700	8949700	0	0	0	1814600	516420	552390	745810	0	0	0	1	1	1	0	0	0	By MS/MS	By MS/MS	By MS/MS	By matching	By matching	By matching
A0A0P0W625	A0A0P0W625	Os04g0111225 protein (Fragment)	Os04g0111225	26129000	25691000	19447000	0	29139000	40903000	5	5	5	37.9	37.9	37.9	21.072	0	37.635	142080000	14	24852000	21429000	23472000	13448000	45816000	13061000	12916000	2259300	1948100	2133800	1222500	4165100	1187400	3	4	4	0	2	1	By MS/MS	By MS/MS	By MS/MS	By matching	By MS/MS	By MS/MS
A0A0P0W6B7;A0A0P0W6L3;Q0JF82	A0A0P0W6B7;A0A0P0W6L3;Q0JF82	Os04g0129500 protein (Fragment);Os04g0129500 protein (Fragment)	Os04g0129500;Os04g0129500	0	0	0	0	0	7732600	1	1	1	3.1	3.1	3.1	50.749	0.002974	6.4537	31492000	1	6359000	3248100	5037200	7067000	6748700	3031800	1369200	276480	141220	219010	307260	293420	131820	0	1	0	0	0	0	By matching	By MS/MS	By matching	By matching	By matching	By matching
A0A0P0W6L8	A0A0P0W6L8	Os03g0859600 protein (Fragment)	Os03g0859600	0	0	1505400	0	0	0	4	1	1	13.8	4.5	4.5	32.905	0.0016168	7.4311	9831900	1	6338200	1891100	1602600	0	0	0	546210	352120	105060	89033	0	0	0	1	0	0	0	0	0	By MS/MS	By matching	By matching	By matching	By matching	By matching
A0A0P0W866	A0A0P0W866	Os04g0295300 protein	Os04g0295300	0	0	0	0	64335000	0	1	1	1	32.9	32.9	32.9	7.869	0.0036711	6.3041	83499000	1	0	0	0	0	83499000	0	16700000	0	0	0	0	16700000	0	0	0	0	0	1	0					By MS/MS
A0A0P0W8S4;Q9ST27	A0A0P0W8S4;Q9ST27	Os04g0304200 protein (Fragment);Phototropin-2	Os04g0304200;PHOT2	11421000	11542000	10977000	0	11295000	0	4	4	4	7.1	7.1	7.1	86.406	0	24.36	50364000	9	12432000	10812000	12000000	2655200	11053000	1411000	1481300	365650	318000	352960	78095	325090	41501	3	2	2	1	1	0	By MS/MS	By MS/MS	By MS/MS	By MS/MS	By MS/MS	By matching
A0A0P0W9I9;A0A0P0W9K7	A0A0P0W9I9;A0A0P0W9K7	Os04g0391900 protein (Fragment);Os04g0391900 protein (Fragment)	Os04g0391900;Os04g0391900	31831000	21998000	19382000	0	0	0	4	4	4	14.6	14.6	14.6	40.374	0	26.277	90428000	6	30274000	18749000	23183000	7082100	7571500	3568500	3931700	1316200	815190	1008000	307920	329200	155150	3	1	1	1	0	0	By MS/MS	By MS/MS	By MS/MS	By MS/MS	By matching	By matching
A0A0P0W9U3	A0A0P0W9U3	Os04g0409200 protein (Fragment)	Os04g0409200	49663000	62904000	56803000	0	41599000	50765000	7	7	7	45.9	45.9	45.9	28.664	0	55.93	251280000	17	60154000	65610000	58314000	12091000	40350000	14763000	17949000	4296700	4686400	4165300	863620	2882100	1054500	3	6	5	1	1	1	By MS/MS	By MS/MS	By MS/MS	By MS/MS	By MS/MS	By MS/MS
A0A0P0W9W2;A0A0P0WA25;A0A0P0W9J4	A0A0P0W9W2;A0A0P0WA25	Os04g0390000 protein;Os04g0390000 protein	Os04g0390000;Os04g0390000	1350400000	1271800000	1240800000	1092200000	1151300000	1287100000	34	34	25	40.7	40.7	31.8	115.6	0	323.31	6970700000	322	1370900000	974300000	1294800000	1126500000	1657900000	546300000	148310000	29167000	20730000	27549000	23969000	35275000	11623000	71	69	70	42	45	25	By MS/MS	By MS/MS	By MS/MS	By MS/MS	By MS/MS	By MS/MS
A0A0P0WTA4;Q2RAD9;Q0JCT1;A0A0P0WRT9;A0A0P0WSK4;A0A0P0WA64;A0A0P0WBB0;Q2QSW7	A0A0P0WTA4;Q2RAD9;Q0JCT1;A0A0P0WRT9;A0A0P0WSK4;A0A0P0WA64;A0A0P0WBB0;Q2QSW7	Os06g0159725 protein (Fragment);Histone H3.2;Histone H3.3	Os06g0159725;Os01g0866200;NA	76242000	78307000	75022000	49082000	49260000	36055000	2	2	2	10.6	10.6	10.6	14.88	0	12.899	365480000	52	76694000	64412000	80439000	49405000	70309000	24222000	73096000	15339000	12882000	16088000	9881000	14062000	4844500	6	7	7	12	14	6	By MS/MS	By MS/MS	By MS/MS	By MS/MS	By MS/MS	By MS/MS
A0A0P0WAB7;Q7XQP4;Q6ZI44;Q7XKA8;A0A0P0W3P0;A0A0P0XXV0;P0C5D6;Q75LR7;Q7Y0B9	A0A0P0WAB7;Q7XQP4;Q6ZI44;Q7XKA8;A0A0P0W3P0;A0A0P0XXV0;P0C5D6;Q75LR7;Q7Y0B9	Os04g0432000 protein (Fragment);Serine/threonine-protein kinase SAPK7	Os04g0432000;SAPK7	0	0	15774000	0	0	0	2	2	2	10.4	10.4	10.4	32.219	0	12.87	44171000	3	13894000	13484000	16792000	0	0	0	2598300	817280	793200	987790	0	0	0	1	1	1	0	0	0	By MS/MS	By MS/MS	By MS/MS
A0A0P0WAB9	A0A0P0WAB9	Acetyl-coenzyme A synthetase	Os04g0404800	77593000	87765000	80227000	65098000	77211000	70242000	8	8	4	13.5	13.5	7.8	81.669	0	59.225	430900000	28	75163000	60295000	80189000	76444000	105930000	32879000	11339000	1978000	1586700	2110200	2011700	2787600	865240	6	3	8	3	6	2	By MS/MS	By MS/MS	By MS/MS	By MS/MS	By MS/MS	By MS/MS
A0A0P0WBQ5	A0A0P0WBQ5	Os04g0481100 protein (Fragment)	Os04g0481100	0	0	0	0	0	380480	1	1	1	1.5	1.5	1.5	82.286	0.0015848	7.1513	4154400	1	770040	979230	1363700	419030	473220	149180	125890	23335	29674	41324	12698	14340	4520.7	0	0	1	0	0	0	By matching	By matching	By MS/MS	By matching	By matching	By matching
Q84PB3;A0A0P0WC18;A0A0N7KJB1;Q6K641	Q84PB3;A0A0P0WC18	Eukaryotic translation initiation factor isoform 4G-1;Os04g0499300 protein (Fragment)	Os04g0499300;Os04g0499300	18412000	21532000	14068000	0	0	0	5	5	5	7.2	7.2	7.2	87.021	0	32.675	94574000	9	19218000	15404000	17301000	11488000	27503000	3660000	1854400	376820	302040	339240	225260	539270	71764	2	2	2	1	1	1	By MS/MS	By MS/MS	By MS/MS	By MS/MS	By MS/MS	By MS/MS
A0A0P0WER7	A0A0P0WER7	Os04g0611200 protein (Fragment)	Os04g0611200	35690000	29740000	34466000	16262000	19420000	20079000	6	6	6	27.6	27.6	27.6	36.639	0	44.08	155440000	11	41593000	27563000	34098000	14278000	34954000	2950700	8180900	2189100	1450700	1794600	751470	1839700	155300	4	2	4	0	1	0	By MS/MS	By MS/MS	By MS/MS	By matching	By MS/MS	By matching
A0A0P0WF31;Q7X809;A0A0P0WF44	A0A0P0WF31;Q7X809;A0A0P0WF44	Os04g0623300 protein (Fragment);Polyamine oxidase 3	Os04g0623300;PAO3	10831000	12786000	9603700	0	0	0	2	2	2	7.1	7.1	7.1	44.278	0	16.962	43447000	7	10815000	9757100	11350000	5818000	4153200	1553800	2896400	720980	650480	756650	387860	276880	103590	2	2	2	1	0	0	By MS/MS	By MS/MS	By MS/MS	By MS/MS	By matching	By matching
A0A0P0WFX4	A0A0P0WFX4	Molybdopterin molybdenumtransferase (Fragment)	Os04g0661600	17787000	20231000	19642000	0	0	0	4	4	4	16.1	16.1	16.1	43.713	0	28.093	64558000	8	14123000	20945000	19509000	4491700	3691000	1798000	3586600	784620	1163600	1083800	249540	205060	99886	2	3	3	0	0	0	By MS/MS	By MS/MS	By MS/MS	By matching	By matching	By matching
A0A0P0WFZ1;Q7XMP7	A0A0P0WFZ1;Q7XMP7	Os04g0650700 protein;OSJNBb0059K02.14 protein	Os04g0650700;OSJNBb0059K02.14	0	0	0	0	7867500	0	2	2	2	15.1	15.1	15.1	20.268	0	14.916	39370000	4	9397400	10511000	9249700	0	10211000	0	3579100	854310	955590	840880	0	928270	0	1	1	1	0	1	0	By MS/MS	By MS/MS	By MS/MS		By MS/MS
A0A0P0WG85	A0A0P0WG85	Os04g0663100 protein	Os04g0663100	8903400	13268000	15839000	7308700	0	5314000	3	3	3	5.3	5.3	5.3	98.48	0	19.358	45363000	8	7706400	12464000	16267000	5501200	642810	2781900	855910	145400	235180	306920	103800	12129	52488	1	2	4	1	0	0	By MS/MS	By MS/MS	By MS/MS	By MS/MS	By matching	By matching
P25777;A0A0P0WGF4	P25777;A0A0P0WGF4	Oryzain beta chain;Os04g0670200 protein (Fragment)	Os04g0670200;Os04g0670200	14168000	14769000	13788000	12734000	0	12430000	3	3	3	8.6	8.6	8.6	49.798	0	21.919	65813000	6	16633000	10963000	19750000	9820700	4879800	3766300	3133900	792060	522050	940450	467650	232370	179350	3	1	2	0	0	0	By MS/MS	By MS/MS	By MS/MS	By matching	By matching	By matching
A0A0P0WGI0;B9FDD2	A0A0P0WGI0;B9FDD2	Os04g0683100 protein (Fragment);Os04g0683100 protein	Os04g0683100;Os04g0683100	0	0	0	0	0	6467200	1	1	1	7.4	7.4	7.4	21.679	0.0082702	5.9403	31197000	3	4914100	4393000	5820400	6525800	7007600	2535700	2836100	446740	399360	529130	593260	637050	230520	0	1	0	1	1	0	By matching	By MS/MS	By matching	By MS/MS	By MS/MS	By matching
A0A0P0WGW6	A0A0P0WGW6	Os05g0105050 protein	Os05g0105050	26783000	22119000	20191000	17931000	15695000	13377000	2	2	2	23.8	23.8	23.8	10.802	0	40.449	111610000	14	18709000	19315000	12848000	31982000	23657000	5103300	15945000	2672700	2759300	1835500	4568900	3379500	729040	4	3	3	2	1	1	By MS/MS	By MS/MS	By MS/MS	By MS/MS	By MS/MS	By MS/MS
A0A0P0WHN0;Q0D6N1	A0A0P0WHN0;Q0D6N1	Os05g0129100 protein (Fragment);Os07g0461900 protein (Fragment)	Os05g0129100;Os07g0461900	55608000	60727000	48484000	49875000	37701000	54440000	5	5	5	24.8	24.8	24.8	34.959	0	45.586	278370000	17	58759000	54215000	55561000	36367000	51689000	21781000	15465000	3264400	3011900	3086700	2020400	2871600	1210000	5	6	3	1	0	2	By MS/MS	By MS/MS	By MS/MS	By MS/MS	By matching	By MS/MS
A0A0P0WI29	A0A0P0WI29	DNA-directed RNA polymerase subunit	Os05g0151000	24290000	18758000	27245000	0	0	14492000	6	6	6	4.7	4.7	4.7	206.67	0	41.21	109710000	13	27251000	18099000	21401000	8271500	28549000	6134500	1261000	313230	208040	245990	95075	328150	70512	4	4	4	1	0	0	By MS/MS	By MS/MS	By MS/MS	By MS/MS	By matching	By matching
A0A0P0WIG6	A0A0P0WIG6	Os05g0156700 protein (Fragment)	Os05g0156700	0	0	2639900	0	0	0	2	1	1	10.7	5.6	5.6	24.849	0.0016103	7.3595	7430100	1	2422900	2196900	2810300	0	0	0	743010	242290	219690	281030	0	0	0	0	0	1	0	0	0	By matching	By matching	By MS/MS	By matching	By matching	By matching
Q8H8S1;A0A0P0WK98;A0A0P0W0L2	Q8H8S1;A0A0P0WK98;A0A0P0W0L2	Ribosomal protein L15;Ribosomal protein L15 (Fragment)	OSJNBa0087M10.1;Os05g0274900	24902000	20389000	24418000	29920000	27457000	19112000	5	5	5	21.1	21.1	21.1	24.333	0	31.018	141150000	15	15566000	13538000	25362000	34791000	43212000	8677500	17643000	1945800	1692300	3170300	4348900	5401500	1084700	1	2	4	4	4	0	By MS/MS	By MS/MS	By MS/MS	By MS/MS	By MS/MS	By matching
Q0DJF9;A0A0P0WKD6;B7F1B2	Q0DJF9;A0A0P0WKD6;B7F1B2	Os05g0291700 protein;Os05g0291700 protein;Os05g0291700 protein	Os05g0291700;Os05g0291700;NA	69670000	70704000	103370000	97546000	99363000	79550000	11	11	11	30.6	30.6	30.6	51.221	0	85.43	476000000	65	76429000	65078000	104570000	74597000	113330000	42003000	16414000	2635500	2244100	3605700	2572300	3908000	1448400	9	10	11	14	16	5	By MS/MS	By MS/MS	By MS/MS	By MS/MS	By MS/MS	By MS/MS
A0A0P0WKK9	A0A0P0WKK9	Os05g0313500 protein (Fragment)	Os05g0313500	9913900	10058000	10149000	0	0	0	2	2	2	7.2	7.2	7.2	35.244	0	13.026	31342000	4	9914600	8241900	10950000	0	0	2235600	1958900	619660	515120	684360	0	0	139720	1	2	1	0	0	0	By MS/MS	By MS/MS	By MS/MS			By matching
A0A0P0WL67;Q0DIY4	A0A0P0WL67;Q0DIY4	Os05g0350600 protein (Fragment);Os05g0350600 protein	Os05g0350600;Os05g0350600	7898000	10228000	10129000	0	0	0	2	2	2	33.8	33.8	33.8	8.343	0	12.867	35172000	4	7071900	8208400	12033000	3205300	3245800	1407000	7034300	1414400	1641700	2406700	641060	649160	281390	0	2	1	0	1	0	By matching	By MS/MS	By MS/MS	By matching	By MS/MS	By matching
A0A0P0WL76	A0A0P0WL76	Os05g0337400 protein	Os05g0337400	28290000	43352000	20252000	0	40937000	0	1	1	1	14	14	14	16.945	0	27.918	170550000	5	32896000	34403000	21649000	18817000	49564000	13217000	28424000	5482600	5733900	3608100	3136200	8260700	2202900	1	1	1	1	1	0	By MS/MS	By MS/MS	By MS/MS	By MS/MS	By MS/MS	By matching
A0A0P0WMY2;A0A0P0WMX1	A0A0P0WMY2;A0A0P0WMX1	Os05g0445500 protein (Fragment);Os05g0445500 protein (Fragment)	Os05g0445500;Os05g0445500	35339000	36104000	17082000	30041000	15550000	38491000	4	4	4	47.5	47.5	47.5	14.428	0	27.169	147660000	17	41517000	33790000	23114000	25291000	9321700	14625000	24610000	6919600	5631600	3852400	4215100	1553600	2437500	5	5	2	1	0	4	By MS/MS	By MS/MS	By MS/MS	By MS/MS	By matching	By MS/MS
A0A0P0WNI4	A0A0P0WNI4	Os05g0463500 protein (Fragment)	Os05g0463500	11601000	8489600	11735000	0	9573600	10619000	2	2	2	8.3	8.3	8.3	49.262	0	15.002	50117000	8	11204000	6759700	11908000	2978100	12667000	4600000	3341100	746930	450650	793880	198540	844480	306660	1	2	2	0	2	1	By MS/MS	By MS/MS	By MS/MS	By matching	By MS/MS	By MS/MS
A0A0P0WP33;A0A0N7KL10;A0A0P0WNZ4;A0A0P0V994	A0A0P0WP33;A0A0N7KL10	Phosphoglycerate kinase;Phosphoglycerate kinase (Fragment)	Os05g0496200;Os05g0496200	1934600000	1887800000	1977400000	2020500000	2123800000	2007900000	25	25	20	56.2	56.2	49.8	50.137	0	233.04	11837000000	328	1636300000	1575300000	1947800000	2091400000	3762700000	823340000	381830000	52785000	50815000	62833000	67463000	121380000	26560000	65	58	62	40	68	35	By MS/MS	By MS/MS	By MS/MS	By MS/MS	By MS/MS	By MS/MS
A0A0P0WP73;Q0DH32	A0A0P0WP73;Q0DH32	Os05g0494900 protein (Fragment);Os05g0494900 protein (Fragment)	Os05g0494900;Os05g0494900	0	0	4319700	0	0	0	1	1	1	5.1	5.1	5.1	27.446	0.005698	6.0947	12466000	1	5144300	2723300	4598600	0	0	0	1246600	514430	272330	459860	0	0	0	0	0	1	0	0	0	By matching	By matching	By MS/MS
A0A0P0WP88	A0A0P0WP88	Os05g0497150 protein (Fragment)	Os05g0497150	0	0	0	0	0	517080000	1	1	1	2	2	2	57.634	0.0036576	6.2743	3006000000	31	614890000	494220000	743440000	511750000	439000000	202740000	120240000	24596000	19769000	29737000	20470000	17560000	8109700	8	7	9	2	3	2	By MS/MS	By MS/MS	By MS/MS	By MS/MS	By MS/MS	By MS/MS
A0A0P0WQ42;Q0DGG8	A0A0P0WQ42;Q0DGG8	Os05g0533500 protein;Probable serine acetyltransferase 5	Os05g0533500;SAT5	0	0	0	0	0	6437900	1	1	1	5.4	5.4	5.4	33.092	0.00083752	7.9569	27507000	1	4280500	4208900	4571600	5478900	6442800	2524200	1833800	285360	280600	304770	365260	429520	168280	0	0	1	0	0	0	By matching	By matching	By MS/MS	By matching	By matching	By matching
Q6I608;A0A0P0WQT3	Q6I608;A0A0P0WQT3	Os05g0556900 protein;Os05g0555800 protein (Fragment)	Os05g0556900;Os05g0555800	0	0	0	0	0	13286000	1	1	1	16.2	16.2	16.2	12.661	0	15.531	70130000	6	10104000	9773900	11526000	16413000	17104000	5209500	10019000	1443400	1396300	1646600	2344700	2443400	744210	1	1	1	1	1	1	By MS/MS	By MS/MS	By MS/MS	By MS/MS	By MS/MS	By MS/MS
A0A0P0WR87;Q65XK0	A0A0P0WR87;Q65XK0	Os05g0573700 protein (Fragment);Ketol-acid reductoisomerase, chloroplastic	Os05g0573700;Os05g0573700	0	0	0	0	0	0	1	1	1	3.6	3.6	3.6	36.484	0.0050324	6.1537	0	1	0	0	0	0	0	0	0	0	0	0	0	0	0	0	0	0	0	1	0					By MS/MS
A0A0P0WRI7;Q688S7	A0A0P0WRI7;Q688S7	Os05g0581800 protein;Os05g0581800 protein	Os05g0581800;Os05g0581800	0	0	0	0	0	719280	1	1	1	1.6	1.6	1.6	84.393	0.0015302	6.7774	8624800	2	1754000	1214900	3228200	1031400	1114200	282020	287490	58468	40497	107610	34380	37140	9400.6	1	0	1	0	0	0	By MS/MS	By matching	By MS/MS	By matching	By matching	By matching
A0A0P0WRU0	A0A0P0WRU0	Os06g0120732 protein	Os06g0120732	0	0	0	0	0	8433400	4	1	1	35.1	11.9	11.9	18.659	0.00089445	11.009	50345000	4	14353000	11156000	10312000	11216000	0	3306600	8390800	2392200	1859400	1718700	1869400	0	551110	1	1	1	1	0	0	By MS/MS	By MS/MS	By MS/MS	By MS/MS	By matching	By matching
A0A0P0WT59;A0A0P0WTI1;A0A0P0WSW9	A0A0P0WT59;A0A0P0WTI1;A0A0P0WSW9	Os06g0167000 protein (Fragment);Os06g0167000 protein (Fragment)	Os06g0167000;Os06g0167000	0	0	0	0	0	2550200	1	1	1	3.4	3.4	3.4	40.363	0.0043636	6.254	7487200	1	0	0	0	2588100	3899200	999900	415960	0	0	0	143780	216620	55550	0	0	0	1	0	0				By MS/MS	By matching	By matching
A0A0P0WTC2	A0A0P0WTC2	Os06g0163600 protein (Fragment)	Os06g0163600	55209000	52827000	47442000	0	47931000	50238000	4	4	4	63.6	63.6	63.6	11.276	0	33.911	292650000	18	56473000	40751000	51279000	47411000	82453000	14281000	41807000	8067600	5821600	7325500	6773100	11779000	2040100	5	4	4	1	3	1	By MS/MS	By MS/MS	By MS/MS	By MS/MS	By MS/MS	By MS/MS
A0A0P0WUR7	A0A0P0WUR7	Os06g0255300 protein (Fragment)	Os06g0255300	0	0	0	0	0	0	1	1	1	1	1	1	91.049	0.0036738	6.3065	0	2	0	0	0	0	0	0	0	0	0	0	0	0	0	1	0	1	0	0	0	By MS/MS		By MS/MS
Q9LWN1;Q0DK10;A0A0P0WXQ4;Q0E2I8;A0A0P0Y2I2	Q9LWN1;Q0DK10;A0A0P0WXQ4;Q0E2I8	Os01g0205500 protein;60S ribosomal protein L11;Os06g0550000 protein (Fragment)	Os01g0205500;RPL11;NA	49250000	50157000	59470000	65006000	64122000	51243000	4	4	4	27.5	27.5	27.5	20.82	0	30.086	330900000	23	38304000	32068000	48765000	61665000	126730000	23361000	47271000	5472000	4581100	6966400	8809300	18105000	3337300	4	4	5	3	4	3	By MS/MS	By MS/MS	By MS/MS	By MS/MS	By MS/MS	By MS/MS
A0A0P0WYZ5;A0A0P0V7A3;A0A0P0WYK7	A0A0P0WYZ5;A0A0P0V7A3;A0A0P0WYK7	Os06g0611900 protein (Fragment);Os01g0711400 protein (Fragment)	Os06g0611900;Os01g0711400	1366100000	1119900000	1280100000	988600000	880780000	912850000	15	15	15	41	41	41	55.239	0	151.55	6318200000	280	1408600000	991040000	1446800000	1050400000	1019000000	402390000	287190000	64025000	45047000	65762000	47747000	46319000	18291000	57	52	56	42	37	36	By MS/MS	By MS/MS	By MS/MS	By MS/MS	By MS/MS	By MS/MS
A0A0P0WZL3	A0A0P0WZL3	D-3-phosphoglycerate dehydrogenase	Os06g0655100	0	7912300	6350000	0	17818000	0	4	4	4	7.6	7.6	7.6	67.938	0	25.237	47438000	5	3476400	5103800	8863400	5863200	22857000	1273700	1635800	119870	175990	305640	202180	788180	43921	1	1	1	0	2	0	By MS/MS	By MS/MS	By MS/MS	By matching	By MS/MS	By matching
A0A0P0X168;A0A0P0X161;Q01401	A0A0P0X168;A0A0P0X161;Q01401	Os06g0726400 protein (Fragment);Os06g0726400 protein (Fragment)	Os06g0726400;Os06g0726400	54569000	47897000	42175000	32791000	35675000	44905000	7	7	7	17	17	17	89.018	0	51.148	236550000	16	63121000	48218000	51703000	13053000	44000000	16456000	5913800	1578000	1205500	1292600	326320	1100000	411400	5	5	3	1	1	1	By MS/MS	By MS/MS	By MS/MS	By MS/MS	By MS/MS	By MS/MS
A0A0P0X1C3	A0A0P0X1C3	Os06g0728600 protein	Os06g0728600	20694000	15389000	18555000	0	0	0	5	5	5	8.1	8.1	8.1	96.686	0	29.366	61553000	8	13365000	8733300	32747000	3010200	2505200	1192000	1309600	284370	185820	696740	64047	53302	25362	3	1	4	0	0	0	By MS/MS	By MS/MS	By MS/MS	By matching	By matching	By matching
A0A0P0X1D1;Q5Z5A8	A0A0P0X1D1;Q5Z5A8	Os06g0729650 protein;Photosystem II stability/assembly factor HCF136, chloroplastic	Os06g0729650;HCF136	8871400	0	9080100	27973000	19637000	12449000	3	3	3	9.9	9.9	9.9	42.851	0	20.816	80425000	10	7913400	5466700	9052100	20674000	30581000	6737500	3217000	316540	218670	362090	826960	1223200	269500	2	1	1	2	3	1	By MS/MS	By MS/MS	By MS/MS	By MS/MS	By MS/MS	By MS/MS
A0A0P0X1K1;A0A0P0X1Z9;A0A0P0X1W2;Q8GRN5	A0A0P0X1K1;A0A0P0X1Z9;A0A0P0X1W2;Q8GRN5	Os07g0111700 protein (Fragment);Os07g0111700 protein (Fragment)	Os07g0111700;Os07g0111700	20119000	21229000	11594000	0	0	41505000	4	4	4	18.3	18.3	18.3	51.194	0	28.825	106540000	14	27082000	22635000	25916000	7980600	16738000	6184800	3945800	1003100	838340	959840	295580	619920	229070	4	5	2	1	1	1	By MS/MS	By MS/MS	By MS/MS	By MS/MS	By MS/MS	By MS/MS
A0A0P0X1N3;A0A0P0X1S7;Q8H5T7	A0A0P0X1N3;A0A0P0X1S7;Q8H5T7	Os07g0111600 protein (Fragment);Os07g0111600 protein (Fragment)	Os07g0111600;Os07g0111600	0	0	0	0	0	3486300	1	1	1	4.3	4.3	4.3	37.086	0.0015528	6.9124	26921000	2	9608800	424890	8195000	3476500	3848700	1366900	2243400	800730	35407	682920	289710	320720	113910	1	0	1	0	0	0	By MS/MS	By matching	By MS/MS	By matching	By matching	By matching
A0A0P0X334;Q6ZEZ2	A0A0P0X334;Q6ZEZ2	Os07g0176900 protein (Fragment);Os07g0176900 protein	Os07g0176900;P0534H07.29-1	16503000	11574000	30821000	18926000	39043000	24189000	4	4	4	25.8	25.8	25.8	28.688	0	32.104	137650000	10	33035000	7974200	36869000	13376000	38214000	8177200	12513000	3003100	724930	3351700	1216000	3474000	743380	2	1	3	1	2	1	By MS/MS	By MS/MS	By MS/MS	By MS/MS	By MS/MS	By MS/MS
Q5N754;A0A0P0X424	Q5N754;A0A0P0X424	Os01g0815800 protein;Os07g0224000 protein	Os01g0815800;Os07g0224000	0	0	0	0	0	10177000	1	1	1	7.4	7.4	7.4	18.453	0.00085106	8.2467	73205000	6	13129000	10954000	13997000	18076000	13060000	3990200	14641000	2625700	2190700	2799500	3615100	2611900	798040	1	1	1	1	1	1	By MS/MS	By MS/MS	By MS/MS	By MS/MS	By MS/MS	By MS/MS
A0A0P0X4D0;Q0D7W4;A0A0P0X3Z3	A0A0P0X4D0;Q0D7W4	Zeta-carotene desaturase (Fragment);Zeta-carotene desaturase	Os07g0204900;Os07g0204900	17269000	16773000	21958000	25260000	23457000	24735000	5	5	5	12.7	12.7	12.7	48.317	0	29.286	122020000	7	15996000	13067000	20389000	24671000	38464000	9433400	4880800	639850	522680	815580	986830	1538600	377340	1	0	3	2	1	0	By MS/MS	By matching	By MS/MS	By MS/MS	By MS/MS	By matching
A0A0P0X4X0	A0A0P0X4X0	Os07g0419900 protein	Os07g0419900	0	0	3705800	0	0	0	1	1	1	12.8	12.8	12.8	9.9937	0.0015337	6.8078	8661700	1	2544600	2172000	3945100	0	0	0	1237400	363510	310280	563580	0	0	0	0	0	1	0	0	0	By matching	By matching	By MS/MS
A0A0P0X5N3	A0A0P0X5N3	Os07g0420700 protein (Fragment)	Os07g0420700	0	16658000	16896000	0	0	0	2	2	2	4.7	4.7	4.7	113.51	0	15.96	51943000	3	5339700	13126000	18900000	0	14577000	0	1060100	108970	267880	385710	0	297490	0	0	1	2	0	0	0	By matching	By MS/MS	By MS/MS		By matching
Q6Z4A7;A0A0P0X6V5	Q6Z4A7;A0A0P0X6V5	Probable 5-adenylylsulfate reductase 1, chloroplastic;Os07g0509800 protein (Fragment)	APR1;Os07g0509800	17538000	25429000	22390000	12059000	13630000	0	3	3	3	10.1	10.1	10.1	50.591	0	19.75	95778000	10	17132000	19895000	25069000	4290300	28672000	719200	4353500	778750	904320	1139500	195010	1303300	32691	2	3	2	0	3	0	By MS/MS	By MS/MS	By MS/MS	By matching	By MS/MS	By matching
A0A0P0X7E2;B9FXV5;A0A0P0X756	A0A0P0X7E2;B9FXV5;A0A0P0X756	Os07g0555200 protein (Fragment);Eukaryotic translation initiation factor 4G	Os07g0555200;Os07g0555200	6101700	5969200	7100800	0	0	0	2	2	2	2.1	2.1	2.1	138.35	0.00087951	10.603	22086000	2	6192700	4990300	7422200	1752100	1186500	542240	362070	101520	81808	121680	28723	19450	8889.2	0	0	2	0	0	0	By matching	By matching	By MS/MS	By matching	By matching	By matching
A0A0P0X7V0;Q6ZL16	A0A0P0X7V0;Q6ZL16	Os07g0573800 protein (Fragment);Os07g0573800 protein	Os07g0573800;OJ1699_E05.22-1	187280000	180780000	146540000	64555000	29532000	111740000	8	8	8	41	41	41	27.491	0	81.483	644360000	48	216230000	141110000	158650000	49406000	37018000	41935000	46025000	15445000	10080000	11332000	3529000	2644100	2995400	17	12	13	2	1	3	By MS/MS	By MS/MS	By MS/MS	By MS/MS	By MS/MS	By MS/MS
A0A0P0X8P7;Q6ZIQ1;Q8RV12;Q75I90;Q75K79	A0A0P0X8P7;Q6ZIQ1;Q8RV12;Q75I90;Q75K79	Os07g0587400 protein (Fragment);Os07g0587400 protein;Os01g0939500 protein	Os07g0587400;Os07g0587400;NA	17341000	16909000	17580000	13016000	0	17913000	4	4	4	17.4	17.4	17.4	29.788	0	32.004	82956000	7	18671000	12465000	20180000	14841000	10854000	5944700	5925400	1333600	890370	1441400	1060100	775310	424620	1	1	2	2	1	0	By MS/MS	By MS/MS	By MS/MS	By MS/MS	By MS/MS	By matching
A0A0P0X8Y8;A0A0P0X923	A0A0P0X8Y8;A0A0P0X923	Os07g0621300 protein (Fragment);Os07g0621300 protein (Fragment)	Os07g0621300;Os07g0621300	9225200	10600000	11268000	0	0	0	2	2	2	9.1	9.1	9.1	28.135	0	13.554	42423000	10	9150800	8746700	12151000	4411500	6045200	1917400	2828200	610050	583110	810070	294100	403010	127820	3	2	3	1	1	0	By MS/MS	By MS/MS	By MS/MS	By MS/MS	By MS/MS	By matching
A0A0P0X9S9	A0A0P0X9S9	Os07g0663800 protein (Fragment)	Os07g0663800	21427000	22309000	29379000	0	0	24642000	3	3	2	13.4	13.4	9.5	29.666	0	23.324	102630000	7	22555000	19424000	32288000	7721700	12213000	8426400	7330600	1611100	1387400	2306300	551550	872360	601890	0	1	2	1	1	2	By matching	By MS/MS	By MS/MS	By MS/MS	By MS/MS	By MS/MS
A0A0P0XA30;Q6ZDX3	A0A0P0XA30;Q6ZDX3	Os07g0675000 protein (Fragment);Os07g0675000 protein	Os07g0675000;P0618H09.20-1	0	0	0	0	13191000	0	1	1	1	5.9	5.9	5.9	43.278	0.00092081	11.731	24069000	2	4041100	2907700	0	0	17120000	0	1146100	192430	138460	0	0	815240	0	1	0	0	0	1	0	By MS/MS	By matching			By MS/MS
A0A0P0XAH7	A0A0P0XAH7	Os07g0692900 protein (Fragment)	Os07g0692900	37413000	41834000	16440000	0	0	0	5	1	1	5.9	1.8	1.8	124.16	0	14.004	202060000	15	40043000	31048000	19451000	45261000	41141000	25118000	3424800	678700	526240	329670	767140	697300	425740	6	4	2	1	1	1	By MS/MS	By MS/MS	By MS/MS	By MS/MS	By MS/MS	By MS/MS
A0A0P0XB45;Q0J8G4	A0A0P0XB45;Q0J8G4	Os08g0113100 protein (Fragment);Fructokinase-2	Os08g0113100;FRK2	58292000	50304000	53694000	65768000	64363000	50885000	9	9	9	39.6	39.6	39.6	29.763	0	61.658	327960000	35	62798000	50165000	66171000	50093000	81104000	17628000	19292000	3694000	2950900	3892400	2946600	4770800	1036900	9	8	8	3	7	0	By MS/MS	By MS/MS	By MS/MS	By MS/MS	By MS/MS	By matching
A0A0P0XBI6;Q6YYB9;A0A0N7KP88	A0A0P0XBI6;Q6YYB9;A0A0N7KP88	Tryptophan synthase (Fragment);Tryptophan synthase	Os08g0135900;Os08g0135900	0	0	0	0	0	14376000	2	2	2	9.8	9.8	9.8	34.296	0	12.702	50788000	4	4888800	2778300	7657400	9910100	19916000	5636700	2987500	287580	163430	450430	582950	1171500	331570	1	1	1	0	1	0	By MS/MS	By MS/MS	By MS/MS	By matching	By MS/MS	By matching
A0A0P0XBL8;A0A0P0XCB8;A0A0P0V2G2	A0A0P0XBL8	Os08g0139700 protein (Fragment)	Os08g0139700	67504000	52600000	88542000	45305000	37345000	43102000	7	7	7	15.6	15.6	15.6	60.277	0	46.739	313380000	12	91019000	65998000	113890000	18555000	12786000	11134000	9217000	2677000	1941100	3349600	545730	376060	327460	3	2	5	1	1	0	By MS/MS	By MS/MS	By MS/MS	By MS/MS	By MS/MS	By matching
A0A0P0XBM6	A0A0P0XBM6	Os08g0109200 protein (Fragment)	Os08g0109200	12671000	11803000	11476000	0	15218000	0	3	3	3	9.1	9.1	9.1	45.6	0	19.551	58997000	5	8883100	10159000	13820000	2836500	22160000	1138200	2809400	423000	483780	658090	135070	1055300	54202	1	0	3	0	1	0	By MS/MS	By matching	By MS/MS	By matching	By MS/MS	By matching
Q948T6;A0A0P0XCY4	Q948T6;A0A0P0XCY4	Lactoylglutathione lyase;Os08g0191700 protein	GLYI-11;Os08g0191700	0	0	14145000	0	0	0	2	2	2	8.9	8.9	8.9	32.553	0.00091075	11.369	39807000	3	13136000	11612000	15059000	0	0	0	2653800	875710	774170	1003900	0	0	0	1	1	1	0	0	0	By MS/MS	By MS/MS	By MS/MS
A0A0P0XD82;Q6Z921	A0A0P0XD82;Q6Z921	Os08g0224700 protein (Fragment);26S proteasome non-ATPase regulatory subunit 1 homolog	Os08g0224700;Os08g0224700	0	0	11605000	0	0	0	2	2	2	3	3	3	61.049	0	13.192	42638000	3	12296000	10535000	12354000	0	3738000	3716300	2030400	585500	501640	588270	0	178000	176970	1	1	1	0	0	0	By MS/MS	By MS/MS	By MS/MS		By matching	By matching
A0A0P0XE67;Q6Z0P6	A0A0P0XE67;Q6Z0P6	Os08g0320100 protein (Fragment);Os08g0320100 protein	Os08g0320100;OJ1136_D12.118	5238900	6013700	5583400	0	0	0	2	2	2	7.6	7.6	7.6	25.9	0.00088968	10.924	24862000	3	4996700	5026500	6162600	0	6337900	2338100	1912400	384360	386650	474050	0	487530	179850	1	1	1	0	0	0	By MS/MS	By MS/MS	By MS/MS		By matching	By matching
A0A0P0XEA1	A0A0P0XEA1	Os08g0320400 protein	Os08g0320400	0	0	0	0	0	657790	1	1	1	5.6	5.6	5.6	25.155	0.0016	7.2589	7600300	6	1819800	1548700	2109100	760870	1104000	257910	584640	139980	119130	162240	58528	84920	19839	1	2	2	0	1	0	By MS/MS	By MS/MS	By MS/MS	By matching	By MS/MS	By matching
A0A0P0XEB1	A0A0P0XEB1	Os08g0323000 protein (Fragment)	Os08g0323000	9458200	11824000	10765000	0	0	0	2	2	2	6.7	6.7	6.7	48.6	0	16.241	34598000	6	9550800	9791000	11402000	1589800	2264400	0	1281400	353730	362630	422290	58881	83865	0	1	2	2	0	1	0	By MS/MS	By MS/MS	By MS/MS	By matching	By MS/MS
A0A0P0XEB3	A0A0P0XEB3	Os08g0266300 protein	Os08g0266300	24935000	24314000	27686000	0	20079000	18517000	4	4	4	19.3	19.3	19.3	31.852	0	36.304	125600000	9	17676000	9777700	22586000	4301200	65663000	5597500	7388300	1039700	575160	1328600	253010	3862500	329270	3	2	2	0	2	0	By MS/MS	By MS/MS	By MS/MS	By matching	By MS/MS	By matching
A0A0P0XUY5;A0A0P0XF80;Q109K8;Q109L0	A0A0P0XUY5;A0A0P0XF80;Q109K8;Q109L0	Os10g0461100 protein (Fragment);Os08g0347500 protein	Os10g0461100;Os08g0347500	0	0	0	0	2413900	0	1	1	1	10.5	10.5	10.5	12.048	0.00082102	7.6747	5451800	1	0	0	0	2318900	3132900	0	681480	0	0	0	289860	391610	0	0	0	0	0	1	0				By matching	By MS/MS
A0A0P0XIF8;Q0J4P2;A0A0P0XPT3	A0A0P0XIF8;Q0J4P2	Os08g0500700 protein (Fragment);Heat shock protein 81-1	Os08g0500700;HSP81-1	43484000	41122000	38638000	70242000	63940000	65525000	24	3	3	39.2	6.5	6.5	79.616	0	27.717	303520000	15	39913000	35677000	41602000	70182000	93255000	22893000	8672100	1140400	1019300	1188600	2005200	2664400	654080	2	2	2	3	4	2	By MS/MS	By MS/MS	By MS/MS	By MS/MS	By MS/MS	By MS/MS
A0A0P0XJ24	A0A0P0XJ24	Os09g0135400 protein (Fragment)	Os09g0135400	14949000	15671000	7074600	10496000	19499000	0	2	2	2	4.7	4.7	4.7	85.815	0	24.046	78358000	6	9636900	8371600	7879800	7707800	42569000	2193300	1822300	224110	194690	183250	179250	989970	51006	2	2	1	0	1	0	By MS/MS	By MS/MS	By MS/MS	By matching	By MS/MS	By matching
Q0J2R1;A0A0P0XL43	Q0J2R1;A0A0P0XL43	Probable protein phosphatase 2C 67;Os09g0314400 protein (Fragment)	Os09g0314400;Os09g0314400	0	0	0	0	310510	0	1	1	1	3.8	3.8	3.8	39.39	0.0056899	6.0884	3415300	1	823460	441920	1390500	356440	403000	0	179750	43340	23259	73185	18760	21210	0	0	0	1	0	0	0	By matching	By matching	By MS/MS	By matching	By matching
A0A0P0XL45;Q69LG7	A0A0P0XL45;Q69LG7	Os09g0294000 protein (Fragment);Aspartate kinase-homoserine dehydrogenase	Os09g0294000;Os09g0294000	28062000	25633000	24959000	0	21406000	13689000	11	5	5	19.8	8.4	8.4	74.245	0	33.665	112900000	12	30976000	23449000	28778000	4774100	20256000	4669200	2625600	720370	545330	669250	111030	471070	108590	3	2	3	1	2	1	By MS/MS	By MS/MS	By MS/MS	By MS/MS	By MS/MS	By MS/MS
A0A0P0XLG1	A0A0P0XLG1	Os09g0315700 protein	Os09g0315700	0	7000200	0	0	0	0	15	1	1	16.5	1	1	110.47	0.0069396	5.9633	11504000	3	5688400	5815600	0	0	0	0	194980	96414	98569	0	0	0	0	1	1	1	0	0	0	By MS/MS	By MS/MS	By MS/MS	By matching	By matching	By matching
A0A0P0XLP8;Q6ZD96;Q6Z537	A0A0P0XLP8;Q6ZD96;Q6Z537	Os09g0413500 protein (Fragment);Os08g0156800 protein;Os08g0436800 protein	Os09g0413500;Os08g0156800;NA	0	0	0	0	0	20979000	1	1	1	25.8	25.8	25.8	7.0401	0.00087108	9.5347	142130000	7	20477000	16517000	28939000	25754000	42219000	8225500	71066000	10238000	8258300	14469000	12877000	21109000	4112800	1	2	1	1	1	1	By MS/MS	By MS/MS	By MS/MS	By MS/MS	By MS/MS	By MS/MS
A0A0P0XMB6	A0A0P0XMB6	Os09g0407950 protein	Os09g0407950	0	0	2956400	0	0	0	2	2	2	3.5	3.5	3.5	109.68	0	14.836	20437000	2	5164200	3679900	3147300	3547300	3743900	1154100	364940	92218	65712	56202	63344	66856	20610	1	1	0	0	0	0	By MS/MS	By MS/MS	By MS/MS	By MS/MS	By matching	By matching
A0A0P0XPB0;Q6K4D4	A0A0P0XPB0;Q6K4D4	Os09g0471900 protein (Fragment);Os09g0471900 protein	Os09g0471900;Os09g0471900	0	0	0	0	2390500	0	1	1	1	2.8	2.8	2.8	54.541	0.0015736	7.0683	11970000	4	3072000	750450	3238900	1805600	3102600	0	478780	122880	30018	129550	72224	124100	0	1	0	1	1	1	0	By MS/MS	By matching	By MS/MS	By MS/MS	By MS/MS
A0A0P0XPM8;Q0J035	A0A0P0XPM8;Q0J035	Os09g0533100 protein (Fragment);Pantothenate kinase 2	Os09g0533100;Os09g0533100	27210000	27518000	30393000	0	0	0	7	7	7	12.8	12.8	12.8	83.407	0	43.387	102500000	12	25468000	22763000	34336000	10876000	5035200	4017800	2440400	606380	541970	817520	258950	119890	95661	3	3	5	0	1	0	By MS/MS	By MS/MS	By MS/MS	By matching	By MS/MS	By matching
A0A0P0XQ11	A0A0P0XQ11	Os09g0512800 protein	Os09g0512800	24362000	28035000	37256000	33484000	34281000	20007000	5	5	4	33.9	33.9	30.1	20.027	0	32.633	177270000	15	26250000	23238000	32152000	39728000	49008000	6892500	13636000	2019200	1787500	2473200	3056000	3769800	530190	3	3	5	1	3	0	By MS/MS	By MS/MS	By MS/MS	By MS/MS	By MS/MS	By matching
A0A0P0XRH7;Q33BE8	A0A0P0XRH7;Q33BE8	Os10g0113900 protein;NADH-dependent oxidoreductase 2, putative, expressed	Os10g0113900;LOC_Os10g02480	0	0	0	8502100	0	0	1	1	1	22.1	22.1	22.1	11.068	0.0036928	6.371	16881000	1	2756900	3649100	2043900	8430900	0	0	2411500	393840	521300	291980	1204400	0	0	0	1	0	0	0	0	By matching	By MS/MS	By matching	By matching
A0A0P0XT60;Q33AD8	A0A0P0XT60;Q33AD8	Os10g0190000 protein (Fragment);Os10g0190000 protein	Os10g0190000;LOC_Os10g11260	6982100	7026000	7692400	7303600	7074400	0	2	2	2	8.7	8.7	8.7	20.667	0.00090253	11.149	37929000	9	6678100	5870300	7954100	7746000	9151700	529120	4214400	742010	652260	883790	860660	1016900	58792	2	2	3	1	1	0	By MS/MS	By MS/MS	By MS/MS	By MS/MS	By MS/MS	By matching
A0A0P0XU17	A0A0P0XU17	Os10g0411700 protein (Fragment)	Os10g0411700	0	0	0	0	0	20165000	1	1	1	16.9	16.9	16.9	8.1895	0.00087566	10.364	194920000	19	20990000	23076000	24209000	16990000	99964000	9690100	48730000	5247500	5769000	6052400	4247500	24991000	2422500	3	2	3	3	6	2	By MS/MS	By MS/MS	By MS/MS	By MS/MS	By MS/MS	By MS/MS
A0A0P0XU67	A0A0P0XU67	Os10g0390500 protein (Fragment)	Os10g0390500	0	0	0	4211300	0	0	1	1	1	5.6	5.6	5.6	17.302	0.0043573	6.2468	4479000	1	0	0	302930	4176100	0	0	447900	0	0	30293	417610	0	0	0	0	0	1	0	0			By matching	By MS/MS
A0A0P0XUE2	A0A0P0XUE2	Os10g0403700 protein	Os10g0403700	27237000	26544000	26553000	0	12851000	0	3	3	3	9.2	9.2	9.2	41.013	0	23.682	95794000	13	29788000	22866000	29445000	3035000	10659000	0	5634900	1752300	1345100	1732100	178530	627020	0	4	4	4	0	1	0	By MS/MS	By MS/MS	By MS/MS	By matching	By MS/MS
A0A0P0XUE4;A0A0P0VTZ7;Q0IXY9	A0A0P0XUE4	Os10g0390500 protein (Fragment)	Os10g0390500	8201000	6356900	8925300	6071900	5978700	4957700	4	4	4	16.6	16.6	16.6	34.261	0	26.139	38784000	6	7684100	6151900	6857100	8622100	7800100	1668800	2983400	591090	473220	527470	663240	600010	128370	2	1	2	1	0	0	By MS/MS	By MS/MS	By MS/MS	By MS/MS	By matching	By matching
A0A0P0XVV6;Q0IWL9	A0A0P0XVV6;Q0IWL9	Os10g0500700 protein;Monothiol glutaredoxin-S11	Os10g0500700;GRXS11	25798000	27690000	28548000	15445000	15911000	14722000	5	5	5	21.9	21.9	21.9	41.444	0	37.202	121740000	18	23146000	22339000	27018000	23316000	20745000	5175900	6763400	1285900	1241000	1501000	1295400	1152500	287550	5	4	6	2	1	0	By MS/MS	By MS/MS	By MS/MS	By MS/MS	By MS/MS	By matching
A0A0P0XX30	A0A0P0XX30	Os10g0530500 protein	Os10g0530500	0	0	5755400	0	0	0	1	1	1	10.4	10.4	10.4	12.868	0.0015936	7.2169	15215000	3	4538000	4549700	6127000	0	0	0	1690500	504220	505520	680780	0	0	0	1	1	1	0	0	0	By MS/MS	By MS/MS	By MS/MS
A0A0P0XZK2;Q53PC7	A0A0P0XZK2;Q53PC7	Os11g0174000 protein (Fragment);Coatomer subunit beta-1	Os11g0174000;Os11g0174000	7718200	9416100	21575000	7562900	9363600	9222100	3	3	3	9.2	9.2	9.2	58.674	0	17.011	56639000	5	4408600	10453000	22005000	4378300	9259300	6134600	2097700	163280	387160	815000	162160	342940	227210	1	0	3	0	1	0	By MS/MS	By matching	By MS/MS	By matching	By MS/MS	By matching
A0A0P0Y1Y5;A0A0N7KSW1	A0A0P0Y1Y5	Adenosylhomocysteinase (Fragment)	Os11g0455500	25166000	20381000	18991000	0	19357000	21757000	3	3	3	7.8	7.8	7.8	56.77	0	20.616	104600000	6	27641000	11097000	22899000	5685900	29176000	8101500	4184000	1105700	443860	915980	227430	1167100	324060	2	2	2	0	0	0	By MS/MS	By MS/MS	By MS/MS	By matching	By MS/MS	By matching
A0A0P0Y248;A0A0P0Y200	A0A0P0Y248;A0A0P0Y200	Serine hydroxymethyltransferase;Os11g0455800 protein (Fragment)	Os11g0455800;Os11g0455800	541170000	496390000	555880000	500260000	554450000	583240000	15	15	12	45.9	45.9	36.3	51.445	0	152.92	3165600000	139	599240000	465370000	651540000	468470000	798660000	182350000	175870000	33291000	25854000	36197000	26026000	44370000	10130000	27	27	28	20	25	12	By MS/MS	By MS/MS	By MS/MS	By MS/MS	By MS/MS	By MS/MS
A0A0P0Y253;Q2R4J4;Q2QT65	A0A0P0Y253;Q2R4J4;Q2QT65	Os11g0472000 protein (Fragment);Zinc finger CCCH domain-containing protein 63	Os11g0472000;Os11g0472000	0	0	0	0	1413500	0	1	1	1	3.4	3.4	3.4	45.521	0.005618	6.0178	1834500	1	0	0	0	0	1834500	0	96553	0	0	0	0	96553	0	0	0	0	0	1	0					By MS/MS
A0A0P0Y2W5;A0A0P0Y2V3;A0A0P0Y2R8;Q2R3E0	A0A0P0Y2W5;A0A0P0Y2V3;A0A0P0Y2R8;Q2R3E0	Os11g0525600 protein (Fragment);Os11g0525600 protein (Fragment)	Os11g0525600;Os11g0525600	5669200	6053000	6375700	0	0	0	2	2	2	4.5	4.5	4.5	56.698	0	14.764	24993000	7	5609100	5020100	6862300	2652700	4849300	0	833120	186970	167340	228740	88424	161640	0	2	1	2	1	1	0	By MS/MS	By MS/MS	By MS/MS	By MS/MS	By MS/MS
Q7F8R1;A0A0P0Y2X7	Q7F8R1;A0A0P0Y2X7	Citrate synthase;Citrate synthase (Fragment)	P0437H03.132;Os11g0538900	0	0	4939500	0	4993200	0	2	2	2	6.1	6.1	6.1	52.229	0.00089526	11.034	25240000	2	2368700	3259700	5257000	6403100	6482300	1469300	1147300	107670	148170	238950	291050	294650	66785	0	0	1	0	1	0	By matching	By matching	By MS/MS	By matching	By MS/MS	By matching
A0A0P0Y344;Q6K3B8	A0A0P0Y344	Os11g0546000 protein	Os11g0546000	45901000	57567000	53292000	55092000	42674000	34572000	10	10	10	25.7	25.7	25.7	68.102	0	74.416	281850000	28	48369000	49975000	56901000	30029000	83974000	12601000	9091900	1560300	1612100	1835500	968670	2708800	406500	7	8	6	3	4	0	By MS/MS	By MS/MS	By MS/MS	By MS/MS	By MS/MS	By matching
Q2R2Z0;A0A0P0Y3G3	Q2R2Z0;A0A0P0Y3G3	Glutamyl-tRNA(Gln) amidotransferase subunit B, chloroplastic/mitochondrial;Os11g0544800 protein (Fragment)	GATB;Os11g0544800	2488800000	2552600000	2755400000	2075100000	2172200000	2045100000	6	6	6	15.4	15.4	15.4	60.096	0	40.911	18256000000	11	18343000	15706000	18717000	10373000	18190000000	3534100	588910000	591710	506660	603780	334620	586760000	114000	2	3	3	0	3	0	By MS/MS	By MS/MS	By MS/MS	By matching	By MS/MS	By matching
A0A0P0Y573	A0A0P0Y573	Os11g0673200 protein	Os11g0673200	7765300	5707600	7104900	3266900	3108000	2822100	2	2	2	3.6	3.6	3.6	70.197	0	12.81	28343000	8	7032200	5371200	6971500	3667300	4207500	1093300	833620	206830	157980	205040	107860	123750	32156	2	2	3	1	0	0	By MS/MS	By MS/MS	By MS/MS	By MS/MS	By matching	By matching
A0A0P0Y5Y8	A0A0P0Y5Y8	Os12g0105975 protein	Os12g0105975	0	0	0	0	0	12806000	12	1	1	49.9	6.4	6.4	41.941	0.00086505	8.7618	63267000	6	11098000	8355200	5395900	33397000	0	5020900	3329800	584090	439750	284000	1757700	0	264260	2	1	1	1	0	1	By MS/MS	By MS/MS	By MS/MS	By MS/MS	By matching	By MS/MS
P0C512;A0A0P0Y838;Q8S6F2;A0A0P0V969;Q0DI00	P0C512;A0A0P0Y838;Q8S6F2;A0A0P0V969	Ribulose bisphosphate carboxylase large chain;Os12g0207600 protein	rbcL;Os12g0207600	20269000000	18235000000	17126000000	17676000000	16451000000	18543000000	20	20	16	44.2	44.2	36.9	52.881	0	265.13	106590000000	1834	16612000000	13556000000	14935000000	20148000000	32628000000	8709600000	4845000000	755090000	616190000	678860000	915840000	1483100000	395890000	349	374	412	218	294	187	By MS/MS	By MS/MS	By MS/MS	By MS/MS	By MS/MS	By MS/MS
Q0IP17;A0A0P0Y8U1	Q0IP17;A0A0P0Y8U1	Os12g0264500 protein (Fragment);Os12g0264500 protein (Fragment)	Os12g0264500;Os12g0264500	23151000	22838000	23714000	15279000	12388000	11393000	3	3	3	7.2	7.2	7.2	53.935	0	21.968	107390000	19	19961000	16395000	22886000	13179000	30854000	4119300	4474800	831720	683120	953590	549130	1285600	171640	4	3	4	2	5	1	By MS/MS	By MS/MS	By MS/MS	By MS/MS	By MS/MS	By MS/MS
A0A0P0Y983;Q0INV6	A0A0P0Y983;Q0INV6	Os12g0287300 protein (Fragment);Os12g0287300 protein (Fragment)	Os12g0287300;Os12g0287300	12340000	13322000	20920000	13806000	11864000	14749000	3	3	3	11.7	11.7	11.7	28.778	0	20.093	80829000	12	14095000	13372000	22287000	8649200	16878000	5546800	5051800	880970	835760	1392900	540580	1054900	346680	1	2	3	2	3	1	By MS/MS	By MS/MS	By MS/MS	By MS/MS	By MS/MS	By MS/MS
A0A0P0YA40	A0A0P0YA40	Os12g0489200 protein (Fragment)	Os12g0489200	0	0	0	0	0	17783000	1	1	1	46.5	46.5	46.5	5.2127	0.00085616	8.3073	41372000	5	8064200	8392900	10239000	7702900	0	6972500	20686000	4032100	4196500	5119600	3851400	0	3486200	1	1	1	1	0	1	By MS/MS	By MS/MS	By MS/MS	By MS/MS		By MS/MS
A0A0P0YAG3	A0A0P0YAG3	Os12g0507500 protein	Os12g0507500	0	0	0	0	0	8776200	1	1	1	6.1	6.1	6.1	19.327	0.0022472	6.5191	52317000	4	8276900	7343100	8777900	12357000	12121000	3441000	5813000	919660	815900	975320	1373000	1346800	382340	1	0	1	1	0	1	By MS/MS	By matching	By MS/MS	By MS/MS	By matching	By MS/MS
A0A0P0YAL3	A0A0P0YAL3	Phenylalanine ammonia-lyase	Os12g0520200	564930000	489960000	576500000	361790000	383920000	402600000	24	24	8	41.9	41.9	17.2	73.6	0	215.03	2606500000	189	536870000	343120000	666160000	352770000	518580000	189050000	66835000	13766000	8798000	17081000	9045400	13297000	4847400	43	35	39	25	30	17	By MS/MS	By MS/MS	By MS/MS	By MS/MS	By MS/MS	By MS/MS
A0A0P0YB25;Q2QP62	A0A0P0YB25;Q2QP62	Os12g0540900 protein (Fragment);Os12g0540900 protein	Os12g0540900;LOC_Os12g35570	15040000	15267000	13269000	0	0	0	3	3	3	13.4	13.4	13.4	37.587	0	19.998	49944000	8	14781000	13366000	13526000	4335200	2949000	986080	2497200	739070	668310	676320	216760	147450	49304	1	3	2	1	1	0	By MS/MS	By MS/MS	By MS/MS	By MS/MS	By MS/MS	By matching
A0A0P0YBI9;A0A0P0YBG5	A0A0P0YBI9;A0A0P0YBG5	Os12g0568800 protein (Fragment);Os12g0568800 protein (Fragment)	Os12g0568800;Os12g0568800	6125000	6503400	5299200	0	0	6957200	2	2	2	5.9	5.9	5.9	50.387	0	12.139	25913000	3	5444800	4946300	6164200	0	6340300	3017400	1363800	286570	260330	324430	0	333700	158810	1	0	2	0	0	0	By MS/MS	By matching	By MS/MS		By matching	By matching
A0A0P0YCA1	A0A0P0YCA1	Os12g0597600 protein	Os12g0597600	16392000	19265000	16794000	0	0	0	3	3	2	20.5	20.5	13.9	18.18	0	17.693	69496000	8	17371000	15317000	17718000	7319300	8919300	2852300	13899000	3474200	3063400	3543500	1463900	1783900	570460	1	4	2	0	1	0	By MS/MS	By MS/MS	By MS/MS	By matching	By MS/MS	By matching
A0A0P0YCJ3;Q0IM09	A0A0P0YCJ3;Q0IM09	Sulfurtransferase (Fragment);Sulfurtransferase	Os12g0608600;Os12g0608600	33460000	34797000	30782000	33636000	27125000	34568000	6	6	6	24	24	24	34.146	0	45.215	177440000	27	30216000	19854000	40829000	27220000	42425000	16893000	9857600	1678600	1103000	2268300	1512200	2357000	938490	5	5	7	3	6	1	By MS/MS	By MS/MS	By MS/MS	By MS/MS	By MS/MS	By MS/MS
Q9XEA6;A0A0P0YDB6	Q9XEA6;A0A0P0YDB6	Cysteine synthase;Cysteine synthase (Fragment)	RCS1;Os12g0625000	13672000	15562000	11599000	0	47537000	20674000	5	5	4	24.6	24.6	20.9	33.838	0	41.1	116270000	8	23457000	20970000	26599000	13846000	25124000	6273900	6119500	1234600	1103700	1399900	728760	1322300	330210	1	4	0	1	2	0	By MS/MS	By MS/MS	By matching	By MS/MS	By MS/MS	By matching
Q2QLW3;Q2QXB3;A0A0P0YDC8	Q2QLW3;Q2QXB3;A0A0P0YDC8	Deoxyhypusine hydroxylase-B;Deoxyhypusine hydroxylase-A	Os12g0626100;Os12g0163300	0	0	1910400	0	0	0	1	1	1	7.9	7.9	7.9	32.791	0.00369	6.3695	8480900	3	3713400	2733600	2033800	0	0	0	498870	218440	160800	119630	0	0	0	1	1	1	0	0	0	By MS/MS	By MS/MS	By MS/MS
A3ANB5	A3ANB5	Actin-related protein 7	ARP7	0	0	0	0	4839000	0	2	2	2	8.9	8.9	8.9	39.6	0.00089286	10.973	19823000	0	2798800	1846800	5912600	2984300	6280400	0	1166100	164640	108630	347800	175550	369440	0	0	0	0	0	0	0	By MS/MS	By matching	By matching	By matching	By MS/MS
A3C0C6;Q5N801	A3C0C6;Q5N801	Peptidylprolyl isomerase;Peptidylprolyl isomerase	Os09g0501850;Os01g0915800	0	8042100	0	0	0	0	2	2	2	17.5	17.5	17.5	16.29	0.00088731	10.881	33256000	3	4459000	6681100	3823000	5347600	6259800	6685800	4750900	637000	954450	546140	763940	894260	955120	0	1	0	1	1	0	By matching	By MS/MS	By matching	By MS/MS	By MS/MS	By matching
A3C4S4	A3C4S4	GDP-mannose 3,5-epimerase 1	GME-1	115070000	118570000	132150000	106060000	99181000	147480000	9	9	5	29.9	29.9	16.1	42.778	0	78.241	652510000	59	94313000	75979000	141970000	108390000	165830000	66033000	28370000	4100600	3303500	6172700	4712500	7209800	2871000	12	11	13	11	7	5	By MS/MS	By MS/MS	By MS/MS	By MS/MS	By MS/MS	By MS/MS
A3C6D7	A3C6D7	Actin-2	ACT2	0	0	0	0	0	6010600	12	1	1	41.6	3.4	3.4	41.679	0.0015552	6.9427	9397500	1	0	0	0	0	7040900	2356700	447500	0	0	0	0	335280	112220	0	0	0	0	0	1	By matching	By matching	By matching	By matching	By matching	By MS/MS
A3C6G9	A3C6G9	Glycine cleavage system H protein, mitochondrial	GDCSH	345900000	288670000	241540000	265040000	287590000	376640000	4	4	4	47.6	47.6	47.6	17.367	0	100.33	1693000000	80	338770000	251470000	293300000	228130000	426830000	154500000	169300000	33877000	25147000	29330000	22813000	42683000	15450000	17	15	15	11	13	9	By MS/MS	By MS/MS	By MS/MS	By MS/MS	By MS/MS	By MS/MS
A3C994;Q53MM5	A3C994;Q53MM5	Os11g0182200 protein;Os11g0182200 protein	Os11g0182200;LOC_Os11g07960	0	0	0	0	0	5250400	1	1	1	4.3	4.3	4.3	47.72	0.0022693	6.6691	27594000	1	4495200	5323500	15717000	0	0	2058600	1314000	214060	253500	748420	0	0	98030	0	0	1	0	0	0	By MS/MS	By matching	By MS/MS			By matching
Q60EZ7;B7E324	Q60EZ7;B7E324	Os05g0186000 protein;Os05g0186000 protein	OJ1111_A10.15;Os05g0186000	32198000	24491000	34796000	26253000	0	38030000	2	2	2	23	23	23	13.351	0	13.497	187620000	12	30521000	25630000	31437000	30953000	55043000	14031000	46904000	7630300	6407500	7859400	7738100	13761000	3507800	2	3	1	2	2	2	By MS/MS	By MS/MS	By MS/MS	By MS/MS	By MS/MS	By MS/MS
B7E390	B7E390	Os10g0442600 protein	Os10g0442600	0	0	0	0	0	5320600	4	1	1	30.3	7.7	7.7	21.817	0.0015601	6.959	34630000	3	3246800	3268100	3839500	0	22190000	2086100	2885900	270570	272340	319960	0	1849100	173850	1	1	1	0	0	0	By MS/MS	By MS/MS	By MS/MS	By matching	By matching	By matching
B7E3S3	B7E3S3	Os04g0412500 protein	Os04g0412500	18684000	16616000	34373000	0	0	0	2	2	2	13.3	13.3	13.3	31.152	0	15.959	94545000	6	15956000	11569000	42359000	0	22055000	2605600	6303000	1063700	771290	2823900	0	1470300	173710	2	2	1	0	1	0	By MS/MS	By MS/MS	By MS/MS		By MS/MS	By matching
B7E4J4;Q0DIK2	B7E4J4;Q0DIK2	Os05g0382600 protein;Os05g0382600 protein (Fragment)	Os05g0382600;Os05g0382600	28453000	33684000	27725000	0	0	0	4	4	4	16.3	16.3	16.3	35.369	0	30.161	104480000	12	29032000	27689000	29276000	6872300	8495600	3119900	4749300	1319600	1258600	1330700	312380	386160	141810	2	3	3	2	2	0	By MS/MS	By MS/MS	By MS/MS	By MS/MS	By MS/MS	By matching
B7E707;Q0J0H4	B7E707;Q0J0H4	Pyruvate dehydrogenase E1 component subunit beta;Pyruvate dehydrogenase E1 component subunit beta-2, mitochondrial	Os09g0509200;Os09g	0	0	0	0	0	20215000	2	1	1	7.6	4.5	4.5	38.511	0	14.486	87095000	2	0	14640000	17112000	15546000	31871000	7925900	6699600	0	1126200	1316300	1195800	2451600	609680	0	0	0	1	1	0	By matching	By MS/MS	By MS/MS	By MS/MS	By MS/MS	By MS/MS
Q0J0Q8;B7E905;B9G4E8	Q0J0Q8;B7E905;B9G4E8	Os09g0502000 protein;Os09g0501100 protein;Os09g0501700 protein	Os09g0502000;Os09g0501100;NA	0	0	0	0	56238000	0	1	1	1	12.8	12.8	12.8	15.674	0	16.482	72990000	2	0	0	0	0	72990000	0	14598000	0	0	0	0	14598000	0	0	0	0	0	2	0					By MS/MS
Q8H852;Q6Z382;B7EEW9	Q8H852;Q6Z382;B7EEW9	Coatomer subunit gamma-1;Coatomer subunit gamma-2;Coatomer subunit gamma	Os03g0227000;Os07g0201100;NA	8339700	9491300	6664100	15170000	10726000	10046000	4	4	4	4.5	4.5	4.5	98.605	0	27.118	55560000	11	8623100	7655300	6757000	15127000	13133000	4265000	1111200	172460	153110	135140	302540	262660	85300	2	2	1	3	2	1	By MS/MS	By MS/MS	By MS/MS	By MS/MS	By MS/MS	By MS/MS
B7EIC7	B7EIC7	Os09g0482680 protein	Os09g0482680	0	0	0	0	10047000	0	2	2	2	5.8	5.8	5.8	40.266	0	13.313	26951000	2	1946600	1288900	2902700	7427700	13039000	345800	1497300	108150	71605	161260	412650	724410	19211	0	0	1	0	1	0	By matching	By matching	By MS/MS	By matching	By MS/MS	By matching
B7EIQ8	B7EIQ8	Os02g0125700 protein	Os02g0125700	0	0	4643900	0	0	0	1	1	1	6	6	6	27.593	0.0056497	6.039	8039200	2	3095500	0	4943700	0	0	0	574230	221110	0	353120	0	0	0	1	0	1	0	0	0	By MS/MS		By MS/MS
B7EW17	B7EW17	Os02g0725100 protein	Os02g0725100	7001700	6574100	8510400	0	8674100	0	2	2	2	6.5	6.5	6.5	46.645	0	13.166	37645000	5	5159800	3950700	8922100	1157100	16177000	2278700	1882300	257990	197530	446110	57853	808840	113940	1	1	1	0	2	0	By MS/MS	By MS/MS	By MS/MS	By matching	By MS/MS	By matching
Q0JCW9;B7F6I0	Q0JCW9;B7F6I0	3-oxoacyl-[acyl-carrier-protein] synthase;3-oxoacyl-[acyl-carrier-protein] synthase	Os04g0445700;Os04g0445700	15162000	20917000	18691000	15004000	13155000	17515000	7	4	4	29.6	16.5	16.5	46.871	0	26.011	90195000	8	15543000	16947000	18605000	16281000	15501000	7316700	5305600	914320	996890	1094400	957730	911840	430390	2	1	1	2	2	0	By MS/MS	By MS/MS	By MS/MS	By MS/MS	By MS/MS	By matching
B7FA23	B7FA23	Os03g0305000 protein	Os03g0305000	39831000	40025000	45337000	27621000	21022000	21383000	8	5	5	18.9	13.1	13.1	61.515	0	36.354	186470000	23	46760000	35869000	51883000	16171000	28674000	7114300	7769600	1948300	1494500	2161800	673780	1194800	296430	7	6	7	2	1	0	By MS/MS	By MS/MS	By MS/MS	By MS/MS	By MS/MS	By matching
B7FA34;A0A0N7KDK1	B7FA34	Os05g0548900 protein	Os05g0548900	0	45803000	29388000	36670000	34015000	69750000	5	5	5	14.3	14.3	14.3	56.45	0	31.803	278480000	9	83489000	63592000	76969000	20865000	22406000	11164000	9945900	2981800	2271100	2748900	745170	800200	398710	1	2	2	1	1	2	By MS/MS	By MS/MS	By MS/MS	By MS/MS	By MS/MS	By MS/MS
B7FAE9;Q0ITA3	B7FAE9	Glutathione peroxidase	Os06g0185900	115830000	112100000	120520000	54794000	47870000	42624000	5	5	5	22.6	22.6	22.6	25.072	0	33.229	472030000	35	121320000	83970000	137330000	47832000	59215000	22363000	39336000	10110000	6997500	11444000	3986000	4934600	1863600	11	7	9	3	3	2	By MS/MS	By MS/MS	By MS/MS	By MS/MS	By MS/MS	By MS/MS
B9ET62	B9ET62	Os01g0764900 protein	Os01g0764900	13524000	8460800	7472800	0	8259000	7801800	2	2	2	11.7	11.7	11.7	49.725	0	13.96	42185000	3	12153000	8157900	7742700	0	11106000	3024900	1917500	552410	370810	351940	0	504820	137500	2	0	1	0	0	0	By MS/MS	By matching	By MS/MS		By matching	By matching
B9EWG6;B9FMH1	B9EWG6;B9FMH1	Pyridoxal phosphate homeostasis protein;Pyridoxal phosphate homeostasis protein	Os01g0950866;Os05g0150000	13344000	10863000	7348500	6708400	6257900	0	2	2	2	9.8	9.8	9.8	26.362	0	13.086	46197000	6	13404000	8452100	8224300	6757300	8312900	1046900	3553600	1031100	650160	632640	519790	639450	80531	2	2	1	1	0	0	By MS/MS	By MS/MS	By MS/MS	By MS/MS	By matching	By matching
B9EXM2;A0A0P0V4H1	B9EXM2	Carbamoyl-phosphate synthase large chain, chloroplastic	CARB	157440000	152510000	166330000	170060000	179190000	147450000	22	22	22	28.4	28.4	28.4	127.77	0	171.7	929680000	62	165400000	150230000	184300000	86961000	285580000	57200000	14526000	2584400	2347400	2879800	1358800	4462200	893750	14	12	17	5	13	1	By MS/MS	By MS/MS	By MS/MS	By MS/MS	By MS/MS	By MS/MS
B9EZD5	B9EZD5	Os01g0134900 protein	Os01g0134900	16324000	13817000	13534000	0	10545000	0	3	3	3	7.5	7.5	7.5	61.363	0	18.788	63869000	6	17991000	10232000	17738000	5021000	9411000	3476000	2281000	642520	365440	633490	179320	336110	124140	3	1	2	0	0	0	By MS/MS	By MS/MS	By MS/MS	By matching	By matching	By matching
B9F460	B9F460	Os02g0810450 protein	Os02g0810450	0	0	0	0	0	2433400	1	1	1	1.5	1.5	1.5	79.902	0.0056697	6.072	7137000	2	2472500	1864400	1845900	0	0	954120	237900	82418	62146	61530	0	0	31804	1	1	0	0	0	0	By MS/MS	By MS/MS	By matching			By matching
B9F7Z4	B9F7Z4	Os03g0856200 protein	Os03g0856200	0	0	0	0	1413300	0	1	1	1	6.8	6.8	6.8	16.611	0.0056219	6.0197	14004000	1	3597600	3041900	4139100	1390800	1834300	0	1750500	449700	380240	517380	173850	229290	0	0	0	1	0	0	0	By matching	By matching	By MS/MS	By matching	By matching
B9F813	B9F813	Os04g0234600 protein	Os04g0234600	88247000	88831000	89019000	103540000	94310000	125200000	8	8	8	23	23	23	42.245	0	52.195	541840000	38	104570000	87543000	117600000	79772000	112510000	39834000	24629000	4753400	3979200	5345600	3626000	5114200	1810600	7	5	8	5	10	3	By MS/MS	By MS/MS	By MS/MS	By MS/MS	By MS/MS	By MS/MS
B9FF83	B9FF83	Nicotinate phosphoribosyltransferase	Os04g0429800	0	0	1636200	0	0	0	1	1	1	3.4	3.4	3.4	62.437	0.0056778	6.0809	1741900	1	0	0	1741900	0	0	0	66996	0	0	66996	0	0	0	0	0	1	0	0	0			By MS/MS
B9FI63	B9FI63	GTPase ERA-like, chloroplastic	Os05g0567300	6903500	7998600	5744600	0	0	0	3	3	3	8	8	8	47.862	0	18.24	22266000	6	5428700	5242600	9482600	0	991810	1120300	927750	226200	218440	395110	0	41325	46680	1	2	3	0	0	0	By MS/MS	By MS/MS	By MS/MS		By matching	By matching
B9FK36;A0A0N7KKG9	B9FK36	Acetyl-CoA carboxylase 2	ACC2	230850000	256110000	240470000	194770000	199010000	224770000	37	32	32	22.2	20.1	20.1	257.71	0	224.75	1269800000	112	241050000	211740000	256160000	151000000	315130000	94747000	9998600	1898000	1667200	2017000	1188900	2481400	746040	22	22	25	12	24	7	By MS/MS	By MS/MS	By MS/MS	By MS/MS	By MS/MS	By MS/MS
B9FM04	B9FM04	Os05g0104650 protein	Os05g0104650	22582000	21560000	24429000	0	0	0	3	3	3	2.8	2.8	2.8	154.05	0	19.899	92789000	5	22350000	16972000	27457000	10378000	9280500	6351700	1145500	275920	209530	338970	128120	114570	78417	2	1	2	0	0	0	By MS/MS	By MS/MS	By MS/MS	By matching	By matching	By matching
Q6Z2Z3;B9FQQ6;Q6K2Q1;A0A0P0VEQ0	Q6Z2Z3;B9FQQ6;Q6K2Q1	26S proteasome non-ATPase regulatory subunit 2 homolog;26S proteasome non-ATPase regulatory subunit 2 homolog	Os02g0146700;Os06g0699	29103000	28916000	35075000	23375000	21843000	20753000	7	7	7	8.7	8.7	8.7	98.157	0	48.541	161820000	23	28696000	26200000	41322000	14127000	48040000	3432500	2889600	512430	467850	737900	252270	857860	61295	4	6	5	2	5	1	By MS/MS	By MS/MS	By MS/MS	By MS/MS	By MS/MS	By MS/MS
B9FS74	B9FS74	Kinesin-like protein KIN-14L	KIN14L	51693000	51072000	58366000	34969000	28680000	24369000	9	9	9	9.2	9.2	9.2	144.51	0	62.038	234220000	20	54680000	46179000	64367000	30184000	28652000	10157000	3346000	781140	659700	919530	431190	409310	145100	8	4	7	1	0	0	By MS/MS	By MS/MS	By MS/MS	By MS/MS	By matching	By matching
B9FSH5;A0A0N7KLU9	B9FSH5	Alanine--tRNA ligase, chloroplastic/mitochondrial	Os06g0245800	135990000	134590000	140500000	107870000	94537000	104840000	15	15	15	18.2	18.2	18.2	108.16	0	207.59	665270000	61	139030000	128030000	140160000	95255000	122340000	40470000	10730000	2242300	2064900	2260700	1536400	1973200	652730	15	13	16	5	9	3	By MS/MS	By MS/MS	By MS/MS	By MS/MS	By MS/MS	By MS/MS
B9G434;A0A0P0XNU2	B9G434	Isoamylase 3, chloroplastic	ISA3	29044000	28884000	32126000	15876000	19305000	13805000	7	7	7	13.7	13.7	13.7	87.532	0	49.578	134710000	21	30712000	26093000	35565000	13951000	24137000	4252200	3640800	830060	705220	961210	377050	652350	114920	5	9	5	1	1	0	By MS/MS	By MS/MS	By MS/MS	By MS/MS	By MS/MS	By matching
B9GC17	B9GC17	Os12g0165900 protein	Os12g0165900	0	0	0	0	0	11080000	1	1	1	1.9	1.9	1.9	98.724	0.00083542	7.9363	44886000	3	7492100	5880900	9864900	7897100	9407000	4344300	2040300	340550	267310	448400	358960	427590	197470	1	1	1	0	0	0	By MS/MS	By MS/MS	By MS/MS	By matching	By matching	By matching
C7J0Y1	C7J0Y1	Molybdopterin molybdenumtransferase	Os04g0661600	0	0	7031200	0	0	0	1	1	1	31	31	31	7.4914	0.0016077	7.3428	24152000	3	9559000	7108100	7485100	0	0	0	8050800	3186300	2369400	2495000	0	0	0	1	1	1	0	0	0	By MS/MS	By MS/MS	By MS/MS
C7J965	C7J965	Os11g0573000 protein (Fragment)	Os11g0573000	0	0	0	2079100	0	0	8	1	1	37.9	4.1	4.1	33.952	0.0043447	6.2355	14034000	2	3329100	3413600	5229400	2061700	0	0	877120	208070	213350	326840	128850	0	0	0	1	1	0	0	0	By matching	By MS/MS	By MS/MS	By matching	By matching	By matching
C7JA12	C7JA12	Os12g0263050 protein	Os12g0263050	0	0	0	0	1821200	0	1	1	1	12.3	12.3	12.3	10.732	0.00083963	7.9982	13571000	3	2929200	2517100	3954600	1806500	2363600	0	1938700	418460	359590	564940	258070	337660	0	1	1	1	0	0	0	By MS/MS	By MS/MS	By MS/MS	By matching	By matching
O04226;A0A0P0WNC7	O04226;A0A0P0WNC7	Delta-1-pyrroline-5-carboxylate synthase 1;Os05g0455500 protein (Fragment)	P5CS1;Os05g0455500	24411000	26208000	41729000	23567000	29514000	24356000	5	5	5	10.3	10.3	10.3	77.744	0	34.228	184630000	10	19250000	16068000	34775000	16579000	94398000	3559000	4293700	447680	373670	808710	385550	2195300	82766	2	2	4	0	2	0	By MS/MS	By MS/MS	By MS/MS	By matching	By MS/MS	By matching
O04882;Q65XM9	O04882;Q65XM9	Farnesyl diphosphate synthase;Os05g0543400 protein	FPPS1;Os05g0543400	0	0	0	0	0	15068000	2	2	2	9.1	9.1	9.1	40.676	0	14.425	58847000	3	13456000	19996000	19487000	0	0	5907800	2942400	672820	999790	974370	0	0	295390	1	1	1	0	0	0	By MS/MS	By MS/MS	By MS/MS			By matching
O04985	O04985	Non-symbiotic hemoglobin 2	HB2	0	0	0	9647900	0	0	2	2	2	16	16	16	18.615	0	13.461	30787000	3	5608200	4971900	6607000	9567100	2936700	1096000	3078700	560820	497190	660700	956710	293670	109600	1	0	0	1	0	1	By MS/MS	By matching	By matching	By MS/MS	By matching	By MS/MS
O22386;Q9ZWF5;A0A0N7KDG4	O22386;Q9ZWF5	50S ribosomal protein L12, chloroplastic;Os05g0568300 protein	RPL12-2;rpl12-1	146040000	152790000	124970000	200400000	262800000	176110000	6	6	6	48.6	48.6	48.6	18.59	0	63.32	1074600000	59	172460000	151300000	170190000	174190000	332430000	74071000	107460000	17246000	15130000	17019000	17419000	33243000	7407100	12	10	11	10	8	8	By MS/MS	By MS/MS	By MS/MS	By MS/MS	By MS/MS	By MS/MS
O24174	O24174	Betaine aldehyde dehydrogenase 1	BADH1	18420000	19130000	13918000	0	0	0	5	5	5	19	19	19	54.647	0	32.985	66853000	8	18382000	16658000	13877000	12169000	4739500	1028500	3183500	875350	793220	660790	579460	225690	48977	2	2	2	2	0	0	By MS/MS	By MS/MS	By MS/MS	By MS/MS	By matching	By matching
O64422;A0A0N7KGZ9	O64422	Fructose-1,6-bisphosphatase, chloroplastic	Os03g0267300	244460000	237500000	214090000	179230000	164890000	206520000	8	8	8	26.1	26.1	26.1	43.604	0	163.29	1203900000	70	220300000	200300000	226350000	156670000	330900000	69339000	66881000	12239000	11128000	12575000	8704000	18383000	3852200	14	16	17	7	9	7	By MS/MS	By MS/MS	By MS/MS	By MS/MS	By MS/MS	By MS/MS
O64437;Q8S5N2	O64437	Inositol-3-phosphate synthase 1	RINO1	98020000	112800000	133120000	117860000	98384000	149250000	11	11	11	31	31	31	56.264	0	93.456	636790000	42	130090000	115130000	142720000	78025000	116680000	54157000	26533000	5420500	4797000	5946500	3251000	4861500	2256600	9	9	12	5	3	4	By MS/MS	By MS/MS	By MS/MS	By MS/MS	By MS/MS	By MS/MS
O64937;A0A0N7KGP4;A0A0P0VTT8	O64937;A0A0N7KGP4;A0A0P0VTT8	Elongation factor 1-alpha;Os03g0177400 protein (Fragment);Os03g0177900 protein	REFA1;Os03g0177400;NA	4191800000	3916400000	3793600000	3542600000	3687300000	4668900000	18	18	18	44.3	44.3	44.3	49.292	0	232.15	23332000000	515	4441200000	3701500000	4745600000	3475000000	5319400000	1649600000	933290000	177650000	148060000	189820000	139000000	212780000	65983000	117	109	96	65	73	55	By MS/MS	By MS/MS	By MS/MS	By MS/MS	By MS/MS	By MS/MS
O65037;A0A0N7KEB7	O65037	50S ribosomal protein L27, chloroplastic	RPL27	4791500	0	5024500	39278000	70618000	10154000	3	3	3	18.5	18.5	18.5	21.268	0	34.689	140570000	7	10327000	7801200	12105000	45945000	57529000	6865000	12779000	938820	709200	1100500	4176800	5229900	624090	2	1	0	2	2	0	By MS/MS	By MS/MS	By matching	By MS/MS	By MS/MS	By matching
O82143	O82143	26S proteasome non-ATPase regulatory subunit 4 homolog	RPN10	0	0	13843000	0	0	0	2	2	2	9.2	9.2	9.2	42.383	0	14.403	54482000	5	11006000	11640000	14737000	8087300	7463600	1548300	3891600	786160	831420	1052600	577660	533120	110600	1	1	1	1	1	0	By MS/MS	By MS/MS	By MS/MS	By MS/MS	By MS/MS	By matching
O82451;A0A0P0V8J4;Q93WM2;O65857;A0A0P0V328	O82451	Probable glutathione S-transferase GSTF2	GSTF2	99543000	67513000	105040000	76289000	67429000	109300000	6	6	6	31.6	31.6	31.6	23.977	0	81.109	522840000	34	77846000	64870000	115670000	26505000	209600000	28353000	58093000	8649500	7207800	12852000	2945000	23289000	3150300	6	7	6	5	7	3	By MS/MS	By MS/MS	By MS/MS	By MS/MS	By MS/MS	By MS/MS
P0C031;P0C030;P0CH35;P0CH34;Q67V00;A0A0P0X0E0;A0A0P0X6U8;Q58G87;Q0J9W6;A0A0P0VF30;A0A0P0X005;P0C032	P0C031;P0C030;P0CH35;P0CH34;Q67V00;A0A0P0X0E0;A0A0P0X6U8;Q58G87;Q0J9W6;A0A0P0VF30;A0A0P0X005	Ubiquitin-NEDD8-like protein RUB2;Ubiquitin-NEDD8-like protein RUB1	RUB2;RUB1	174970000	194130000	175580000	163730000	57893000	131740000	5	5	2	42.5	42.5	20.3	17.094	0	34.801	798880000	29	187940000	157730000	182350000	130150000	79318000	61399000	114130000	26848000	22533000	26049000	18592000	11331000	8771300	6	5	6	4	5	3	By MS/MS	By MS/MS	By MS/MS	By MS/MS	By MS/MS	By MS/MS
P0C2Z3	P0C2Z3	ATP synthase epsilon chain, chloroplastic	atpE	0	12406000	0	0	0	0	3	3	3	55.5	55.5	55.5	15.217	0	22.536	131910000	3	16686000	10307000	2234100	22765000	75054000	4867500	26383000	3337200	2061400	446830	4553000	15011000	973490	1	1	0	0	1	0	By MS/MS	By MS/MS	By matching	By matching	By MS/MS	By MS/MS
P0C2Z6	P0C2Z6	ATP synthase subunit alpha, chloroplastic	atpA	466960000	500490000	577890000	745010000	648230000	564170000	19	19	18	46.2	46.2	44.8	55.664	0	243.9	3435200000	188	456060000	409480000	606880000	731130000	1002600000	228990000	132120000	17541000	15749000	23342000	28121000	38563000	8807500	39	34	39	29	32	15	By MS/MS	By MS/MS	By MS/MS	By MS/MS	By MS/MS	By MS/MS
P0C314	P0C314	ATP-dependent Clp protease proteolytic subunit	clpP	42070000	44762000	24387000	0	0	0	2	2	2	11.6	11.6	11.6	24.727	0	21.156	139810000	18	41647000	36982000	26675000	0	24698000	9810400	15535000	4627500	4109100	2963900	0	2744200	1090000	4	4	4	0	4	2	By MS/MS	By MS/MS	By MS/MS		By MS/MS	By MS/MS
P0C337	P0C337	NAD(P)H-quinone oxidoreductase subunit H, chloroplastic	ndhH	12424000	13988000	13165000	0	13695000	15347000	3	3	3	10.9	10.9	10.9	45.685	0	19.897	67361000	9	13649000	12086000	14496000	7751000	12708000	6671200	2928700	593420	525460	630260	337000	552540	290050	2	2	3	2	0	0	By MS/MS	By MS/MS	By MS/MS	By MS/MS	By matching	By matching
P0C380	P0C380	Translation initiation factor IF-1, chloroplastic	infA	0	0	0	0	1876600	0	1	1	1	13.1	13.1	13.1	12.417	0.001581	7.1124	10584000	0	2715000	2231800	3202100	0	2435500	0	5292200	1357500	1115900	1601000	0	1217800	0	0	0	0	0	0	0	By MS/MS	By MS/MS	By MS/MS		By matching
P0C389	P0C389	Cytochrome f	petA	0	0	0	0	5948700	0	2	2	2	7.8	7.8	7.8	35.467	0	12.416	44332000	3	8605900	7524900	10371000	7472400	7720600	2636600	2333200	452940	396050	545860	393280	406350	138770	1	1	0	1	0	0	By MS/MS	By MS/MS	By MS/MS	By MS/MS	By matching	By matching
P0C440	P0C440	50S ribosomal protein L14, chloroplastic	rpl14	53767000	55721000	61763000	101060000	87814000	58982000	5	5	5	47.2	47.2	47.2	13.565	0	36.935	415420000	30	48350000	40919000	58339000	116180000	133250000	18379000	51927000	6043700	5114800	7292300	14522000	16657000	2297300	5	6	6	5	6	2	By MS/MS	By MS/MS	By MS/MS	By MS/MS	By MS/MS	By MS/MS
P0C443;A0A0P0Y1A9	P0C443	50S ribosomal protein L16, chloroplastic	rpl16	47484000	44786000	43610000	49110000	44601000	41286000	5	5	5	48.5	48.5	48.5	15.529	0	34.601	274540000	20	51512000	44499000	47814000	52767000	69931000	8014400	54907000	10302000	8899900	9562700	10553000	13986000	1602900	4	6	4	2	2	2	By MS/MS	By MS/MS	By MS/MS	By MS/MS	By MS/MS	By MS/MS
P0C446	P0C446	50S ribosomal protein L22, chloroplastic	rpl22	0	0	0	0	0	0	2	2	2	13.4	13.4	13.4	17.683	0.00090171	11.148	0	2	0	0	0	0	0	0	0	0	0	0	0	0	0	0	0	1	0	1	0			By MS/MS		By MS/MS
P0C451	P0C451	50S ribosomal protein L23, chloroplastic	rpl23-A	40159000	22039000	43867000	42369000	105690000	56414000	3	3	3	38.7	38.7	38.7	10.764	0	26.181	327800000	19	40204000	25899000	40120000	29825000	171890000	19856000	54633000	6700700	4316500	6686600	4970800	28649000	3309300	2	2	3	5	4	3	By MS/MS	By MS/MS	By MS/MS	By MS/MS	By MS/MS	By MS/MS
P0C454	P0C454	50S ribosomal protein L32, chloroplastic	rpl32	0	0	0	0	0	6896500	1	1	1	19	19	19	7.3155	0.0029828	6.4629	18018000	2	0	0	0	6146800	9167600	2704000	9009200	0	0	0	3073400	4583800	1352000	0	0	0	1	1	0				By MS/MS	By MS/MS	By matching
P0C457	P0C457	50S ribosomal protein L33, chloroplastic	rpl33	40165000	33671000	50196000	27873000	23829000	16934000	3	3	3	34.8	34.8	34.8	7.6429	0	21.363	187630000	14	37933000	26636000	57486000	24989000	33723000	6857900	46906000	9483300	6659000	14372000	6247200	8430800	1714500	4	3	3	2	2	0	By MS/MS	By MS/MS	By MS/MS	By MS/MS	By MS/MS	By matching
P0C470	P0C470	30S ribosomal protein S15, chloroplastic	rps15-A	0	0	0	7508000	0	0	2	2	2	27.8	27.8	27.8	10.882	0	14.547	35359000	2	0	0	0	7445100	27913000	0	7071700	0	0	0	1489000	5582700	0	0	0	0	1	1	0				By MS/MS	By MS/MS
P0C477;A0A0P0V3F2	P0C477;A0A0P0V3F2	30S ribosomal protein S18, chloroplastic;Os01g0523401 protein	rps18;Os01g0523401	25402000	20299000	30091000	23980000	45250000	33020000	4	4	4	22.1	22.1	22.1	19.656	0	25.192	177670000	19	25563000	9808700	18223000	39662000	71292000	13122000	25381000	3651800	1401200	2603300	5666000	10185000	1874500	4	2	3	2	5	3	By MS/MS	By MS/MS	By MS/MS	By MS/MS	By MS/MS	By MS/MS
P0C482	P0C482	30S ribosomal protein S2, chloroplastic	rps2	58158000	47105000	60890000	84209000	103760000	79083000	5	5	5	24.6	24.6	24.6	26.992	0	33.939	414640000	37	57775000	43876000	69987000	86641000	124620000	31740000	41464000	5777500	4387600	6998700	8664100	12462000	3174000	6	7	6	5	5	8	By MS/MS	By MS/MS	By MS/MS	By MS/MS	By MS/MS	By MS/MS
P0C485	P0C485	30S ribosomal protein S3, chloroplastic	rps3	47950000	45466000	45171000	55084000	31348000	55773000	4	4	4	20.1	20.1	20.1	27.518	0	32.147	281650000	18	53386000	43989000	51624000	60222000	48120000	24314000	20118000	3813300	3142000	3687400	4301600	3437100	1736700	3	1	3	7	2	2	By MS/MS	By MS/MS	By MS/MS	By MS/MS	By MS/MS	By MS/MS
P0C488	P0C488	30S ribosomal protein S4, chloroplastic	rps4	103630000	96659000	159110000	162200000	408680000	151780000	11	11	11	50.7	50.7	50.7	23.422	0	84.821	1278900000	60	127810000	98856000	118810000	229990000	649540000	53843000	116260000	11619000	8986900	10801000	20908000	59049000	4894800	9	9	12	9	13	8	By MS/MS	By MS/MS	By MS/MS	By MS/MS	By MS/MS	By MS/MS
P0C491;A0A0P0VAJ9	P0C491	30S ribosomal protein S7, chloroplastic	rps7-A	107720000	113280000	158430000	169960000	144040000	116700000	6	6	6	34	34	34	17.629	0	37.199	798740000	30	99488000	88238000	136450000	179460000	256960000	38152000	99843000	12436000	11030000	17056000	22433000	32120000	4769000	6	5	6	3	8	2	By MS/MS	By MS/MS	By MS/MS	By MS/MS	By MS/MS	By MS/MS
P0C494	P0C494	30S ribosomal protein S8, chloroplastic	rps8	70699000	94274000	125080000	164810000	314630000	153680000	6	6	6	41.9	41.9	41.9	15.61	0	44.171	1067200000	33	104220000	102360000	166160000	148490000	491810000	54195000	152460000	14889000	14622000	23738000	21212000	70259000	7742200	5	5	7	5	8	3	By MS/MS	By MS/MS	By MS/MS	By MS/MS	By MS/MS	By MS/MS
P0C497	P0C497	50S ribosomal protein L2, chloroplastic	rpl2-A	61315000	47815000	72695000	120180000	104090000	92629000	6	6	6	31.1	31.1	31.1	29.941	0	58.38	475410000	38	57125000	37142000	61379000	126230000	155870000	37669000	36570000	4394200	2857100	4721500	9709700	11990000	2897600	8	6	9	5	6	4	By MS/MS	By MS/MS	By MS/MS	By MS/MS	By MS/MS	By MS/MS
P0C500	P0C500	DNA-directed RNA polymerase subunit alpha	rpoA	0	0	0	0	10280000	0	2	2	2	7.4	7.4	7.4	38.667	0	12.717	27869000	2	3167900	2978100	3928100	3284800	13342000	1168200	1466800	166730	156740	206740	172880	702200	61485	0	0	0	1	1	0	By matching	By matching	By matching	By MS/MS	By MS/MS	By matching
P0C509	P0C509	DNA-directed RNA polymerase subunit beta	rpoC2	6203600	5694800	7316300	8690300	7689500	6495300	3	3	3	2	2	2	173.78	0	19.844	39723000	6	7312200	5802000	8845100	8694900	6973400	2095200	509270	93746	74385	113400	111470	89402	26862	0	1	1	2	2	0	By MS/MS	By MS/MS	By MS/MS	By MS/MS	By MS/MS	By matching
P0C522;Q8HCP8	P0C522	ATP synthase subunit alpha, mitochondrial	ATPA	141630000	146290000	163190000	200880000	155730000	199250000	15	14	14	36.7	35.4	35.4	55.373	0	106.45	938580000	78	145710000	133160000	181070000	177260000	222900000	78481000	34762000	5396700	4931800	6706400	6565200	8255600	2906700	20	15	19	8	11	5	By MS/MS	By MS/MS	By MS/MS	By MS/MS	By MS/MS	By MS/MS
P0C540;A0A0P0VAT4	P0C540;A0A0P0VAT4	Actin-7;Os01g0866100 protein	ACT7;Os01g0866100	88634000	87504000	59935000	100780000	66042000	64947000	12	4	4	42	17	17	41.614	0	36.073	463850000	31	67318000	113310000	69799000	42394000	127640000	43384000	22088000	3205600	5395800	3323800	2018800	6078300	2065900	8	10	5	2	4	2	By MS/MS	By MS/MS	By MS/MS	By MS/MS	By MS/MS	By MS/MS
P0C5D5	P0C5D5	Peroxiredoxin Q, chloroplastic	Os06g0196300	416060000	411880000	520160000	633880000	488350000	501810000	7	7	7	33.2	33.2	33.2	23.737	0	61.044	2887300000	94	390750000	498750000	675490000	600610000	579160000	142500000	222100000	30057000	38365000	51960000	46201000	44551000	10962000	15	15	19	16	19	10	By MS/MS	By MS/MS	By MS/MS	By MS/MS	By MS/MS	By MS/MS
P0DKK0;P0DKJ9	P0DKK0;P0DKJ9	26S proteasome regulatory subunit 7B;26S proteasome regulatory subunit 7A	RPT1B;RPT1A	38483000	38214000	41828000	43966000	38951000	38236000	8	8	8	22.5	22.5	22.5	47.682	0	58.858	217510000	19	33495000	29552000	53239000	31583000	49932000	19713000	7768400	1196200	1055400	1901400	1128000	1783300	704040	3	3	6	1	4	2	By MS/MS	By MS/MS	By MS/MS	By MS/MS	By MS/MS	By MS/MS
P35685;P0DKK7	P35685;P0DKK7	60S ribosomal protein L7a-1;60S ribosomal protein L7a-2	RPL7A-1;RPL7A-2	34841000	32132000	41418000	30577000	28492000	35746000	3	3	3	11.6	11.6	11.6	29.304	0	22.381	198570000	17	36306000	29497000	45176000	37033000	43446000	7111000	18052000	3300600	2681500	4106900	3366700	3949700	646460	4	4	4	2	3	0	By MS/MS	By MS/MS	By MS/MS	By MS/MS	By MS/MS	By MS/MS
P0DKK9;P0DKK8;Q94DM7	P0DKK9;P0DKK8	40S ribosomal protein S10-2;40S ribosomal protein S10-1	RPS10-2;RPS10-1	72758000	77213000	67961000	111960000	106200000	120990000	5	5	5	34.4	34.4	34.4	20.263	0	40.5	511990000	33	67686000	57482000	60542000	106730000	170940000	48612000	63999000	8460800	7185200	7567800	13341000	21368000	6076500	6	5	6	5	7	4	By MS/MS	By MS/MS	By MS/MS	By MS/MS	By MS/MS	By MS/MS
P0DO03;P0DO02;P0DO01	P0DO03;P0DO02;P0DO01	Chaperone protein dnaJ A8, chloroplastic;Chaperone protein dnaJ A7B, chloroplastic	DJA8;DJA7B	45296000	56616000	84985000	28734000	50856000	89533000	9	9	9	19.9	19.9	19.9	48.214	0	62.258	357210000	30	80631000	78355000	104130000	11134000	53098000	29859000	14884000	3359600	3264800	4338700	463920	2212400	1244100	6	5	12	1	3	3	By MS/MS	By MS/MS	By MS/MS	By MS/MS	By MS/MS	By MS/MS
P12085;A0A0P0XTT3;A0A0P0Y832	P12085;A0A0P0XTT3;A0A0P0Y832	ATP synthase subunit beta, chloroplastic;ATP synthase subunit beta	atpB;Os10g0355800	1340200000	1336900000	1386300000	1922300000	1947400000	1742100000	24	24	20	70.3	70.3	56.2	53.954	0	323.31	9847400000	424	1249300000	1136400000	1484000000	2007900000	3114000000	855700000	351690000	44619000	40587000	53001000	71709000	111210000	30561000	75	72	82	67	82	46	By MS/MS	By MS/MS	By MS/MS	By MS/MS	By MS/MS	By MS/MS
P12139	P12139	50S ribosomal protein L20, chloroplastic	rpl20	17857000	15005000	23952000	0	13219000	0	3	3	3	27.7	27.7	27.7	14.346	0	19	87600000	14	15953000	12933000	22384000	10134000	22693000	3502600	14600000	2658800	2155500	3730700	1689000	3782200	583770	3	2	5	1	2	1	By MS/MS	By MS/MS	By MS/MS	By MS/MS	By MS/MS	By MS/MS
P12149	P12149	30S ribosomal protein S12, chloroplastic	rps12-A	0	0	0	34904000	33155000	27045000	2	2	2	27.4	27.4	27.4	13.82	0	15.991	101860000	7	4427900	2990300	5714100	36025000	42493000	10207000	33953000	1476000	996750	1904700	12008000	14164000	3402500	1	1	1	2	2	0	By MS/MS	By MS/MS	By MS/MS	By MS/MS	By MS/MS	By matching
P12151	P12151	30S ribosomal protein S16, chloroplastic	rps16	0	0	0	0	7263300	0	1	1	1	8.2	8.2	8.2	10.056	0.0082759	5.9405	22014000	5	2039700	1740800	2565500	6241000	9426800	0	5503500	509930	435200	641380	1560300	2356700	0	1	1	1	1	1	0	By MS/MS	By MS/MS	By MS/MS	By MS/MS	By MS/MS
P12153	P12153	30S ribosomal protein S19, chloroplastic	rps19-A	165460000	136900000	111920000	144950000	111550000	123910000	4	4	4	45.2	45.2	45.2	10.695	0	33.369	730250000	35	139310000	97834000	141080000	141310000	154410000	56313000	121710000	23219000	16306000	23513000	23551000	25734000	9385500	7	4	4	7	9	4	By MS/MS	By MS/MS	By MS/MS	By MS/MS	By MS/MS	By MS/MS
P14654	P14654	Glutamine synthetase cytosolic isozyme 1-2	GLN1-2	17842000	19858000	13518000	21404000	13327000	20293000	3	2	2	17.6	10.1	10.1	39.258	0	16.595	94869000	10	17168000	15877000	13424000	23879000	16442000	8077900	6776400	1226300	1134000	958890	1705700	1174500	576990	2	2	2	2	1	1	By MS/MS	By MS/MS	By MS/MS	By MS/MS	By MS/MS	By MS/MS
P14655	P14655	Glutamine synthetase, chloroplastic	GLN2	6404300000	5716500000	4716600000	6127600000	6270700000	5272800000	14	14	13	40.7	40.7	34.3	46.642	0	236.28	34416000000	603	6206300000	5355400000	5514700000	5931800000	8575500000	2831800000	1912000000	344800000	297520000	306370000	329540000	476420000	157320000	124	116	124	71	101	67	By MS/MS	By MS/MS	By MS/MS	By MS/MS	By MS/MS	By MS/MS
P14656	P14656	Glutamine synthetase cytosolic isozyme 1-1	GLN1-1	107250000	79108000	72577000	65711000	59494000	44982000	10	9	7	46.3	38.8	29.8	39.201	0	76.414	429320000	32	85785000	67654000	85942000	64438000	109850000	15646000	28621000	5719000	4510300	5729500	4295900	7323500	1043100	8	5	9	4	6	0	By MS/MS	By MS/MS	By MS/MS	By MS/MS	By MS/MS	By matching
P14717;A0A0P0VLX6;A0A0P0VM36	P14717	Phenylalanine ammonia-lyase	PAL	1329200000	1213700000	1193800000	677960000	962580000	1286500000	26	26	20	45.2	45.2	35.8	75.497	0	297.54	6251500000	319	1325900000	958470000	1281800000	707860000	1410700000	566800000	164510000	34892000	25223000	33732000	18628000	37123000	14916000	79	63	63	34	46	34	By MS/MS	By MS/MS	By MS/MS	By MS/MS	By MS/MS	By MS/MS
P15280;A0A0P0XFB4;A0A0P0XF97;Q69T99	P15280	Glucose-1-phosphate adenylyltransferase small subunit 2, chloroplastic/amyloplastic/cytosolic	AGPS2	34003000	34947000	40124000	30087000	32678000	28145000	7	7	7	18.1	18.1	18.1	56.103	0	45.589	199290000	21	39634000	33934000	46052000	18848000	54990000	5829100	6872000	1366700	1170200	1588000	649930	1896200	201000	4	4	4	4	5	0	By MS/MS	By MS/MS	By MS/MS	By MS/MS	By MS/MS	By matching
P16081;Q6ZC33;A0A0P0XHI7;A0A0P0XGZ0	P16081;Q6ZC33;A0A0P0XHI7;A0A0P0XGZ0	Nitrate reductase [NADH] 1;Nitrate reductase;Os08g0468100 protein (Fragment)	NIA1;Os08g0468700;NA	104750000	94343000	99932000	79751000	119330000	94478000	12	12	12	19.5	19.5	19.5	101.51	0	89.145	549890000	40	88595000	79032000	107480000	63640000	163650000	47494000	10575000	1703700	1519900	2067000	1223800	3147100	913340	12	10	10	3	4	1	By MS/MS	By MS/MS	By MS/MS	By MS/MS	By MS/MS	By MS/MS
P17070	P17070	Proliferating cell nuclear antigen	Os02g0805200	8733100	9050300	6145900	0	0	0	3	3	3	17.5	17.5	17.5	29.271	0	18.306	30804000	4	8255400	7828700	6654000	5573000	0	2492400	2053600	550360	521910	443600	371530	0	166160	1	1	1	1	0	0	By MS/MS	By MS/MS	By MS/MS	By MS/MS		By matching
P17784;Q10A30;Q6YPF1	P17784	Fructose-bisphosphate aldolase 1, cytoplasmic	FBA1	96397000	86696000	83124000	55708000	33621000	52215000	15	5	5	38.5	19.3	19.3	38.863	0	40.388	374510000	40	108090000	83715000	104870000	40507000	20039000	17292000	17834000	5147200	3986400	4993800	1928900	954240	823430	12	8	11	3	4	2	By MS/MS	By MS/MS	By MS/MS	By MS/MS	By MS/MS	By MS/MS
Q2QTJ7;Q2QTJ1;Q0INY7;P18566	Q2QTJ7;Q2QTJ1;Q0INY7;P18566	Ribulose bisphosphate carboxylase small chain;Ribulose bisphosphate carboxylase small chain	LOC_Os12g19394;LOC_Os12g19470	6823200000	6247500000	6159000000	7616900000	9699400000	10577000000	6	6	6	24	24	24	19.498	0	68.821	44135000000	334	6086700000	5236500000	6743300000	7291700000	14672000000	4105500000	3395000000	468210000	402810000	518720000	560900000	1128600000	315810000	72	71	66	36	57	32	By MS/MS	By MS/MS	By MS/MS	By MS/MS	By MS/MS	By MS/MS
P25776;A0A0P0WFN4	P25776;A0A0P0WFN4	Oryzain alpha chain;Os04g0650000 protein (Fragment)	Os04g0650000;Os04g0650000	99392000	95028000	74586000	118650000	86514000	129600000	3	3	3	9.8	9.8	9.8	50.131	0	99.085	532180000	36	72837000	80351000	86420000	126440000	111360000	54783000	35479000	4855800	5356700	5761300	8429200	7423700	3652200	8	6	6	5	6	5	By MS/MS	By MS/MS	By MS/MS	By MS/MS	By MS/MS	By MS/MS
P28752	P28752	Tubulin alpha-1 chain	TUBA1	107140000	94582000	94061000	226130000	225550000	193110000	13	6	5	38.7	18.9	18.9	49.654	0	89.521	968830000	31	93879000	65127000	82004000	149680000	518700000	59438000	48442000	4693900	3256400	4100200	7484100	25935000	2971900	7	5	4	5	7	3	By MS/MS	By MS/MS	By MS/MS	By MS/MS	By MS/MS	By MS/MS
P29545	P29545	Elongation factor 1-beta	Os07g0662500	225650000	231620000	217810000	254920000	199900000	241170000	8	8	8	56.7	56.7	56.7	23.799	0	64.359	1270900000	54	225270000	185900000	230570000	295660000	245070000	88413000	105910000	18773000	15492000	19214000	24638000	20422000	7367800	10	11	12	8	7	6	By MS/MS	By MS/MS	By MS/MS	By MS/MS	By MS/MS	By MS/MS
P30298;A0A0P0WTZ1	P30298;A0A0P0WTZ1	Sucrose synthase 2;Sucrose synthase (Fragment)	SUS2;Os06g0194900	1460300000	1348000000	1273800000	1289300000	1310300000	1436400000	35	35	29	51.6	51.6	44.6	92.128	0	323.31	7783500000	353	1367600000	1090100000	1370500000	1284600000	2111700000	558930000	194590000	34191000	27252000	34262000	32115000	52793000	13973000	73	70	65	46	51	48	By MS/MS	By MS/MS	By MS/MS	By MS/MS	By MS/MS	By MS/MS
Q851P5;P31674	Q851P5;P31674	40S ribosomal protein S15, putative, expressed;40S ribosomal protein S15	OSJNBa0052F07.28;RPS15	43248000	30894000	25823000	0	35923000	46282000	4	4	4	36.4	36.4	36.4	17.328	0	27.713	165790000	21	45513000	24929000	37971000	7199100	32022000	18157000	23684000	6501800	3561200	5424500	1028400	4574600	2593800	6	5	5	1	3	1	By MS/MS	By MS/MS	By MS/MS	By MS/MS	By MS/MS	By MS/MS
P31924;A0A0P0VYH2;A0A0P0VYG9	P31924	Sucrose synthase 1	SUS1	3853300000	3431800000	3526700000	3163700000	3905600000	4046700000	33	27	13	45.2	38.2	23.8	92.907	0	323.31	21367000000	596	3850800000	3071700000	3927400000	3495800000	5535200000	1486600000	534190000	96269000	76794000	98184000	87395000	138380000	37164000	129	126	128	54	97	62	By MS/MS	By MS/MS	By MS/MS	By MS/MS	By MS/MS	By MS/MS
P35681	P35681	Translationally-controlled tumor protein homolog	TCTP	0	0	0	0	0	10448000	1	1	1	5.4	5.4	5.4	18.946	0.0036657	6.2812	47956000	13	5877900	6417000	10185000	9684000	11696000	4096400	5994500	734740	802130	1273100	1210500	1462000	512050	2	2	2	3	2	2	By MS/MS	By MS/MS	By MS/MS	By MS/MS	By MS/MS	By MS/MS
P35683;A0A0N7KMN9;Q6Z2Z4	P35683;A0A0N7KMN9;Q6Z2Z4	Eukaryotic initiation factor 4A-1;Os06g0701100 protein (Fragment)	Os06g0701100;Os06g0701100	262610000	258220000	264830000	344830000	289890000	298760000	17	17	13	47.1	47.1	40.8	47.087	0	186.56	1691400000	95	228730000	183720000	284780000	328740000	562340000	103070000	73539000	9944700	7987800	12382000	14293000	24450000	4481500	13	12	19	17	20	14	By MS/MS	By MS/MS	By MS/MS	By MS/MS	By MS/MS	By MS/MS
Q53JG0;P35684	Q53JG0;P35684	60S ribosomal protein L3, putative, expressed;60S ribosomal protein L3	RPL3B;RPL3	66985000	60529000	77415000	97059000	96163000	89795000	9	9	9	25.4	25.4	25.4	44.49	0	67.71	451890000	55	83942000	66995000	101350000	83682000	85097000	30821000	20540000	3815600	3045200	4606800	3803700	3868100	1400900	11	11	11	9	8	5	By MS/MS	By MS/MS	By MS/MS	By MS/MS	By MS/MS	By MS/MS
P35686	P35686	40S ribosomal protein S20	RPS20	17149000	16164000	17044000	10275000	1193400	0	3	2	2	24.2	18.8	18.8	14.046	0	13.27	61606000	8	14954000	11800000	16000000	14040000	4515900	296760	8800900	2136300	1685700	2285700	2005700	645130	42394	1	1	2	3	1	0	By MS/MS	By MS/MS	By MS/MS	By MS/MS	By MS/MS	By matching
Q7Y199;P35687	Q7Y199;P35687	40S ribosomal protein S21;40S ribosomal protein S21	OSJNBa0039O18.25;RPS21	23554000	23303000	56156000	0	0	16148000	3	3	3	57.3	57.3	57.3	9.2833	0	28.398	106560000	17	23770000	17926000	44059000	8093400	0	12714000	26641000	5942500	4481500	11015000	2023300	0	3178500	2	2	3	2	7	1	By MS/MS	By MS/MS	By MS/MS	By MS/MS	By MS/MS	By MS/MS
P37832;A0A0P0WTH7;CON__ENSEMBL:ENSBTAP00000025008	P37832	Tubulin beta-7 chain	TUBB7	0	0	18865000	0	32961000	0	14	2	2	39.4	6.3	6.3	49.822	0	24.476	137690000	13	28118000	22693000	35014000	8514500	40573000	2781300	6556800	1339000	1080600	1667300	405450	1932000	132440	3	3	2	2	3	0	By MS/MS	By MS/MS	By MS/MS	By MS/MS	By MS/MS	By matching
P40978	P40978	40S ribosomal protein S19	RPS19A	38870000	34875000	63902000	82452000	104980000	87548000	4	4	4	25.3	25.3	25.3	16.387	0	25.536	383520000	20	34670000	26119000	53414000	91021000	140070000	38218000	34865000	3151800	2374500	4855800	8274600	12734000	3474400	2	2	4	5	6	1	By MS/MS	By MS/MS	By MS/MS	By MS/MS	By MS/MS	By MS/MS
P41095;Q2RAW0;Q2QY46;A0A0P0XBD7	P41095;Q2RAW0;Q2QY46	60S acidic ribosomal protein P0;60S acidic ribosomal protein P0	Os08g0130500;LOC_Os11g04070	125810000	133980000	128550000	155040000	128760000	139880000	6	6	6	35.7	35.7	35.7	34.377	0	50.232	749330000	39	123130000	107690000	128510000	154250000	178570000	57181000	74933000	12313000	10769000	12851000	15425000	17857000	5718100	7	8	8	6	6	4	By MS/MS	By MS/MS	By MS/MS	By MS/MS	By MS/MS	By MS/MS
P41344	P41344	Ferredoxin--NADP reductase, leaf isozyme 1, chloroplastic	LFNR1	20035000	19189000	24051000	23260000	12332000	19772000	5	4	4	18	14.6	14.6	40.008	0	27.483	123540000	17	22844000	20805000	31018000	20303000	20741000	7831100	6177100	1142200	1040200	1550900	1015200	1037100	391560	4	3	5	3	1	1	By MS/MS	By MS/MS	By MS/MS	By MS/MS	By MS/MS	By MS/MS
P43279;A0A0P0UZ30	P43279;A0A0P0UZ30	NADP-dependent malic enzyme, chloroplastic;Malic enzyme (Fragment)	ME6;Os01g0188400	13153000	13867000	12589000	0	0	0	3	3	3	7.8	7.8	7.8	69.865	0	21.428	44104000	5	13447000	11691000	12871000	2785100	1896800	1413100	1422700	433760	377120	415200	89841	61186	45584	2	1	2	0	0	0	By MS/MS	By MS/MS	By MS/MS	By matching	By matching	By matching
P45960;Q76FS3	P45960;Q76FS3	Tubulin beta-4 chain;Tubulin beta-6 chain	TUBB4;TUBB6	0	0	0	0	16913000	0	13	1	1	40.3	2.5	2.5	50.289	0.00163	7.532	21951000	1	0	0	0	0	21951000	0	1045300	0	0	0	0	1045300	0	0	0	0	0	1	0	By matching	By matching	By matching	By matching	By MS/MS	By matching
Q5SNC0;P46465	Q5SNC0;P46465	Os06g0173100 protein;26S proteasome regulatory subunit 6A homolog	Os06g0173100;TBP1	16666000	12436000	16685000	18271000	20312000	16320000	4	3	3	15.2	12.4	12.4	47.779	0	27.545	96232000	11	15032000	11532000	15248000	13901000	33657000	6862400	4009700	626310	480520	635320	579220	1402400	285930	2	2	2	2	2	1	By MS/MS	By MS/MS	By MS/MS	By MS/MS	By MS/MS	By MS/MS
P46466;Q8W422;A0A0P0XAP0;A0A0P0VX70	P46466;Q8W422;A0A0P0XAP0	26S proteasome regulatory subunit 4 homolog;26S protease regulatory subunit 4, putative, expressed	TBP2;OsRPT2b	37018000	0	6720800	31201000	24279000	16429000	5	5	5	19.9	19.9	19.9	49.586	0	50.694	129330000	7	16654000	16837000	14264000	11785000	58592000	11200000	4790100	616800	623580	528290	436490	2170100	414830	1	0	1	2	3	0	By MS/MS	By matching	By MS/MS	By MS/MS	By MS/MS	By matching
P48599	P48599	Eukaryotic translation initiation factor 4E-1	Os01g0970400	0	0	0	8073300	0	0	2	2	2	11	11	11	25.465	0	14.26	53384000	4	11173000	11677000	19266000	8005700	0	3261700	5931600	1241500	1297500	2140700	889520	0	362410	1	2	1	0	0	0	By MS/MS	By MS/MS	By MS/MS	By matching		By matching
P48600	P48600	Eukaryotic translation initiation factor isoform 4E-2	Os10g0467600	0	0	0	0	0	2838900	1	1	1	6.3	6.3	6.3	23.199	0.0016194	7.4415	14686000	3	3484700	2702500	3648800	3736800	0	1113100	1468600	348470	270250	364880	373680	0	111310	1	1	1	0	0	0	By MS/MS	By MS/MS	By MS/MS	By matching		By matching
P49027	P49027	Guanine nucleotide-binding protein subunit beta-like protein A	RACK1A	125500000	106200000	61059000	300000000	357250000	108590000	7	7	5	36.8	36.8	31.1	36.231	0	110.1	1072800000	42	110110000	89860000	86135000	286670000	450940000	49095000	59600000	6117000	4992200	4785300	15926000	25052000	2727500	9	8	5	9	8	3	By MS/MS	By MS/MS	By MS/MS	By MS/MS	By MS/MS	By MS/MS
P49199	P49199	40S ribosomal protein S8	RPS8	3246300	3008700	7719600	1907000	0	0	8	2	2	39.5	7.3	7.3	24.829	0	12.852	16920000	4	4212800	2979400	7070600	1428600	1228600	0	1880000	468090	331040	785620	158730	136510	0	1	1	2	0	0	0	By MS/MS	By MS/MS	By MS/MS	By matching	By matching	By matching
P49210;Q0E4R7	P49210;Q0E4R7	60S ribosomal protein L9;Os02g0103700 protein	RPL9;Os02g0103700	85673000	91258000	67477000	129700000	149340000	131560000	9	9	9	55.8	55.8	55.8	21.349	0	84.08	614500000	42	97783000	82954000	77326000	90501000	207610000	58325000	55863000	8889300	7541300	7029600	8227400	18874000	5302200	9	9	7	5	8	4	By MS/MS	By MS/MS	By MS/MS	By MS/MS	By MS/MS	By MS/MS
P49216	P49216	40S ribosomal protein S26	RPS26	0	0	0	0	0	1523500	2	1	1	21.8	15	15	14.991	0.00437	6.2588	14114000	4	2650200	2671400	3377700	1831700	2985700	597360	3528500	662560	667840	844430	457920	746430	149340	1	1	1	1	0	0	By MS/MS	By MS/MS	By MS/MS	By MS/MS	By matching	By matching
P49398;Q5ZBX1;Q0DIR7	P49398;Q5ZBX1	40S ribosomal protein S4;40S ribosomal protein S4	RPS4;Os01g0358400	71312000	70625000	83692000	146420000	113480000	138950000	7	7	7	31.3	31.3	31.3	29.865	0	60.496	586110000	29	47482000	40421000	79489000	145380000	214190000	59144000	36632000	2967600	2526300	4968000	9086500	13387000	3696500	3	2	4	6	9	5	By MS/MS	By MS/MS	By MS/MS	By MS/MS	By MS/MS	By MS/MS
Q9LDC9;Q7XZG0;Q7F270;Q06396;P51823	Q9LDC9;Q7XZG0;Q7F270;Q06396;P51823	Os01g0265100 protein;ADP-ribosylation factor;ADP-ribosylation factor 1	Os01g0265100;LOC_Os03g59740;NA	109490000	108840000	97480000	197480000	188410000	224830000	6	6	6	43.6	43.6	43.6	20.697	0	47.753	878240000	64	93481000	78423000	94876000	222140000	303150000	86163000	87824000	9348100	7842300	9487600	22214000	30315000	8616300	12	11	13	10	14	4	By MS/MS	By MS/MS	By MS/MS	By MS/MS	By MS/MS	By MS/MS
P52428	P52428	Proteasome subunit alpha type-1	PAF1	11501000	12183000	20878000	14122000	21778000	10871000	5	5	5	26.3	26.3	26.3	29.63	0	33.459	90925000	9	13300000	16182000	20903000	11775000	26022000	2742300	6061700	886690	1078800	1393600	784970	1734800	182820	0	1	3	2	2	1	By matching	By MS/MS	By MS/MS	By MS/MS	By MS/MS	By MS/MS
P55857;Q8RZU9	P55857;Q8RZU9	Small ubiquitin-related modifier 1;Small ubiquitin-related modifier	SUMO1;Os01g0918200	19653000	16980000	23094000	0	16020000	14145000	3	3	3	33	33	33	10.928	0	18.747	82122000	6	25218000	17314000	14216000	0	19234000	6140400	13687000	4203000	2885700	2369300	0	3205600	1023400	2	0	3	0	1	0	By MS/MS	By matching	By MS/MS		By MS/MS	By matching
Q5NB69;P56724	Q5NB69;P56724	Os01g0231700 protein;60S acidic ribosomal protein P3	Os01g0231700;Os06g0701400	0	0	0	0	0	11895000	1	1	1	12.6	12.6	12.6	11.876	0.00085911	8.4231	70753000	8	12496000	10569000	10667000	21450000	10908000	4663900	17688000	3124000	2642300	2666700	5362400	2726900	1166000	2	2	1	2	1	0	By MS/MS	By MS/MS	By MS/MS	By MS/MS	By MS/MS	By matching
P93431;A0A0P0Y677;A0A0P0Y5U3;Q7XN85	P93431;A0A0P0Y677	Ribulose bisphosphate carboxylase/oxygenase activase, chloroplastic;Os11g0707000 protein (Fragment)	RCA;Os11g0707000	4896700000	5735900000	4635800000	8793200000	7289200000	7481300000	17	17	17	57.3	57.3	57.3	51.454	0	323.31	42230000000	813	6651900000	6454600000	6482900000	9168700000	10754000000	2717500000	1836100000	289210000	280640000	281860000	398640000	467580000	118150000	151	170	165	120	119	88	By MS/MS	By MS/MS	By MS/MS	By MS/MS	By MS/MS	By MS/MS
P93438;A0A0P0X5U4	P93438	S-adenosylmethionine synthase 2	SAM2	222050000	305600000	204790000	204950000	130390000	178520000	16	6	5	65.5	23.9	20.3	42.9	0	130.33	1188500000	78	268910000	257530000	273620000	191420000	123100000	73900000	62552000	14153000	13554000	14401000	10075000	6478800	3889500	18	18	20	9	7	6	By MS/MS	By MS/MS	By MS/MS	By MS/MS	By MS/MS	By MS/MS
P93844	P93844	Phospholipase D alpha 2	PLD2	4448600	3934900	7153600	0	0	0	3	2	2	4.3	2.9	2.9	91.318	0.00091743	11.696	17263000	2	4873300	3186400	7269100	0	0	1934600	367310	103690	67796	154660	0	0	41161	0	0	2	0	0	0	By matching	By matching	By MS/MS	By matching	By matching	By matching
Q01859;A0A0P0WQ12	Q01859;A0A0P0WQ12	ATP synthase subunit beta, mitochondrial;Os05g0553000 protein (Fragment)	ATPB;Os05g0553000	738850000	758530000	684240000	672470000	720000000	720560000	20	19	3	54.9	52.9	8.2	58.933	0	323.31	4153500000	190	697220000	605620000	671590000	678730000	1188000000	312280000	138450000	23241000	20187000	22386000	22624000	39602000	10409000	45	46	40	20	24	15	By MS/MS	By MS/MS	By MS/MS	By MS/MS	By MS/MS	By MS/MS
Q06967;Q5QNB8	Q06967	14-3-3-like protein GF14-F	GF14F	417330000	470560000	420380000	309360000	258450000	351370000	13	13	7	59.6	59.6	40	29.177	0	104.23	2140200000	160	394630000	356620000	481040000	314150000	432360000	161360000	125890000	23214000	20978000	28296000	18480000	25433000	9491600	31	32	35	22	24	16	By MS/MS	By MS/MS	By MS/MS	By MS/MS	By MS/MS	By MS/MS
Q07078;A0A0P0XNB2	Q07078;A0A0P0XNB2	Heat shock protein 81-3;Os09g0482400 protein (Fragment)	HSP81-3;Os09g0482400	716720000	728730000	790500000	937740000	775890000	713980000	25	25	1	40.5	40.5	2.1	80.183	0	231.07	4444600000	252	754560000	626640000	914520000	863890000	993260000	291760000	130720000	22193000	18431000	26898000	25409000	29214000	8581100	54	42	53	39	37	27	By MS/MS	By MS/MS	By MS/MS	By MS/MS	By MS/MS	By MS/MS
Q07661	Q07661	Nucleoside diphosphate kinase 1	NDKR	10404000	10332000	14038000	0	0	7608600	2	2	2	12.8	12.8	12.8	16.861	0	12.346	44822000	5	11330000	9324900	13762000	1708500	5991200	2705400	4482200	1133000	932490	1376200	170850	599120	270540	1	1	2	0	1	0	By MS/MS	By MS/MS	By MS/MS	By matching	By MS/MS	By matching
Q08480	Q08480	Adenylate kinase 4	ADK-B	0	0	5373700	0	0	0	1	1	1	6.2	6.2	6.2	26.675	0.00082508	7.7437	16964000	3	5705000	5537900	5720600	0	0	0	1130900	380330	369200	381370	0	0	0	1	1	1	0	0	0	By MS/MS	By MS/MS	By MS/MS
Q0D3V0;A0A0P0X8K6;A0A0P0X9T1	Q0D3V0;A0A0P0X8K6;A0A0P0X9T1	Os07g0664400 protein;Os07g0592100 protein (Fragment)	Os07g0664400;Os07g0592100	0	0	0	0	0	12607000	2	1	1	9.4	5.7	5.7	31.114	0.00085034	8.1938	76454000	10	17641000	15281000	16728000	10593000	11269000	4942900	5096900	1176100	1018700	1115200	706170	751250	329520	2	2	3	1	1	1	By MS/MS	By MS/MS	By MS/MS	By MS/MS	By MS/MS	By MS/MS
Q0D3Z9;A0A0P0X9L7;A0A0P0XA19	Q0D3Z9	Os07g0657200 protein	Os07g0657200	17038000	20344000	17555000	17995000	24199000	19624000	4	4	4	5.3	5.3	5.3	121.75	0	29.72	106430000	15	21903000	20771000	23026000	7003300	25207000	8522000	2475200	509370	483040	535490	162870	586220	198190	3	4	5	1	2	0	By MS/MS	By MS/MS	By MS/MS	By MS/MS	By MS/MS	By matching
Q0D4J5;Q75W16;A0A0P0VY65;A0A0P0VY68;Q336R7	Q0D4J5;Q75W16	Phospho-2-dehydro-3-deoxyheptonate aldolase;Phospho-2-dehydro-3-deoxyheptonate aldolase 2, chloroplastic	Os07g0622200;DAHPS2	123610000	126510000	138790000	92522000	82895000	88313000	11	9	5	25.9	20.7	13.2	59.078	0	63.261	610260000	54	130810000	100880000	149170000	81363000	111140000	36900000	21043000	4510700	3478600	5143700	2805600	3832500	1272400	12	10	14	9	7	2	By MS/MS	By MS/MS	By MS/MS	By MS/MS	By MS/MS	By MS/MS
Q0D4M5	Q0D4M5	Os07g0617800 protein	Os07g0617800	0	0	0	0	0	6110000	1	1	1	6.4	6.4	6.4	36.443	0.0016221	7.4505	36448000	3	5692500	5158100	5396100	7118300	10687000	2395700	2278000	355780	322380	337260	444890	667920	149730	1	1	1	0	0	0	By MS/MS	By MS/MS	By MS/MS	By matching	By matching	By matching
Q0D529;A0A0P0X8K2	Q0D529	Os07g0586500 protein	Os07g0586500	12286000	15240000	21806000	16505000	30025000	14259000	4	4	4	12.3	12.3	12.3	45.353	0	27.069	105030000	7	13125000	18119000	29157000	17924000	21567000	5138200	4039600	504790	696880	1121400	689400	829510	197620	0	2	2	1	2	0	By matching	By MS/MS	By MS/MS	By MS/MS	By MS/MS	By matching
Q0D5I5;Q6Z413	Q0D5I5;Q6Z413	Os07g0558300 protein;Os07g0558200 protein	Os07g0558300;Os07g0558200	10719000	0	9306100	0	0	0	2	2	2	11.1	11.1	11.1	47.421	0.00089206	10.972	29293000	2	10049000	8624600	10620000	0	0	0	1331500	456780	392030	482710	0	0	0	1	0	1	0	0	0	By MS/MS	By matching	By MS/MS
Q0D5P8	Q0D5P8	Oxygen-evolving enhancer protein 3, chloroplastic	Os07g0544800	389870000	352810000	506720000	735690000	683380000	656300000	8	8	8	40.6	40.6	40.6	22.981	0	102.67	3162200000	90	399960000	315810000	527920000	643160000	1024100000	251210000	316220000	39996000	31581000	52792000	64316000	102410000	25121000	17	14	23	9	18	9	By MS/MS	By MS/MS	By MS/MS	By MS/MS	By MS/MS	By MS/MS
Q0D5W6	Q0D5W6	Protein translation factor SUI1 homolog	GOS2	11017000	0	0	0	0	0	2	1	1	19.1	11.3	11.3	12.731	0.0055983	5.9988	11017000	1	11017000	0	0	0	0	0	2754200	2754200	0	0	0	0	0	1	0	0	0	0	0	By MS/MS	By matching	By matching	By matching	By matching	By matching
Q0D673	Q0D673	Probable protein phosphatase 2C 62	Os07g0507000	51433000	38213000	56163000	24934000	23444000	26159000	7	7	7	26.2	26.2	26.2	31.74	0	45.405	192090000	21	47626000	36353000	55659000	12777000	16667000	23008000	11299000	2801500	2138400	3274000	751610	980400	1353400	6	5	7	1	2	0	By MS/MS	By MS/MS	By MS/MS	By MS/MS	By MS/MS	By matching
Q0D6B1;A0A0P0X661;A0A0P0X6Q1	Q0D6B1;A0A0P0X661;A0A0P0X6Q1	Os07g0495900 protein (Fragment);Os07g0495900 protein (Fragment)	Os07g0495900;Os07g0495900	14354000	16592000	14478000	0	0	0	2	2	2	3.1	3.1	3.1	123.49	0	12.966	46478000	4	12629000	15399000	15180000	0	0	3270500	815400	221550	270150	266320	0	0	57377	1	1	2	0	0	0	By MS/MS	By MS/MS	By MS/MS			By matching
Q0D6I0	Q0D6I0	Os07g0477500 protein	Os07g0477500	0	0	0	0	0	2044000	1	1	1	1.8	1.8	1.8	89.693	0.00083056	7.8312	16291000	0	4324500	2669400	3302700	3055200	2137700	801420	387880	102960	63558	78636	72744	50898	19081	0	0	0	0	0	0	By MS/MS	By MS/MS	By MS/MS	By MS/MS	By matching	By matching
Q0D6L9	Q0D6L9	Os07g0467200 protein	Os07g0467200	208850000	213460000	245630000	176130000	47197000	0	3	3	3	33.9	33.9	33.9	11.405	0	26.481	905030000	27	206500000	174320000	239130000	149510000	129170000	6386500	113130000	25813000	21790000	29891000	18689000	16147000	798310	6	7	4	4	3	3	By MS/MS	By MS/MS	By MS/MS	By MS/MS	By MS/MS	By MS/MS
Q0D730	Q0D730	Os07g0405100 protein	Os07g0405100	0	0	0	0	0	4242000	1	1	1	2.3	2.3	2.3	62.141	0.0029873	6.477	6862500	4	2164400	2003700	1031200	0	0	1663200	311930	98381	91077	46872	0	0	75601	2	2	0	0	0	0	By MS/MS	By MS/MS	By matching			By matching
Q0D7H8	Q0D7H8	Os07g0245100 protein (Fragment)	Os07g0245100	41509000	36586000	37176000	0	19601000	27498000	3	3	3	22	22	22	20.201	0	25.793	160230000	17	41168000	30807000	39747000	13485000	23905000	11121000	16023000	4116800	3080700	3974700	1348500	2390500	1112100	4	2	4	2	2	3	By MS/MS	By MS/MS	By MS/MS	By MS/MS	By MS/MS	By MS/MS
Q0D867;Q69WE5;A0A0P0X383;A0A0P0X347;Q84R73	Q0D867;Q69WE5;A0A0P0X383;A0A0P0X347	Pyruvate kinase (Fragment);Pyruvate kinase;Pyruvate kinase (Fragment)	Os07g0181000;OJ1014_E09.29-2;NA	58162000	52350000	58824000	48942000	36619000	42664000	11	11	11	26.7	26.7	26.7	62.438	0	72.838	288990000	39	58591000	39876000	66748000	66506000	42592000	14678000	9031000	1831000	1246100	2085900	2078300	1331000	458690	9	11	11	4	4	0	By MS/MS	By MS/MS	By MS/MS	By MS/MS	By MS/MS	By matching
Q0D8E4	Q0D8E4	Os07g0165000 protein (Fragment)	Os07g0165000	11991000	0	0	0	50329000	22473000	2	2	2	7.2	7.2	7.2	42.434	0	20.389	112240000	7	13167000	10838000	11497000	4353500	63474000	8908100	5611900	658350	541910	574840	217680	3173700	445410	1	1	1	1	2	1	By MS/MS	By MS/MS	By MS/MS	By MS/MS	By MS/MS	By MS/MS
Q0D8F6	Q0D8F6	Os07g0163500 protein (Fragment)	Os07g0163500	0	0	0	9085000	11125000	0	5	5	5	17.6	17.6	17.6	36.024	0	33.413	39720000	7	4442200	4230200	5916000	4455800	20398000	278200	2090600	233800	222640	311370	234510	1073600	14642	1	1	1	0	4	0	By MS/MS	By MS/MS	By MS/MS	By matching	By MS/MS	By matching
Q0D8L5	Q0D8L5	Os07g0148800 protein (Fragment)	Os07g0148800	0	0	0	0	9215600	0	2	2	2	8	8	8	42.569	0	12.526	32872000	1	6924600	4289400	8376400	0	11961000	1321200	1429200	301070	186490	364190	0	520030	57443	0	0	1	0	0	0	By MS/MS	By matching	By MS/MS		By matching	By matching
Q0D9C4	Q0D9C4	Catalase isozyme B	CATB	97187000	90596000	109240000	87045000	73605000	64875000	13	9	9	29.3	21.5	21.5	56.586	0	74.987	497810000	68	90630000	75700000	106580000	108940000	92013000	23948000	20742000	3776300	3154200	4440900	4539300	3833900	997840	16	15	17	6	8	6	By MS/MS	By MS/MS	By MS/MS	By MS/MS	By MS/MS	By MS/MS
Q0DA00	Q0DA00	T-complex protein 1 subunit eta (Fragment)	Os06g0687700	65474000	58628000	71029000	39095000	35294000	34458000	5	5	5	23.8	23.8	23.8	32.373	0	54.723	307430000	30	35072000	50987000	68533000	50211000	88642000	13985000	21959000	2505200	3641900	4895200	3586500	6331500	998910	8	8	6	2	5	1	By MS/MS	By MS/MS	By MS/MS	By MS/MS	By MS/MS	By MS/MS
Q0DB62;Q6Z6C8	Q0DB62	Os06g0598900 protein	Os06g0598900	81903000	81415000	95428000	62361000	58870000	66644000	8	8	8	30.4	30.4	30.4	37.263	0	56.92	420660000	50	84318000	70125000	112700000	64535000	66719000	22259000	20031000	4015100	3339300	5366800	3073100	3177100	1060000	12	11	15	7	5	0	By MS/MS	By MS/MS	By MS/MS	By MS/MS	By MS/MS	By matching
Q0DBD3	Q0DBD3	Serine/threonine-protein phosphatase PP2A-1 catalytic subunit	PP2A1	0	0	5778800	0	0	0	4	2	0	14.4	6.9	0	35.113	0	13.622	6151900	2	0	0	6151900	0	0	0	384500	0	0	384500	0	0	0	0	0	1	0	1	0	By matching	By matching	By MS/MS	By matching	By MS/MS	By matching
Q0DBK8;Q6H541;Q8W0C2	Q0DBK8;Q6H541;Q8W0C2	40S ribosomal protein S24 (Fragment);40S ribosomal protein S24	Os06g0555400;Os02g0229000	23675000	24738000	34872000	42551000	53008000	93970000	2	2	2	22.6	22.6	22.6	13.13	0	14.353	240920000	9	16703000	16883000	26081000	56021000	92477000	32756000	60230000	4175800	4220700	6520100	14005000	23119000	8189000	1	1	3	1	1	2	By MS/MS	By MS/MS	By MS/MS	By MS/MS	By MS/MS	By MS/MS
Q0DCI1;Q84QT9;A0A0P0XL64	Q0DCI1	Pyrophosphate--fructose 6-phosphate 1-phosphotransferase subunit alpha	PFP-ALPHA	206550000	219240000	213800000	177130000	113190000	143760000	15	11	11	31.2	24.3	24.3	67.558	0	85.485	1007900000	65	217440000	166070000	238440000	146830000	182880000	56216000	32512000	7014300	5357000	7691700	4736400	5899500	1813400	13	14	18	7	11	2	By MS/MS	By MS/MS	By MS/MS	By MS/MS	By MS/MS	By MS/MS
Q0DEU8;A0A0P0WSQ4	Q0DEU8	Os06g0133800 protein (Fragment)	Os06g0133800	1608700000	1542200000	1494800000	1692000000	1259300000	1649600000	22	22	22	47.8	47.8	47.8	73.448	0	258.45	8647700000	371	1602900000	1375300000	1694000000	1327000000	2033200000	615310000	298200000	55271000	47424000	58414000	45760000	70112000	21218000	77	73	78	48	56	39	By MS/MS	By MS/MS	By MS/MS	By MS/MS	By MS/MS	By MS/MS
Q0DEV8	Q0DEV8	Os06g0132400 protein (Fragment)	Os06g0132400	8793200	0	9996500	17174000	0	0	2	2	2	16.5	16.5	16.5	12.532	0	13.553	43123000	5	8798700	3116700	11688000	16050000	1433500	2036500	4791500	977630	346300	1298600	1783400	159280	226280	0	1	1	2	1	0	By matching	By MS/MS	By MS/MS	By MS/MS	By MS/MS	By matching
Q0DF00	Q0DF00	Os06g0126500 protein	Os06g0126500	17185000	17566000	22090000	0	0	0	4	4	4	14.5	14.5	14.5	36.431	0	23.797	81175000	5	15756000	18942000	19464000	10677000	13226000	3109200	5073400	984760	1183900	1216500	667310	826600	194330	1	2	2	0	0	0	By MS/MS	By MS/MS	By MS/MS	By MS/MS	By matching	By matching
Q0DF86	Q0DF86	Os06g0109000 protein	Os06g0109000	180030000	183330000	178100000	72350000	80911000	110730000	11	11	11	44.1	44.1	44.1	41.442	0	107.33	723840000	84	168500000	150760000	210640000	61758000	79663000	52521000	36192000	8425200	7537800	10532000	3087900	3983100	2626000	21	19	19	7	10	8	By MS/MS	By MS/MS	By MS/MS	By MS/MS	By MS/MS	By MS/MS
Q0DFC9	Q0DFC9	Plastocyanin, chloroplastic	PETE	75193000	51327000	51815000	53841000	42359000	47989000	2	2	2	20.8	20.8	20.8	15.577	0	17.694	298270000	27	76056000	41917000	54816000	52351000	53247000	19879000	99422000	25352000	13972000	18272000	17450000	17749000	6626400	8	6	7	3	3	0	By MS/MS	By MS/MS	By MS/MS	By MS/MS	By MS/MS	By matching
Q0DFG2	Q0DFG2	Os05g0592600 protein	Os05g0592600	0	0	0	8792800	6818900	0	2	2	2	2.1	2.1	2.1	134.58	0	13.487	29034000	5	3574300	3062800	3623600	8756900	8800700	1215800	558350	68737	58899	69685	168400	169240	23380	1	1	1	1	1	0	By MS/MS	By MS/MS	By MS/MS	By MS/MS	By MS/MS	By matching
Q0DFL5;A0A0P0WQE8	Q0DFL5;A0A0P0WQE8	Os05g0583100 protein (Fragment);Os05g0583100 protein (Fragment)	Os05g0583100;Os05g0583100	0	0	9295300	0	0	0	6	1	1	19	4	4	53.244	0.0016129	7.3877	29848000	3	10798000	9154400	9895500	0	0	0	1492400	539900	457720	494770	0	0	0	1	1	1	0	0	0	By MS/MS	By MS/MS	By MS/MS	By matching	By matching	By matching
Q0DFR3	Q0DFR3	Os05g0575300 protein (Fragment)	Os05g0575300	28942000	34539000	26338000	36103000	0	30590000	5	5	5	12.9	12.9	12.9	59.592	0	34.5	144700000	11	35738000	38259000	36621000	18554000	7057700	8473400	6029300	1489100	1594100	1525900	773070	294070	353060	3	3	2	1	1	1	By MS/MS	By MS/MS	By MS/MS	By MS/MS	By MS/MS	By MS/MS
Q0DG27	Q0DG27	Os05g0556700 protein (Fragment)	Os05g0556700	0	0	0	0	8156600	0	10	5	5	43.9	24.1	24.1	35.756	0	31.335	32863000	5	7465100	8104300	4892900	0	10586000	1814100	1729600	392900	426540	257520	0	557170	95479	2	0	1	0	2	0	By MS/MS	By matching	By MS/MS	By matching	By MS/MS	By matching
Q0DGB3	Q0DGB3	Os05g0542600 protein	Os05g0542600	0	0	0	0	6389900	0	2	2	2	8.1	8.1	8.1	46.815	0	12.456	18843000	3	4873400	4195900	1479900	0	8293300	0	1108400	286670	246820	87055	0	487840	0	1	1	0	0	1	0	By MS/MS	By MS/MS	By matching		By MS/MS
Q0DGW8	Q0DGW8	Os05g0507300 protein (Fragment)	Os05g0507300	19890000	28406000	33559000	24715000	19240000	21875000	4	3	3	15.2	12.7	12.7	42.842	0	16.579	137520000	6	22892000	24432000	34783000	23690000	23643000	8077900	6250900	1040600	1110600	1581100	1076800	1074700	367180	1	1	2	1	1	0	By MS/MS	By MS/MS	By MS/MS	By MS/MS	By MS/MS	By matching
Q0DHB9	Q0DHB9	40S ribosomal protein S26	Os05g0477300	41434000	46093000	51033000	28426000	26689000	29085000	2	2	1	23.5	23.5	16.9	15.161	0	13.583	208710000	12	42184000	41889000	49050000	30623000	34174000	10789000	52177000	10546000	10472000	12263000	7655700	8543500	2697300	2	2	3	0	4	1	By MS/MS	By MS/MS	By MS/MS	By matching	By MS/MS	By MS/MS
Q0DHV7	Q0DHV7	Os05g0437300 protein	Os05g0437300	8430600	10369000	7376400	18065000	0	16196000	4	4	4	12.4	12.4	12.4	49.754	0	24.488	55606000	7	10624000	9003300	10251000	15061000	5115900	5551300	2316900	442650	375140	427130	627550	213160	231300	1	0	3	1	2	0	By MS/MS	By MS/MS	By MS/MS	By MS/MS	By MS/MS	By matching
Q0DJ99;Q0DJA0;C7J5K7;P49661	Q0DJ99;Q0DJA0;C7J5K7	Coatomer subunit delta-2;Coatomer subunit delta-1;Coatomer subunit delta	Os05g0311000;Os05g0310800;NA	13831000	15828000	16767000	15204000	0	29702000	3	3	3	5.5	5.5	5.5	57.502	0	18.126	87415000	11	16431000	15595000	21069000	14703000	11184000	8434300	4162600	782420	742630	1003300	700130	532550	401640	3	2	2	1	1	2	By MS/MS	By MS/MS	By MS/MS	By MS/MS	By MS/MS	By MS/MS
Q0DJB9	Q0DJB9	Os05g0303000 protein (Fragment)	Os05g0303000	70412000	70612000	108080000	69903000	61621000	59827000	11	8	8	25.9	21.1	21.1	48.648	0	60.466	417490000	34	69482000	71960000	116820000	62641000	75515000	21063000	21973000	3656900	3787400	6148700	3296900	3974500	1108600	6	8	10	4	4	2	By MS/MS	By MS/MS	By MS/MS	By MS/MS	By MS/MS	By MS/MS
Q0DJU1	Q0DJU1	Eukaryotic translation initiation factor 3 subunit L	Os05g0227700	0	0	0	0	1187600	0	1	1	1	1.7	1.7	1.7	61.328	0.0082588	5.9393	16111000	2	4628800	4401900	5538900	0	1541400	0	575390	165310	157210	197820	0	55049	0	1	1	0	0	0	0	By MS/MS	By MS/MS	By matching		By matching
Q0DKA5	Q0DKA5	Acyl transferase 7	AT7	0	0	0	0	0	0	1	1	1	2.5	2.5	2.5	47.159	0.0029564	6.4056	0	1	0	0	0	0	0	0	0	0	0	0	0	0	0	0	0	1	0	0	0			By MS/MS
Q0DKF0;A0A0P0WIJ3;Q0ITS8	Q0DKF0;A0A0P0WIJ3;Q0ITS8	60S ribosomal protein L10-2;Os05g0169100 protein (Fragment)	SG12;Os05g0169100	45963000	52000000	50678000	59401000	60631000	42331000	4	4	4	17.8	17.8	17.8	24.672	0	28.499	327420000	22	37570000	30703000	41797000	24002000	179850000	13503000	32742000	3757000	3070300	4179700	2400200	17985000	1350300	6	4	5	2	4	1	By MS/MS	By MS/MS	By MS/MS	By MS/MS	By MS/MS	By MS/MS
Q0DKM4	Q0DKM4	U1 small nuclear ribonucleoprotein A	Os05g0154800	21332000	20858000	12989000	0	0	37511000	4	4	4	23.3	23.3	23.3	28.203	0	26.585	94300000	7	19889000	15809000	16155000	12118000	15195000	15133000	13471000	2841300	2258500	2307900	1731100	2170800	2161900	2	1	2	0	2	0	By MS/MS	By MS/MS	By MS/MS	By matching	By MS/MS	By matching
Q0DKY4;Q8LRJ3	Q0DKY4	S-adenosylmethionine synthase 1	SAM1	1203200000	1244300000	918030000	1245800000	903500000	1207100000	17	17	5	60.4	60.4	14.9	43.219	0	220.3	6091300000	242	1306000000	1069200000	1332900000	975260000	852010000	555970000	304570000	65298000	53461000	66645000	48763000	42600000	27799000	54	52	45	34	28	29	By MS/MS	By MS/MS	By MS/MS	By MS/MS	By MS/MS	By MS/MS
Q0DLP8;Q851X3	Q0DLP8;Q851X3	Os03g0852700 protein (Fragment);Os03g0852700 protein	Os03g0852700;LOC_Os03g63560	0	0	0	0	0	9855800000	1	1	1	2.2	2.2	2.2	57.285	0.0015349	6.809	15811000000	129	0	0	0	5123300000	6732400000	3955400000	545210000	0	0	0	176660000	232150000	136390000	0	0	0	36	54	39				By MS/MS	By MS/MS	By MS/MS
Q0DM18	Q0DM18	Os03g0833100 protein	Os03g0833100	0	0	0	0	0	3611100	1	1	1	6.4	6.4	6.4	26.404	0.00084104	8.012	20852000	4	5135200	3573400	4600600	3250700	2876000	1415900	2606500	641900	446680	575070	406330	359500	176990	1	1	1	0	1	0	By MS/MS	By MS/MS	By MS/MS	By matching	By MS/MS	By matching
Q0DM51;A0A0P0W5N0	Q0DM51;A0A0P0W5N0	DEAD-box ATP-dependent RNA helicase 3, chloroplastic;Os03g0827700 protein (Fragment)	Os03g0827700;Os03g0827700	15946000	12402000	0	17015000	30160000	26053000	6	6	6	13.7	13.7	13.7	81.614	0	42.395	102340000	11	9286000	11902000	9326800	16146000	44635000	11048000	2842900	257950	330610	259080	448510	1239900	306880	3	2	1	2	2	1	By MS/MS	By MS/MS	By MS/MS	By MS/MS	By MS/MS	By MS/MS
Q0DP29	Q0DP29	Os03g0719500 protein (Fragment)	Os03g0719500	0	0	0	0	10181000	0	1	1	1	2.5	2.5	2.5	76.044	0.0015649	7.0055	13213000	0	0	0	0	0	13213000	0	388630	0	0	0	0	388630	0	0	0	0	0	0	0					By MS/MS
Q0DRB3	Q0DRB3	Os03g0399800 protein (Fragment)	Os03g0399800	218130000	199030000	196530000	139720000	55465000	79463000	6	6	6	50.8	50.8	50.8	20.837	0	70.727	837450000	48	185170000	155750000	194730000	173230000	87672000	40895000	104680000	23146000	19469000	24341000	21654000	10959000	5111900	11	10	11	6	6	4	By MS/MS	By MS/MS	By MS/MS	By MS/MS	By MS/MS	By MS/MS
Q0DRT9	Q0DRT9	Os03g0355600 protein (Fragment)	Os03g0355600	7252700	7234600	7802800	0	0	5579700	2	2	2	2.6	2.6	2.6	98.832	0.00090909	11.313	32871000	3	7916200	6390600	7119900	2461200	6798200	2185100	764450	184100	148620	165580	57236	158100	50817	1	0	2	0	0	0	By MS/MS	By matching	By MS/MS	By matching	By matching	By matching
Q0DRW2;Q10LH5;Q10LH4	Q0DRW2;Q10LH5;Q10LH4	Os03g0350100 protein (Fragment);Nucleolar protein NOP5, putative, expressed	Os03g0350100;LOC_Os03g22730	0	0	0	0	0	5764800	1	1	1	3.4	3.4	3.4	61.007	0.0050432	6.1636	18788000	1	2640200	1439700	1882500	5567600	4997900	2260300	722630	101550	55375	72404	214140	192230	86934	0	0	0	1	0	0	By matching	By matching	By matching	By MS/MS	By matching	By matching
Q0DSD6;A0A0P0VWS3	Q0DSD6	Os03g0315800 protein (Fragment)	Os03g0315800	94371000	101810000	101710000	125100000	76782000	106340000	6	6	6	16.9	16.9	16.9	41.925	0	46.6	557360000	35	101120000	85334000	103720000	125330000	96196000	45653000	32786000	5948300	5019700	6101500	7372300	5658600	2685500	6	9	6	4	7	3	By MS/MS	By MS/MS	By MS/MS	By MS/MS	By MS/MS	By MS/MS
Q0DWC5	Q0DWC5	Os02g0821200 protein (Fragment)	Os02g0821200	9303200	10533000	11620000	12553000	13919000	12431000	3	2	0	31.5	20.7	0	10.245	0	12.257	64989000	3	7268100	7927100	12176000	15466000	16844000	5307000	21663000	2422700	2642400	4058800	5155200	5614800	1769000	0	0	0	1	2	0	By matching	By matching	By matching	By MS/MS	By MS/MS	By matching
Q0DWH1	Q0DWH1	Alcohol dehydrogenase class-3	Os02g0815500	83911000	98442000	96016000	49918000	65661000	51404000	9	9	9	26.5	26.5	26.5	40.822	0	58.858	421340000	24	109820000	78790000	114150000	45602000	52665000	20310000	21067000	5491200	3939500	5707400	2280100	2633300	1015500	5	7	7	1	4	0	By MS/MS	By MS/MS	By MS/MS	By MS/MS	By MS/MS	By MS/MS
Q0DXL7	Q0DXL7	Os02g0745000 protein (Fragment)	Os02g0745000	0	0	0	0	8011600	0	2	2	2	11	11	11	29.316	0	13.605	16777000	2	2019100	1678800	2681200	0	10398000	0	1198400	144220	119910	191520	0	742720	0	0	0	1	0	1	0	By matching	By matching	By MS/MS		By MS/MS
Q0DXM0;Q6Z2T8;A0A0P0VPK3	Q0DXM0;Q6Z2T8;A0A0P0VPK3	Starch synthase, chloroplastic/amyloplastic (Fragment);Soluble starch synthase 2-2, chloroplastic/amyloplastic	Os02g0744700;SSII-2	8148000	8016100	14004000	7612300	6302400	7466100	2	2	2	5.9	5.9	5.9	74.15	0	14.512	47806000	4	7579700	6163700	10582000	9540300	10431000	3509900	1406100	222930	181290	311230	280600	306800	103230	0	0	2	1	1	0	By matching	By matching	By MS/MS	By MS/MS	By MS/MS	By matching
Q0DZE0	Q0DZE0	Phenylalanine ammonia-lyase	ZB8	0	0	4225800	0	0	0	10	2	1	19.5	3.8	1.8	76.98	0	12.858	15560000	2	6385800	4675500	4498600	0	0	0	389000	159650	116890	112460	0	0	0	0	0	2	0	0	0	By MS/MS	By MS/MS	By MS/MS	By matching	By matching	By matching
Q0DZN5	Q0DZN5	Os02g0608600 protein (Fragment)	Os02g0608600	0	0	8261700	0	0	0	3	3	3	9.4	9.4	9.4	37.422	0	20.048	45296000	3	7427200	7361200	8795100	15414000	1132100	5166100	2831000	464200	460070	549700	963370	70757	322880	1	1	1	0	0	0	By MS/MS	By MS/MS	By MS/MS	By MS/MS	By matching	By matching
Q0E0P0	Q0E0P0	Beta-fructofuranosidase, insoluble isoenzyme 1	CIN1	30101000	37406000	28415000	21395000	20854000	20520000	5	5	3	12	12	8.3	63.983	0	31.038	153850000	9	36175000	29391000	34998000	15304000	32612000	5372000	4963000	1166900	948090	1129000	493680	1052000	173290	2	3	2	0	2	0	By MS/MS	By MS/MS	By MS/MS	By matching	By MS/MS	By matching
Q0E2A9	Q0E2A9	Os02g0255700 protein	Os02g0255700	74891000	75130000	92390000	81708000	50190000	81200000	8	8	7	19.1	19.1	17.7	68.567	0	63.768	430650000	36	69188000	64011000	97439000	80893000	87610000	31512000	17226000	2767500	2560400	3897600	3235700	3504400	1260500	7	8	11	3	6	1	By MS/MS	By MS/MS	By MS/MS	By MS/MS	By MS/MS	By MS/MS
Q0E446;A3A2Y2	Q0E446	Os02g0137200 protein (Fragment)	Os02g0137200	112510000	107820000	79896000	149140000	91970000	120440000	6	6	6	33.6	33.6	33.6	29.487	0	58.735	616470000	30	104650000	80330000	106250000	143490000	137420000	44328000	44033000	7475000	5737800	7589400	10249000	9815600	3166300	5	4	4	6	8	3	By MS/MS	By MS/MS	By MS/MS	By MS/MS	By MS/MS	By MS/MS
Q6Z718;Q0E4D9	Q6Z718;Q0E4D9	Os02g0123500 protein;Os02g0123500 protein	P0575F10.14;Os02g0123500	6672900	6554500	8071000	0	32580000	0	3	3	3	11.6	11.6	11.6	35.41	0	21.468	64178000	14	10107000	7999600	12466000	2347100	29115000	2143900	4584200	721930	571400	890410	167650	2079600	153140	3	3	4	2	2	0	By MS/MS	By MS/MS	By MS/MS	By MS/MS	By MS/MS	By matching
Q0E4G1	Q0E4G1	Os02g0120900 protein	Os02g0120900	10563000	10421000	9761500	0	0	0	3	3	3	12.9	12.9	12.9	39.358	0	20.095	37977000	3	10811000	8688100	10088000	6796100	0	1594200	1998800	569010	457270	530920	357690	0	83906	2	1	0	0	0	0	By MS/MS	By MS/MS	By matching	By MS/MS		By matching
Q0E4K1	Q0E4K1	Catalase isozyme A	CATA	3881000000	3830100000	3546100000	4128500000	3296900000	3446900000	19	19	9	52.2	52.2	26.6	56.697	0	287.55	20725000000	627	3676300000	2912900000	3479900000	4397200000	4565000000	1694100000	829020000	147050000	116520000	139190000	175890000	182600000	67765000	130	116	112	98	100	71	By MS/MS	By MS/MS	By MS/MS	By MS/MS	By MS/MS	By MS/MS
Q0E4P2	Q0E4P2	Os02g0107000 protein (Fragment)	Os02g0107000	0	0	11079000	0	0	0	2	2	2	6.9	6.9	6.9	45.002	0	12.725	41976000	2	12679000	10752000	11794000	0	4922000	1828600	1908000	576310	488720	536100	0	223730	83118	0	0	1	0	1	0	By matching	By matching	By MS/MS		By MS/MS	By matching
Q9ZRJ5;Q0E4Q5;Q9LWZ6	Q9ZRJ5;Q0E4Q5	L-lactate dehydrogenase;L-lactate dehydrogenase	OJA1212_C06.25;Os02g0105400	95637000	99829000	93865000	59208000	70873000	92358000	10	10	10	43.9	43.9	43.9	38.17	0	75.927	473960000	39	100040000	91862000	112160000	55391000	85447000	29053000	27880000	5884700	5403600	6597900	3258300	5026300	1709000	8	10	11	2	7	1	By MS/MS	By MS/MS	By MS/MS	By MS/MS	By MS/MS	By MS/MS
Q0ILB9	Q0ILB9	Glycerol kinase-like protein	OGK1	26460000	29479000	29915000	36370000	48818000	44906000	7	7	7	17.8	17.8	17.8	57.178	0	46.316	210820000	20	30072000	25011000	24021000	39630000	79559000	12524000	8108300	1156600	961940	923900	1524200	3059900	481700	4	4	4	3	4	1	By MS/MS	By MS/MS	By MS/MS	By MS/MS	By MS/MS	By MS/MS
Q0IN14;A0A0P0YAL1	Q0IN14;A0A0P0YAL1	Hsp90 protein, expressed;Os12g0514500 protein (Fragment)	LOC_Os12g32986;Os12g0514500	7048700	7344800	8143300	6834800	0	0	7	2	2	10.2	2.5	2.5	91.479	0	12.38	34581000	7	7097400	6097000	8614300	6785900	4748900	1237600	735770	151010	129720	183280	144380	101040	26333	2	2	2	1	0	0	By MS/MS	By MS/MS	By MS/MS	By MS/MS	By matching	By matching
Q0INA3	Q0INA3	Ubiquitin carboxyl-terminal hydrolase (Fragment)	Os12g0489100	82256000	59251000	61467000	79375000	61845000	79309000	12	12	5	30.7	30.7	12.9	64.11	0	80.776	397860000	42	82281000	66702000	84741000	56532000	84335000	23267000	14735000	3047400	2470400	3138500	2093800	3123500	861750	12	8	14	3	4	1	By MS/MS	By MS/MS	By MS/MS	By MS/MS	By MS/MS	By MS/MS
Q0INM3	Q0INM3	Beta-galactosidase 15	Os12g0429200	22044000	22255000	18788000	0	0	0	4	4	4	6.6	6.6	6.6	101.01	0	25.858	71988000	8	21991000	16909000	22083000	4607400	4408000	1990700	1469200	448790	345070	450670	94029	89959	40626	3	3	1	1	0	0	By MS/MS	By MS/MS	By MS/MS	By MS/MS	By matching	By matching
Q0INR8	Q0INR8	Os12g0405700 protein	Os12g0405700	8259500	7679300	10702000	0	0	0	2	2	2	41.7	41.7	41.7	5.5422	0	12.028	27838000	5	8684200	6930800	10235000	0	1987800	0	13919000	4342100	3465400	5117600	0	993900	0	1	1	2	0	1	0	By MS/MS	By MS/MS	By MS/MS		By MS/MS
Q0IPL3	Q0IPL3	Os12g0189300 protein	Os12g0189300	2080400000	2155600000	2173200000	1505200000	1444600000	1503200000	11	11	11	39.9	39.9	39.9	34.716	0	131.1	11343000000	368	2117600000	1882600000	2192100000	1902800000	2509200000	738650000	667230000	124560000	110740000	128950000	111930000	147600000	43450000	78	77	78	45	52	38	By MS/MS	By MS/MS	By MS/MS	By MS/MS	By MS/MS	By MS/MS
Q0IQF7	Q0IQF7	40S ribosomal protein S16	RPS16A	61862000	56257000	66915000	115040000	115530000	81288000	5	5	5	32.9	32.9	32.9	16.819	0	32.11	474520000	33	67432000	55055000	87642000	85173000	145140000	34072000	52724000	7492500	6117300	9738000	9463700	16127000	3785800	5	7	7	4	6	4	By MS/MS	By MS/MS	By MS/MS	By MS/MS	By MS/MS	By MS/MS
Q7XBA6;Q0IQK9;Q53MW2	Q7XBA6;Q0IQK9;Q53MW2	Non-specific lipid-transfer protein;Non-specific lipid-transfer protein 1	Os11g0115400;LTP	0	0	0	0	0	5623600	1	1	1	11.2	11.2	11.2	11.317	0.0015974	7.2405	52966000	8	9765100	6481500	10460000	11957000	12097000	2204900	10593000	1953000	1296300	2092000	2391500	2419400	440990	1	2	1	2	2	0	By MS/MS	By MS/MS	By MS/MS	By MS/MS	By MS/MS	By matching
Q0IQT2	Q0IQT2	Os12g0102100 protein	Os12g0102100	0	0	0	0	5059700	0	1	1	1	17.8	17.8	17.8	20.278	0.00087184	9.6193	25660000	2	10759000	0	8334600	0	6566900	0	3207500	1344800	0	1041800	0	820860	0	1	0	1	0	0	0	By MS/MS		By MS/MS		By matching
Q0ISQ1	Q0ISQ1	Os11g0482100 protein (Fragment)	Os11g0482100	0	0	0	0	0	0	1	1	1	1.6	1.6	1.6	64.301	0.0043605	6.2535	0	1	0	0	0	0	0	0	0	0	0	0	0	0	0	0	0	0	1	0	0				By MS/MS
Q0IT04;Q6ZDG9	Q0IT04	Protein transport protein SEC23 (Fragment)	Os11g0433500	24070000	21455000	19790000	38802000	31608000	29761000	5	5	5	28.2	28.2	28.2	39.767	0	36.633	162520000	12	34447000	25273000	26150000	24766000	45646000	6238100	14774000	3131500	2297500	2377200	2251500	4149600	567100	3	4	2	1	1	1	By MS/MS	By MS/MS	By MS/MS	By MS/MS	By MS/MS	By MS/MS
Q0ITJ6	Q0ITJ6	Os11g0248200 protein (Fragment)	Os11g0248200	0	0	0	7147100	6121700	0	2	2	2	11	11	11	38.75	0	12.789	42727000	2	7478900	7644100	9894500	7716700	7121300	2871700	2373700	415490	424670	549700	428700	395630	159540	0	0	0	1	1	0	By matching	By matching	By matching	By MS/MS	By MS/MS	By matching
Q0IU89;Q6K685	Q0IU89;Q6K685	Os11g0175900 protein (Fragment);Os02g0793100 protein	Os11g0175900;Os02g0793100	0	0	0	0	1939300	0	1	1	1	1.7	1.7	1.7	87.235	0.0056022	6.0013	10493000	2	0	2234500	3574500	2167100	2517000	0	249830	0	53202	85106	51598	59928	0	0	1	1	0	0	0		By MS/MS	By MS/MS	By matching	By matching
Q0IV61;Q2QYP9	Q0IV61;Q2QYP9	Os11g0110100 protein (Fragment);Expressed protein	Os11g0110100;LOC_Os12g01950	0	0	0	0	0	4419700	1	1	1	4.9	4.9	4.9	28.898	0.0022745	6.6989	13389000	1	2929400	4157000	4570000	0	0	1732900	1217200	266310	377910	415460	0	0	157540	0	0	1	0	0	0	By matching	By matching	By MS/MS			By matching
Q0IVQ5	Q0IVQ5	Os10g0559700 protein (Fragment)	Os10g0559700	0	0	6096500	0	0	0	1	1	1	2.4	2.4	2.4	126.46	0.0016207	7.4468	6490100	1	0	0	6490100	0	0	0	138090	0	0	138090	0	0	0	0	0	1	0	0	0			By MS/MS
Q0IWS0	Q0IWS0	Os10g0492300 protein	Os10g0492300	41455000	47059000	49812000	49890000	58999000	55133000	10	10	10	33.3	33.3	33.3	46.053	0	86.557	291440000	33	47584000	47240000	56828000	51835000	74206000	13751000	11209000	1830100	1816900	2185700	1993700	2854100	528880	5	6	8	5	8	1	By MS/MS	By MS/MS	By MS/MS	By MS/MS	By MS/MS	By MS/MS
Q0IXP9;A0A0P0XU66	Q0IXP9;A0A0P0XU66	Acylamino-acid-releasing enzyme 1;Os10g0415600 protein (Fragment)	Os10g0415600;Os10g0415600	67989000	66276000	76119000	93532000	52080000	72362000	12	12	12	19.7	19.7	19.7	84.939	0	86.088	384070000	39	83690000	68965000	89214000	73135000	39940000	29124000	9847900	2145900	1768300	2287500	1875300	1024100	746760	11	9	10	4	5	0	By MS/MS	By MS/MS	By MS/MS	By MS/MS	By MS/MS	By matching
Q0IZQ2;A0A0N7KRW9	Q0IZQ2	Cysteine--tRNA ligase CPS1 homolog, chloroplastic/mitochondrial	Os09g0556500	21937000	20549000	24962000	46881000	22903000	0	4	4	4	7	7	7	63.946	0	24.712	142390000	16	24106000	18611000	30498000	47064000	18968000	3147600	5273900	892830	689300	1129600	1743100	702500	116580	3	5	3	2	2	1	By MS/MS	By MS/MS	By MS/MS	By MS/MS	By MS/MS	By MS/MS
Q0IZR7	Q0IZR7	Os09g0553900 protein	Os09g0553900	40156000	38162000	31415000	0	17723000	0	5	5	5	8.7	8.7	8.7	94.215	0	35.74	132910000	13	35749000	34517000	38227000	4193100	18493000	1733100	2658200	714980	690350	764540	83861	369850	34662	4	4	4	0	1	0	By MS/MS	By MS/MS	By MS/MS	By matching	By MS/MS	By matching
Q0J0H6	Q0J0H6	Os09g0509000 protein	Os09g0509000	0	0	0	0	0	5490600	1	1	1	3.3	3.3	3.3	42.933	0.00083195	7.8725	46030000	5	9437600	8006200	10565000	5268100	10600000	2152800	3287800	674120	571870	754640	376290	757130	153770	1	1	1	1	1	0	By MS/MS	By MS/MS	By MS/MS	By MS/MS	By MS/MS	By matching
Q0J0L4	Q0J0L4	Uridine kinase	Os09g0505800	0	0	0	0	0	6473600	4	2	2	13.1	7.3	7.3	55.042	0	14.053	13124000	2	3786400	1870200	0	2442300	2486400	2538200	504750	145630	71931	0	93935	95631	97624	1	0	0	1	0	0	By MS/MS	By matching	By matching	By MS/MS	By matching	By matching
Q0J0Z5	Q0J0Z5	Os09g0474300 protein	Os09g0474300	0	0	17369000	0	0	0	11	2	2	22.9	3.2	3.2	74.805	0	13.823	35868000	6	10618000	6759000	18490000	0	0	0	943890	279430	177870	486580	0	0	0	2	2	2	0	0	0	By MS/MS	By MS/MS	By MS/MS	By matching	By matching	By matching
Q67UE5;Q0J1E1	Q67UE5;Q0J1E1	Os09g0446800 protein;Os09g0446800 protein	Os09g0446800;Os09g0446800	151790000	157220000	156120000	178090000	191290000	186180000	16	16	16	30.7	30.7	30.7	68.112	0	119.94	998480000	80	119830000	102780000	138040000	155010000	415880000	66936000	32209000	3865600	3315500	4452900	5000300	13415000	2159200	15	14	21	11	12	7	By MS/MS	By MS/MS	By MS/MS	By MS/MS	By MS/MS	By MS/MS
Q0J3C0;Q6K439	Q0J3C0;Q6K439	Os09g0133600 protein (Fragment);Probable plastid-lipid-associated protein 2, chloroplastic	Os09g0133600;PAP2	8671100	5242800	0	45279000	60291000	9491900	4	4	4	24.1	24.1	24.1	26.489	0	29.934	149790000	8	5024500	5122600	1206600	46009000	87088000	5338700	10699000	358890	365900	86186	3286300	6220600	381330	0	1	0	4	2	1	By matching	By MS/MS	By matching	By MS/MS	By MS/MS	By MS/MS
Q0J3S0;Q6ZJ16	Q0J3S0;Q6ZJ16	Os08g0557100 protein (Fragment);Os08g0557100 protein	Os08g0557100;OJ1150_A11.19-2	8997300	9974700	25111000	0	71650000	38074000	6	6	6	43.3	43.3	43.3	21.389	0	47.363	166420000	9	15001000	14001000	18923000	6614100	101780000	10099000	18491000	1666800	1555600	2102600	734900	11309000	1122100	1	1	3	0	3	1	By MS/MS	By MS/MS	By MS/MS	By matching	By MS/MS	By MS/MS
Q0J4M3;Q6ZK87	Q0J4M3;Q6ZK87	Os08g0504400 protein;Erwinia chrysanthemi IndA protein homolog-like	Os08g0504400;Os08g0504400	108660000	85922000	72331000	0	0	0	3	3	3	14.1	14.1	14.1	31.733	0	20.024	310550000	6	77697000	88287000	88302000	7228200	26380000	22661000	17253000	4316500	4904800	4905700	401570	1465600	1258900	2	2	2	0	0	0	By MS/MS	By MS/MS	By MS/MS	By matching	By matching	By matching
Q0J5H3;Q5QLS8;Q8H4E0	Q0J5H3;Q5QLS8	Malate dehydrogenase (Fragment);Malate dehydrogenase	Os08g0434300;Os01g0829800	35191000	32995000	40613000	40166000	77632000	40495000	6	6	6	27	27	27	37.436	0	47.579	259800000	18	39637000	30575000	42055000	45189000	87337000	15011000	14434000	2202100	1698600	2336400	2510500	4852100	833920	6	5	4	1	2	0	By MS/MS	By MS/MS	By MS/MS	By MS/MS	By MS/MS	By matching
Q0J5L9	Q0J5L9	Os08g0424200 protein (Fragment)	Os08g0424200	29143000	27456000	25066000	37027000	37768000	29287000	5	5	5	18.4	18.4	18.4	33.637	0	41.098	172630000	14	33198000	27080000	33189000	32694000	35239000	11235000	7847000	1509000	1230900	1508600	1486100	1601800	510690	4	4	4	1	1	0	By MS/MS	By MS/MS	By MS/MS	By MS/MS	By MS/MS	By matching
Q0J5V5;A0A0P0XFN5	Q0J5V5	Aminopeptidase M1-B	Os08g0398700	83002000	95780000	76965000	42449000	32517000	72250000	15	15	15	22.3	22.3	22.3	97.902	0	107.51	358920000	40	82189000	72449000	82047000	23792000	66620000	31826000	7802700	1786700	1575000	1783600	517210	1448300	691870	12	10	14	1	1	2	By MS/MS	By MS/MS	By MS/MS	By MS/MS	By MS/MS	By MS/MS
Q0J6W9	Q0J6W9	Os08g0254900 protein	Os08g0254900	0	0	15672000	0	0	0	2	2	2	12.9	12.9	12.9	34.365	0	15.138	50792000	1	16171000	16662000	16684000	0	0	1275800	3386100	1078000	1110800	1112300	0	0	85052	0	0	1	0	0	0	By matching	By matching	By MS/MS			By matching
Q0J709;A0A0N7KPI4;A0A0P0XDE8	Q0J709;A0A0N7KPI4	ACT domain-containing protein DS12, chloroplastic;Os08g0242700 protein (Fragment)	Os08g0242700;Os08g0242700	275160000	290570000	250040000	323010000	257120000	263810000	10	10	10	47.7	47.7	47.7	30.322	0	102.78	1546300000	67	259940000	236340000	270770000	310970000	356370000	111970000	103090000	17330000	15756000	18051000	20731000	23758000	7464600	16	15	13	10	7	6	By MS/MS	By MS/MS	By MS/MS	By MS/MS	By MS/MS	By MS/MS
Q0J716	Q0J716	Villin-5	VLN5	11571000	12523000	11941000	0	0	9187000	4	2	2	5.3	2.4	2.4	107.34	0	19.081	48395000	6	11107000	9990300	13407000	4095800	6072600	3723000	864200	198330	178400	239410	73139	108440	66483	2	2	2	0	0	0	By MS/MS	By MS/MS	By MS/MS	By matching	By matching	By matching
Q0J7M1	Q0J7M1	diacylglycerol kinase	Os08g0178700	0	0	0	0	0	5896200	2	2	2	5.6	5.6	5.6	55.854	0	12.208	28588000	2	4782800	4110700	6183800	5232500	5966100	2311800	952920	159430	137020	206130	174420	198870	77061	0	0	1	1	0	0	By matching	By matching	By MS/MS	By MS/MS	By matching	By matching
Q0J7U6;A0A0P0XC79	Q0J7U6	Protein TOPLESS-RELATED PROTEIN 2	TPR2	75668000	67732000	73438000	37282000	45948000	63422000	10	10	7	11.8	11.8	9.2	124.78	0	73.746	316480000	30	80770000	66724000	76571000	21100000	40830000	30480000	6593200	1682700	1390100	1595200	439580	850620	635010	9	7	11	1	1	1	By MS/MS	By MS/MS	By MS/MS	By MS/MS	By MS/MS	By MS/MS
Q0J8A4;A0A0P0XBB4	Q0J8A4	Glyceraldehyde-3-phosphate dehydrogenase 1, cytosolic	GAPC1	238580000	215540000	276480000	401230000	446620000	346310000	15	9	9	55.2	35.9	35.9	36.412	0	124.67	2038100000	73	188710000	147060000	202980000	369560000	1050400000	79404000	101900000	9435600	7352900	10149000	18478000	52519000	3970200	14	15	11	12	18	3	By MS/MS	By MS/MS	By MS/MS	By MS/MS	By MS/MS	By MS/MS
Q0J8M2	Q0J8M2	Ferredoxin-1, chloroplastic	ADI1	111590000	104090000	153340000	237090000	37411000	189180000	2	2	2	10.1	10.1	10.1	14.951	0	20.833	718540000	44	115960000	95297000	160950000	224770000	48248000	73319000	119760000	19326000	15883000	26825000	37462000	8041300	12220000	9	10	10	6	4	5	By MS/MS	By MS/MS	By MS/MS	By MS/MS	By MS/MS	By MS/MS
Q0J8W7	Q0J8W7	Os04g0683900 protein	Os04g0683900	0	0	0	0	2559700	0	1	1	1	5.3	5.3	5.3	42.84	0.0036846	6.3556	13199000	1	2582300	1866100	2764700	2663600	3322200	0	1099900	215190	155510	230390	221970	276850	0	0	0	1	0	0	0	By matching	By matching	By MS/MS	By matching	By matching
Q0J9Q1	Q0J9Q1	OSJNBb0034I13.9 protein	Os04g0636900	0	0	0	0	0	0	1	1	1	1.4	1.4	1.4	52.204	0.0015408	6.8713	0	1	0	0	0	0	0	0	0	0	0	0	0	0	0	0	1	0	0	0	0		By MS/MS
Q0J9Y2	Q0J9Y2	Os04g0625800 protein	Os04g0625800	0	0	0	0	0	6978400	2	2	2	5.2	5.2	5.2	46.195	0.00091241	11.399	25465000	4	10299000	6849100	5580100	0	0	2736100	1958800	792260	526850	429240	0	0	210470	1	0	3	0	0	0	By MS/MS	By matching	By MS/MS			By matching
Q0J9Z0;A0A0P0WEZ6	Q0J9Z0;A0A0P0WEZ6	Os04g0624600 protein;Os04g0624600 protein (Fragment)	SSIII-1;Os04g0624600	39870000	38248000	45489000	44825000	37158000	43650000	6	6	6	6.8	6.8	6.8	138.2	0	41.807	223190000	17	42499000	30469000	49537000	40125000	40105000	20454000	3985500	758920	544090	884590	716520	716160	365260	4	3	4	2	2	2	By MS/MS	By MS/MS	By MS/MS	By MS/MS	By MS/MS	By MS/MS
Q0JA93;Q6Z3V9;A0A0N7KNC5	Q0JA93	Methionine aminopeptidase	Os04g0610500	72472000	69726000	73520000	70787000	53707000	59319000	5	5	5	21.8	21.8	21.8	37.134	0	48.188	374370000	40	75588000	59594000	77897000	67637000	71932000	21724000	18719000	3779400	2979700	3894800	3381900	3596600	1086200	9	9	9	5	5	3	By MS/MS	By MS/MS	By MS/MS	By MS/MS	By MS/MS	By MS/MS
Q0JAC6	Q0JAC6	Os04g0605900 protein	Os04g0605900	55260000	52168000	64520000	72548000	67219000	50698000	9	9	3	36.1	36.1	11.5	28.361	0	54.544	338180000	34	61144000	51479000	73997000	52996000	75867000	22700000	21136000	3821500	3217400	4624800	3312200	4741700	1418700	8	8	8	4	5	1	By MS/MS	By MS/MS	By MS/MS	By MS/MS	By MS/MS	By MS/MS
Q0JAF4;A0A0N7KJM7	Q0JAF4;A0A0N7KJM7	Os04g0602100 protein;Os04g0602100 protein (Fragment)	Os04g0602100;Os04g0602100	17052000	14717000	30448000	17729000	17984000	14052000	4	4	4	15.3	15.3	15.3	38.181	0	25.839	103980000	12	20352000	14174000	8199800	22792000	30460000	8003400	4726400	925110	644290	372720	1036000	1384600	363790	2	2	2	2	3	1	By MS/MS	By MS/MS	By MS/MS	By MS/MS	By MS/MS	By MS/MS
Q0JAH7	Q0JAH7	Os04g0598900 protein	Os04g0598900	0	0	0	0	0	14790000	1	1	1	1.2	1.2	1.2	83.971	0.0062762	5.9863	77019000	6	21520000	14724000	7263400	27712000	0	5798800	2655800	742060	507730	250460	955600	0	199960	1	1	0	4	0	0	By MS/MS	By MS/MS	By MS/MS	By MS/MS		By matching
Q6Z8E0;Q0JAI2	Q6Z8E0;Q0JAI2	Os02g0699600 protein;OSJNba0093F12.16 protein	Os02g0699600;Os04g0598200	71086000	85065000	84300000	59941000	45049000	55464000	3	3	3	22.3	22.3	22.3	17.716	0	22.316	380060000	21	71588000	63814000	81627000	58411000	81060000	23561000	42229000	7954200	7090500	9069700	6490100	9006700	2617900	3	2	2	6	6	2	By MS/MS	By MS/MS	By MS/MS	By MS/MS	By MS/MS	By MS/MS
Q0JB40;A0A0P0WDE0	Q0JB40;A0A0P0WDE0	Os04g0558400 protein;Os04g0558400 protein (Fragment)	Os04g0558400;Os04g0558400	57752000	67715000	51689000	60252000	46983000	60729000	9	9	9	32.5	32.5	32.5	48.159	0	65.18	316710000	39	69251000	61747000	75337000	53643000	38081000	18648000	13196000	2885400	2572800	3139100	2235100	1586700	777000	7	10	10	5	4	3	By MS/MS	By MS/MS	By MS/MS	By MS/MS	By MS/MS	By MS/MS
Q0JBC2	Q0JBC2	Os04g0542900 protein	Os04g0542900	52028000	56264000	56380000	44038000	36513000	31545000	5	5	5	12.5	12.5	12.5	59.246	0	37.193	267090000	24	60355000	51855000	70703000	46854000	30815000	6503300	9538800	2155500	1852000	2525100	1673400	1100500	232260	7	6	6	2	2	1	By MS/MS	By MS/MS	By MS/MS	By MS/MS	By MS/MS	By MS/MS
Q0JBE3	Q0JBE3	Os04g0538100 protein (Fragment)	Os04g0538100	188080000	198460000	195040000	170140000	188730000	188450000	14	14	14	49.7	49.7	49.7	42.134	0	116.69	1043900000	81	192150000	179870000	223790000	156090000	214400000	77629000	45388000	8354200	7820300	9730000	6786600	9321600	3375200	18	17	17	7	14	8	By MS/MS	By MS/MS	By MS/MS	By MS/MS	By MS/MS	By MS/MS
Q7XKK0;Q0JBL5	Q7XKK0;Q0JBL5	ATP-dependent Clp protease proteolytic subunit;ATP-dependent Clp protease proteolytic subunit	OSJNBa0038O10.7;Os04g0525600	0	7192300	7910200	0	0	0	3	2	2	20.8	18.1	18.1	27.954	0	15.089	20495000	2	4936000	5711300	8759000	0	0	1089000	1576600	379690	439330	673770	0	0	83772	0	1	1	0	0	0	By matching	By MS/MS	By MS/MS	By matching	By matching	By matching
Q0JBV4	Q0JBV4	Isocitrate dehydrogenase [NADP]	Os04g0508200	0	0	5772100	0	0	0	1	1	1	2.7	2.7	2.7	53.557	0.0015949	7.2289	31815000	8	13352000	9594000	8868300	0	0	0	1223600	513550	369000	341090	0	0	0	3	3	2	0	0	0	By MS/MS	By MS/MS	By MS/MS
Q0JBY8;Q7XIK5;Q0JA68	Q0JBY8;Q7XIK5;Q0JA68	Os04g0502300 protein;Os04g0613600 protein;Os04g0613500 protein (Fragment)	Os04g0502300;OJ1773_H01.103;NA	24409000	0	22334000	0	0	0	2	2	2	10.6	10.6	10.6	18.001	0	12.637	89413000	8	23626000	0	24609000	15923000	17457000	7797000	9934800	2625100	0	2734300	1769300	1939700	866340	2	1	2	1	1	1	By MS/MS	By MS/MS	By MS/MS	By MS/MS	By MS/MS	By MS/MS
Q94CM9;Q0JBZ7	Q94CM9;Q0JBZ7	Os01g0348700 protein;Os04g0501000 protein	Os01g0348700;Os04g0501000	41104000	48665000	37035000	33181000	56278000	38797000	4	4	4	29.6	29.6	29.6	17.05	0	27.586	236060000	22	41138000	40907000	46461000	34018000	56634000	16898000	39343000	6856400	6817900	7743500	5669600	9438900	2816300	5	5	3	4	4	1	By MS/MS	By MS/MS	By MS/MS	By MS/MS	By MS/MS	By MS/MS
Q0JCA4	Q0JCA4	Os04g0482800 protein	Os04g0482800	20867000	30637000	18632000	35018000	33402000	24311000	5	5	5	11.2	11.2	11.2	72.98	0	32.545	146320000	8	18075000	15100000	8715200	33513000	54074000	16848000	4180700	516420	431440	249010	957510	1545000	481370	1	2	2	1	2	0	By MS/MS	By MS/MS	By MS/MS	By MS/MS	By MS/MS	By matching
Q0JCE5;A0A0P0WBB8;A0A0P0WBN3	Q0JCE5;A0A0P0WBB8;A0A0P0WBN3	Amine oxidase (Fragment);Amine oxidase (Fragment)	Os04g0476100;Os04g0476100	20441000	22512000	24033000	11684000	12593000	13527000	4	4	4	12.5	12.5	12.5	58.726	0	26.828	96457000	6	15665000	18314000	24857000	13093000	17995000	6532900	3444900	559470	654080	887750	467610	642670	233320	2	2	2	0	0	0	By MS/MS	By MS/MS	By MS/MS	By matching	By matching	By matching
Q0JCU7	Q0JCU7	Zeaxanthin epoxidase, chloroplastic	ZEP	0	0	7415400	0	0	0	2	2	2	4.9	4.9	4.9	71.798	0	13.486	20839000	2	5723000	4017800	7894200	748360	1917400	537960	651210	178840	125560	246690	23386	59919	16811	0	0	1	0	1	0	By matching	By matching	By MS/MS	By matching	By MS/MS	By matching
Q0JCY4	Q0JCY4	Protein phosphatase methylesterase 1	Os04g0443500	0	8489200	14309000	0	0	0	2	2	2	10.5	10.5	10.5	37.632	0	14.173	50770000	6	9770700	9549900	12033000	6480000	7705500	5231600	2672100	514250	502630	633290	341050	405550	275350	1	1	3	1	0	0	By MS/MS	By MS/MS	By MS/MS	By MS/MS	By matching	By matching
Q0JD43;A0A0P0WAC5;Q53PH5	Q0JD43;A0A0P0WAC5	OSJNBa0084A10.16 protein;Os04g0432400 protein (Fragment)	OSJNBa0084A10.16;Os04g0432400	35525000	30351000	49329000	19952000	35482000	23559000	6	6	3	12	12	6.6	64.411	0	37.854	189990000	22	25993000	22851000	56493000	23072000	50680000	10897000	6332800	866420	761700	1883100	769060	1689300	363240	6	3	7	1	5	0	By MS/MS	By MS/MS	By MS/MS	By MS/MS	By MS/MS	By MS/MS
Q650W1;Q650V6;Q0JDF7;Q8H0A1	Q650W1;Q650V6;Q0JDF7	Arogenate dehydratase;Arogenate dehydratase;Arogenate dehydratase	Os09g0565700;Os09g0566050;NA	12414000	10723000	0	0	0	0	3	2	2	8.2	6.5	6.5	43.709	0	14.334	29811000	5	12409000	8913000	6133700	2355900	0	0	1355100	564030	405140	278800	107090	0	0	2	2	1	0	0	0	By MS/MS	By MS/MS	By MS/MS	By matching		By matching
Q0JDK3;A0A0P0WA31	Q0JDK3;A0A0P0WA31	Os04g0398300 protein (Fragment);Os04g0398300 protein (Fragment)	Os04g0398300;Os04g0398300	124260000	120240000	133040000	157720000	182590000	177000000	8	8	8	46.2	46.2	46.2	32.433	0	76.143	850990000	55	127300000	79641000	141640000	128910000	301430000	72071000	56733000	8486900	5309400	9442700	8594100	20095000	4804700	14	13	11	5	8	4	By MS/MS	By MS/MS	By MS/MS	By MS/MS	By MS/MS	By MS/MS
Q0JDU3	Q0JDU3	Os04g0376300 protein (Fragment)	Os04g0376300	0	0	9766500	0	0	0	2	2	2	14.3	14.3	14.3	17.941	0	12.549	47867000	4	9113300	8398800	10397000	6953200	11200000	1804700	7977900	1518900	1399800	1732800	1158900	1866700	300780	1	1	1	1	0	0	By MS/MS	By MS/MS	By MS/MS	By MS/MS	By matching	By matching
Q0JDZ7	Q0JDZ7	40S ribosomal protein S8	Os04g0349500	88735000	100770000	140920000	146320000	121180000	125710000	10	10	4	46.6	46.6	14.5	24.928	0	90.585	677540000	54	87214000	67496000	115550000	139160000	205630000	62489000	75282000	9690400	7499600	12839000	15462000	22848000	6943200	10	11	11	7	11	4	By MS/MS	By MS/MS	By MS/MS	By MS/MS	By MS/MS	By MS/MS
Q0JE23	Q0JE23	Os04g0340300 protein	Os04g0340300	5906900	11229000	0	0	13110000	0	2	2	2	5	5	5	69.295	0	14.082	44783000	3	2336200	3247900	4753500	584190	31149000	2711600	1210300	63141	87781	128470	15789	841870	73287	1	1	0	0	1	0	By MS/MS	By MS/MS	By matching	By matching	By MS/MS	By matching
Q0JEF5	Q0JEF5	Flowering-promoting factor 1-like protein 4	Os04g0282400	0	0	4240100	0	0	0	1	1	1	16.1	16.1	16.1	13.149	0.0016234	7.4804	14562000	2	6476700	3571600	4513800	0	0	0	1820300	809580	446450	564230	0	0	0	1	0	1	0	0	0	By MS/MS	By matching	By MS/MS
Q0JF58;A0A0P0W6U0;A0A0P0W6M1;Q5NBN9	Q0JF58;A0A0P0W6U0	Protein argonaute 4B;Os04g0151800 protein (Fragment)	AGO4B;Os04g0151800	96805000	98812000	101040000	80915000	85445000	80275000	16	16	15	24.1	24.1	23.1	101.74	0	117.73	551040000	56	95188000	73271000	106450000	83462000	162200000	30464000	11021000	1903800	1465400	2129000	1669200	3244000	609280	11	10	14	6	11	4	By MS/MS	By MS/MS	By MS/MS	By MS/MS	By MS/MS	By MS/MS
Q0JFE2	Q0JFE2	Os04g0111200 protein (Fragment)	Os04g0111200	21672000	21262000	25392000	17464000	14350000	12846000	5	5	3	22.2	22.2	14.2	24.954	0	30.506	110050000	13	22322000	19424000	26784000	13733000	23937000	3854300	7337000	1488200	1294900	1785600	915530	1595800	256950	2	4	4	0	3	0	By MS/MS	By MS/MS	By MS/MS	By matching	By MS/MS	By matching
Q0JGK4;A0A0P0VCD2	Q0JGK4	Probable sucrose-phosphate synthase 1	SPS1	24639000	24107000	26942000	22101000	18283000	18932000	8	7	7	9.5	8.9	8.9	119.35	0	50.686	126360000	25	26777000	24577000	32318000	14164000	21773000	6754400	2430100	514950	472630	621500	272380	418710	129890	7	6	6	2	4	0	By MS/MS	By MS/MS	By MS/MS	By MS/MS	By MS/MS	By MS/MS
Q0JHF8	Q0JHF8	Fructose-1,6-bisphosphatase, cytosolic	CFBP1	169490000	157830000	186860000	124490000	136890000	129830000	13	13	13	37.2	37.2	37.2	37.035	0	105.45	855600000	79	163760000	145420000	211080000	95672000	181670000	57997000	45031000	8618900	7653800	11109000	5035400	9561400	3052500	16	12	20	9	14	8	By MS/MS	By MS/MS	By MS/MS	By MS/MS	By MS/MS	By MS/MS
Q0JJ42	Q0JJ42	Os01g0761300 protein (Fragment)	Os01g0761300	0	0	0	0	3905600	0	2	2	2	10.3	10.3	10.3	37.992	0	11.816	1378400000	2	5814900	7299400	5662800	0	5069000	1354500000	106030000	447300	561500	435600	0	389920	104190000	0	0	1	0	0	1	By matching	By matching	By MS/MS		By matching	By MS/MS
Q0JJS8;A0A0P0V7H1	Q0JJS8;A0A0P0V7H1	Fe-S cluster assembly factor HCF101, chloroplastic;Os01g0719700 protein (Fragment)	HCF101;Os01g0719700	13970000	19507000	15718000	0	0	24045000	4	4	4	9.8	9.8	9.8	56.922	0	25.138	66526000	6	13245000	17944000	19608000	2050100	5845900	7832900	2558700	509420	690140	754160	78850	224840	301270	2	1	3	0	0	0	By MS/MS	By MS/MS	By MS/MS	By matching	By matching	By matching
Q0JK13;Q65XN2;Q5N9S2	Q0JK13;Q65XN2;Q5N9S2	Os01g0703600 protein;Os05g0543100 protein	Os01g0703600;Os05g0543100	6684300	6712300	6959200	0	6903300	0	2	2	2	6.1	6.1	6.1	48.975	0	13.13	32563000	5	6281900	5428400	7092200	1613100	10099000	2049100	1628200	314090	271420	354610	80655	504930	102460	1	1	2	1	0	0	By MS/MS	By MS/MS	By MS/MS	By MS/MS	By matching	By matching
Q0JKD0;Q0DG35	Q0JKD0;Q0DG35	Glutamate synthase 1 [NADH], chloroplastic;Glutamate synthase 2 [NADH], chloroplastic	Os01g0681900;Os05g0555600	0	0	5517000	0	0	0	2	2	2	0.9	0.9	0.9	236.89	0	12.327	25812000	3	5305400	5822300	6746000	2979600	3797800	1160600	234650	48231	52930	61327	27087	34526	10551	1	0	1	0	1	0	By MS/MS	By matching	By MS/MS	By matching	By MS/MS	By matching
Q0JKF5;A0A0P0V6J4	Q0JKF5;A0A0P0V6J4	Os01g0678600 protein;Os01g0678600 protein (Fragment)	Os01g0678600;Os01g0678600	53426000	56375000	59091000	43714000	43070000	50423000	4	4	4	17.3	17.3	17.3	21.519	0	25.951	279070000	20	67721000	62254000	74912000	30581000	24241000	19360000	46511000	11287000	10376000	12485000	5096800	4040100	3226700	4	3	6	1	4	2	By MS/MS	By MS/MS	By MS/MS	By MS/MS	By MS/MS	By MS/MS
Q0JKP1	Q0JKP1	Pyruvate kinase (Fragment)	Os01g0660300	24613000	34174000	20527000	28271000	23636000	33470000	6	5	5	21.5	18.5	18.5	40.589	0	33.836	148920000	17	31782000	33181000	23689000	18934000	30220000	11111000	8273100	1765700	1843400	1316000	1051900	1678900	617260	5	5	2	1	4	0	By MS/MS	By MS/MS	By MS/MS	By MS/MS	By MS/MS	By matching
Q0JLA3	Q0JLA3	Os01g0613300 protein	Os01g0613300	0	0	0	3181100	0	0	1	1	1	6.2	6.2	6.2	22.117	0.0050396	6.1591	28587000	1	9763400	7243000	8426100	3154400	0	0	2598800	887580	658460	766010	286770	0	0	1	0	0	0	0	0	By MS/MS	By matching	By matching	By matching
Q0JLN7	Q0JLN7	Os01g0585700 protein (Fragment)	Os01g0585700	0	0	0	0	0	3305000	1	1	1	4	4	4	49.745	0.0016038	7.2946	19461000	3	3407500	3139300	4283000	2544700	4791100	1295800	1297400	227170	209290	285530	169640	319410	86389	1	0	1	0	1	0	By MS/MS	By matching	By MS/MS	By matching	By MS/MS	By matching
Q5JK84;Q0JM17;A0A0N7KD50	Q5JK84;Q0JM17;A0A0N7KD50	DEAD-box ATP-dependent RNA helicase 15;DEAD-box ATP-dependent RNA helicase 56	AIP2;AIP1	106680000	123300000	96238000	94685000	138800000	114540000	9	9	9	27.8	27.8	27.8	48.566	0	87.726	575690000	46	85718000	72735000	92193000	78197000	162130000	84721000	31983000	4762100	4040800	5121800	4344300	9007100	4706700	9	7	13	5	7	5	By MS/MS	By MS/MS	By MS/MS	By MS/MS	By MS/MS	By MS/MS
Q0JMH0;B7EAG8;A0A0P0V3A0	Q0JMH0;B7EAG8	2-hydroxyacyl-CoA lyase;Os01g0505400 protein	Os01g0505400;Os01g0505400	73934000	66429000	81188000	52644000	53305000	44050000	13	13	13	30.2	30.2	30.2	60.825	0	86.415	364480000	31	78202000	64935000	106340000	46075000	60100000	8831400	11045000	2369800	1967700	3222400	1396200	1821200	267620	8	7	11	1	3	1	By MS/MS	By MS/MS	By MS/MS	By MS/MS	By MS/MS	By MS/MS
Q0JNS6;Q0JNL7;A0A0P0XAH6;A0A0P0XAT9;Q8S1Y9	Q0JNS6;Q0JNL7;A0A0P0XAH6;A0A0P0XAT9;Q8S1Y9	Calmodulin-1;Calmodulin-3;Os07g0687200 protein	CAM1-1;CAM3;Os07	25457000	26848000	30139000	29473000	10529000	19003000	2	2	1	13.4	13.4	8.7	16.832	0	13.45	126190000	13	20211000	20497000	24400000	35619000	15291000	10172000	14021000	2245700	2277400	2711200	3957600	1699000	1130300	3	3	4	3	0	0	By MS/MS	By MS/MS	By MS/MS	By MS/MS	By matching	By matching
Q0JNQ7	Q0JNQ7	ATP-dependent Clp protease proteolytic subunit	Os01g0271400	0	0	0	0	0	9160200	1	1	1	3.4	3.4	3.4	32.259	0.0015456	6.8944	29331000	2	5415800	4625700	6932100	0	8766000	3591600	1955400	361050	308380	462140	0	584400	239440	0	0	1	0	1	0	By matching	By matching	By MS/MS		By MS/MS	By matching
Q0JPA6	Q0JPA6	Salt stress root protein RS1	Os01g0233000	25339000	29555000	32757000	35128000	34118000	39977000	4	4	4	36.8	36.8	36.8	21.801	0	33.005	181700000	18	17715000	25962000	39469000	32982000	49898000	15674000	13977000	1362700	1997100	3036100	2537000	3838300	1205700	3	3	4	4	2	2	By MS/MS	By MS/MS	By MS/MS	By MS/MS	By MS/MS	By MS/MS
Q0JQL0	Q0JQL0	Os01g0153400 protein (Fragment)	Os01g0153400	19038000	26134000	18978000	0	17246000	0	6	6	6	22.7	22.7	22.7	43.118	0	41.087	84533000	10	22716000	17026000	26962000	0	16689000	1139000	3842400	1032600	773920	1225600	0	758570	51774	2	4	2	0	2	0	By MS/MS	By MS/MS	By MS/MS		By MS/MS	By matching
Q0JR29	Q0JR29	Os01g0123900 protein	Os01g0123900	46041000	49973000	28019000	14163000	13091000	13741000	2	2	2	10.4	10.4	10.4	21.351	0	11.965	167040000	15	38370000	37100000	45927000	13994000	16206000	15442000	33408000	7674000	7420000	9185300	2798700	3241200	3088500	2	4	1	2	3	3	By MS/MS	By MS/MS	By MS/MS	By MS/MS	By MS/MS	By MS/MS
Q0JRG4	Q0JRG4	Os01g0102600 protein	Os01g0102600	9911200	9842400	10658000	0	9377000	0	2	2	2	13.4	13.4	13.4	29.617	0	14.386	46979000	4	9564800	7940100	12508000	1919000	11573000	3474300	3355600	683200	567150	893450	137070	826610	248160	1	1	1	0	1	0	By MS/MS	By MS/MS	By MS/MS	By matching	By MS/MS	By matching
Q7XMK8;Q6H7S2;Q109G2	Q7XMK8;Q6H7S2;Q109G2	DEAD-box ATP-dependent RNA helicase 6;DEAD-box ATP-dependent RNA helicase 8	Os04g0533000;Os02g0641800	0	0	3630400	0	0	0	1	1	1	2	2	2	56.71	0.0015588	6.9565	9860600	3	3284200	2711600	3864800	0	0	0	328690	109470	90386	128830	0	0	0	1	1	1	0	0	0	By MS/MS	By MS/MS	By MS/MS
Q10A14	Q10A14	Alanine--tRNA ligase	LOC_Os10g10244	74109000	89871000	84209000	47568000	47691000	66962000	12	12	12	15.5	15.5	15.5	109.41	0	88.876	374390000	28	83498000	73740000	95802000	37345000	56878000	27127000	7341000	1637200	1445900	1878500	732250	1115300	531890	8	8	9	1	0	2	By MS/MS	By MS/MS	By MS/MS	By MS/MS	By MS/MS	By MS/MS
Q10A77	Q10A77	Protein TIC 62, chloroplastic	TIC62	0	0	0	0	0	1074700	1	1	1	2.2	2.2	2.2	52.201	0.0016064	7.3202	7998800	3	2090300	1181100	2830200	791310	684560	421370	420990	110010	62163	148960	41648	36029	22177	1	1	1	0	0	0	By MS/MS	By MS/MS	By MS/MS	By matching	By matching	By matching
Q10AZ4	Q10AZ4	Actin-3	ACT3	94299000	107820000	83828000	113680000	80466000	110760000	12	3	1	41.6	12.5	3.4	41.705	0	25.61	536560000	32	95578000	91259000	98009000	101980000	107510000	42220000	25550000	4551400	4345700	4667100	4856000	5119700	2010500	7	6	4	6	4	5	By MS/MS	By MS/MS	By MS/MS	By MS/MS	By MS/MS	By MS/MS
Q10BT5	Q10BT5	Serine/threonine-protein phosphatase PP2A-2 catalytic subunit	PP2A2	48977000	41944000	45440000	58002000	42663000	39486000	5	5	2	22.8	22.8	11.1	35.242	0	37.608	261990000	22	51207000	39320000	49589000	52137000	55568000	14173000	16375000	3200500	2457500	3099300	3258600	3473000	885810	4	4	4	5	4	1	By MS/MS	By MS/MS	By MS/MS	By MS/MS	By MS/MS	By MS/MS
Q10CE4	Q10CE4	Peroxisomal (S)-2-hydroxy-acid oxidase GLO1	GLO1	1640300000	1206900000	1440100000	1233300000	1581700000	1035700000	18	18	12	63.4	63.4	39.8	40.383	0	159.27	8058400000	259	1605800000	1059800000	1573900000	1487900000	1809900000	521140000	366290000	72992000	48171000	71539000	67631000	82270000	23688000	58	57	58	29	37	20	By MS/MS	By MS/MS	By MS/MS	By MS/MS	By MS/MS	By MS/MS
Q10CG6	Q10CG6	AP complex subunit sigma	LOC_Os03g57040	0	0	0	0	0	3190900	1	1	1	8.1	8.1	8.1	18.648	0.0015256	6.7426	13076000	1	0	0	2142200	1362300	8320900	1251100	1634600	0	0	267780	170280	1040100	156390	0	0	0	0	1	0			By matching	By matching	By MS/MS	By matching
Q10CU9;A0A0N7KI20;Q94ED2;Q60EH3;Q10CU4	Q10CU9;A0A0N7KI20	Glycosyl hydrolase family 3 N terminal domain containing protein, expressed;Os03g0749300 protein (Fragment)	OSJNBa0069E14.7;Os03	84754000	75241000	78364000	12200000	20820000	17622000	8	8	8	18.4	18.4	18.4	67.777	0	65.275	285690000	30	83607000	64457000	79897000	9009400	45273000	3445600	12421000	3635100	2802500	3473800	391710	1968400	149810	9	9	8	0	4	0	By MS/MS	By MS/MS	By MS/MS	By matching	By MS/MS	By matching
Q10D68;A0A0P0W2R2	Q10D68;A0A0P0W2R2	Serine hydroxymethyltransferase;Serine hydroxymethyltransferase (Fragment)	LOC_Os03g52840;Os03g0738400	2854100000	2381000000	2567500000	1826000000	1713600000	2135700000	25	25	25	69.2	69.2	69.2	56.415	0	323.31	12982000000	476	2853700000	2072900000	2765100000	1828600000	2568800000	892380000	447640000	98405000	71481000	95350000	63057000	88580000	30772000	106	100	96	56	67	51	By MS/MS	By MS/MS	By MS/MS	By MS/MS	By MS/MS	By MS/MS
Q10DV7;Q0IPW3	Q10DV7;Q0IPW3	Actin-1;Os12g0163700 protein	ACT1;Os12g0163700	1073600000	1019600000	1055700000	1220600000	955310000	1085200000	14	14	3	48	48	9.8	41.812	0	161.55	6133300000	227	1103400000	962020000	1259200000	1067600000	1252900000	488230000	292060000	52541000	45810000	59962000	50838000	59662000	23249000	46	49	44	32	34	22	By MS/MS	By MS/MS	By MS/MS	By MS/MS	By MS/MS	By MS/MS
Q10DW3	Q10DW3	Os03g0717600 protein	LOC_Os03g50850	0	0	0	0	15387000	0	2	2	2	5.3	5.3	5.3	59.84	0	16.134	48270000	5	6620500	7758700	7450100	6469800	19971000	0	1856500	254630	298410	286540	248840	768100	0	1	1	2	0	1	0	By MS/MS	By MS/MS	By MS/MS	By matching	By MS/MS
Q10G12	Q10G12	Expressed protein	LOC_Os03g44560	0	0	4982700	0	0	0	1	1	1	6.1	6.1	6.1	26.074	0.00086207	8.4716	14482000	2	5236100	3941300	5304400	0	0	0	1114000	402780	303180	408030	0	0	0	1	0	1	0	0	0	By MS/MS	By matching	By MS/MS
Q10G39;A0A0P0W0N2;A0A0N7KHQ4	Q10G39;A0A0P0W0N2;A0A0N7KHQ4	Pyruvate dehydrogenase E1 component subunit beta-4, chloroplastic;Pyruvate dehydrogenase E1 component subunit beta (Fragment)	Os03g0645100;NA	21006000	31234000	20646000	0	0	0	5	2	2	15.5	8.5	8.5	42.876	0	16.269	68308000	8	20818000	28210000	19280000	0	0	0	3415400	1040900	1410500	963990	0	0	0	3	2	3	0	0	0	By MS/MS	By MS/MS	By MS/MS	By matching	By matching	By matching
Q10G81	Q10G81	Histone-binding protein MSI1 homolog	MSI1	0	0	6221300	0	0	0	1	1	1	3.3	3.3	3.3	48.359	0.00086655	8.7932	23345000	3	9682200	7039500	6622900	0	0	0	1296900	537900	391080	367940	0	0	0	1	1	1	0	0	0	By MS/MS	By MS/MS	By MS/MS
Q10GH8	Q10GH8	KH domain containing protein, expressed	LOC_Os03g42900	8725100	7275900	10546000	7454800	8848000	7905200	3	2	2	7.5	5.3	5.3	54.819	0	12.63	48778000	3	8411200	4503200	9059800	5912100	17322000	3570000	2709900	467290	250180	503320	328450	962310	198330	0	0	2	0	1	0	By matching	By matching	By MS/MS	By matching	By MS/MS	By matching
Q5VNM3;Q10I26	Q5VNM3;Q10I26	Eukaryotic initiation factor 4A-III homolog A;Eukaryotic initiation factor 4A-III homolog B	EIF4A3A;EIF4A3B	52614000	45930000	51898000	47179000	26074000	38485000	12	8	8	31.4	25	25	45.598	0	63.578	253130000	25	43386000	34519000	55589000	37391000	68784000	13458000	9735600	1668700	1327600	2138000	1438100	2645500	517600	9	5	6	2	3	0	By MS/MS	By MS/MS	By MS/MS	By MS/MS	By MS/MS	By matching
Q10L71;A0A0P0VYG1	Q10L71	Villin-2	VLN2	240350000	265770000	274980000	219060000	180500000	240660000	25	25	25	27.5	27.5	27.5	106.12	0	190.51	1331700000	123	269750000	241060000	322380000	170300000	252580000	75636000	25610000	5187500	4635800	6199600	3275100	4857300	1454500	28	30	35	12	13	5	By MS/MS	By MS/MS	By MS/MS	By MS/MS	By MS/MS	By MS/MS
Q10L93;Q850L8	Q10L93;Q850L8	50S ribosomal protein L6, putative, expressed;50S ribosomal protein L6, putative, expressed	LOC_Os03g24020;OSJNBa0032E21.12	116770000	130080000	139050000	199770000	166740000	240660000	7	7	7	38.1	38.1	38.1	24.885	0	70.357	885170000	40	109330000	98925000	107940000	230910000	238740000	99318000	80470000	9938700	8993200	9812700	20992000	21704000	9028900	7	5	8	5	11	4	By MS/MS	By MS/MS	By MS/MS	By MS/MS	By MS/MS	By MS/MS
Q10LF1	Q10LF1	Acyl carrier protein	LOC_Os03g22950	0	0	0	0	0	4499100	1	1	1	9.6	9.6	9.6	14.77	0.0029918	6.4934	23977000	2	3825000	4075000	5907800	4044200	4360700	1764100	5994200	956250	1018800	1477000	1011000	1090200	441010	0	1	1	0	0	0	By matching	By MS/MS	By MS/MS	By matching	By matching	By matching
Q10LK7	Q10LK7	ATP-dependent Clp protease proteolytic subunit	LOC_Os03g22430	0	5658500	0	0	0	0	2	2	2	4.1	4.1	4.1	37.023	0	13.44	16829000	2	5701000	4700900	1786300	0	0	4640600	841440	285050	235050	89313	0	0	232030	1	0	0	0	0	1	By MS/MS	By matching	By matching			By MS/MS
Q10LN7;Q6ZDW5	Q10LN7;Q6ZDW5	60S ribosomal protein L18, putative, expressed;Os07g0674700 protein	LOC_Os03g22180;P0618H09.15	0	9782900	0	0	0	0	4	2	2	23	14.4	14.4	21.074	0	14.757	54817000	2	8221600	8127300	3772600	12929000	18803000	2963400	6852100	1027700	1015900	471570	1616100	2350300	370420	1	0	0	1	0	0	By MS/MS	By matching	By matching	By MS/MS	By matching	By matching
Q10LP5	Q10LP5	Sucrose synthase 4	SUS4	13219000	12593000	10584000	0	0	0	5	3	3	6.7	5.4	5.4	92.216	0	19.842	61029000	7	13186000	10440000	11330000	0	21762000	4310300	1606000	347010	274740	298160	0	572690	113430	3	2	2	0	0	0	By MS/MS	By MS/MS	By MS/MS	By matching	By MS/MS	By matching
Q10LR5	Q10LR5	Fumarate hydratase 1, mitochondrial, putative, expressed	LOC_Os03g21950	79436000	82167000	86824000	68208000	117760000	88363000	12	12	12	42	42	42	53.682	0	122.13	495310000	47	106820000	84564000	110490000	35717000	127110000	30617000	19812000	4272700	3382600	4419400	1428700	5084300	1224700	9	9	10	4	10	5	By MS/MS	By MS/MS	By MS/MS	By MS/MS	By MS/MS	By MS/MS
Q10LR6;Q84NX8;A0A0P0X9Y2	Q10LR6;Q84NX8	Ribosomal protein L19;Ribosomal protein L19	LOC_Os03g21940;LOC_Os03g38260	40815000	48117000	44746000	52420000	36982000	28845000	4	4	4	25	25	25	24.141	0	26.392	230140000	20	48676000	40303000	51774000	35770000	37370000	16246000	38357000	8112700	6717200	8629000	5961700	6228300	2707600	4	6	5	2	2	1	By MS/MS	By MS/MS	By MS/MS	By MS/MS	By MS/MS	By MS/MS
Q10LR9;A0A0P0VXZ5	Q10LR9	Uroporphyrinogen decarboxylase 2, chloroplastic	Os03g0337600	26595000	26551000	23461000	0	44334000	0	6	6	6	23.1	23.1	23.1	42.844	0	42.243	138470000	18	34966000	27376000	31751000	10168000	30105000	4104600	7287900	1840300	1440900	1671100	535180	1584500	216030	7	4	5	1	1	0	By MS/MS	By MS/MS	By MS/MS	By MS/MS	By MS/MS	By matching
Q10LV9;Q7XHW8;A0A0P0VX12	Q10LV9	Eukaryotic translation initiation factor 2 beta subunit, putative, expressed	LOC_Os03g21550	24554000	29505000	24615000	25156000	23096000	18918000	5	5	5	20.7	20.7	20.7	30.548	0	35.501	141620000	25	23753000	19684000	16201000	32902000	42236000	6844800	10116000	1696600	1406000	1157200	2350200	3016900	488920	5	5	7	3	3	2	By MS/MS	By MS/MS	By MS/MS	By MS/MS	By MS/MS	By MS/MS
Q10LW5	Q10LW5	ATP-dependent transporter ycf16, putative, expressed	LOC_Os03g21490	33470000	34245000	32972000	20343000	20813000	23112000	5	5	5	22.5	22.5	22.5	33.355	0	33.848	155660000	18	40067000	34250000	42962000	8687700	23145000	6552200	11119000	2861900	2446500	3068700	620550	1653200	468010	6	6	6	0	0	0	By MS/MS	By MS/MS	By MS/MS	By matching	By MS/MS	By matching
Q10M12	Q10M12	Ricin B-like lectin R40C1	R40C1	25229000	18331000	21128000	16067000	13557000	14112000	3	3	3	12.9	12.9	12.9	38.822	0	17.829	100420000	9	22663000	18785000	21445000	12879000	18448000	6195800	4365900	985360	816730	932410	559980	802070	269380	4	2	2	1	0	0	By MS/MS	By MS/MS	By MS/MS	By MS/MS	By matching	By matching
Q10M57	Q10M57	14 kDa zinc-binding protein, putative, expressed	LOC_Os03g20630	0	0	0	0	2800700	0	1	1	1	13.2	13.2	13.2	14.195	0.00085324	8.261	26816000	2	5602700	5165700	6838700	5574400	3634900	0	3352000	700340	645720	854830	696800	454360	0	0	1	1	0	0	0	By matching	By MS/MS	By MS/MS	By matching	By matching
Q10M94	Q10M94	Glucose-6-phosphate 1-dehydrogenase	LOC_Os03g20300	87149000	104140000	112250000	93905000	134580000	62640000	13	12	12	24.6	22.7	22.7	70.776	0	87.92	580680000	47	106470000	96006000	126040000	72029000	156080000	24049000	17079000	3131500	2823700	3707200	2118500	4590500	707310	12	11	10	6	6	2	By MS/MS	By MS/MS	By MS/MS	By MS/MS	By MS/MS	By MS/MS
Q10MC6;A0A0P0VWP5	Q10MC6	Os03g0314100 protein	LOC_Os03g19960	32089000	33412000	33437000	23450000	28346000	23973000	8	8	8	21.1	21.1	21.1	62.705	0	58.281	164830000	25	32944000	33982000	41025000	14448000	33968000	8460900	4994800	998320	1029800	1243200	437830	1029300	256390	7	8	6	2	1	1	By MS/MS	By MS/MS	By MS/MS	By MS/MS	By MS/MS	By MS/MS
Q10MF8	Q10MF8	Enoyl-CoA hydratase/isomerase family protein, expressed	LOC_Os03g19680	118610000	115850000	125700000	96385000	100380000	141930000	8	8	8	38.1	38.1	38.1	28.889	0	89.139	627250000	50	129610000	114760000	145320000	73427000	110170000	53959000	36897000	7624400	6750800	8548100	4319200	6480300	3174100	11	9	14	6	7	3	By MS/MS	By MS/MS	By MS/MS	By MS/MS	By MS/MS	By MS/MS
Q10MJ1	Q10MJ1	Probable glutamyl endopeptidase, chloroplastic	GEP	20766000	26010000	22276000	0	20693000	19009000	4	4	4	7.9	7.9	7.9	103.89	0	28.827	100770000	15	20894000	23311000	25987000	4229100	17868000	8478400	2099300	435280	485650	541390	88106	372250	176630	4	4	4	1	1	1	By MS/MS	By MS/MS	By MS/MS	By MS/MS	By MS/MS	By MS/MS
Q10MK9	Q10MK9	AMP-binding enzyme family protein, expressed	LOC_Os03g19250	58116000	65966000	69678000	87677000	60074000	86797000	12	12	9	27.9	27.9	22.1	62.695	0	93.051	406940000	38	82757000	72949000	112300000	72966000	38537000	27431000	15652000	3182900	2805700	4319200	2806400	1482200	1055000	12	10	9	2	3	2	By MS/MS	By MS/MS	By MS/MS	By MS/MS	By MS/MS	By MS/MS
Q10MS5;Q0DSN8;Q8LJU5	Q10MS5;Q0DSN8	40S ribosomal protein S7;40S ribosomal protein S7	LOC_Os03g18570;Os03g0297300	36045000	58178000	32174000	84406000	34885000	0	3	3	3	29.7	29.7	29.7	22.183	0	28.474	270780000	18	41459000	41279000	44628000	70503000	55506000	17405000	38683000	5922800	5897000	6375400	10072000	7929400	2486400	2	5	2	4	3	2	By MS/MS	By MS/MS	By MS/MS	By MS/MS	By MS/MS	By MS/MS
Q10MT2	Q10MT2	Eukaryotic translation initiation factor 2 alpha subunit family protein, expressed	LOC_Os03g18510	131100000	134290000	142100000	92039000	155580000	141460000	8	8	8	28.3	28.3	28.3	38.234	0	67.597	767030000	52	128960000	106550000	176150000	58167000	248080000	49127000	38352000	6447800	5327600	8807500	2908400	12404000	2456400	13	12	13	3	7	4	By MS/MS	By MS/MS	By MS/MS	By MS/MS	By MS/MS	By MS/MS
Q10MW3;A0A0P0VX19;Q0D3D2;Q6AUJ8;Q0DHF6;Q9LGL5	Q10MW3;A0A0P0VX19	Pyruvate decarboxylase 2;Os03g0293500 protein (Fragment)	PDC2;Os03g0293500	154950000	155070000	153450000	126330000	94043000	125920000	10	10	10	22.6	22.6	22.6	64.718	0	84.267	753140000	57	151750000	140600000	177270000	99345000	135330000	48850000	35864000	7226000	6695400	8441200	4730700	6444400	2326200	14	14	13	5	6	5	By MS/MS	By MS/MS	By MS/MS	By MS/MS	By MS/MS	By MS/MS
Q10MW8	Q10MW8	Os03g0292800 protein	LOC_Os03g18180	19195000	17896000	16291000	16251000	0	14727000	3	3	3	24.9	24.9	24.9	23.429	0	23.476	81686000	17	22109000	19499000	23127000	9385000	4589700	2976100	6807200	1842500	1625000	1927200	782080	382480	248010	5	4	3	2	2	1	By MS/MS	By MS/MS	By MS/MS	By MS/MS	By MS/MS	By MS/MS
Q10MX3	Q10MX3	Asparagine synthetase [glutamine-hydrolyzing] 1	Os03g0291500	19831000	18275000	17793000	22902000	35444000	22943000	4	4	4	9.4	9.4	9.4	67.322	0	33.377	136080000	15	16444000	16074000	20150000	26616000	46099000	10697000	5233800	632450	618220	775000	1023700	1773000	411420	3	2	2	3	3	2	By MS/MS	By MS/MS	By MS/MS	By MS/MS	By MS/MS	By MS/MS
Q10MY3	Q10MY3	Os03g0289800 protein	LOC_Os03g18030	0	0	0	0	4623300	0	1	1	1	4.4	4.4	4.4	41.5	0.0022539	6.5792	19348000	1	6526200	6821700	0	0	6000500	0	1209300	407890	426350	0	0	375030	0	1	0	0	0	0	0	By MS/MS	By matching			By matching
Q10N17;A0A0P0VWW4	Q10N17;A0A0P0VWW4	Arogenate dehydratase;Arogenate dehydratase (Fragment)	LOC_Os03g17730;Os03g0286200	0	0	0	0	3341700	0	3	1	1	10.5	2.8	2.8	42.973	0.0069493	5.9698	24130000	3	5715000	6398700	7679600	0	4337100	0	1096800	259770	290850	349070	0	197140	0	1	1	1	0	0	0	By MS/MS	By MS/MS	By MS/MS	By matching	By matching	By matching
Q10N28	Q10N28	Os03g0284600 protein	LOC_Os03g17600	0	0	3674200	0	0	0	2	2	2	12.4	12.4	12.4	26.785	0	12.422	16676000	4	3390900	3560700	3911400	1875000	0	3937600	1042200	211930	222540	244460	117190	0	246100	1	1	1	0	0	1	By MS/MS	By MS/MS	By MS/MS	By matching		By MS/MS
Q10N30	Q10N30	Os03g0284400 protein	LOC_Os03g17580	25031000	24714000	26389000	30544000	84190000	25653000	5	5	5	28.6	28.6	28.6	24.221	0	41.612	210390000	25	46027000	38360000	59531000	18386000	40895000	7193700	13150000	2876700	2397500	3720700	1149200	2555900	449610	8	7	6	1	3	0	By MS/MS	By MS/MS	By MS/MS	By MS/MS	By MS/MS	By matching
Q10NA9;A0A0P0YBH9	Q10NA9	70 kDa heat shock protein	LOC_Os03g16860	440810000	425460000	404460000	373520000	270590000	386320000	22	11	7	49.5	28.6	20.9	71.1	0	137.43	2206900000	142	509490000	420790000	497490000	379700000	287790000	111620000	59645000	13770000	11373000	13446000	10262000	7778200	3016800	30	28	28	21	25	10	By MS/MS	By MS/MS	By MS/MS	By MS/MS	By MS/MS	By MS/MS
Q10NL7	Q10NL7	Expressed protein	LOC_Os03g15920	83613000	82871000	75477000	69104000	51710000	81859000	5	5	5	51.2	51.2	51.2	17.794	0	40.983	409900000	35	89162000	73134000	93665000	57075000	69470000	27399000	40990000	8916200	7313400	9366500	5707500	6947000	2739900	7	7	7	4	5	5	By MS/MS	By MS/MS	By MS/MS	By MS/MS	By MS/MS	By MS/MS
Q10NM5	Q10NM5	50S ribosomal protein L4, chloroplast, putative, expressed	LOC_Os03g15870	40217000	44901000	40209000	51654000	34737000	41384000	5	5	5	18	18	18	34.52	0	32.144	238900000	15	37258000	33242000	48005000	43325000	61529000	15542000	21718000	3387100	3022000	4364100	3938600	5593500	1412900	4	4	3	1	3	0	By MS/MS	By MS/MS	By MS/MS	By MS/MS	By MS/MS	By matching
Q10NQ9	Q10NQ9	Eukaryotic translation initiation factor NCBP	NCBP	0	0	3863900	0	0	0	1	1	1	4.8	4.8	4.8	26.598	0.004351	6.2419	7993200	1	0	3879800	4113300	0	0	0	666100	0	323320	342780	0	0	0	0	0	1	0	0	0		By matching	By MS/MS
Q10NX2;A0A0P0VVL1;Q7G466	Q10NX2	Os03g0255500 protein	LOC_Os03g15050	268650000	212770000	260650000	237150000	189750000	310440000	16	16	16	35.9	35.9	35.9	73.203	0	128.45	1347700000	73	242510000	201100000	252420000	231310000	300980000	119370000	33692000	6062700	5027500	6310500	5782600	7524500	2984100	15	13	19	7	15	4	By MS/MS	By MS/MS	By MS/MS	By MS/MS	By MS/MS	By MS/MS
Q10NY1	Q10NY1	Chorismate synthase	LOC_Os03g14990	80460000	83214000	75324000	95270000	54738000	88843000	9	9	9	37.4	37.4	37.4	46.924	0	79.761	434900000	41	86821000	53674000	89322000	105530000	66190000	33363000	20710000	4134300	2555900	4253400	5025300	3151900	1588700	9	9	8	5	6	4	By MS/MS	By MS/MS	By MS/MS	By MS/MS	By MS/MS	By MS/MS
Q10NY2	Q10NY2	Protein TPR3	TPR3	10569000	11872000	10400000	0	0	0	4	2	2	4.8	2.7	2.7	125.2	0	15.064	39187000	6	10499000	9985100	10989000	2028200	3169900	2515400	890600	238620	226930	249740	46095	72044	57169	2	2	2	0	0	0	By MS/MS	By MS/MS	By MS/MS	By matching	By matching	By matching
Q10NZ7	Q10NZ7	Os03g0253100 protein	LOC_Os03g14830	0	0	1848700	0	0	0	1	1	1	2.5	2.5	2.5	54.74	0.00693	5.9587	4914800	1	1471800	1474900	1968100	0	0	0	273040	81768	81939	109340	0	0	0	0	0	1	0	0	0	By matching	By matching	By MS/MS
Q10P27	Q10P27	40S ribosomal protein S20, putative, expressed	LOC_Os03g14530	0	0	0	0	0	0	3	1	1	25.2	10.2	10.2	13.958	0.00087032	9.5233	0	1	0	0	0	0	0	0	0	0	0	0	0	0	0	0	0	1	0	0	0	By matching	By matching	By MS/MS	By matching	By matching	By matching
Q10P35	Q10P35	Enolase 2, putative, expressed	LOC_Os03g14450	24828000	21349000	19923000	0	0	29624000	14	4	4	48.5	18.9	18.9	47.972	0	33.11	109670000	12	28748000	18256000	21114000	21605000	10078000	9867600	4569600	1197900	760690	879750	900210	419920	411150	3	3	3	2	0	1	By MS/MS	By MS/MS	By MS/MS	By MS/MS	By matching	By MS/MS
Q10PA8;A0A0P0YBU3	Q10PA8;A0A0P0YBU3	Expressed protein;Os12g0586400 protein	LOC_Os03g13770;Os12g0586400	0	0	5998000	0	0	0	2	2	2	4.9	4.9	4.9	62.59	0.00090992	11.332	20332000	2	3548700	3669000	6385200	3559000	3169800	0	813270	141950	146760	255410	142360	126790	0	1	1	0	0	0	0	By MS/MS	By MS/MS	By matching	By matching	By MS/MS
Q10PD0	Q10PD0	Purple acid phosphatase	LOC_Os03g13540	7125400	5573700	4331500	0	0	0	2	2	2	6.8	6.8	6.8	38.284	0.00092251	11.744	16251000	2	6630500	5157600	4462500	0	0	0	955920	390030	303390	262500	0	0	0	2	0	0	0	0	0	By MS/MS	By matching	By matching
Q10PV6	Q10PV6	50S ribosomal protein L15, chloroplast, putative, expressed	LOC_Os03g12020	26304000	29139000	36432000	39890000	23829000	22909000	6	6	6	21.3	21.3	21.3	27.877	0	37.118	174500000	18	22679000	19775000	48007000	31462000	44324000	8252100	12464000	1620000	1412500	3429100	2247300	3166000	589430	3	2	6	4	2	1	By MS/MS	By MS/MS	By MS/MS	By MS/MS	By MS/MS	By MS/MS
Q10PW2	Q10PW2	Tubulin alpha chain	TubA	23769000	26142000	18709000	0	33113000	0	10	5	5	29.4	16.5	16.5	50.06	0	50.615	146940000	11	18277000	13859000	16374000	12262000	83969000	2204300	6997400	870340	659950	779700	583900	3998500	104970	2	2	3	1	3	0	By MS/MS	By MS/MS	By MS/MS	By MS/MS	By MS/MS	By matching
Q10Q44	Q10Q44	Os03g0210400 protein	LOC_Os03g11200	4814500	0	3879100	0	0	0	2	2	2	3.8	3.8	3.8	87.193	0.00087796	10.503	29513000	2	5013900	2958600	3917300	5429600	11872000	322040	983780	167130	98619	130580	180990	395730	10735	1	0	1	0	0	0	By MS/MS	By matching	By MS/MS	By matching	By matching	By matching
Q10Q61	Q10Q61	ADP-glucose pyrophosphorylase	LOC_Os03g11050	0	0	0	0	3699100	0	1	1	1	2.9	2.9	2.9	45.754	0.0055866	5.99	18114000	0	4214700	3886500	5211900	0	4800900	0	787570	183250	168980	226600	0	208740	0	0	0	0	0	0	0	By matching	By matching	By MS/MS		By matching
Q5JKQ2;Q5JKQ3;Q10QF5	Q5JKQ2;Q5JKQ3;Q10QF5	Os01g0559100 protein;Os01g0559100 protein;Os03g0198400 protein	B1064G04.18-2;B1064G04.18-1;NA	0	0	0	0	0	7915700	1	1	1	6.2	6.2	6.2	45.443	0.0008726	9.7191	33435000	3	7327900	5844000	4271600	0	12887000	3103600	1285900	281840	224770	164290	0	495670	119370	1	1	1	0	0	0	By MS/MS	By MS/MS	By MS/MS		By matching	By matching
Q10QG2	Q10QG2	COP9 signalosome complex subunit 4, putative, expressed	LOC_Os03g10120	0	0	0	0	3424800	0	1	1	1	3.8	3.8	3.8	45.326	0.002994	6.5103	12949000	2	2819500	2790100	2894600	0	4445000	0	681540	148400	146850	152350	0	233940	0	1	1	0	0	0	0	By MS/MS	By MS/MS	By matching		By matching
Q10QH0	Q10QH0	Chloroplast 30S ribosomal protein S10, putative, expressed	LOC_Os03g10060	0	0	0	0	0	39766000	1	1	1	5.4	5.4	5.4	19.986	0.0056062	6.0147	224150000	2	46202000	31812000	49760000	37712000	43070000	15592000	37358000	7700300	5302000	8293300	6285300	7178400	2598600	0	0	0	0	1	1	By matching	By matching	By matching	By matching	By MS/MS	By MS/MS
Q10QN9	Q10QN9	Os03g0189600 protein	LOC_Os03g09020	29229000	19175000	18676000	0	14988000	12986000	3	3	3	12.7	12.7	12.7	40.361	0	21.678	100480000	8	28266000	18833000	24040000	9952000	15688000	3705300	5910800	1662700	1107800	1414100	585410	922800	217960	4	3	1	0	0	0	By MS/MS	By MS/MS	By MS/MS	By matching	By matching	By matching
Q10QU9;A0A0P0VTX8;C7IZV1;A0A0P0VYK0	Q10QU9;A0A0P0VTX8	40S ribosomal protein SA;Os03g0182600 protein	LOC_Os03g08440;Os03g0182600	79211000	86017000	85181000	103770000	109990000	131500000	5	5	2	25.9	25.9	10.8	33.143	0	75.195	581770000	43	95360000	80646000	111170000	88530000	165580000	40483000	41555000	6811400	5760400	7940900	6323600	11827000	2891600	7	8	9	5	9	5	By MS/MS	By MS/MS	By MS/MS	By MS/MS	By MS/MS	By MS/MS
Q10R17	Q10R17	Adenylosuccinate synthetase 1, chloroplastic	PURA1	44920000	47695000	45814000	27662000	30729000	38385000	9	9	9	27.5	27.5	27.5	52.135	0	65.746	218950000	27	48146000	40271000	58063000	14795000	43805000	13868000	9519500	2093300	1750900	2524500	643240	1904600	602980	8	7	8	1	2	1	By MS/MS	By MS/MS	By MS/MS	By MS/MS	By MS/MS	By MS/MS
Q10R90;A3C4N5	Q10R90;A3C4N5	Serine/threonine-protein phosphatase;Serine/threonine-protein phosphatase PP2A-4 catalytic subunit	LOC_Os03g07150;PP2A4	0	0	0	0	0	13260000	4	1	1	16.6	5.1	5.1	35.611	0.0008658	8.7754	60795000	4	13695000	10269000	12827000	8345900	10459000	5199200	4053000	912970	684620	855150	556390	697240	346610	1	0	1	1	1	0	By MS/MS	By matching	By MS/MS	By MS/MS	By MS/MS	By matching
Q10RI7	Q10RI7	DEAD-box ATP-dependent RNA helicase 38	Os03g0158200	6517800	6915800	12534000	3966600	6675800	5304000	3	3	3	10.1	10.1	10.1	55.854	0	21.964	43902000	5	5104900	4778200	7087000	1874700	23258000	1799500	1626000	189070	176970	262480	69434	861410	66650	1	0	2	0	2	0	By MS/MS	By matching	By MS/MS	By matching	By MS/MS	By matching
Q10RP0;A0A0P0VT75;A0A0P0XFK3	Q10RP0	Cell division cycle protein 48, putative, expressed	LOC_Os03g05730	81895000	88361000	99883000	127830000	139060000	110130000	15	15	12	26.5	26.5	21	89.743	0	107.21	632340000	50	72506000	66214000	102980000	113390000	237290000	39961000	13747000	1576200	1439400	2238700	2465000	5158400	868720	10	8	10	7	10	5	By MS/MS	By MS/MS	By MS/MS	By MS/MS	By MS/MS	By MS/MS
Q10RW9	Q10RW9	Chaperonin	LOC_Os03g04970	0	0	0	0	14271000	0	14	1	1	34.3	4	4	61.045	0.000819	7.6291	20792000	1	2270100	0	0	0	18522000	0	611530	66766	0	0	0	544760	0	0	0	0	0	1	0	By matching	By matching	By matching	By matching	By MS/MS	By matching
Q10S34;A0A0P0VSS6	Q10S34	Aconitate hydratase	LOC_Os03g04410	176850000	177090000	176850000	172090000	190820000	175800000	17	17	15	25.4	25.4	22.4	106.3	0	126.43	999280000	86	197540000	152650000	214510000	131050000	234490000	69035000	21261000	4202900	3247900	4564000	2788400	4989200	1468800	25	22	20	8	9	2	By MS/MS	By MS/MS	By MS/MS	By MS/MS	By MS/MS	By MS/MS
Q10S82	Q10S82	Catalase isozyme C	CATC	606770000	534250000	530660000	495640000	366910000	625680000	17	16	14	43.3	41.7	39.4	56.763	0	132.62	2943700000	171	736390000	563440000	704620000	362960000	399040000	177300000	133810000	33472000	25611000	32028000	16498000	18138000	8059000	47	41	38	15	16	14	By MS/MS	By MS/MS	By MS/MS	By MS/MS	By MS/MS	By MS/MS
Q10S92	Q10S92	EF hand family protein, expressed	LOC_Os03g03830	0	10644000	0	0	7584100	0	2	2	2	2.4	2.4	2.4	113.63	0	13.474	51485000	2	9567400	8796600	10485000	8800700	9915400	3919500	990090	183990	169160	201640	169240	190680	75374	0	1	0	0	1	0	By matching	By MS/MS	By matching	By matching	By MS/MS	By matching
Q10SD6	Q10SD6	Anthranilate phosphoribosyltransferase, chloroplast, putative, expressed	LOC_Os03g03450	7702800	7477100	10614000	11778000	14501000	7964000	4	4	4	13.4	13.4	13.4	41.566	0	25.097	63666000	9	6904400	5449300	7368400	13067000	29369000	1507600	2893900	313840	247700	334930	593970	1335000	68526	1	2	2	2	2	0	By MS/MS	By MS/MS	By MS/MS	By MS/MS	By MS/MS	By matching
Q10SL6;Q10SL7;A0A0P0VSI0	Q10SL6;Q10SL7	Dihydrodipicolinate reductase, C-terminus family protein, expressed;Dihydrodipicolinate reductase, C-terminus family protein, expressed	LOC_Os03g02690;NA	8289700	12296000	8517600	0	0	7481100	3	3	3	13	13	13	32.168	0	16.052	30104000	3	8612200	8369900	9462700	127310	0	3532300	2315700	662480	643830	727900	9793	0	271710	0	2	1	0	0	0	By matching	By MS/MS	By MS/MS	By matching		By matching
Q10SM5	Q10SM5	Glycosyl hydrolases family 16 protein, expressed	LOC_Os03g02610	15033000	19690000	16363000	0	0	0	4	4	4	19.6	19.6	19.6	32.945	0	28.808	73136000	6	16631000	14922000	17558000	18280000	3699000	2046400	6094700	1385900	1243500	1463100	1523300	308250	170530	2	2	0	1	1	0	By MS/MS	By MS/MS	By matching	By MS/MS	By MS/MS	By matching
Q10SM6;B7E8M5	Q10SM6	Os03g0117200 protein	LOC_Os03g02600	22587000	28143000	20928000	0	20252000	22792000	4	4	4	14.7	14.7	14.7	45.527	0	30.123	116100000	16	27660000	28960000	27004000	9386000	17144000	5947500	5277400	1257300	1316400	1227500	426640	779290	270340	5	5	5	1	0	0	By MS/MS	By MS/MS	By MS/MS	By MS/MS	By matching	By matching
Q10T41;Q10T42	Q10T41;Q10T42	Formyl transferase family protein, expressed;(RAP Annotation release2) Formyltetrahydrofolate deformylase family protein	LOC_Os03g01222;NA	16626000	23558000	15525000	19100000	12748000	14175000	3	3	3	16	16	16	32.961	0	23.251	99222000	9	16495000	13909000	14132000	21395000	28799000	4490900	5512400	916410	772740	785120	1188600	1600000	249500	2	2	2	2	1	0	By MS/MS	By MS/MS	By MS/MS	By MS/MS	By MS/MS	By matching
Q10T66	Q10T66	Expressed protein	LOC_Os03g01030	158770000	166430000	139310000	121850000	82507000	114640000	6	6	6	51.2	51.2	51.2	21.976	0	67.666	735680000	51	163210000	128450000	165830000	103910000	133900000	40382000	66880000	14837000	11677000	15075000	9446000	12173000	3671100	14	13	12	4	4	4	By MS/MS	By MS/MS	By MS/MS	By MS/MS	By MS/MS	By MS/MS
Q2QLI3	Q2QLI3	Expressed protein	LOC_Os12g44370	0	0	3423200	0	0	0	1	1	1	3.3	3.3	3.3	36.607	0.00083333	7.8859	10487000	2	3239500	3603300	3644200	0	0	0	616880	190560	211960	214370	0	0	0	1	1	0	0	0	0	By MS/MS	By MS/MS	By MS/MS
Q2QLR2	Q2QLR2	Glycine-rich RNA-binding protein GRP1A, putative, expressed	LOC_Os12g43600	25087000	18800000	18386000	53658000	54006000	48489000	4	4	2	35.8	35.8	24.1	16.083	0	42.29	210810000	15	17774000	11468000	15112000	62508000	87368000	16585000	19165000	1615800	1042500	1373800	5682500	7942500	1507700	3	2	2	3	2	3	By MS/MS	By MS/MS	By MS/MS	By MS/MS	By MS/MS	By MS/MS
Q2QLY5;A0A0P0YCC8;A0A0P0YCK4	Q2QLY5;A0A0P0YCC8	5-methyltetrahydropteroyltriglutamate--homocysteine methyltransferase 1;Os12g0623900 protein (Fragment)	Os12g0623900;Os12g0623900	428650000	458680000	440640000	456980000	343150000	393720000	15	15	4	31.2	31.2	8.9	84.584	0	227.66	2381600000	125	439610000	361930000	435860000	384120000	609300000	150770000	62673000	11569000	9524600	11470000	10108000	16034000	3967700	27	21	23	21	18	15	By MS/MS	By MS/MS	By MS/MS	By MS/MS	By MS/MS	By MS/MS
Q2QM23;A0A0P0YC74;A0A0N7KUD7	Q2QM23;A0A0P0YC74	Methyl-CpG binding domain containing protein, expressed;Os12g0620400 protein (Fragment)	LOC_Os12g42550;Os12g0620400	23782000	21220000	29848000	20224000	17982000	14927000	7	7	7	36	36	36	31.51	0	43.827	122020000	12	25964000	19825000	30091000	14930000	25152000	6058900	6779000	1442500	1101400	1671700	829440	1397300	336600	4	1	6	1	0	0	By MS/MS	By MS/MS	By MS/MS	By MS/MS	By matching	By matching
Q2QM55	Q2QM55	Pyruvate dehydrogenase E1 component subunit beta-3, chloroplastic	Os12g0616900	35006000	34520000	31919000	0	0	0	5	5	2	15.9	15.9	8.7	42.12	0	36.19	150050000	21	19691000	29791000	48857000	20117000	25209000	6384700	7897300	1036400	1568000	2571400	1058800	1326800	336040	7	5	6	1	1	1	By MS/MS	By MS/MS	By MS/MS	By MS/MS	By MS/MS	By MS/MS
Q2QM62	Q2QM62	Kinesin-like protein KIN-14R	KIN14R	0	0	0	0	0	268060000	1	1	1	0.7	0.7	0.7	109.66	0.0076019	5.9497	528690000	19	69294000	62547000	93806000	197940000	0	105100000	10367000	1358700	1226400	1839300	3881200	0	2060800	5	6	6	1	0	1	By MS/MS	By MS/MS	By MS/MS	By MS/MS		By MS/MS
Q2QME5;A0A0P0YBZ8	Q2QME5;A0A0P0YBZ8	Eukaryotic translation initiation factor 2 gamma subunit, putative, expressed;Os12g0607100 protein (Fragment)	LOC_Os12g41400;Os1	0	0	0	0	0	23260000	9	1	1	24.6	3.9	3.9	50.737	0.00087873	10.6	95457000	3	27701000	6014400	20503000	27309000	3539000	10391000	4772800	1385000	300720	1025100	1365400	176950	519560	0	0	2	1	0	0	By matching	By matching	By MS/MS	By MS/MS	By matching	By matching
Q2QMG2;A0A0P0YBZ2;A0A0P0YCK7	Q2QMG2;A0A0P0YBZ2	Methylcrotonoyl-CoA carboxylase subunit alpha, mitochondrial;Os12g0605800 protein (Fragment)	MCCA;Os12g0605800	218000000	206560000	218430000	165510000	109460000	117330000	18	18	18	36.9	36.9	36.9	80.283	0	144.16	958490000	73	205790000	156460000	196460000	149460000	186820000	63496000	25223000	5415600	4117500	5170000	3933200	4916300	1670900	18	16	17	8	10	4	By MS/MS	By MS/MS	By MS/MS	By MS/MS	By MS/MS	By MS/MS
Q2QN11	Q2QN11	Eukaryotic aspartyl protease family protein, expressed	LOC_Os12g39360	50683000	50060000	38484000	35189000	35414000	43668000	3	3	3	10.3	10.3	10.3	46.238	0	23.8	233370000	16	46334000	40850000	38093000	27188000	62675000	18233000	14586000	2895900	2553100	2380800	1699300	3917200	1139600	4	4	3	1	3	1	By MS/MS	By MS/MS	By MS/MS	By MS/MS	By MS/MS	By MS/MS
Q2QN86	Q2QN86	Expressed protein	LOC_Os12g38640	0	0	5887900	0	0	0	1	1	1	7.4	7.4	7.4	19.347	0.001576	7.0889	16819000	2	5528300	5022800	6268000	0	0	0	2102400	691030	627850	783500	0	0	0	1	0	1	0	0	0	By MS/MS	By matching	By MS/MS
Q2QNF3	Q2QNF3	60S ribosomal protein L2	LOC_Os12g38000	67447000	67371000	76124000	65910000	76318000	71099000	4	4	4	20.7	20.7	20.7	28.249	0	42.89	408000000	41	59801000	55399000	83252000	76222000	104430000	28902000	29143000	4271500	3957100	5946600	5444500	7459100	2064400	5	5	8	7	10	6	By MS/MS	By MS/MS	By MS/MS	By MS/MS	By MS/MS	By MS/MS
Q2QNF7	Q2QNF7	Diaminopimelate epimerase, chloroplastic	DAPF	26040000	25553000	31795000	16368000	19550000	19606000	3	3	3	12.1	12.1	12.1	37.83	0	24.87	133960000	12	26470000	23191000	33887000	17676000	26704000	6028100	7442000	1470500	1288400	1882600	982010	1483600	334890	4	3	3	0	2	0	By MS/MS	By MS/MS	By MS/MS	By MS/MS	By MS/MS	By matching
Q2QNG2	Q2QNG2	GDSL-like Lipase/Acylhydrolase family protein, expressed	LOC_Os12g37910	0	0	0	0	0	7851500	1	1	1	4.5	4.5	4.5	42.416	0.0069444	5.9675	24797000	1	2979200	2741300	4638100	0	11360000	3078500	1377600	165510	152290	257670	0	631090	171030	1	0	0	0	0	0	By MS/MS	By matching	By matching		By matching	By matching
Q2QNG7;A0A0P0Y5P9	Q2QNG7	ATP-citrate synthase alpha chain protein 3	ACLA-3	45225000	47201000	53376000	36051000	30530000	21308000	4	4	2	11.8	11.8	6.9	46.794	0	30.817	226610000	28	40123000	34854000	45650000	33506000	61572000	10903000	14163000	2507700	2178400	2853100	2094100	3848200	681450	6	5	3	6	8	0	By MS/MS	By MS/MS	By MS/MS	By MS/MS	By MS/MS	By matching
Q9SDK4;Q2QNM5;Q93W16	Q9SDK4;Q2QNM5;Q93W16	GTP-binding protein;GTP-binding protein SAR1A, putative, expressed	GBP;LOC_Os12g37360	0	0	0	17393000	18304000	0	2	2	2	16.6	16.6	16.6	21.944	0	14.683	65096000	5	5977600	7169400	8567900	16170000	25166000	2044600	5007400	459820	551500	659070	1243900	1935900	157280	1	1	1	0	2	0	By MS/MS	By MS/MS	By MS/MS	By matching	By MS/MS	By matching
Q2QNN5;A0A0P0YB83;A0A0N7KU75	Q2QNN5;A0A0P0YB83	Lipoxygenase;Lipoxygenase (Fragment)	LOC_Os12g37260;Os12g0559200	368590000	395060000	358710000	646330000	659530000	617360000	22	22	22	31.6	31.6	31.6	104.69	0	250.07	2979200000	172	408290000	364300000	506780000	543770000	962160000	193880000	60800000	8332500	7434600	10342000	11097000	19636000	3956800	34	35	28	28	31	16	By MS/MS	By MS/MS	By MS/MS	By MS/MS	By MS/MS	By MS/MS
Q2QNS7	Q2QNS7	Os12g0555500 protein	LOC_Os12g36880	0	0	0	0	0	2083800	1	1	1	5.7	5.7	5.7	16.688	0.0050072	6.1292	18122000	4	2667100	1806900	2952900	6001900	3876000	817030	1647400	242460	164270	268450	545630	352370	74275	1	1	1	1	0	0	By MS/MS	By MS/MS	By MS/MS	By MS/MS	By MS/MS	By matching
Q2QNV2	Q2QNV2	Fiber protein Fb19, putative, expressed	LOC_Os12g36640	61292000	56249000	55647000	48138000	81725000	44980000	4	4	4	34.3	34.3	34.3	18.101	0	38.889	341550000	30	62849000	50982000	63796000	46124000	102850000	14949000	37950000	6983200	5664700	7088400	5124800	11428000	1661000	5	9	6	4	3	3	By MS/MS	By MS/MS	By MS/MS	By MS/MS	By MS/MS	By MS/MS
Q2QP54;A0A0P0YBF5;A0A0P0YAX3;A0A0P0YB77;A0A0P0YAX2	Q2QP54;A0A0P0YBF5	Elongation factor Ts, mitochondrial;Elongation factor Ts (Fragment)	EFTS;Os12g0541500	58000000	65608000	62679000	54720000	35648000	56245000	10	10	10	12.6	12.6	12.6	121.09	0	85.401	306360000	27	59501000	52555000	60523000	43756000	67669000	22358000	6382500	1239600	1094900	1260900	911580	1409800	465790	4	7	7	4	4	1	By MS/MS	By MS/MS	By MS/MS	By MS/MS	By MS/MS	By MS/MS
Q2QPD1	Q2QPD1	Acyl carrier protein	LOC_Os12g34890	0	0	0	0	0	0	1	1	1	11.1	11.1	11.1	15.532	0.00083403	7.8929	0	2	0	0	0	0	0	0	0	0	0	0	0	0	0	0	2	0	0	0	0		By MS/MS
Q2QPD4	Q2QPD4	Os12g0533700 protein	LOC_Os12g34860	34800000	34715000	25662000	7356600	7737300	11019000	4	4	4	11.2	11.2	11.2	51.165	0	25.196	106010000	14	13252000	22910000	33224000	13758000	12882000	9979900	3926100	490800	848520	1230500	509560	477110	369630	2	4	4	1	2	1	By MS/MS	By MS/MS	By MS/MS	By MS/MS	By MS/MS	By MS/MS
Q2QQ48	Q2QQ48	Eukaryotic translation initiation factor 5A	LOC_Os12g32240	141090000	186620000	50390000	208290000	0	193330000	6	2	2	45	22.5	22.5	17.557	0	19.663	822230000	22	128820000	135790000	159060000	149840000	175420000	73294000	74748000	11711000	12344000	14460000	13622000	15947000	6663100	6	6	4	2	2	2	By MS/MS	By MS/MS	By MS/MS	By MS/MS	By MS/MS	By MS/MS
Q2QS11;A0A0P0Y9S4	Q2QS11	Bifunctional aminoacyl-tRNA synthetase, putative, expressed	LOC_Os12g25710	18879000	18511000	20854000	16138000	14047000	16478000	5	5	5	13.7	13.7	13.7	57.95	0	33.389	95892000	9	26949000	20435000	25123000	9115500	8889100	5379100	2996600	842170	638600	785110	284860	277780	168100	3	3	3	0	0	0	By MS/MS	By MS/MS	By MS/MS	By MS/MS	By matching	By matching
Q2QS13;B7F958	Q2QS13	UDP-glucose 6-dehydrogenase 5	UGD5	0	0	0	0	9760700	0	12	1	1	29	2.5	2.5	52.918	0.001586	7.1517	18882000	2	0	0	6214200	0	12668000	0	651110	0	0	214280	0	436830	0	0	0	1	0	1	0	By matching	By matching	By MS/MS	By matching	By MS/MS	By matching
Q2QS14	Q2QS14	UDP-glucose 6-dehydrogenase 4	UGD4	429700000	430740000	506970000	550670000	551450000	720560000	14	14	1	37.1	37.1	3.5	52.854	0	205.68	2992400000	151	460350000	415800000	586960000	448530000	803260000	277500000	106870000	16441000	14850000	20963000	16019000	28688000	9910600	30	27	29	17	33	15	By MS/MS	By MS/MS	By MS/MS	By MS/MS	By MS/MS	By MS/MS
Q2QSR7;A0A0P0Y9F9	Q2QSR7;A0A0P0Y9F9	Os12g0420200 protein;Os12g0420200 protein (Fragment)	LOC_Os12g23180;Os12g0420200	697300000	579740000	559550000	598290000	505470000	574260000	18	18	18	53.7	53.7	53.7	41.532	0	207.64	3234100000	193	668120000	519520000	635770000	547650000	631980000	231010000	140610000	29049000	22588000	27642000	23811000	27478000	10044000	46	41	41	19	27	19	By MS/MS	By MS/MS	By MS/MS	By MS/MS	By MS/MS	By MS/MS
Q2QT32	Q2QT32	Serine hydroxymethyltransferase	LOC_Os12g22030	23917000	26752000	25688000	14811000	16563000	16806000	8	5	5	22.4	13.9	13.9	58.207	0	31.315	124100000	16	23947000	19056000	32236000	7024100	37311000	4524100	5395600	1041200	828540	1401600	305390	1622200	196700	4	3	6	1	2	0	By MS/MS	By MS/MS	By MS/MS	By MS/MS	By MS/MS	By matching
Q2QTC2;A0A0P0Y9F7	Q2QTC2	Phosphoglucan, water dikinase, chloroplastic	GWD3	42087000	39335000	38514000	27551000	21871000	27094000	11	11	11	14.3	14.3	14.3	132.89	0	73.677	180030000	21	41518000	44949000	47394000	18338000	18630000	9199800	2687000	619670	670880	707370	273700	278060	137310	6	6	7	1	1	0	By MS/MS	By MS/MS	By MS/MS	By MS/MS	By MS/MS	By matching
Q2QTL0	Q2QTL0	Quinolinate synthase, chloroplastic	Os12g0290150	7995400	8354100	7241700	0	0	0	2	2	2	3.4	3.4	3.4	76.682	0	12.159	26676000	2	7778200	7168700	7647700	1719000	1770400	591790	889190	259270	238960	254920	57300	59012	19726	0	0	2	0	0	0	By matching	By matching	By MS/MS	By matching	By matching	By matching
Q2QU06;A0A0P0Y903;A0A0P0Y8X9;A0A0P0Y925;C7J056	Q2QU06;A0A0P0Y903;A0A0P0Y8X9;A0A0P0Y925	60 kDa chaperonin alpha subunit;Os12g0277500 protein (Fragment)	LOC_Os12g17910;Os12g0277500	514750000	565580000	529740000	429670000	421920000	458450000	25	25	22	58	58	52.9	61.129	0	259.82	2767000000	176	543590000	453650000	471920000	484780000	608670000	204360000	81382000	15988000	13343000	13880000	14258000	17902000	6010700	42	40	40	22	18	14	By MS/MS	By MS/MS	By MS/MS	By MS/MS	By MS/MS	By MS/MS
Q2QUD2	Q2QUD2	Cyclopropane fatty acid synthase, putative, expressed	LOC_Os12g16650	0	0	0	0	5503900	0	1	1	1	1.2	1.2	1.2	94.751	0.0089286	5.9174	58017000	2	13671000	10291000	22233000	4678100	7143300	0	1450400	341790	257260	555840	116950	178580	0	1	1	0	0	0	0	By MS/MS	By MS/MS	By matching	By matching	By matching
Q2QV45;A0A0P0Y952;A0A0P0Y8M7;A0A0P0Y8U7	Q2QV45;A0A0P0Y952	70 kDa heat shock protein;Os12g0244100 protein (Fragment)	LOC_Os12g14070;Os12g0244100	100590000	119050000	135740000	91358000	114220000	116300000	13	13	10	22.8	22.8	19.6	74.086	0	89.932	616650000	49	105190000	83598000	135710000	99611000	136690000	55849000	16228000	2768300	2200000	3571300	2621300	3597200	1469700	11	10	11	5	8	4	By MS/MS	By MS/MS	By MS/MS	By MS/MS	By MS/MS	By MS/MS
Q2QVA7	Q2QVA7	Os12g0236900 protein	LOC_Os12g13460	25549000	31082000	18477000	0	0	0	5	5	5	15.3	15.3	15.3	56.525	0	38.416	120560000	11	27484000	27747000	15142000	0	44592000	5594900	6697800	1526900	1541500	841230	0	2477400	310830	3	3	3	0	2	0	By MS/MS	By MS/MS	By MS/MS		By MS/MS	By matching
Q2QVG9;Q53LY0;Q7XL03;Q6H795;Q0E3C8	Q2QVG9	Chaperone protein ClpC2, chloroplastic	CLPC2	343810000	347200000	343480000	430420000	409500000	434310000	30	30	13	42.5	42.5	18.5	102.02	0	321.6	2345000000	178	416780000	360920000	428230000	420880000	562370000	155810000	48854000	8682800	7519300	8921400	8768200	11716000	3245900	31	30	34	28	36	19	By MS/MS	By MS/MS	By MS/MS	By MS/MS	By MS/MS	By MS/MS
Q2QVJ6	Q2QVJ6	NADP-dependent oxidoreductase P2, putative, expressed	LOC_Os12g12580	23529000	30687000	16716000	58560000	115930000	59930000	4	4	4	17.6	17.6	17.6	38.367	0	30.209	305820000	13	23535000	24011000	17143000	57239000	162880000	21010000	17989000	1384400	1412400	1008400	3367000	9581300	1235900	2	2	3	2	3	1	By MS/MS	By MS/MS	By MS/MS	By MS/MS	By MS/MS	By MS/MS
Q2QWN3	Q2QWN3	Os12g0189400 protein	LOC_Os12g08770	0	0	0	0	3426500	0	1	1	1	6.7	6.7	6.7	15.915	0.0015625	6.9821	4447100	1	0	0	0	0	4447100	0	444710	0	0	0	0	444710	0	0	0	0	0	1	0					By MS/MS
Q2QWP2	Q2QWP2	Expressed protein	LOC_Os12g08700	0	0	0	0	0	0	1	1	1	5.3	5.3	5.3	14.12	0.0056378	6.028	0	1	0	0	0	0	0	0	0	0	0	0	0	0	0	0	0	0	1	0	0				By MS/MS
Q2QWT8;A0A0P0Y7U2;A0A0P0Y7X2	Q2QWT8;A0A0P0Y7U2	2-oxoisovalerate dehydrogenase alpha subunit, mitochondrial, putative, expressed;Os12g0183100 protein	LOC_Os12g08260;Os12g018310	50836000	46664000	50586000	35488000	43250000	47200000	7	7	7	20.2	20.2	20.2	54.041	0	48.024	252590000	25	59732000	51896000	65791000	23610000	35106000	16454000	12629000	2986600	2594800	3289500	1180500	1755300	822680	7	6	7	1	2	2	By MS/MS	By MS/MS	By MS/MS	By MS/MS	By MS/MS	By MS/MS
Q2QWU7;A0A0P0Y7M5	Q2QWU7;A0A0P0Y7M5	Dihydrolipoamide acetyltransferase component of pyruvate dehydrogenase complex;Os12g0182200 protein (Fragment)	LOC_Os12g08170;Os	38484000	34832000	34978000	43215000	38972000	40539000	6	6	5	21	21	17.8	48.36	0	49.999	211060000	20	43999000	43438000	49311000	24641000	35466000	14209000	10051000	2095200	2068500	2348200	1173400	1688900	676610	7	4	6	1	1	1	By MS/MS	By MS/MS	By MS/MS	By MS/MS	By MS/MS	By MS/MS
Q2QWZ1	Q2QWZ1	Eukaryotic translation initiation factor 2 gamma subunit, putative, expressed	LOC_Os12g07740	135340000	132100000	124310000	96097000	88274000	129470000	9	9	1	24.6	24.6	3.9	50.607	0	81.829	645020000	54	155710000	131190000	149520000	76130000	91648000	40827000	33949000	8195000	6904900	7869500	4006800	4823600	2148800	15	13	12	5	5	4	By MS/MS	By MS/MS	By MS/MS	By MS/MS	By MS/MS	By MS/MS
Q2QX01	Q2QX01	Monothiol glutaredoxin-S12, chloroplastic	GRXS12	99626000	106610000	113890000	93133000	95531000	108150000	6	6	6	26.7	26.7	26.7	30.589	0	48.863	573330000	49	107080000	84795000	131260000	96827000	114790000	38580000	33725000	6298900	4988000	7721300	5695700	6752200	2269400	12	9	12	6	6	4	By MS/MS	By MS/MS	By MS/MS	By MS/MS	By MS/MS	By MS/MS
Q2QX16	Q2QX16	Expressed protein	LOC_Os12g07500	0	0	0	0	6083100	0	1	1	1	4.1	4.1	4.1	40.497	0.0082816	5.9433	11927000	1	3044100	802460	185540	0	7895000	0	596360	152210	40123	9277	0	394750	0	1	0	0	0	0	0	By MS/MS	By matching	By matching		By matching
Q2QX45	Q2QX45	Calcium-dependent protein kinase 28	CPK28	0	0	0	0	4954700	0	2	1	1	6.5	3.6	3.6	57.988	0.00082372	7.7373	25229000	3	6399200	6023500	6375800	0	6430600	0	1009200	255970	240940	255030	0	257220	0	1	1	1	0	0	0	By MS/MS	By MS/MS	By MS/MS		By matching
Q2QXA8	Q2QXA8	Os12g0163800 protein	LOC_Os12g06670	0	0	0	0	0	1226000	1	1	1	2.8	2.8	2.8	58.255	0.0015686	7.0285	5507200	1	0	0	0	1863000	3163500	480680	177650	0	0	0	60096	102050	15506	0	0	0	0	1	0				By matching	By MS/MS	By matching
Q2QXN5;Q53Q51;Q5ZDH6	Q2QXN5;Q53Q51	60S ribosomal protein L26-1, putative, expressed;Os11g0151300 protein	LOC_Os12g05430;LOC_Os11g05370	8661200	8682600	19911000	18295000	36710000	12988000	3	3	3	22.7	22.7	22.7	16.93	0	20.733	106520000	9	9600000	8225900	23432000	20619000	39841000	4801500	17753000	1600000	1371000	3905300	3436500	6640200	800240	1	0	2	1	4	1	By MS/MS	By MS/MS	By MS/MS	By MS/MS	By MS/MS	By MS/MS
Q2RAP8;Q2QXY9;A0A0P0YCF4	Q2RAP8;Q2QXY9	2-isopropylmalate synthase B, putative, expressed;2-isopropylmalate synthase B, putative, expressed	LOC_Os11g04670;LOC_Os12g04440	144830000	162470000	159030000	155670000	149370000	144800000	17	17	17	36.7	36.7	36.7	68.447	0	139.09	869450000	84	163810000	156970000	194980000	130180000	174840000	48669000	22294000	4200300	4024900	4999400	3338100	4483100	1247900	18	17	22	11	9	7	By MS/MS	By MS/MS	By MS/MS	By MS/MS	By MS/MS	By MS/MS
Q6ZX06;Q2QYK8	Q6ZX06;Q2QYK8	Non-specific lipid-transfer protein;Non-specific lipid-transfer protein	ltp2;LOC_Os12g02340	0	0	0	0	0	6775500	1	1	1	11	11	11	11.527	0.00084459	8.061	49786000	8	8536700	5367600	9791500	11681000	11752000	2656600	8297600	1422800	894600	1631900	1946800	1958700	442770	2	2	2	1	1	0	By MS/MS	By MS/MS	By MS/MS	By MS/MS	By MS/MS	By MS/MS
Q2RBN7;Q2QYW2;A0A0P0Y653;A0A0P0XY01;A0A0P0XY45	Q2RBN7;Q2QYW2	Clathrin heavy chain 1;Clathrin heavy chain 2	Os11g0104900;Os12g0104800	27445000	31224000	28813000	52697000	52386000	59575000	11	11	11	8.7	8.7	8.7	193.34	0	75.586	229150000	28	30506000	28169000	32534000	42497000	72535000	22907000	2490700	331580	306180	353630	461920	788430	248990	5	5	4	3	8	3	By MS/MS	By MS/MS	By MS/MS	By MS/MS	By MS/MS	By MS/MS
Q53JY8;Q2QZ86	Q53JY8;Q2QZ86	ATP-citrate synthase subunit alpha chain protein 1;ATP-citrate synthase alpha chain protein 2	ACLA-1;ACLA-2	0	0	7103200	0	0	0	3	1	1	8.8	3.7	3.7	45.004	0.00083472	7.9	18748000	3	6739200	4446700	7561800	0	0	0	1102800	396420	261570	444810	0	0	0	1	1	1	0	0	0	By MS/MS	By MS/MS	By MS/MS	By matching	By matching	By matching
Q2R068	Q2R068	Os11g0657100 protein	LOC_Os11g43600	0	2536300	4452500	0	0	0	2	2	2	3.8	3.8	3.8	46.894	0.00089686	11.051	8029800	2	607600	2085800	4767300	183460	0	385680	364990	27618	94808	216700	8338.9	0	17531	0	0	2	0	0	0	By matching	By matching	By MS/MS	By matching		By matching
Q2R0H3	Q2R0H3	Dirigent protein	LOC_Os11g42550	27378000	23328000	31222000	53059000	36312000	0	3	3	3	22.9	22.9	22.9	17.465	0	28.412	181100000	12	21787000	21318000	31457000	53104000	52887000	550350	30184000	3631100	3553000	5242900	8850700	8814400	91725	2	1	4	2	2	1	By MS/MS	By MS/MS	By MS/MS	By MS/MS	By MS/MS	By MS/MS
Q2R0I1	Q2R0I1	Dirigent protein	LOC_Os11g42500	25427000	22805000	0	55801000	63912000	0	3	3	3	33.1	33.1	33.1	16.603	0	24.138	219420000	17	27133000	24702000	24503000	50038000	78673000	14371000	54855000	6783100	6175500	6125900	12510000	19668000	3592700	3	2	2	3	5	2	By MS/MS	By MS/MS	By MS/MS	By MS/MS	By MS/MS	By MS/MS
Q2R0X0	Q2R0X0	Os11g0629200 protein	LOC_Os11g41130	9172800	7845900	6063200	0	0	0	2	2	2	12.5	12.5	12.5	35.33	0	14.183	22003000	5	8397300	7201800	6404200	0	0	0	1100200	419870	360090	320210	0	0	0	3	1	1	0	0	0	By MS/MS	By MS/MS	By MS/MS
Q2R1J1	Q2R1J1	ABC transporter family protein, expressed	LOC_Os11g39020	0	0	3387100	0	0	0	2	2	2	5.4	5.4	5.4	77.65	0.00088261	10.667	16364000	1	6418500	4346200	3605700	0	0	1993900	511380	200580	135820	112680	0	0	62309	1	0	0	0	0	0	By MS/MS	By matching	By matching			By matching
Q2R1J8;A0A0P0Y445;Q0DRI8	Q2R1J8;A0A0P0Y445	40S ribosomal protein S9, putative, expressed;Os11g0602500 protein (Fragment)	LOC_Os03g05980;Os11g0602500	93383000	85944000	113090000	94399000	109330000	99881000	10	10	10	50.8	50.8	50.8	22.673	0	81.101	588080000	57	85875000	67028000	105960000	109450000	179850000	39916000	53462000	7806800	6093500	9632800	9949800	16350000	3628700	10	8	12	6	19	2	By MS/MS	By MS/MS	By MS/MS	By MS/MS	By MS/MS	By MS/MS
Q2R1K5;A0A0P0Y4B3	Q2R1K5;A0A0P0Y4B3	Os11g0602200 protein;Os11g0602200 protein (Fragment)	LOC_Os11g38900;Os11g0602200	69976000	73914000	79631000	81955000	57072000	74879000	12	12	11	22.8	22.8	21.6	89.214	0	87.551	397760000	26	87309000	80192000	86768000	72455000	46160000	24878000	13259000	2910300	2673100	2892300	2415200	1538700	829270	5	5	8	3	4	1	By MS/MS	By MS/MS	By MS/MS	By MS/MS	By MS/MS	By MS/MS
Q2R1N0	Q2R1N0	Glycosyltransferase	LOC_Os11g38650	7633600	9783300	8267800	0	0	0	4	4	4	11.8	11.8	11.8	52.534	0	27.545	48665000	7	7633600	8129800	8798900	8087900	13513000	2501700	2212000	346980	369530	399950	367630	614240	113720	2	2	2	0	1	0	By MS/MS	By MS/MS	By MS/MS	By matching	By MS/MS	By MS/MS
Q2R1S1;C7J327	Q2R1S1	Harpin binding protein 1, putative, expressed	LOC_Os11g38260	20514000	28384000	27041000	34745000	31874000	28051000	5	5	5	22.6	22.6	22.6	28.374	0	34.556	164290000	13	13911000	24246000	23372000	31566000	60596000	10600000	13691000	1159200	2020500	1947700	2630500	5049700	883350	2	2	2	3	4	0	By MS/MS	By MS/MS	By MS/MS	By MS/MS	By MS/MS	By MS/MS
Q2R1V8	Q2R1V8	GDP-mannose 3,5-epimerase 2	GME-2	0	0	0	0	0	5345100	6	2	2	21.3	7.3	7.3	42.132	0.00089847	11.069	36141000	1	10501000	8825800	7010300	3121500	4586500	2095800	1571400	456580	383730	304800	135720	199410	91120	0	1	0	0	0	0	By matching	By MS/MS	By MS/MS	By matching	By matching	By matching
Q2R2W2	Q2R2W2	14-3-3-like protein GF14-D	GF14D	19001000	18443000	19192000	23581000	18213000	19648000	8	4	4	38.1	21.9	21.9	29.261	0	31.019	107790000	16	20798000	17266000	23490000	19038000	19178000	8019900	7186000	1386500	1151100	1566000	1269200	1278500	534660	3	3	5	2	3	0	By MS/MS	By MS/MS	By MS/MS	By MS/MS	By MS/MS	By matching
Q2R3A1	Q2R3A1	Chalcone synthase 1	CHS1	11683000	13128000	11010000	0	0	0	3	3	3	11.3	11.3	11.3	43.264	0	20.383	44999000	4	10888000	11792000	11432000	4927500	5959700	0	3461500	837540	907060	879390	379040	458440	0	0	1	3	0	0	0	By matching	By MS/MS	By MS/MS	By matching	By matching
Q2R3H6	Q2R3H6	Acyl carrier protein	LOC_Os11g31900	0	0	14179000	0	0	0	2	2	2	15.5	15.5	15.5	15.403	0	11.771	49962000	2	13047000	9339300	15094000	4848800	5813600	1818800	12490000	3261800	2334800	3773500	1212200	1453400	454690	0	0	1	0	1	0	By matching	By MS/MS	By MS/MS	By matching	By MS/MS	By matching
Q2R3X8	Q2R3X8	Os11g0497000 protein	LOC_Os11g30410	0	0	0	0	1029100	0	1	1	1	3.4	3.4	3.4	35.931	0.0022779	6.7108	11216000	3	2461900	2290300	3790600	1338000	1335700	0	623140	136770	127240	210590	74333	74203	0	1	1	1	0	0	0	By MS/MS	By MS/MS	By MS/MS	By matching	By matching
Q2R480;A0A0P0Y2C4	Q2R480;A0A0P0Y2C4	6-phosphogluconate dehydrogenase, decarboxylating 2, chloroplastic;Os11g0484500 protein (Fragment)	G6PGH2;Os11g0484500	15620000	18045000	16004000	16352000	18442000	13879000	5	5	5	12.8	12.8	12.8	54.299	0	35.005	90428000	11	18163000	17095000	14452000	12756000	21433000	6527500	3931600	789710	743280	628340	554620	931890	283810	2	2	2	1	3	1	By MS/MS	By MS/MS	By MS/MS	By MS/MS	By MS/MS	By MS/MS
Q2R483	Q2R483	Probable bifunctional methylthioribulose-1-phosphate dehydratase/enolase-phosphatase E1	Os11g0484000	30249000	34257000	30891000	19461000	17402000	26539000	5	5	5	13.7	13.7	13.7	56.959	0	33.998	147920000	20	32933000	29779000	38605000	16571000	22222000	7812000	5100800	1135600	1026800	1331200	571410	766280	269380	5	6	7	1	0	1	By MS/MS	By MS/MS	By MS/MS	By MS/MS	By matching	By MS/MS
Q2R4A1	Q2R4A1	40S ribosomal protein S5, putative, expressed	LOC_Os11g29190	34094000	0	41006000	86270000	75651000	67799000	4	4	2	28.1	28.1	17.1	22.206	0	37.745	315950000	16	25334000	13553000	32008000	86703000	135890000	22459000	28723000	2303100	1232100	2909800	7882100	12354000	2041700	3	2	2	2	5	2	By MS/MS	By MS/MS	By MS/MS	By MS/MS	By MS/MS	By MS/MS
Q2R4Z4	Q2R4Z4	Water stress-inducible protein Rab21	RAB21	0	0	0	0	0	981410	1	1	1	7.6	7.6	7.6	17.326	0.0057061	6.0969	9431100	1	3087200	1036300	2801500	637770	1483500	384800	3143700	1029100	345440	933840	212590	494490	128270	0	0	1	0	0	0	By matching	By matching	By MS/MS	By matching	By matching	By matching
Q2R678	Q2R678	Expressed protein	LOC_Os11g21990	0	0	5474900	0	0	0	2	2	2	5.8	5.8	5.8	47.309	0	13.316	15738000	1	0	3081400	5828400	0	6828000	0	582880	0	114130	215870	0	252890	0	0	0	0	1	0	0		By matching	By MS/MS	By MS/MS	By MS/MS
Q2R8Z5;A0A0P0Y0G4;Q0ITW7;A0A0P0Y0E7	Q2R8Z5	Alcohol dehydrogenase 1	ADH1	66112000	73376000	57975000	77031000	89159000	63978000	8	8	8	28.5	28.5	28.5	40.984	0	61.992	438590000	35	78955000	61171000	79547000	58186000	141750000	18972000	25799000	4644400	3598300	4679200	3422700	8338500	1116000	6	7	7	4	8	3	By MS/MS	By MS/MS	By MS/MS	By MS/MS	By MS/MS	By MS/MS
Q2RAK2	Q2RAK2	Pyruvate kinase 1, cytosolic	Os11g0148500	271400000	306390000	305800000	250350000	304900000	401060000	15	15	3	40.6	40.6	10.8	57.319	0	207.1	1703300000	119	309200000	324330000	343230000	275780000	307910000	142840000	60832000	11043000	11583000	12258000	9849400	10997000	5101400	22	27	29	10	23	8	By MS/MS	By MS/MS	By MS/MS	By MS/MS	By MS/MS	By MS/MS
Q2RAK8;Q2QXS4	Q2RAK8;Q2QXS4	Os11g0147800 protein;Os12g0145100 protein	LOC_Os11g05050;LOC_Os12g05050	30971000	25594000	22753000	23351000	0	21665000	2	2	2	11.4	11.4	11.4	25.128	0	13.984	123810000	12	26716000	22407000	21075000	25250000	18227000	10140000	10318000	2226300	1867200	1756300	2104200	1518900	844970	3	2	2	2	2	1	By MS/MS	By MS/MS	By MS/MS	By MS/MS	By MS/MS	By MS/MS
Q2RB23;Q2QYB7	Q2RB23;Q2QYB7	Homoserine dehydrogenase;Homoserine dehydrogenase	LOC_Os11g03470;LOC_Os12g03190	25774000	24068000	21621000	20139000	58118000	20988000	5	5	5	16.4	16.4	16.4	40.687	0	30.833	173220000	14	34895000	17001000	24757000	16632000	72222000	7713900	10189000	2052600	1000100	1456300	978340	4248400	453760	5	1	3	1	3	1	By MS/MS	By MS/MS	By MS/MS	By MS/MS	By MS/MS	By MS/MS
Q2RBF6	Q2RBF6	Dual specificity phosphatase, catalytic domain containing protein, expressed	LOC_Os11g02180	0	0	0	0	0	47050000	1	1	1	7	7	7	30.288	0.0015674	7.0252	30122000	1	6161900	5512700	0	0	0	18448000	2008200	410790	367510	0	0	0	1229900	0	1	0	0	0	0	By matching	By MS/MS				By matching
Q2RBM4;A0A0P0XY47;A0A0P0XXZ7;A0A0N7KH34	Q2RBM4	Os11g0106400 protein	LOC_Os11g01510	1087100000	1172900000	966360000	877820000	894310000	1029700000	32	32	17	42.9	42.9	23	117.12	0	323.31	5709800000	348	1024900000	933860000	1037200000	890430000	1449700000	373760000	101960000	18301000	16676000	18521000	15901000	25888000	6674200	72	76	74	43	50	33	By MS/MS	By MS/MS	By MS/MS	By MS/MS	By MS/MS	By MS/MS
Q306J3	Q306J3	Dirigent protein	JAC1	26667000	17573000	15004000	0	39374000	0	3	3	3	21.9	21.9	21.9	33.012	0	24.269	114550000	6	25513000	18743000	21030000	8508500	39958000	799430	8811800	1962600	1441800	1617700	654500	3073700	61495	2	1	0	1	2	0	By MS/MS	By MS/MS	By matching	By MS/MS	By MS/MS	By matching
Q336R9	Q336R9	Peptide methionine sulfoxide reductase A4, chloroplastic	MSRA4	22340000	22562000	27460000	15353000	0	15208000	3	3	3	12.5	12.5	12.5	28.639	0	19.707	104920000	11	28443000	21603000	30908000	11982000	9099400	2885900	6557500	1777700	1350200	1931700	748890	568710	180370	3	4	4	0	0	0	By MS/MS	By MS/MS	By MS/MS	By matching	By matching	By matching
Q336T9	Q336T9	Flavin-containing monooxygenase	LOC_Os10g40570	26238000	19655000	17216000	0	24558000	19356000	5	5	5	15.6	15.6	15.6	53.726	0	35.71	106130000	14	25198000	20440000	22763000	4335700	27709000	5680400	4614200	1095600	888710	989690	188510	1204800	246970	6	3	3	0	1	1	By MS/MS	By MS/MS	By MS/MS	By matching	By MS/MS	By MS/MS
Q336X9;Q5J4W4	Q336X9	Mitogen-activated protein kinase 6	MPK6	30124000	29027000	27205000	41671000	31413000	18785000	7	7	7	26.1	26.1	26.1	42.772	0	56.573	180870000	16	17944000	13990000	20430000	36843000	82413000	9251900	9043600	897190	699490	1021500	1842100	4120700	462600	3	2	3	2	5	1	By MS/MS	By MS/MS	By MS/MS	By MS/MS	By MS/MS	By MS/MS
Q337E9;A0A0P0XWJ6;A0A0P0XWH9	Q337E9	Malic enzyme	LOC_Os10g35960	63622000	72163000	88270000	68444000	61325000	60985000	13	13	13	31	31	31	68.279	0	98.757	403460000	37	69612000	57903000	99391000	59597000	99022000	17933000	11527000	1988900	1654400	2839700	1702800	2829200	512380	8	9	10	4	5	1	By MS/MS	By MS/MS	By MS/MS	By MS/MS	By MS/MS	By MS/MS
Q337Y2	Q337Y2	Probable cinnamyl alcohol dehydrogenase 3	CAD3	26314000	24998000	17785000	31169000	0	18956000	3	3	3	17.8	17.8	17.8	38.523	0	39.156	114870000	12	36009000	28857000	27987000	14544000	4526400	2949000	6381800	2000500	1603200	1554900	807980	251470	163830	3	3	4	1	1	0	By MS/MS	By MS/MS	By MS/MS	By MS/MS	By MS/MS	By matching
Q338G3;Q0J1S6	Q338G3;Q0J1S6	ATP-dependent 6-phosphofructokinase;ATP-dependent 6-phosphofructokinase	PFK;PFK	9627200	10044000	9434500	0	0	0	2	2	2	4.2	4.2	4.2	57.365	0	13.214	27950000	4	9669500	8564400	9716100	0	0	0	1118000	386780	342570	388640	0	0	0	2	1	1	0	0	0	By MS/MS	By MS/MS	By MS/MS
Q338I8;A0A0N7KRR3	Q338I8;A0A0N7KRR3	Os10g0400800 protein;Os10g0400800 protein (Fragment)	LOC_Os10g26130;Os10g0400800	29735000	27897000	36083000	0	29005000	16877000	6	6	6	17.8	17.8	17.8	55.893	0	38.801	147850000	13	34706000	26604000	33630000	8636200	38506000	5767100	6720400	1577500	1209300	1528600	392550	1750300	262140	3	3	4	0	3	0	By MS/MS	By MS/MS	By MS/MS	By matching	By MS/MS	By MS/MS
Q338J4	Q338J4	Methionyl-tRNA synthetase, putative, expressed	LOC_Os10g26050	0	0	0	0	0	3920900	1	1	1	2.1	2.1	2.1	68.22	0.0015886	7.1758	10481000	2	2077000	2336800	1807100	0	2722600	1537300	338090	67000	75380	58294	0	87827	49591	0	1	1	0	0	0	By matching	By MS/MS	By MS/MS		By matching	By matching
Q339Q0	Q339Q0	Large secreted protein, putative, expressed	LOC_Os10g19880	0	0	0	0	0	1255600	1	1	1	1.6	1.6	1.6	94.074	0.0015637	6.9853	11985000	1	2937500	4104000	2148000	803290	1499500	492290	352490	86397	120710	63177	23626	44102	14479	0	1	0	0	0	0	By matching	By MS/MS	By matching	By matching	By matching	By matching
Q33B10;A0A0N7KSQ1	Q33B10;A0A0N7KSQ1	Os10g0151800 protein;Os11g0250000 protein	LOC_Os10g06130;Os11g0250000	30674000	26675000	59141000	14340000	14591000	13447000	6	6	6	14.4	14.4	14.4	47.821	0	38.827	146570000	14	36787000	32361000	43580000	12522000	13946000	7378300	5637500	1414900	1244700	1676200	481620	536400	283780	4	3	6	1	0	0	By MS/MS	By MS/MS	By MS/MS	By MS/MS	By matching	By matching
Q33BE1;Q2EIG9	Q33BE1;Q2EIG9	Os10g0115600 protein;Os10g0115600 protein	LOC_Os10g02630;Os10g0115600	0	0	0	0	5523900	0	2	2	2	4.3	4.3	4.3	55.113	0	15.221	49650000	7	14551000	11236000	16694000	0	7169300	0	2920600	855960	660950	981980	0	421730	0	2	1	3	0	1	0	By MS/MS	By MS/MS	By MS/MS		By MS/MS
Q33E21	Q33E21	NAD-dependent isocitrate dehydrogenase c;1	OsIDHc;1	0	0	0	0	0	8758800	2	1	1	8.8	2.7	2.7	40.141	0.002271	6.6806	49506000	5	10409000	8184100	8491200	8794400	10193000	3434200	3536100	743500	584580	606510	628170	728080	245300	1	2	1	0	1	0	By MS/MS	By MS/MS	By MS/MS	By matching	By MS/MS	By matching
Q33E23;Q6H3Y7	Q33E23;Q6H3Y7	Glutamate dehydrogenase 2, mitochondrial;Glutamate dehydrogenase 3, mitochondrial	GDH2;GDH3	0	0	0	0	0	4615800	2	1	1	6.6	4.9	4.9	44.55	0.0057102	6.1118	7984400	2	2990900	1613300	1570300	0	0	1809800	362930	135950	73333	71378	0	0	82264	1	0	1	0	0	0	By MS/MS	By matching	By MS/MS		By matching	By matching
Q40648	Q40648	Probable voltage-gated potassium channel subunit beta	KOB1	15915000	16508000	23210000	0	0	11108000	3	3	3	10.1	10.1	10.1	36.449	0	20.646	67372000	8	11754000	17441000	26010000	0	8418600	3748900	3963100	691410	1025900	1530000	0	495210	220520	2	2	4	0	0	0	By MS/MS	By MS/MS	By MS/MS		By matching	By matching
Q40665;P46265;A0A0P0VF92	Q40665;P46265;A0A0P0VF92	Tubulin beta-3 chain;Tubulin beta-5 chain;Os02g0167300 protein (Fragment)	TUBB3;TUBB5;NA	588160000	524210000	623740000	468940000	500150000	482450000	15	15	2	45.1	45.1	8.3	50.121	0	197.49	3399400000	218	541270000	389890000	601300000	526740000	1089300000	250860000	161870000	25775000	18566000	28634000	25083000	51871000	11946000	37	31	42	38	45	25	By MS/MS	By MS/MS	By MS/MS	By MS/MS	By MS/MS	By MS/MS
Q40677;Q94JJ0	Q40677	Fructose-bisphosphate aldolase, chloroplastic	ALDP	367020000	362240000	516370000	327230000	348970000	323800000	11	11	11	33.5	33.5	33.5	42.005	0	105.64	2138000000	116	379440000	310180000	374340000	333070000	604420000	136530000	97181000	17247000	14099000	17015000	15140000	27474000	6206100	20	20	23	19	21	13	By MS/MS	By MS/MS	By MS/MS	By MS/MS	By MS/MS	By MS/MS
Q40680;A0A0P0X986;Q40682	Q40680	Elongation factor 1-delta 1	Os07g0614500	133100000	140060000	134900000	115740000	83749000	88957000	6	6	6	34.1	34.1	34.1	24.862	0	49.313	701800000	42	137520000	88727000	144400000	167390000	123460000	40297000	70180000	13752000	8872700	14440000	16739000	12346000	4029700	9	7	11	3	7	5	By MS/MS	By MS/MS	By MS/MS	By MS/MS	By MS/MS	By MS/MS
Q40711	Q40711	Dehydrin family protein, expressed	LOC_Os03g45280	0	0	0	0	0	1986200	1	1	1	9.8	9.8	9.8	10.363	0.0029652	6.4226	18370000	6	7097400	3072600	7421000	0	0	778750	4592400	1774300	768150	1855200	0	0	194690	2	1	2	0	0	1	By MS/MS	By MS/MS	By MS/MS			By MS/MS
Q42971;A0A0N7KRH6	Q42971;A0A0N7KRH6	Enolase;Os10g0167300 protein	ENO1;Os10g0167300	597190000	601540000	538400000	532840000	346780000	585120000	19	19	8	64.3	64.3	34.8	47.972	0	323.31	2870300000	171	697610000	558930000	635130000	380220000	376590000	221830000	114810000	27904000	22357000	25405000	15209000	15063000	8873400	45	34	41	21	18	12	By MS/MS	By MS/MS	By MS/MS	By MS/MS	By MS/MS	By MS/MS
Q43008	Q43008	Superoxide dismutase [Mn], mitochondrial	SODA	0	0	0	0	0	3145200	1	1	1	6.5	6.5	6.5	24.997	0.0022831	6.7274	83282000	2	0	0	5278400	43153000	33617000	1233200	6406300	0	0	406030	3319500	2585900	94861	0	0	1	1	0	0			By MS/MS	By MS/MS	By matching	By matching
Q43011	Q43011	Asparagine synthetase [glutamine-hydrolyzing] 2	Os06g0265000	0	0	22434000	0	0	0	3	3	3	6.4	6.4	6.4	66.227	0	21.953	87569000	9	12318000	8836700	23882000	12048000	30484000	0	3368000	473780	339870	918550	463380	1172500	0	2	1	2	2	1	1	By MS/MS	By MS/MS	By MS/MS	By MS/MS	By MS/MS	By MS/MS
Q43594	Q43594	Tubulin beta-1 chain	TUBB1	23720000	17893000	22917000	49589000	68280000	27162000	13	3	1	40.3	12.8	2.5	50.285	0	36.414	212160000	16	20270000	12533000	21356000	54517000	92569000	10917000	10103000	965240	596830	1016900	2596100	4408000	519870	3	3	3	4	3	0	By MS/MS	By MS/MS	By MS/MS	By MS/MS	By MS/MS	By matching
Q53JF7	Q53JF7	Abscisic stress-ripening protein 5	ASR5	274900000	176740000	122160000	124020000	104380000	199530000	4	4	4	57.2	57.2	57.2	15.465	0	99.529	906340000	44	281910000	180090000	155820000	111660000	113580000	63267000	181270000	56383000	36018000	31165000	22332000	22717000	12653000	11	12	10	3	3	5	By MS/MS	By MS/MS	By MS/MS	By MS/MS	By MS/MS	By MS/MS
Q53JI9;A0A0P0Y112	Q53JI9	Probable sucrose-phosphate synthase 5	SPS5	66318000	69837000	70091000	61215000	47309000	77558000	15	12	12	20.4	17.9	17.9	108.98	0	90.734	364520000	45	69840000	65276000	69348000	41397000	93035000	25620000	8100300	1552000	1450600	1541100	919930	2067400	569340	11	10	13	5	3	3	By MS/MS	By MS/MS	By MS/MS	By MS/MS	By MS/MS	By MS/MS
Q53LQ0;A0A0P0XZP3	Q53LQ0;A0A0P0XZP3	Protein disulfide isomerase-like 1-1;Protein disulfide-isomerase (Fragment)	PDIL1-1;Os11g0199200	108100000	148890000	139580000	76458000	96721000	79432000	14	14	13	27.5	27.5	26.2	56.854	0	93.908	627150000	47	148890000	133340000	164600000	58297000	101470000	20548000	19598000	4652800	4166800	5143800	1821800	3171000	642120	9	11	14	5	6	2	By MS/MS	By MS/MS	By MS/MS	By MS/MS	By MS/MS	By MS/MS
Q6K7V0;Q53LT4	Q6K7V0;Q53LT4	Uridine kinase;Uridine kinase	Os02g0273000;LOC_Os11g16370	0	0	0	0	0	5586700	3	2	2	5.7	3.7	3.7	54.854	0.00089366	10.998	20413000	4	4638300	3951300	536800	5391800	3704300	2190500	887520	201660	171800	23339	234430	161060	95238	0	0	1	1	1	1	By matching	By matching	By MS/MS	By MS/MS	By MS/MS	By MS/MS
Q53M52	Q53M52	Tubulin alpha-2 chain	TUBA	996950000	877400000	921030000	1036000000	1055800000	1204400000	13	13	0	42.1	42.1	0	49.736	0	196.99	6667300000	225	995310000	847600000	1079900000	911440000	2445200000	387790000	317490000	47396000	40362000	51424000	43402000	116440000	18466000	48	43	48	31	36	19	By MS/MS	By MS/MS	By MS/MS	By MS/MS	By MS/MS	By MS/MS
Q53N83	Q53N83	Chlorophyll a-b binding protein, chloroplastic	LOC_Os11g13890	25345000	29324000	24498000	23918000	30091000	33181000	3	3	3	21.9	21.9	21.9	30.283	0	23.773	158480000	14	25888000	23187000	29611000	24968000	45088000	9733400	11320000	1849100	1656200	2115100	1783400	3220500	695240	3	3	4	1	2	1	By MS/MS	By MS/MS	By MS/MS	By MS/MS	By MS/MS	By MS/MS
Q53NM9;A0A0P0Y5S2	Q53NM9	DnaK-type molecular chaperone hsp70-rice	LOC_Os11g47760	1749700000	1746700000	1573000000	1450300000	1077000000	1344100000	22	20	6	49.5	46.8	19	71.184	0	290.55	8646900000	387	1646900000	1425100000	1821000000	1430500000	1721500000	601930000	233700000	44510000	38516000	49217000	38663000	46528000	16268000	78	73	78	60	54	44	By MS/MS	By MS/MS	By MS/MS	By MS/MS	By MS/MS	By MS/MS
Q53NW6	Q53NW6	Phenylalanine ammonia-lyase	LOC_Os11g48110	0	0	0	0	0	27133000	17	1	1	26	1.6	1.6	75.508	0.0008547	8.2914	87964000	1	0	0	17405000	16827000	43094000	10639000	2199100	0	0	435120	420660	1077300	265960	0	0	0	0	1	0	By matching	By matching	By MS/MS	By matching	By MS/MS	By matching
Q53P85	Q53P85	Calcium-dependent protein kinase 24	CPK24	14107000	22562000	15927000	0	0	23440000	3	3	2	9.4	9.4	6.4	56.672	0	21.641	66556000	7	17961000	22081000	22425000	0	0	4089900	2662300	718430	883250	896980	0	0	163600	2	2	3	0	0	0	By MS/MS	By MS/MS	By MS/MS			By matching
Q53Q78	Q53Q78	ATP-dependent (S)-NAD(P)H-hydrate dehydratase	LOC_Os11g17610	0	0	0	0	6457400	0	1	1	1	3.5	3.5	3.5	39.912	0.0015385	6.8691	25457000	2	6155400	4960800	5959900	0	8380900	0	1157100	279790	225490	270900	0	380950	0	0	1	0	0	1	0	By matching	By MS/MS	By matching		By MS/MS
Q53QG1	Q53QG1	Os11g0153700 protein	LOC_Os11g05556	0	0	0	0	14437000	0	2	2	2	4.7	4.7	4.7	61.219	0	13.581	31166000	2	5121500	3691800	3615300	0	18737000	0	944420	155200	111870	109550	0	567790	0	1	0	0	0	1	0	By MS/MS	By matching	By matching		By MS/MS
Q53RJ5	Q53RJ5	Heat shock 70 kDa protein BIP2	BIP2	0	0	0	0	0	29730000	2	1	1	2.8	1.6	1.6	73.373	0.00084175	8.0137	166120000	5	40496000	36125000	0	36394000	41448000	11657000	5537400	1349900	1204200	0	1213100	1381600	388550	1	1	0	1	1	1	By MS/MS	By MS/MS	By matching	By MS/MS	By MS/MS	By MS/MS
Q53RM0	Q53RM0	Magnesium-chelatase subunit ChlI, chloroplastic	CHLI	157770000	141420000	140290000	147950000	194670000	138810000	13	13	13	34.7	34.7	34.7	44.865	0	113.12	891930000	66	144370000	116330000	162220000	125750000	286020000	57237000	38780000	6277000	5058000	7053100	5467400	12436000	2488500	17	11	14	6	13	5	By MS/MS	By MS/MS	By MS/MS	By MS/MS	By MS/MS	By MS/MS
Q5JJJ5	Q5JJJ5	Os01g0920400 protein	B1793G04.8-1	3867000	3954200	3903800	0	0	0	2	2	2	2.8	2.8	2.8	90.032	0.00090416	11.168	13308000	3	3866100	3338400	4088500	2014900	0	0	271590	78899	68130	83439	41120	0	0	1	0	2	0	0	0	By MS/MS	By matching	By MS/MS	By matching
Q5JJM6	Q5JJM6	Os01g0367100 protein	P0784G04.3	9530800	7774200	7916400	0	0	0	2	2	2	6.5	6.5	6.5	36.727	0	12.371	26958000	4	9459300	6918000	7914900	1331500	1053700	280220	1497600	525520	384330	439720	73972	58538	15568	2	1	1	0	0	0	By MS/MS	By MS/MS	By MS/MS	By matching	By matching	By matching
Q5JJP7	Q5JJP7	Os01g0924400 protein	Os01g0924400	0	0	0	0	0	2237800	1	1	1	6.6	6.6	6.6	33.174	0.003647	6.2656	9897100	1	2761600	0	4325300	0	1932700	877430	1413900	394520	0	617900	0	276100	125350	0	0	1	0	0	0	By matching		By MS/MS		By matching	By matching
Q5JK10	Q5JK10	Os01g0926300 protein	Os01g0926300	0	0	0	0	5549300	0	2	2	2	6	6	6	46.43	0	11.832	33269000	1	6474400	5236900	9827800	3483900	7202300	1044100	1188200	231230	187030	350990	124420	257230	37288	0	0	0	0	1	0	By matching	By matching	By MS/MS	By matching	By MS/MS	By matching
Q5JK18;Q0DLR8	Q5JK18	Os01g0927900 protein	Os01g0927900	61373000	47889000	54582000	55562000	60838000	50080000	10	10	10	22.6	22.6	22.6	61.181	0	76.384	322240000	31	64091000	44843000	50605000	64422000	84778000	13501000	9764800	1942200	1358900	1533500	1952200	2569000	409110	10	7	7	2	4	1	By MS/MS	By MS/MS	By MS/MS	By MS/MS	By MS/MS	By MS/MS
Q5JK43	Q5JK43	Os01g0928100 protein	Os01g0928100	12481000	16547000	15220000	0	13000000	14689000	4	4	4	10.7	10.7	10.7	62.179	0	23.684	69863000	5	13070000	14667000	17601000	6256000	12312000	5956400	2117100	396070	444470	533360	189580	373090	180500	1	1	3	0	0	0	By MS/MS	By MS/MS	By MS/MS	By matching	By MS/MS	By matching
Q5JK67	Q5JK67	Os01g0958100 protein	OJ1294_F06.26-1	0	0	0	0	12438000	0	1	1	1	4.7	4.7	4.7	39.254	0.00084034	7.9986	27139000	1	2796100	2820500	5379000	0	16143000	0	1428400	147160	148450	283100	0	849650	0	0	0	0	0	1	0	By matching	By matching	By matching		By MS/MS
Q5JK78	Q5JK78	Ubiquitin carboxyl-terminal hydrolase	Os01g0550100	34903000	34605000	40919000	19693000	38834000	31215000	7	7	7	21.7	21.7	21.7	53.165	0	50.309	191460000	14	30819000	27939000	39727000	19922000	60672000	12376000	8702500	1400900	1270000	1805800	905560	2757800	562530	4	1	3	0	4	2	By MS/MS	By MS/MS	By MS/MS	By matching	By MS/MS	By MS/MS
Q5JKQ4	Q5JKQ4	Os01g0559000 protein	B1064G04.15-1	7100100	7636900	7518400	0	0	7724700	2	2	2	16.2	16.2	16.2	22.655	0	14.998	27880000	5	5715000	7154600	10116000	1178800	1304200	2411700	3097800	635000	794960	1123900	130980	144910	267970	2	1	2	0	0	0	By MS/MS	By MS/MS	By MS/MS	By matching	By matching	By matching
Q5JKU5	Q5JKU5	Os01g0742200 protein	Os01g0742200	0	0	78908000	0	0	0	14	1	1	15.6	2.2	2.2	91.999	0.00081967	7.6396	84002000	1	0	0	84002000	0	0	0	1909100	0	0	1909100	0	0	0	0	0	1	0	0	0	By matching	By matching	By MS/MS	By matching	By matching	By matching
Q5JKZ9;A0A0P0VD92	Q5JKZ9;A0A0P0VD92	Os01g0952600 protein;Os01g0952600 protein (Fragment)	Os01g0952600;Os01g0952600	0	0	0	0	2358900	0	2	2	2	1.7	1.7	1.7	126.24	0.00091158	11.394	14345000	2	3513300	2348000	3954200	1467900	3061600	0	235160	57594	38492	64824	24064	50190	0	0	0	1	1	0	0	By matching	By matching	By MS/MS	By MS/MS	By matching
Q5JLP6;B7F3S0	Q5JLP6	S-formylglutathione hydrolase	B1150F11.18-1	58330000	56194000	63028000	54568000	52364000	47904000	5	5	5	21.6	21.6	21.6	32.181	0	37.834	309100000	27	61991000	47785000	70339000	48123000	60648000	20211000	22078000	4427900	3413200	5024200	3437400	4332000	1443600	5	5	5	4	5	3	By MS/MS	By MS/MS	By MS/MS	By MS/MS	By MS/MS	By MS/MS
Q5JMM6;A0A0P0V8D7	Q5JMM6;A0A0P0V8D7	Os01g0753100 protein;Os01g0753100 protein (Fragment)	Os01g0753100;Os01g0753100	4869400	4559800	2827500	0	0	0	2	2	2	6.6	6.6	6.6	38.814	0	12.148	11725000	3	4905500	3574000	3246000	0	0	0	651420	272530	198550	180330	0	0	0	1	1	1	0	0	0	By MS/MS	By MS/MS	By MS/MS
Q5JMT9	Q5JMT9	Copine I-like	Os01g0960500	0	0	0	0	0	2198800	1	1	1	6.2	6.2	6.2	42.614	0.001542	6.874	14514000	3	3644700	4642200	5365000	0	0	862110	967610	242980	309480	357670	0	0	57474	1	1	1	0	0	0	By MS/MS	By MS/MS	By MS/MS			By matching
Q5JNB0	Q5JNB0	Cysteine synthase	Os01g0978100	109390000	115810000	112760000	265060000	205400000	214610000	12	12	11	49.2	49.2	46.2	41.788	0	136.62	950390000	63	143770000	133350000	159160000	167930000	247780000	98398000	45256000	6846200	6350100	7578900	7996600	11799000	4685600	13	14	12	9	10	5	By MS/MS	By MS/MS	By MS/MS	By MS/MS	By MS/MS	By MS/MS
Q5N6Y3	Q5N6Y3	Os01g0901900 protein	Os01g0901900	0	0	0	0	1203100	0	1	1	1	1.9	1.9	1.9	55.001	0.0050578	6.1837	8345600	1	1657600	937220	2922600	1266600	1561500	0	333820	66305	37489	116910	50663	62461	0	0	0	1	0	0	0	By matching	By matching	By MS/MS	By matching	By matching
Q5N725;Q5N726	Q5N725;Q5N726	Fructose-bisphosphate aldolase 3, cytoplasmic;Os01g0905800 protein	FBA3;B1417F08.1-2	380880000	346490000	384420000	282220000	242090000	207920000	15	15	5	46.9	46.9	27.7	38.823	0	143.86	1722100000	119	376540000	282530000	396400000	252150000	312590000	101910000	82005000	17931000	13454000	18876000	12007000	14885000	4852800	28	27	26	14	19	5	By MS/MS	By MS/MS	By MS/MS	By MS/MS	By MS/MS	By MS/MS
Q5N7A1	Q5N7A1	Os01g0851000 protein	Os01g0851000	0	0	0	0	0	5843000	1	1	1	2.8	2.8	2.8	59.778	0.00083893	7.9698	29207000	1	0	3665000	5227800	8728900	9294400	2291000	942160	0	118220	168640	281580	299820	73902	0	0	0	1	0	0		By matching	By matching	By MS/MS	By MS/MS	By matching
Q5N842	Q5N842	Signal recognition particle subunit SRP72	Os01g0889000	33793000	32976000	30230000	18718000	28515000	19974000	8	8	8	17.5	17.5	17.5	73.573	0	58.599	158740000	20	36374000	30510000	37810000	10643000	36986000	6414900	5473700	1254300	1052100	1303800	366990	1275400	221210	6	5	5	1	3	0	By MS/MS	By MS/MS	By MS/MS	By MS/MS	By MS/MS	By matching
Q5N8I8	Q5N8I8	Os01g0700000 protein	Os01g0700000	0	0	0	0	0	3245600	1	1	1	5	5	5	27.422	0.0022506	6.5285	20001000	1	3484000	4128400	3995700	3739200	3381200	1272600	1666800	290340	344030	332980	311600	281770	106050	0	0	1	0	0	0	By matching	By matching	By MS/MS	By matching	By matching	By matching
Q5N8U8	Q5N8U8	Os01g0900800 protein	P0035F12.17-1	0	0	0	1559500	0	0	1	1	1	3.9	3.9	3.9	40.697	0.0015798	7.1108	9469500	3	3073800	2319100	2530100	1546500	0	0	557030	180810	136420	148830	90969	0	0	1	0	1	0	1	0	By MS/MS	By matching	By MS/MS	By matching	By MS/MS
Q5N9C8	Q5N9C8	Trafficking protein particle complex subunit	Os01g0708600	0	0	0	0	0	3185300	1	1	1	5.7	5.7	5.7	21.74	0.0029762	6.4598	21818000	2	4350200	4977700	5078400	3371700	2790700	1248900	2424200	483360	553080	564260	374640	310080	138770	0	1	0	1	0	0	By MS/MS	By MS/MS	By MS/MS	By MS/MS	By matching	By matching
Q5NAI9	Q5NAI9	Os01g0710000 protein	Os01g0710000	143640000	121000000	135740000	73112000	79129000	84973000	7	7	7	27.6	27.6	27.6	50.11	0	71.781	602560000	31	153260000	129560000	123440000	52627000	102200000	41478000	30128000	7662800	6477900	6172100	2631300	5109800	2073900	9	7	9	2	2	2	By MS/MS	By MS/MS	By MS/MS	By MS/MS	By MS/MS	By MS/MS
Q5NAM1	Q5NAM1	Os01g0237100 protein	Os01g0237100	0	0	0	0	0	2637900	1	1	1	5.3	5.3	5.3	33.308	0.00082988	7.8274	16793000	2	3727000	2954100	4580900	2243000	2254000	1034300	987840	219230	173770	269460	131940	132590	60840	1	0	1	0	0	0	By MS/MS	By matching	By MS/MS	By matching	By matching	By matching
Q5NAM3	Q5NAM3	Branched-chain amino acid aminotransferase-like	Os01g0238500	357510000	363680000	312920000	220790000	655270000	323810000	7	7	7	41.3	41.3	41.3	35.757	0	91.145	2388400000	52	317680000	244550000	361250000	126810000	1201600000	136460000	183720000	24437000	18811000	27789000	9754900	92432000	10497000	9	11	12	2	12	6	By MS/MS	By MS/MS	By MS/MS	By MS/MS	By MS/MS	By MS/MS
Q5NBD6	Q5NBD6	5-nucleotidase, cytosolic II-like	Os01g0250900	108730000	118150000	134660000	83185000	105980000	123750000	18	18	18	39.2	39.2	39.2	65.763	0	123.71	660690000	68	115810000	107500000	141590000	71300000	184560000	39935000	20021000	3509300	3257600	4290700	2160600	5592700	1210100	16	16	15	5	14	2	By MS/MS	By MS/MS	By MS/MS	By MS/MS	By MS/MS	By MS/MS
Q5NBQ0;A0A0P0V0X7;A0A0P0V155;Q0DS91	Q5NBQ0;A0A0P0V0X7;A0A0P0V155;Q0DS91	Pyruvate kinase;Pyruvate kinase (Fragment);Pyruvate kinase (Fragment)	Os01g0276700;Os01g0276700;NA	13484000	0	12473000	0	0	0	4	3	3	12.4	9.6	9.6	54.904	0	18.276	67653000	4	12887000	10679000	13913000	5527700	20337000	4308800	2602000	495650	410740	535130	212610	782170	165720	1	0	1	1	1	0	By MS/MS	By matching	By MS/MS	By MS/MS	By MS/MS	By matching
Q5NBT9	Q5NBT9	Protein TPR1	TPR1	9974500	11088000	10758000	0	0	0	5	3	3	4.4	2.7	2.7	125.09	0	16.268	33942000	4	10786000	8097000	12018000	2035400	0	1006100	628550	199730	149940	222550	37693	0	18631	1	1	2	0	0	0	By MS/MS	By MS/MS	By MS/MS	By matching	By matching	By matching
Q5QLG3	Q5QLG3	Os01g0682500 protein	Os01g0682500	105250000	102640000	101030000	98775000	106620000	94952000	11	11	11	39	39	39	46.163	0	83.447	579310000	34	101360000	94447000	90033000	94075000	165040000	34356000	25187000	4406800	4106400	3914500	4090200	7175800	1493800	6	7	8	5	6	2	By MS/MS	By MS/MS	By MS/MS	By MS/MS	By MS/MS	By MS/MS
Q5QM39	Q5QM39	Os01g0528800 protein	Os01g0528800	17886000	21054000	16709000	15321000	0	0	3	3	3	10.4	10.4	10.4	36.892	0	18.852	73271000	4	19726000	21352000	18033000	8529800	5630400	0	4310100	1160300	1256000	1060800	501750	331200	0	1	2	1	0	0	0	By MS/MS	By MS/MS	By MS/MS	By matching	By matching
Q5QMN3	Q5QMN3	DEAD-box ATP-dependent RNA helicase 20	Os01g0197200	19584000	22841000	21200000	16644000	16848000	20111000	6	6	6	16	16	16	54.673	0	43.229	107500000	16	32117000	30655000	21081000	10722000	8638400	4289600	3467800	1036000	988880	680030	345880	278660	138370	4	5	4	1	1	1	By MS/MS	By MS/MS	By MS/MS	By MS/MS	By MS/MS	By MS/MS
Q5QNA5	Q5QNA5	Os01g0208700 protein	Os01g0208700	48519000	46533000	51226000	43188000	55685000	33392000	15	11	11	20.8	17.6	17.6	114.2	0	80.95	266750000	21	44656000	42588000	57865000	26176000	79553000	15910000	4372900	732060	698160	948610	429110	1304100	260810	5	2	9	1	4	0	By MS/MS	By MS/MS	By MS/MS	By MS/MS	By MS/MS	By matching
Q5SMV5	Q5SMV5	Carboxypeptidase	Os06g0186400	31857000	34874000	37686000	49304000	43664000	45431000	6	6	6	16.9	16.9	16.9	53.393	0	41.719	217980000	18	47553000	41358000	57603000	22343000	31710000	17411000	11473000	2502800	2176800	3031800	1175900	1669000	916370	4	3	5	1	1	4	By MS/MS	By MS/MS	By MS/MS	By MS/MS	By MS/MS	By MS/MS
Q5SMX7	Q5SMX7	Translation machinery-associated protein 22	Os01g0195500	0	0	2132400	0	0	0	1	1	1	11.1	11.1	11.1	21.29	0.0036792	6.3184	6943300	1	2413400	2259800	2270100	0	0	0	1157200	402240	376640	378340	0	0	0	1	0	0	0	0	0	By MS/MS	By matching	By matching
Q5SNH5;Q0DK50;Q0DEH8;Q69QS5;A0A0P0WBF4	Q5SNH5	ATP-dependent 6-phosphofructokinase	PFK	32603000	30649000	30233000	29133000	22066000	0	5	5	1	12.4	12.4	3.8	57.84	0	37.358	157190000	20	40514000	32209000	50769000	16242000	15181000	2274600	5821800	1500500	1192900	1880300	601540	562270	84243	5	6	6	2	1	0	By MS/MS	By MS/MS	By MS/MS	By MS/MS	By MS/MS	By matching
Q5SNH7	Q5SNH7	Os01g0191100 protein	Os01g0191100	17925000	19587000	0	0	0	0	2	2	2	37.7	37.7	37.7	11.607	0	14.375	69073000	11	17819000	16360000	11356000	9709200	9486800	4341700	23024000	5939500	5453400	3785300	3236400	3162300	1447200	3	4	2	1	1	0	By MS/MS	By MS/MS	By MS/MS	By MS/MS	By MS/MS	By matching
Q5TKD8	Q5TKD8	Thioredoxin-like 2, chloroplastic	Os05g0200100	0	14399000	0	0	0	0	1	1	1	5.6	5.6	5.6	23.799	0.0016367	7.6071	24975000	2	13012000	11962000	0	0	0	0	1921100	1000900	920190	0	0	0	0	1	1	0	0	0	0	By MS/MS	By MS/MS
Q5TKF4	Q5TKF4	Nucleoside diphosphate kinase	Os05g0595400	222710000	146310000	165070000	40836000	89723000	96069000	7	7	7	30.5	30.5	30.5	25.937	0	50.753	720710000	48	207510000	120690000	190120000	32053000	121950000	48393000	60059000	17292000	10058000	15843000	2671100	10162000	4032700	16	6	13	2	7	4	By MS/MS	By MS/MS	By MS/MS	By MS/MS	By MS/MS	By MS/MS
Q5TKJ2	Q5TKJ2	Os05g0429400 protein	Os05g0429400	6691200	9324400	9534900	6864000	5542500	5514200	4	4	4	12.1	12.1	12.1	63.947	0	23.89	41641000	7	5540500	14517000	6783300	4806500	9129300	863750	1224700	162960	426980	199510	141370	268510	25404	2	1	3	0	1	0	By MS/MS	By MS/MS	By MS/MS	By matching	By MS/MS	By matching
Q5TKP2	Q5TKP2	Os05g0541900 protein	Os05g0541900	31167000	32257000	25491000	41045000	24969000	26061000	4	4	2	33.8	33.8	17.3	14.884	0	23.68	170220000	17	32773000	25711000	32135000	39193000	31184000	9226300	21278000	4096600	3213900	4016900	4899100	3897900	1153300	4	3	3	3	3	1	By MS/MS	By MS/MS	By MS/MS	By MS/MS	By MS/MS	By MS/MS
Q5TKP8	Q5TKP8	Probable cytokinin riboside 5-monophosphate phosphoribohydrolase LOGL7	LOGL7	0	0	0	0	0	11750000	1	1	1	6.7	6.7	6.7	23.838	0.00086059	8.4639	45224000	5	7040400	7151700	7293700	0	19131000	4607100	3478700	541570	550130	561050	0	1471600	354390	1	1	1	0	1	1	By MS/MS	By MS/MS	By MS/MS		By MS/MS	By MS/MS
Q5VME5	Q5VME5	Glycosyltransferase	Os06g0289900	239100000	265090000	245270000	242520000	196330000	239270000	10	10	10	27.7	27.7	27.7	51.482	0	108.11	1343900000	71	208620000	191630000	230730000	243310000	373570000	96074000	63997000	9934300	9125000	10987000	11586000	17789000	4574900	13	13	13	8	12	12	By MS/MS	By MS/MS	By MS/MS	By MS/MS	By MS/MS	By MS/MS
Q5VMI0	Q5VMI0	UDP-glucose:2-hydroxyflavanone C-glucosyltransferase	CGT	0	0	0	0	8214700	0	3	3	3	10.8	10.8	10.8	49.457	0	21.664	18920000	3	2353800	0	4016900	0	10662000	1887200	900930	112090	0	191280	0	507700	89869	1	0	2	0	0	0	By MS/MS		By MS/MS		By matching	By matching
Q5VN31	Q5VN31	Os06g0367100 protein	Os06g0367100	0	0	2911400	0	0	0	1	1	1	1.8	1.8	1.8	103.84	0.0015326	6.8043	9748100	2	3468300	3180400	3099400	0	0	0	256530	91271	83694	81563	0	0	0	1	0	1	0	0	0	By MS/MS	By matching	By MS/MS
Q5VNT9;A0A0P0WS07	Q5VNT9;A0A0P0WS07	Os06g0136600 protein;Os06g0136600 protein (Fragment)	Os06g0136600;Os06g0136600	19156000	23567000	24961000	0	0	0	9	3	3	24.4	11	11	47.938	0	23.222	80203000	9	21880000	12145000	33199000	6289100	6691300	0	3341800	911660	506020	1383300	262050	278800	0	3	2	3	1	0	0	By MS/MS	By MS/MS	By MS/MS	By MS/MS	By matching	By matching
Q5VPC8;A0A0P0V5Y9;A0A0P0V627;A0A0P0V663	Q5VPC8;A0A0P0V5Y9	Os01g0653800 protein;Os01g0653800 protein (Fragment)	Os01g0653800;Os01g0653800	25129000	22247000	25378000	0	13850000	24683000	8	8	8	10.2	10.2	10.2	147.06	0	67.063	107880000	14	19186000	38185000	32900000	4792600	8799900	4018200	1712400	304530	606110	522220	76073	139680	63780	4	3	6	0	1	0	By MS/MS	By MS/MS	By MS/MS	By matching	By MS/MS	By matching
Q5VQ13	Q5VQ13	ATP-dependent Clp protease proteolytic subunit	Os06g0136800	15631000	12558000	21514000	18023000	0	16252000	5	5	5	19.5	19.5	19.5	32.224	0	34.094	84922000	8	17931000	16734000	14993000	17253000	12358000	5654300	5307600	1120700	1045900	937040	1078300	772370	353390	3	2	3	0	0	0	By MS/MS	By MS/MS	By MS/MS	By MS/MS	By matching	By matching
Q5VQ78;A0A0P0WSW0;A0A0P0WSG1	Q5VQ78;A0A0P0WSW0	Coatomer subunit beta-1;Os06g0143900 protein (Fragment)	Os06g0143900;Os06g0143900	29824000	34827000	32462000	58570000	46569000	39215000	11	11	8	15.9	15.9	12.9	102.89	0	79.499	220050000	24	55953000	32866000	44106000	49397000	23320000	14405000	4584300	1165700	684710	918870	1029100	485840	300100	4	3	7	6	3	1	By MS/MS	By MS/MS	By MS/MS	By MS/MS	By MS/MS	By MS/MS
Q5VQG4	Q5VQG4	Galactinol--sucrose galactosyltransferase	RFS	0	0	336450	0	0	0	1	1	1	1.8	1.8	1.8	85.532	0.0016287	7.5269	1884600	2	675680	850750	358170	0	0	0	48323	17325	21814	9183.8	0	0	0	1	1	0	0	0	0	By MS/MS	By MS/MS	By matching
Q6F331;Q5VQR3	Q6F331;Q5VQR3	Os05g0490100 protein;Os01g0812800 protein	Os05g0490100;Os01g0812800	0	0	0	0	0	5455700	1	1	1	9.8	9.8	9.8	12.36	0.0015468	6.8983	20252000	1	4334200	0	0	7030500	6747900	2139100	4050300	866840	0	0	1406100	1349600	427820	0	0	0	0	1	0	By matching			By matching	By MS/MS	By matching
Q5VQX1	Q5VQX1	Os01g0805300 protein	Os01g0805300	0	0	0	0	0	3529500	1	1	1	3.7	3.7	3.7	28.804	0.0029608	6.4186	17668000	3	2183500	2155400	2118500	4671200	5155900	1383900	1039300	128440	126790	124620	274770	303290	81405	0	0	0	1	1	1	By matching	By matching	By matching	By MS/MS	By MS/MS	By MS/MS
Q5VRH2;A0A0P0WS12	Q5VRH2;A0A0P0WS12	Os06g0103600 protein;Os06g0103600 protein (Fragment)	Os06g0103600;Os06g0103600	4893700	6068600	4005700	0	0	0	2	2	2	2.8	2.8	2.8	119.16	0	13.597	15866000	3	4197800	5478600	4445200	0	0	1744100	299350	79203	103370	83872	0	0	32908	1	1	1	0	0	0	By MS/MS	By MS/MS	By MS/MS			By matching
Q5VRH4	Q5VRH4	Homogentisate 1,2-dioxygenase	HGO	11108000	8369200	10683000	0	0	0	2	2	2	6.2	6.2	6.2	51.77	0	14.717	36680000	6	11082000	6997400	11343000	3477300	2940700	839840	1358500	410440	259160	420130	128790	108910	31105	2	2	2	0	0	0	By MS/MS	By MS/MS	By MS/MS	By matching	By matching	By matching
Q5VRV7	Q5VRV7	Ubiquitin carboxyl-terminal hydrolase	Os01g0177200	25143000	27298000	37964000	31817000	27383000	46151000	8	8	8	15	15	15	88.664	0	52.914	180640000	21	26345000	23741000	47065000	30767000	34454000	18265000	5161000	752710	678310	1344700	879050	984390	521870	3	3	6	3	4	2	By MS/MS	By MS/MS	By MS/MS	By MS/MS	By MS/MS	By MS/MS
Q5VRX8;Q65WY6;A0A0P0UZU0;A0A0P0WIS0	Q5VRX8	Os01g0185200 protein	P0510F03.13-1	26721000	39818000	37085000	25906000	21657000	28318000	9	9	9	13.4	13.4	13.4	89.902	0	58.301	170570000	27	35743000	33230000	43377000	16288000	33902000	8026500	3708000	777010	722380	942990	354090	736990	174490	6	5	9	3	4	0	By MS/MS	By MS/MS	By MS/MS	By MS/MS	By MS/MS	By matching
Q5VRZ8	Q5VRZ8	Os06g0112100 protein	Os06g0112100	14102000	10475000	9782600	0	0	0	3	3	3	14	14	14	37.554	0	17.015	48942000	3	15892000	9184000	7891000	0	14627000	1347600	3058900	993280	574000	493190	0	914160	84227	2	1	0	0	0	0	By MS/MS	By MS/MS	By matching		By matching	By matching
Q5VS63	Q5VS63	Os06g0106800 protein	Os06g0106800	0	0	0	0	0	2121900	1	1	1	2.9	2.9	2.9	51.426	0.0016273	7.5095	16477000	3	4943600	4845400	5856500	0	0	831980	1177000	353110	346100	418320	0	0	59427	1	1	1	0	0	0	By MS/MS	By MS/MS	By MS/MS			By matching
Q5VS74;Q5VS73	Q5VS74;Q5VS73	Acetyltransferase component of pyruvate dehydrogenase complex;Dihydrolipoamide acetyltransferase component of pyruvate dehydrogenase complex	P0644B06.24-2;NA	47482000	58599000	47488000	0	34358000	51726000	9	7	6	24.2	20.2	18	59.769	0	48.571	220490000	21	50314000	40308000	51565000	1809100	56840000	19656000	7112600	1623000	1300300	1663400	58358	1833500	634070	4	7	6	1	1	2	By MS/MS	By MS/MS	By MS/MS	By MS/MS	By MS/MS	By MS/MS
Q5VSC2	Q5VSC2	MutT/nudix protein-like	Os06g0141100	13273000	15430000	10704000	0	0	0	3	3	3	12.8	12.8	12.8	43.956	0	20.49	48530000	6	17248000	6494200	15268000	4449800	3433800	1635800	2311000	821350	309250	727060	211890	163520	77896	2	1	2	1	0	0	By MS/MS	By MS/MS	By MS/MS	By MS/MS	By matching	By matching
Q5W6H1	Q5W6H1	Os05g0350500 protein	Os05g0350500	45268000	52106000	44789000	47824000	25583000	29144000	8	8	8	28.8	28.8	28.8	43.197	0	56.229	228120000	15	48302000	49658000	57067000	37193000	25858000	10039000	9918100	2100100	2159000	2481200	1617100	1124300	436470	3	3	4	3	1	1	By MS/MS	By MS/MS	By MS/MS	By MS/MS	By MS/MS	By MS/MS
Q5W6S3	Q5W6S3	Os05g0345400 protein	Os05g0345400	16716000	16430000	13486000	0	14185000	0	5	5	5	7.9	7.9	7.9	114.51	0	32.084	62257000	7	11102000	17892000	18742000	0	13721000	798590	1152900	205600	331340	347080	0	254100	14789	2	2	3	0	0	0	By MS/MS	By MS/MS	By MS/MS		By matching	By matching
Q5W796	Q5W796	Os05g0357600 protein	Os05g0357600	0	0	0	0	0	4166900	1	1	1	4.3	4.3	4.3	44.647	0.00085985	8.4325	15991000	3	2079900	1840600	1125200	3697200	5614700	1633800	695280	90431	80024	48923	160750	244120	71035	1	1	0	0	1	0	By MS/MS	By MS/MS	By matching	By matching	By MS/MS	By matching
Q5WMY3	Q5WMY3	Cytoplasmic ribosomal protein L18	Os05g0155100	44730000	39938000	48250000	80852000	67007000	42807000	6	6	4	28.2	28.2	19.7	21.311	0	44.163	305600000	22	40640000	46793000	59240000	50659000	87778000	20488000	43657000	5805700	6684600	8462900	7237000	12540000	2926800	3	6	6	3	3	1	By MS/MS	By MS/MS	By MS/MS	By MS/MS	By MS/MS	By MS/MS
Q5WN02;A0A0P0WI81	Q5WN02	Os05g0150800 protein	Os05g0150800	146980000	169420000	128470000	192860000	224450000	209650000	8	8	8	45.5	45.5	45.5	30.733	0	77.963	996630000	64	160540000	141630000	125860000	172500000	312150000	83943000	49831000	8027200	7081300	6293100	8625200	15607000	4197100	13	17	12	7	8	7	By MS/MS	By MS/MS	By MS/MS	By MS/MS	By MS/MS	By MS/MS
Q5Z8M4;Q5YM05;Q5Z4G6;Q5YM04	Q5Z8M4;Q5YM05;Q5Z4G6;Q5YM04	Os06g0719600 protein;Os06g0720400 protein;Os06g0720700 protein	P0541C02.38-1;P0535F09.9-1;NA	34804000	38359000	43199000	37977000	32205000	36999000	7	7	7	20.9	20.9	20.9	53.803	0	49.415	222290000	23	34488000	34181000	43782000	21626000	78208000	10001000	7409500	1149600	1139400	1459400	720880	2606900	333360	7	5	7	1	3	0	By MS/MS	By MS/MS	By MS/MS	By MS/MS	By MS/MS	By matching
Q5Z4M6	Q5Z4M6	Os06g0308000 protein	Os06g0308000	21711000	16592000	16738000	18752000	20082000	18692000	6	6	6	18.2	18.2	18.2	59.93	0	40.414	108810000	9	15460000	13189000	14056000	10995000	46973000	8134400	3200200	454710	387920	413420	323390	1381500	239250	3	0	1	1	4	0	By MS/MS	By matching	By MS/MS	By MS/MS	By MS/MS	By matching
Q6K2P9;Q5Z4V2;A0A0P0XK49	Q6K2P9;Q5Z4V2;A0A0P0XK49	Os09g0326900 protein;Os06g0698674 protein;Os09g0326900 protein (Fragment)	P0706E03.4-1;Os06g0698674;NA	0	0	0	0	8037500	0	2	2	2	4.7	4.7	4.7	48.924	0	12.418	10432000	2	0	0	0	0	10432000	0	434650	0	0	0	0	434650	0	0	0	1	0	1	0			By MS/MS		By MS/MS
Q5Z627	Q5Z627	Elongation factor 1-gamma 3	Os06g0571400	96788000	104420000	106700000	103090000	75977000	62862000	12	12	7	37.3	37.3	22.1	47.39	0	87.052	566470000	68	109780000	95574000	135860000	63442000	144190000	17612000	31470000	6099200	5309700	7547900	3524600	8010600	978430	18	17	20	3	9	1	By MS/MS	By MS/MS	By MS/MS	By MS/MS	By MS/MS	By MS/MS
Q5Z6P4	Q5Z6P4	Os06g0264800 protein	Os06g0264800	25389000	20086000	27611000	29165000	51777000	26396000	3	3	3	19.9	19.9	19.9	16.666	0	22.143	170260000	8	18153000	18093000	28342000	42691000	50454000	12524000	24322000	2593300	2584700	4048800	6098800	7207700	1789200	0	1	3	1	2	1	By matching	By MS/MS	By MS/MS	By MS/MS	By MS/MS	By MS/MS
Q5Z6U5	Q5Z6U5	T-complex protein 1 subunit gamma	Os06g0538000	88340000	85031000	95673000	83069000	101320000	77333000	15	15	9	29	29	19.4	60.898	0	107.66	501340000	58	88256000	70700000	99868000	81774000	123210000	37528000	12533000	2206400	1767500	2496700	2044300	3080300	938200	15	10	17	6	9	1	By MS/MS	By MS/MS	By MS/MS	By MS/MS	By MS/MS	By MS/MS
Q5Z739	Q5Z739	Os06g0531900 protein	Os06g0531900	0	0	0	0	0	11004000	1	1	1	4.8	4.8	4.8	42.825	0.00086356	8.6394	72939000	6	6680600	5858800	2729000	16673000	36683000	4314600	3646900	334030	292940	136450	833650	1834100	215730	2	1	1	1	1	0	By MS/MS	By MS/MS	By MS/MS	By MS/MS	By MS/MS	By matching
Q5Z8V9	Q5Z8V9	Delta-aminolevulinic acid dehydratase, chloroplastic	HEMB	36114000	36332000	33112000	19766000	27586000	24045000	7	7	7	20.2	20.2	20.2	46.285	0	46.409	169040000	19	39082000	27900000	41708000	15431000	36525000	8393400	7043300	1628400	1162500	1737800	642960	1521900	349730	4	3	5	2	3	2	By MS/MS	By MS/MS	By MS/MS	By MS/MS	By MS/MS	By MS/MS
Q5Z8Y4	Q5Z8Y4	UDP-sugar pyrophosphorylase	USP	0	16650000	0	0	0	0	3	3	3	7.5	7.5	7.5	67.508	0	17.744	54691000	3	6981200	13832000	20614000	6075500	6647600	540310	1709100	218160	432250	644190	189860	207740	16885	1	0	1	1	0	0	By MS/MS	By MS/MS	By MS/MS	By MS/MS	By matching	By matching
Q5Z907	Q5Z907	Os06g0562600 protein	Os06g0562600	110440000	113210000	128200000	100740000	68630000	109500000	13	13	13	29.2	29.2	29.2	59.131	0	91.904	591640000	45	117230000	92197000	128680000	96178000	121720000	35622000	21130000	4186900	3292700	4595800	3434900	4347300	1272200	10	12	8	5	7	3	By MS/MS	By MS/MS	By MS/MS	By MS/MS	By MS/MS	By MS/MS
Q5Z9H7	Q5Z9H7	Os06g0708600 protein	Os06g0708600	0	0	5173500	0	0	0	1	1	1	21.1	21.1	21.1	11.705	0.0055905	5.9961	16517000	1	5800100	5208900	5507500	0	0	0	2752800	966690	868160	917920	0	0	0	0	1	0	0	0	0	By matching	By MS/MS	By MS/MS
Q5Z9N8;A0A0P0X0X9;A0A0P0X159	Q5Z9N8;A0A0P0X0X9;A0A0P0X159	90 kDa heat shock protein;Os06g0716700 protein (Fragment)	Os06g0716700;Os06g0716700	90159000	90290000	100140000	108440000	94880000	81427000	18	18	18	24.6	24.6	24.6	93.044	0	125.55	554830000	60	72122000	52648000	100530000	105630000	192080000	31819000	13532000	1759100	1284100	2451900	2576300	4684900	776080	10	9	12	10	16	3	By MS/MS	By MS/MS	By MS/MS	By MS/MS	By MS/MS	By MS/MS
Q5ZA96	Q5ZA96	Os06g0320700 protein	Os06g0320700	11850000	12650000	0	0	0	0	3	3	3	6.2	6.2	6.2	69.495	0	18.009	42801000	3	9772800	12234000	8343500	0	8379300	4071300	1188900	271470	339840	231760	0	232760	113090	2	0	1	0	0	0	By MS/MS	By matching	By MS/MS		By matching	By matching
Q5ZA98	Q5ZA98	Chlorophyll a-b binding protein, chloroplastic	Os06g0320500	0	0	0	0	6909100	0	1	1	1	11.6	11.6	11.6	26.186	0.00083822	7.9639	38363000	3	8043500	5480300	6815600	9056800	8967100	0	5480500	1149100	782890	973660	1293800	1281000	0	1	1	0	1	0	0	By MS/MS	By MS/MS	By matching	By MS/MS	By matching
Q5ZAV7	Q5ZAV7	Os01g0783500 protein	Os01g0783500	20228000	27340000	19605000	0	0	0	4	2	2	24.8	20.2	20.2	27.569	0	17.44	63950000	4	20860000	22078000	21012000	0	0	0	5813600	1896400	2007100	1910100	0	0	0	1	2	1	0	0	0	By MS/MS	By MS/MS	By MS/MS	By matching	By matching	By matching
Q5ZBH8	Q5ZBH8	Os01g0618100 protein	Os01g0618100	0	0	0	0	4217200	0	2	2	2	6.4	6.4	6.4	37.915	0.00088417	10.853	15371000	2	3741300	0	0	6156300	5473300	0	809000	196910	0	0	324020	288070	0	1	0	0	1	0	0	By MS/MS			By MS/MS	By matching
Q5ZC51	Q5ZC51	Dipeptide epimerase	Os01g0138900	0	0	7614800	0	0	0	1	1	1	3.8	3.8	3.8	46.63	0.00083126	7.8408	18727000	2	5970300	4650500	8106500	0	0	0	814230	259580	202200	352450	0	0	0	1	0	1	0	0	0	By MS/MS	By matching	By MS/MS
Q5ZC82;A0A0P0V4N4	Q5ZC82;A0A0P0V4N4	Cytokinin riboside 5-monophosphate phosphoribohydrolase LOG;Os01g0588900 protein	LOG;Os01g0588900	18260000	15896000	16633000	12678000	0	10918000	3	3	3	17.8	17.8	17.8	25.846	0	18.559	71735000	9	19856000	9320400	21856000	9719800	5894400	5088100	7173500	1985600	932040	2185600	971980	589440	508810	3	1	3	1	1	0	By MS/MS	By MS/MS	By MS/MS	By MS/MS	By MS/MS	By matching
Q5ZCB1	Q5ZCB1	Os01g0124000 protein	Os01g0124000	0	0	0	0	0	838950	1	1	1	7.5	7.5	7.5	20.1	0.002963	6.4218	9168900	1	1693300	1422800	3478400	1091700	1153700	328940	1528100	282220	237130	579730	181960	192290	54823	0	0	1	0	0	0	By matching	By matching	By MS/MS	By matching	By matching	By matching
Q5ZCV1;A0A0P0V2K1	Q5ZCV1;A0A0P0V2K1	Os01g0375200 protein;Os01g0375200 protein (Fragment)	Os01g0375200;Os01g0375200	26356000	24374000	26662000	16457000	18530000	16576000	7	7	7	20	20	20	54.508	0	43.74	125640000	14	31343000	22372000	33945000	11753000	22439000	3785200	3926200	979460	699130	1060800	367290	701230	118290	4	2	5	2	1	0	By MS/MS	By MS/MS	By MS/MS	By MS/MS	By MS/MS	By matching
Q5ZDH9	Q5ZDH9	Os01g0139200 protein	Os01g0139200	6281600	3446200	8130700	872630	3953100	1617400	3	3	3	5.2	5.2	5.2	70.368	0	19.185	23595000	5	4884400	3864900	6976300	1864300	5046800	957920	943790	195380	154590	279050	74574	201870	38317	2	0	2	0	1	0	By MS/MS	By matching	By MS/MS	By matching	By MS/MS	By matching
Q5ZDJ3;A0A0P0V5B0	Q5ZDJ3	Acetyltransferase 1-like	P0686E09.27-1	564020000	545790000	608680000	518280000	367410000	431930000	28	28	28	35.4	35.4	35.4	103.72	0	291.38	2876400000	225	533420000	443820000	611910000	429240000	689620000	168380000	50463000	9358300	7786400	10735000	7530500	12099000	2954100	51	45	55	22	32	20	By MS/MS	By MS/MS	By MS/MS	By MS/MS	By MS/MS	By MS/MS
Q5ZDZ8	Q5ZDZ8	Os01g0127300 protein	Os01g0127300	18855000	23957000	21723000	0	24237000	28953000	6	6	6	18.9	18.9	18.9	51.614	0	40.563	116170000	11	25531000	23605000	29445000	10803000	18093000	8696200	5051000	1110100	1026300	1280200	469680	786650	378100	2	3	3	1	1	1	By MS/MS	By MS/MS	By MS/MS	By MS/MS	By MS/MS	By MS/MS
Q60E59	Q60E59	Ribosomal protein	Os05g0388500	82272000	59275000	79710000	91229000	99809000	67313000	8	8	8	23.1	23.1	23.1	38.78	0	54.755	449670000	35	85249000	62641000	87927000	90338000	92903000	30616000	28105000	5328100	3915000	5495400	5646100	5806400	1913500	6	6	8	7	5	3	By MS/MS	By MS/MS	By MS/MS	By MS/MS	By MS/MS	By MS/MS
Q60E66;A0A0P0WLW1	Q60E66;A0A0P0WLW1	Os05g0387200 protein;Os05g0387200 protein (Fragment)	Os05g0387200;Os05g0387200	181760000	157250000	141490000	187040000	103820000	140950000	12	12	12	33.6	33.6	33.6	52.87	0	121.61	856350000	73	175160000	131900000	171310000	150670000	176540000	50771000	31717000	6487300	4885300	6344800	5580500	6538300	1880400	18	13	18	9	9	6	By MS/MS	By MS/MS	By MS/MS	By MS/MS	By MS/MS	By MS/MS
Q6YS69;Q60EF6	Q6YS69;Q60EF6	Eukaryotic translation initiation factor 3 subunit I;Eukaryotic translation initiation factor 3 subunit I	B1052H09.108;Os05g0256000	19409000	21185000	18473000	8107100	6911200	8976100	4	4	4	14.1	14.1	14.1	36.378	0	26.478	75465000	9	23755000	11499000	18839000	9934400	6416400	5021200	4439100	1397300	676430	1108200	584380	377430	295370	2	2	3	1	0	1	By MS/MS	By MS/MS	By MS/MS	By MS/MS	By matching	By MS/MS
Q60EJ0	Q60EJ0	Os05g0501700 protein	Os05g0501700	63685000	61802000	54340000	43324000	32661000	34325000	5	5	3	23.9	23.9	19.4	28.321	0	55.831	267430000	25	65369000	60679000	62174000	35941000	29930000	13339000	17829000	4357900	4045300	4144900	2396100	1995300	889260	6	6	5	3	4	1	By MS/MS	By MS/MS	By MS/MS	By MS/MS	By MS/MS	By MS/MS
Q60EM2	Q60EM2	Os05g0455700 protein	Os05g0455700	27330000	26541000	25727000	0	0	0	4	4	4	19.6	19.6	19.6	31.628	0	26.325	87432000	13	26982000	22467000	27223000	4527100	4977100	1256200	4601700	1420100	1182500	1432800	238270	261950	66116	4	3	4	2	0	0	By MS/MS	By MS/MS	By MS/MS	By MS/MS	By MS/MS	By matching
Q9SDD1;Q60EW3	Q9SDD1;Q60EW3	26S proteasome regulatory particle non-ATPase subunit11;Os05g0371200 protein	OsRPN11;Os05g0371200	19570000	22126000	20526000	24757000	14791000	24503000	2	2	2	9.1	9.1	9.1	34.338	0	18.509	113450000	9	19045000	18391000	21618000	24498000	20325000	9574800	8103600	1360300	1313700	1544100	1749800	1451800	683910	1	1	2	2	1	2	By MS/MS	By MS/MS	By MS/MS	By MS/MS	By MS/MS	By MS/MS
Q60EX6;A0A0N7KHQ6;A0A0P0YD65;Q2QM47;A0A0P0YDT6	Q60EX6;A0A0N7KHQ6;A0A0P0YD65;Q2QM47	Serine/threonine-protein phosphatase BSL1 homolog;Serine/threonine-protein phosphatase (Fragment)	BSL1;Os03g0646900	14479000	9351200	11242000	0	0	0	3	3	3	4.2	4.2	4.2	96.281	0	19.916	41566000	5	9655200	9575200	14789000	3110400	2979500	1457200	923700	214560	212780	328640	69121	66211	32382	2	1	2	0	0	0	By MS/MS	By MS/MS	By MS/MS	By matching	By matching	By matching
Q650W6	Q650W6	Os09g0565200 protein	Os09g0565200	0	0	0	0	97336000	20666000	4	4	4	18.3	18.3	18.3	35.425	0	62.405	170120000	9	4359700	3751900	12498000	8391500	135910000	5209300	14177000	363310	312660	1041500	699300	11326000	434110	0	0	1	1	6	1	By matching	By matching	By MS/MS	By MS/MS	By MS/MS	By MS/MS
Q651C7	Q651C7	Os09g0541500 protein	Os09g0541500	0	0	0	0	0	4267000	1	1	1	14	14	14	15.891	0.0016142	7.3924	10232000	1	3728900	3174600	1655900	0	0	1673000	1461800	532700	453520	236560	0	0	239000	0	1	0	0	0	0	By matching	By MS/MS	By matching			By matching
Q651D5	Q651D5	Probable aquaporin PIP2-7	PIP2-7	0	0	3307000	0	0	0	1	1	1	5.5	5.5	5.5	30.316	0.00084388	8.0592	7147900	1	3627400	0	3520500	0	0	0	1191300	604560	0	586750	0	0	0	0	0	1	0	0	0	By matching		By MS/MS
Q651E0	Q651E0	Os09g0540600 protein	Os09g0540600	12632000	12278000	10937000	11407000	7807600	0	2	2	2	7.8	7.8	7.8	44.741	0	19.036	57398000	5	13196000	10356000	10572000	10896000	11010000	1368900	3021000	694500	545040	556400	573500	579470	72046	1	1	1	1	1	0	By MS/MS	By MS/MS	By MS/MS	By MS/MS	By MS/MS	By matching
Q651F0	Q651F0	Os09g0539100 protein	Os09g0539100	122240000	115960000	97080000	100600000	112790000	92159000	11	11	11	34.1	34.1	34.1	47.095	0	88.491	619510000	50	124700000	110000000	120760000	71475000	164580000	27987000	23827000	4796200	4230900	4644600	2749000	6330100	1076400	12	12	11	4	6	5	By MS/MS	By MS/MS	By MS/MS	By MS/MS	By MS/MS	By MS/MS
Q651T8;A0A0P0WZY9;A0A0N7KMJ5	Q651T8	Os06g0662000 protein	Os06g0662000	819260000	781260000	765130000	819050000	727850000	697810000	32	32	14	67.7	67.7	28.7	68.468	0	323.31	4473000000	300	856950000	716070000	851660000	803620000	989090000	255600000	117710000	22551000	18844000	22412000	21148000	26029000	6726300	60	57	59	44	50	30	By MS/MS	By MS/MS	By MS/MS	By MS/MS	By MS/MS	By MS/MS
Q652L5;A0A0N7KRA5;A0A0P0XRE8	Q652L5;A0A0N7KRA5;A0A0P0XRE8	Os09g0567350 protein;Os09g0567366 protein (Fragment)	OJ1155_H10.28-1;Os09g0567366	14971000	18317000	16771000	19250000	27475000	22744000	4	4	4	16.1	16.1	16.1	42.217	0	31.386	120630000	9	15006000	13117000	17767000	11795000	56397000	6546200	5744200	714590	624640	846030	561680	2685600	311720	1	1	2	1	3	1	By MS/MS	By MS/MS	By MS/MS	By MS/MS	By MS/MS	By MS/MS
Q652L9	Q652L9	Os09g0567000 protein	Os09g0567000	0	0	6922800	0	0	0	2	2	2	6.6	6.6	6.6	54.508	0.00091912	11.701	27855000	3	5851000	5920000	7369800	0	8714000	0	1466000	307950	311580	387880	0	458630	0	0	1	1	0	1	0	By matching	By MS/MS	By MS/MS		By MS/MS
Q652S1;A0A0P0WVE0	Q652S1;A0A0P0WVE0	Os06g0258900 protein;Os06g0258900 protein (Fragment)	P0603C10.39-1;Os06g0258900	0	0	0	55784000	41112000	37376000	4	4	4	3.9	3.9	3.9	147.44	0	27.325	145740000	5	6641600	6569200	6045100	80467000	36086000	9928200	2112100	96254	95205	87611	1166200	522990	143890	0	0	1	2	2	0	By matching	By matching	By MS/MS	By MS/MS	By MS/MS	By matching
Q653F5	Q653F5	Os06g0687800 protein	Os06g0687800	0	0	0	0	950320	0	1	1	1	2.6	2.6	2.6	61.075	0.0050287	6.1534	4877700	1	930990	1162000	1551300	0	1233400	0	168200	32103	40070	53494	0	42531	0	0	0	1	0	0	0	By matching	By matching	By MS/MS		By matching
Q653V9	Q653V9	Os06g0683200 protein	Os06g0683200	53587000	54117000	63533000	80410000	52238000	58870000	3	3	3	16.8	16.8	16.8	20.796	0	23.058	336940000	23	54557000	42709000	69627000	77961000	68597000	23491000	48134000	7793800	6101200	9946700	11137000	9799500	3355800	4	4	5	3	4	3	By MS/MS	By MS/MS	By MS/MS	By MS/MS	By MS/MS	By MS/MS
Q654L9	Q654L9	Acetyltransferase component of pyruvate dehydrogenase complex	Os06g0499900	18050000	18782000	22599000	0	0	0	4	4	4	8.3	8.3	8.3	52.383	0	23.91	63997000	9	18118000	16116000	23329000	3514700	0	2918900	2461400	696840	619840	897290	135180	0	112270	4	2	3	0	0	0	By MS/MS	By MS/MS	By MS/MS	By matching		By matching
Q654U8;A0A0P0WUZ1	Q654U8	Pyrophosphate--fructose 6-phosphate 1-phosphotransferase subunit beta	PFP-BETA	1586500000	1415100000	1324200000	1284300000	1140400000	1194000000	20	20	20	43.7	43.7	43.7	61.261	0	259.17	7660900000	292	1237400000	997090000	1364900000	1264800000	2299800000	496840000	283740000	45830000	36929000	50552000	46846000	85177000	18402000	59	60	60	40	44	29	By MS/MS	By MS/MS	By MS/MS	By MS/MS	By MS/MS	By MS/MS
Q655S1	Q655S1	ATP-dependent zinc metalloprotease FTSH 2, chloroplastic	FTSH2	0	0	0	0	19458000	0	2	2	2	7.4	7.4	7.4	72.537	0	24.652	43294000	4	7562800	5405100	5071600	0	25254000	0	1273300	222440	158970	149160	0	742760	0	1	1	1	0	1	0	By MS/MS	By MS/MS	By MS/MS		By MS/MS
Q655T1	Q655T1	Phosphoglycerate kinase	Os06g0668200	0	0	0	0	0	88534000	7	1	1	22.2	3.7	3.7	42.278	0.0022814	6.7269	272060000	4	0	0	76933000	67122000	93288000	34713000	10076000	0	0	2849400	2486000	3455100	1285700	0	0	1	1	1	1	By matching	By matching	By MS/MS	By MS/MS	By MS/MS	By MS/MS
Q655Y9	Q655Y9	Os06g0664200 protein	P0473H04.3-1	0	0	0	0	0	4010500	1	1	1	3.7	3.7	3.7	43.24	0.0056457	6.0345	17216000	2	3479700	2976200	3737000	2373900	3076600	1572500	1076000	217480	186010	233560	148370	192280	98279	0	1	1	0	0	0	By matching	By MS/MS	By MS/MS	By matching	By matching	By matching
Q656F2	Q656F2	Esterase/lipase/thioesterase family protein-like	Os01g0579900	8401700	8388800	8823400	0	0	0	2	2	2	8.7	8.7	8.7	30.38	0.00090662	11.274	25621000	4	8553700	7130800	9024200	912680	0	0	1601300	534610	445670	564010	57042	0	0	2	1	1	0	0	0	By MS/MS	By MS/MS	By MS/MS	By matching
Q656T5	Q656T5	Os01g0574600 protein	Os01g0574600	73574000	87686000	83428000	99579000	124620000	93052000	7	7	7	33.4	33.4	33.4	34.838	0	60.725	537790000	43	79189000	72152000	87718000	76740000	185440000	36556000	35853000	5279300	4810200	5847900	5116000	12363000	2437100	8	8	8	6	8	5	By MS/MS	By MS/MS	By MS/MS	By MS/MS	By MS/MS	By MS/MS
Q657L8;Q657L5;Q657L6;Q657L7;A0A0P0V4A4	Q657L8;Q657L5;Q657L6;Q657L7	Peptidylprolyl isomerase;Peptidylprolyl isomerase;Peptidylprolyl isomerase	P0468H06.14-1;P0468H06.14-5;NA	11419000	10866000	11584000	9232200	10746000	9400900	3	3	3	7.4	7.4	7.4	72.873	0	18.099	60948000	5	10082000	8606500	12214000	13768000	13337000	2940100	2176700	360080	307370	436230	491720	476320	105000	2	0	1	1	1	0	By MS/MS	By matching	By MS/MS	By MS/MS	By MS/MS	By matching
Q65X08;A0A0P0WPN5;A0A0P0WPI9	Q65X08;A0A0P0WPN5	Os05g0519400 protein;Os05g0519400 protein (Fragment)	Os05g0519400;Os05g0519400	14531000	12252000	11772000	0	18486000	10484000	7	7	7	12.7	12.7	12.7	81.128	0	44.28	72275000	9	14118000	12094000	14332000	3491500	26201000	2038900	1853200	361990	310090	367490	89525	671830	52280	2	2	3	2	0	0	By MS/MS	By MS/MS	By MS/MS	By MS/MS	By matching	By matching
Q65X97	Q65X97	ATP-dependent 6-phosphofructokinase	PFK	0	0	0	0	0	3813700	5	1	1	10.6	2.5	2.5	62.553	0.0043732	6.2598	15085000	1	2243100	1750700	2607800	2375400	4612500	1495300	502830	74771	58357	86926	79181	153750	49843	0	0	0	0	1	0	By matching	By matching	By matching	By matching	By MS/MS	By matching
Q65XA0	Q65XA0	Probable glutathione S-transferase DHAR1, cytosolic	DHAR1	25568000	21019000	34106000	19475000	48559000	26312000	3	3	3	23.5	23.5	23.5	23.57	0	23.681	174170000	14	28880000	20900000	34699000	19807000	61689000	8195500	12441000	2062800	1492900	2478500	1414800	4406400	585390	4	3	3	2	1	1	By MS/MS	By MS/MS	By MS/MS	By MS/MS	By MS/MS	By MS/MS
Q65XA1;Q94CS6	Q65XA1	Os05g0116000 protein	Os05g0116000	425410000	337230000	346640000	207000000	151970000	192550000	13	13	13	52.4	52.4	52.4	38.194	0	113.33	1568700000	133	465230000	312410000	416940000	145430000	148190000	80492000	87150000	25846000	17356000	23163000	8079700	8232900	4471800	35	30	32	11	14	11	By MS/MS	By MS/MS	By MS/MS	By MS/MS	By MS/MS	By MS/MS
Q65XD0	Q65XD0	Glycosyltransferase	Os05g0527800	0	0	0	0	0	5511800	1	1	1	4.8	4.8	4.8	52.944	0.0008569	8.3193	30253000	3	4913700	3807300	1822400	6306600	11241000	2161100	1260500	204740	158640	75935	262770	468390	90046	1	1	0	1	0	0	By MS/MS	By MS/MS	By matching	By MS/MS	By matching	By matching
Q65XH8	Q65XH8	Os05g0106600 protein	Os05g0106600	34473000	36663000	0	25106000	22430000	24363000	12	2	0	41.6	6.1	0	41.695	0	15.917	144370000	12	31488000	27915000	14725000	24904000	35284000	10055000	6874800	1499400	1329300	701190	1185900	1680200	478790	3	3	2	1	1	2	By MS/MS	By MS/MS	By MS/MS	By MS/MS	By MS/MS	By MS/MS
Q67G20	Q67G20	Actin	Act	31210000	41382000	32365000	47384000	29954000	27455000	13	3	2	45.9	13.3	7.7	41.622	0	33.769	209370000	13	43046000	40498000	38813000	40539000	35089000	11386000	9970000	2049800	1928500	1848200	1930400	1670900	542180	2	4	1	3	3	0	By MS/MS	By MS/MS	By MS/MS	By MS/MS	By MS/MS	By MS/MS
Q67IX6	Q67IX6	Protein disulfide isomerase-like 1-4	PDIL1-4	10009000	9760000	11544000	0	0	0	3	3	3	7.6	7.6	7.6	62.252	0	20.717	40777000	6	7606400	9305200	13313000	1561800	2441800	6548700	1456300	271660	332330	475470	55780	87208	233880	1	1	2	1	1	0	By MS/MS	By MS/MS	By MS/MS	By MS/MS	By MS/MS	By matching
Q67IZ7	Q67IZ7	Os09g0461800 protein	Os09g0461800	0	0	4469800	0	0	0	1	1	1	4	4	4	34.201	0.0015662	7.0057	10646000	6	3235900	2651300	4758400	0	0	0	532280	161800	132560	237920	0	0	0	2	1	2	0	1	0	By MS/MS	By MS/MS	By MS/MS		By MS/MS
Q67J09	Q67J09	Os09g0460400 protein	Os09g0460400	0	0	14849000	15417000	28916000	15990000	4	4	4	18.1	18.1	18.1	33.24	0	30.535	118950000	10	24743000	21043000	25203000	16070000	25862000	6024300	11895000	2474300	2104300	2520300	1607000	2586200	602430	2	2	2	1	3	0	By MS/MS	By MS/MS	By MS/MS	By MS/MS	By MS/MS	By matching
Q67J16;A0A0N7KQX9;A0A0P0XPE1	Q67J16	Os09g0459800 protein	B1045B05.39-1	85228000	84429000	92049000	133400000	121100000	106070000	15	15	15	31.1	31.1	31.1	68.434	0	106.75	613930000	36	89259000	66145000	93101000	68122000	258540000	38758000	15742000	2288700	1696000	2387200	1746700	6629300	993810	7	6	6	4	10	3	By MS/MS	By MS/MS	By MS/MS	By MS/MS	By MS/MS	By MS/MS
Q67U26	Q67U26	Villin-3	VLN3	14823000	14203000	14373000	11280000	26437000	14530000	6	6	4	7.2	7.2	4.3	108.72	0	40.137	99865000	12	21796000	14426000	26649000	7825800	21527000	7641900	1958100	427370	282850	522530	153450	422100	149840	3	2	4	1	2	0	By MS/MS	By MS/MS	By MS/MS	By MS/MS	By MS/MS	By matching
Q67UF5	Q67UF5	Protein disulfide isomerase-like 2-3	PDIL2-3	33827000	35702000	26618000	34798000	25870000	31958000	7	7	7	22.9	22.9	22.9	47.334	0	49.323	179860000	26	42562000	37301000	38609000	32157000	23196000	6038800	8993200	2128100	1865100	1930500	1607800	1159800	301940	8	6	7	3	1	1	By MS/MS	By MS/MS	By MS/MS	By MS/MS	By MS/MS	By MS/MS
Q67UK9	Q67UK9	Probable glutathione S-transferase DHAR2, chloroplastic	DHAR2	15268000	14635000	14825000	23277000	23268000	24075000	4	4	4	25	25	25	29.682	0	28.154	98536000	8	18522000	15452000	15597000	15145000	21323000	12497000	5474200	1029000	858460	866490	841390	1184600	694280	2	1	2	2	1	0	By MS/MS	By MS/MS	By MS/MS	By MS/MS	By MS/MS	By matching
Q67UX7;Q7XR06;A0A0N7KMN4;Q5Z6F5	Q67UX7	Probable protein phosphatase 2C 10	Os02g0149800	15960000	18633000	16192000	11346000	11010000	10011000	4	4	4	17.2	17.2	17.2	37.568	0	27.202	78998000	12	15777000	14311000	17764000	6768800	19966000	4412200	3434700	685980	622200	772330	294290	868070	191840	3	3	3	1	2	0	By MS/MS	By MS/MS	By MS/MS	By MS/MS	By MS/MS	By matching
Q67VM2;Q67VM1	Q67VM2;Q67VM1	Os06g0632200 protein;Os06g0632200 protein	P0505A04.10-1;P0505A04.10-2	92689000	86626000	56106000	71155000	94806000	82762000	6	6	6	21.9	21.9	21.9	52.76	0	48.215	461420000	29	105100000	90833000	76526000	60885000	106870000	21205000	25634000	5838900	5046300	4251500	3382500	5937100	1178000	8	6	7	2	4	2	By MS/MS	By MS/MS	By MS/MS	By MS/MS	By MS/MS	By MS/MS
Q67VQ4	Q67VQ4	BolA-like	Os06g0484600	0	8809300	0	0	57434000	0	1	1	1	11.4	11.4	11.4	17.608	0.00087719	10.447	110730000	4	8048300	7357700	15150000	0	74480000	5692000	12303000	894250	817520	1683400	0	8275600	632450	0	1	0	0	2	1	By matching	By MS/MS	By matching		By MS/MS	By MS/MS
Q67VZ1	Q67VZ1	Annexin	Os06g0221200	22698000	34864000	34666000	24790000	36299000	20958000	9	9	8	34.7	34.7	32.5	35.72	0	59.227	168170000	17	35206000	19756000	34838000	17549000	50707000	10115000	7311800	1530700	858940	1514700	763000	2204600	439790	5	3	4	1	3	1	By MS/MS	By MS/MS	By MS/MS	By MS/MS	By MS/MS	By MS/MS
Q67W29	Q67W29	Probable 4-hydroxy-tetrahydrodipicolinate reductase 1, chloroplastic	DAPB1	20937000	22935000	14520000	0	0	16346000	5	5	5	21	21	21	37.381	0	88.432	125330000	15	23446000	21262000	18859000	17981000	40647000	3130300	7372100	1379200	1250700	1109300	1057700	2391000	184140	5	3	3	1	2	1	By MS/MS	By MS/MS	By MS/MS	By MS/MS	By MS/MS	By MS/MS
Q67W51	Q67W51	50S ribosomal protein L35	Os06g0647100	0	0	0	0	0	19717000	1	1	1	9.6	9.6	9.6	15.652	0.0016327	7.5559	108060000	6	15814000	11002000	14955000	34779000	23782000	7730700	18010000	2635700	1833700	2492400	5796400	3963700	1288500	1	1	1	1	1	1	By MS/MS	By MS/MS	By MS/MS	By MS/MS	By MS/MS	By MS/MS
Q67W57	Q67W57	Os06g0646500 protein	Os06g0646500	11271000	10066000	10391000	0	25137000	0	3	3	3	16	16	16	25.065	0	21.774	74324000	8	14674000	10902000	13996000	8645600	24027000	2079600	4954900	978240	726820	933080	576380	1601800	138640	2	2	3	0	1	0	By MS/MS	By MS/MS	By MS/MS	By matching	By MS/MS	By matching
Q67WM1	Q67WM1	Isoleucyl-tRNA synthetase-like	P0017B12.25-2	29095000	32383000	32769000	0	43590000	0	3	3	3	20.5	20.5	20.5	26.152	0	30.006	159410000	15	31597000	29820000	39384000	15325000	43285000	0	13284000	2633100	2485000	3282000	1277100	3607000	0	4	5	3	1	2	0	By MS/MS	By MS/MS	By MS/MS	By MS/MS	By MS/MS
Q67WM2	Q67WM2	Os06g0645400 protein	P0017B12.25-1	38796000	34127000	42271000	26319000	30355000	28941000	9	9	9	13.2	13.2	13.2	96.654	0	63.477	202030000	23	38754000	34701000	42496000	20849000	58346000	6879900	4391800	842490	754360	923820	453230	1268400	149560	7	5	7	2	2	0	By MS/MS	By MS/MS	By MS/MS	By MS/MS	By MS/MS	By matching
Q67WR2	Q67WR2	Probable GDP-L-fucose synthase 1	Os06g0652400	29682000	24517000	25467000	24564000	17006000	11975000	7	7	7	38.4	38.4	38.4	35.715	0	44.1	128490000	15	35956000	31245000	30574000	9766700	17402000	3546200	8030600	2247300	1952800	1910900	610420	1087600	221640	6	2	5	0	2	0	By MS/MS	By MS/MS	By MS/MS	By matching	By MS/MS	By matching
Q67WU6	Q67WU6	Purple acid phosphatase	Os06g0643900	15448000	13927000	13770000	0	9062500	12331000	2	2	2	8.6	8.6	8.6	55.155	0	21.727	61736000	6	15039000	11444000	14728000	4092700	11248000	5184700	2684200	653870	497550	640350	177940	489030	225420	2	2	2	0	0	0	By MS/MS	By MS/MS	By MS/MS	By matching	By matching	By matching
Q688M9	Q688M9	putative endo-1,31,4-beta-D-glucanase	Os05g0399100	30062000	25632000	31059000	25652000	17697000	23196000	3	3	3	13.3	13.3	13.3	25.769	0	19.471	141050000	16	29221000	22107000	31319000	26651000	22365000	9386500	8297000	1718900	1300400	1842300	1567700	1315600	552140	4	3	4	3	2	0	By MS/MS	By MS/MS	By MS/MS	By MS/MS	By MS/MS	By matching
Q688X1	Q688X1	Eukaryotic translation initiation factor 3 subunit D	Os05g0566500	19226000	20874000	15232000	0	0	14510000	4	4	4	9.4	9.4	9.4	65.08	0	25.337	84339000	6	16112000	18135000	19097000	12456000	13065000	5473800	3373500	644490	725390	763880	498230	522590	218950	1	1	1	1	1	1	By MS/MS	By MS/MS	By MS/MS	By MS/MS	By MS/MS	By MS/MS
Q69IK7	Q69IK7	Os02g0800000 protein	Os02g0800000	40514000	44457000	47312000	55188000	63716000	51268000	8	8	8	22.8	22.8	22.8	49.166	0	59.308	285910000	26	62142000	53925000	68136000	30116000	57063000	14531000	14296000	3107100	2696300	3406800	1505800	2853100	726550	5	5	7	3	3	3	By MS/MS	By MS/MS	By MS/MS	By MS/MS	By MS/MS	By MS/MS
Q69IM6	Q69IM6	Os09g0514600 protein	Os09g0514600	0	8536700	8870300	7830300	6951600	7371800	2	2	2	16.5	16.5	16.5	17.146	0	12.872	42004000	3	5032900	7117600	9831500	7734100	9764900	2522900	5250500	629110	889700	1228900	966760	1220600	315370	0	0	0	1	2	0	By matching	By matching	By matching	By MS/MS	By MS/MS	By matching
Q69IN8	Q69IN8	Os09g0513000 protein	Os09g0513000	9424200	9324900	9528300	6309300	0	7115700	4	4	4	21.3	21.3	21.3	35.522	0	25.799	40214000	10	10338000	9322700	9883300	4954700	3416100	2298300	2680900	689230	621510	658890	330320	227740	153220	4	3	3	0	0	0	By MS/MS	By MS/MS	By MS/MS	By matching	By matching	By matching
Q69JX7	Q69JX7	Drought-induced S-like ribonuclease	Os09g0537700	249090000	207490000	236600000	190830000	101520000	403540000	5	5	5	30.2	30.2	30.2	28.398	0	82.267	1272000000	58	307510000	213990000	329300000	162130000	145820000	113280000	115640000	27956000	19453000	29936000	14739000	13256000	10298000	15	15	15	3	4	6	By MS/MS	By MS/MS	By MS/MS	By MS/MS	By MS/MS	By MS/MS
Q69K00	Q69K00	Os09g0535000 protein	P0569E11.2-1	15315000	0	11280000	0	0	0	2	2	2	8.6	8.6	8.6	32.393	0	12.982	40992000	4	15492000	2740900	11820000	0	9592600	1346600	2411300	911270	161230	695320	0	564270	79214	2	1	1	0	0	0	By MS/MS	By MS/MS	By MS/MS		By matching	By matching
Q69LA6;Q53NW9;A0A0N7KRJ5	Q69LA6;Q53NW9	Probable pyridoxal 5-phosphate synthase subunit PDX1.1;Os11g0708500 protein	PDX11;LOC_Os11g48080	0	0	0	0	0	14564000	5	1	1	20.1	3.8	3.8	33.736	0.0015924	7.2081	72894000	9	14027000	9292100	11581000	19182000	13101000	5710300	4287900	825090	546600	681260	1128400	770660	335900	2	2	2	1	1	1	By MS/MS	By MS/MS	By MS/MS	By MS/MS	By MS/MS	By MS/MS
Q69LD2	Q69LD2	Os07g0170100 protein	Os07g0170100	30859000	34785000	28657000	39109000	0	46925000	5	5	5	21.4	21.4	21.4	39.726	0	37.32	173850000	19	29434000	37612000	44542000	27503000	20621000	14135000	8692400	1471700	1880600	2227100	1375100	1031000	706740	6	4	4	2	2	1	By MS/MS	By MS/MS	By MS/MS	By MS/MS	By MS/MS	By MS/MS
Q69LE7	Q69LE7	Probable polyribonucleotide nucleotidyltransferase 1, chloroplastic	PNP1	57363000	48285000	56669000	53923000	50768000	43297000	13	13	13	19.1	19.1	19.1	97.399	0	91.268	290950000	28	72063000	64271000	84148000	17680000	39675000	13110000	7656500	1896400	1691300	2214400	465260	1044100	345000	8	6	8	2	4	0	By MS/MS	By MS/MS	By MS/MS	By MS/MS	By MS/MS	By matching
Q69LL7	Q69LL7	Os08g0313200 protein	B1136D08.130	14311000	15879000	16423000	0	0	0	2	2	2	12.8	12.8	12.8	25.139	0	15.995	68468000	3	14384000	12899000	17781000	0	14918000	8485900	5705600	1198700	1074900	1481700	0	1243100	707160	1	1	1	0	0	0	By MS/MS	By MS/MS	By MS/MS		By matching	By matching
Q69LQ9;A0A0P0WKF1	Q69LQ9	Os08g0299000 protein	Os08g0299000	23092000	17514000	20929000	0	0	0	5	5	5	27.2	27.2	27.2	33.547	0	32.432	61026000	11	23661000	15269000	20753000	0	0	1343000	3211900	1245300	803630	1092300	0	0	70685	5	2	4	0	0	0	By MS/MS	By MS/MS	By MS/MS			By matching
Q69MW7	Q69MW7	DNA binding protein PF1	Os09g0402100	0	4755500	4754700	4897300	0	0	2	2	2	14.6	14.6	14.6	21.753	0	12.032	21734000	4	4313000	3953200	5083800	4832800	2749800	801620	1975800	392090	359380	462160	439340	249980	72874	0	1	1	1	1	0	By matching	By MS/MS	By MS/MS	By MS/MS	By MS/MS	By matching
Q69MX3	Q69MX3	Os09g0407900 protein	Os09g0407900	0	0	5728100	0	0	0	2	2	2	4.2	4.2	4.2	64.305	0.00090334	11.154	19448000	1	7013000	6337500	6097900	0	0	0	748020	269730	243750	234540	0	0	0	0	0	1	0	0	0	By matching	By MS/MS	By MS/MS
Q69N33	Q69N33	Dihydrolipoamide acetyltransferase component of pyruvate dehydrogenase complex	Os09g0408600	17066000	15680000	16013000	18850000	14141000	14952000	5	5	5	12.8	12.8	12.8	52.29	0	35.692	92489000	14	20471000	15259000	17893000	14787000	19814000	4265100	3425500	758190	565150	662690	547660	733870	157970	3	3	2	2	3	1	By MS/MS	By MS/MS	By MS/MS	By MS/MS	By MS/MS	By MS/MS
Q69NF7	Q69NF7	Os09g0530000 protein	Os09g0530000	6824000	16483000	17797000	18806000	28851000	21613000	3	3	3	13.1	13.1	13.1	25.476	0	23.392	99326000	4	2829200	16639000	19906000	21291000	28797000	9864800	7640500	217630	1279900	1531200	1637700	2215100	758830	0	0	1	1	2	0	By matching	By matching	By MS/MS	By MS/MS	By MS/MS	By matching
Q69P55	Q69P55	Os09g0422000 protein	Os09g0422000	0	9768100	0	0	0	0	2	2	2	7	7	7	47.466	0	14.358	15047000	2	4081700	8115000	2850400	0	0	0	752350	204080	405750	142520	0	0	0	1	1	0	0	0	0	By MS/MS	By MS/MS	By matching
Q69P84;Q69P83	Q69P84	Aldehyde dehydrogenase	OJ1344_B01.27-1	83390000	77937000	80617000	111510000	80087000	66242000	12	12	12	32.6	32.6	32.6	54.501	0	88.822	462760000	41	123960000	98069000	113520000	52123000	52205000	22881000	20120000	5389600	4263900	4935500	2266200	2269800	994840	14	9	11	4	2	1	By MS/MS	By MS/MS	By MS/MS	By MS/MS	By MS/MS	By MS/MS
Q69Q02	Q69Q02	4-alpha-glucanotransferase DPE2	DPE2	74712000	81235000	81310000	53433000	44413000	45302000	11	11	11	16	16	16	108.29	0	81.91	362920000	38	76595000	71285000	106710000	56965000	39719000	11651000	7560900	1595700	1485100	2223100	1186800	827480	242740	11	8	11	3	4	1	By MS/MS	By MS/MS	By MS/MS	By MS/MS	By MS/MS	By MS/MS
Q69QQ2	Q69QQ2	Os09g0482200 protein	Os09g0482200	19536000	16626000	19300000	14700000	8510900	10049000	4	4	4	12.6	12.6	12.6	49.742	0	27.909	79689000	11	21340000	19524000	9824600	14708000	9343300	4948600	4427200	1185500	1084700	545810	817130	519070	274920	4	1	3	2	1	0	By MS/MS	By MS/MS	By MS/MS	By MS/MS	By MS/MS	By matching
Q69QQ6	Q69QQ6	Heat shock protein 81-2	HSP81-2	0	0	0	0	4018600	0	25	1	1	40.5	2.1	2.1	80.199	0.00082713	7.7707	15204000	3	4872900	0	5115800	0	5215600	0	447180	143320	0	150460	0	153400	0	1	0	1	0	1	0	By MS/MS	By matching	By MS/MS	By matching	By MS/MS	By matching
Q69RJ0;A0A0P0X9S7;A0A0P0X9Q0	Q69RJ0;A0A0P0X9S7	Ferredoxin-dependent glutamate synthase, chloroplastic;Os07g0658400 protein (Fragment)	GLU;Os07g0658400	1000100000	922680000	969060000	846500000	756860000	860350000	50	50	50	45.1	45.1	45.1	175.04	0	323.31	5115100000	322	941910000	788160000	1036300000	790700000	1242500000	315480000	61627000	11348000	9495900	12486000	9526400	14970000	3801000	73	65	73	36	49	26	By MS/MS	By MS/MS	By MS/MS	By MS/MS	By MS/MS	By MS/MS
Q69RL1	Q69RL1	Os07g0468100 protein	Os07g0468100	23230000	27747000	20733000	43081000	28222000	27860000	4	4	4	20.7	20.7	20.7	25.826	0	36.256	160700000	15	24625000	23590000	25705000	39879000	37154000	9748600	11479000	1759000	1685000	1836000	2848500	2653900	696330	3	4	4	2	2	0	By MS/MS	By MS/MS	By MS/MS	By MS/MS	By MS/MS	By matching
Q69RN2	Q69RN2	Chitinase III-like protein	Os07g0500300	119310000	94726000	81097000	0	18731000	50604000	4	4	4	43.4	43.4	43.4	18.916	0	34.785	330320000	19	115950000	75928000	77211000	0	40207000	21023000	36702000	12883000	8436400	8579000	0	4467500	2335900	7	5	4	0	1	2	By MS/MS	By MS/MS	By MS/MS		By MS/MS	By MS/MS
Q69S39	Q69S39	Cytochrome b6-f complex iron-sulfur subunit, chloroplastic	petC	0	0	6827600	0	0	0	2	2	2	13.3	13.3	13.3	23.884	0	14.114	31726000	3	6472700	4869300	7268400	0	13115000	0	2884200	588430	442660	660770	0	1192300	0	1	0	1	0	1	0	By MS/MS	By matching	By MS/MS		By MS/MS
Q69T31	Q69T31	Cytosolic invertase 1	CINV1	10338000	9925100	14762000	0	13235000	0	5	2	2	11.6	6	6	63.45	0	14.99	60142000	11	9772900	7318200	14884000	2751500	20373000	5042700	2227500	361960	271050	551250	101910	754570	186760	3	1	3	2	2	0	By MS/MS	By MS/MS	By MS/MS	By MS/MS	By MS/MS	By matching
Q69TT2;A0A0P0WX14	Q69TT2;A0A0P0WX14	Os06g0476200 protein;Os06g0476200 protein	Os06g0476200;Os06g0476200	12445000	11907000	13007000	9075400	0	0	4	4	4	11	11	11	67.763	0	22.947	50218000	5	11130000	14028000	14194000	5043400	4509000	1314100	1477000	327340	412590	417470	148330	132620	38649	2	0	3	0	0	0	By MS/MS	By matching	By MS/MS	By matching	By matching	By matching
Q69TY5	Q69TY5	Stromal processing peptidase, chloroplastic	SPP	163930000	174250000	146090000	143760000	117780000	127600000	15	15	15	18.1	18.1	18.1	138.68	0	124.55	808060000	76	156030000	140930000	164950000	123070000	168710000	54383000	14177000	2737400	2472400	2893800	2159100	2959700	954100	21	16	16	10	7	6	By MS/MS	By MS/MS	By MS/MS	By MS/MS	By MS/MS	By MS/MS
Q69UI1	Q69UI1	40S ribosomal protein S13-2	Os08g0117300	94885000	97660000	107030000	137380000	104230000	85695000	5	5	2	39.7	39.7	14.6	17.145	0	38.037	693830000	46	94220000	79008000	100980000	136880000	247070000	35675000	86729000	11778000	9876000	12623000	17110000	30884000	4459400	7	8	7	8	10	6	By MS/MS	By MS/MS	By MS/MS	By MS/MS	By MS/MS	By MS/MS
Q69UI3	Q69UI3	Os08g0117100 protein	Os08g0117100	6235200	5309000	5852700	0	0	0	2	2	2	7.5	7.5	7.5	35.941	0	14.053	28474000	7	6259000	4336800	6299600	1101800	8661700	1814700	1581900	347720	240930	349980	61211	481210	100820	2	1	2	1	1	0	By MS/MS	By MS/MS	By MS/MS	By MS/MS	By MS/MS	By matching
Q69UI8	Q69UI8	Os08g0116500 protein	Os08g0116500	44284000	42705000	40902000	0	0	57251000	2	2	2	45.5	45.5	45.5	11.082	0	20.924	202070000	9	46158000	40917000	45041000	24516000	20901000	24539000	67358000	15386000	13639000	15014000	8172100	6966900	8179700	2	2	2	1	1	1	By MS/MS	By MS/MS	By MS/MS	By MS/MS	By MS/MS	By MS/MS
Q69UU3;A0A0P0X1V6	Q69UU3;A0A0P0X1V6	Os07g0108300 protein;Os07g0108300 protein (Fragment)	P0585H11.115;Os07g0108300	474960000	504320000	508670000	512630000	488390000	492870000	17	17	17	46.4	46.4	46.4	53.655	0	178.22	2982000000	182	465770000	426550000	575030000	551400000	745880000	217360000	114690000	17914000	16406000	22117000	21208000	28688000	8360000	40	38	38	23	26	17	By MS/MS	By MS/MS	By MS/MS	By MS/MS	By MS/MS	By MS/MS
Q69UZ3;A0A0P0XAM0	Q69UZ3	Lon protease homolog, mitochondrial	Os07g0689300	8466500	9446700	10792000	0	0	0	4	4	4	5.6	5.6	5.6	109.54	0	25.23	60267000	4	8386100	8015100	11361000	15691000	10293000	6521800	1181700	164430	157160	222760	307660	201820	127880	1	1	2	0	0	0	By MS/MS	By MS/MS	By MS/MS	By matching	By matching	By matching
Q69V57	Q69V57	Fructose-bisphosphate aldolase	Os06g0608700	0	0	0	0	10203000	0	3	2	2	11.2	7.3	7.3	37.754	0	14.201	72356000	5	15447000	13931000	15905000	11399000	13242000	2431800	3288900	702150	633230	722950	518120	601910	110540	1	1	1	1	1	0	By MS/MS	By MS/MS	By MS/MS	By MS/MS	By MS/MS	By matching
Q69WA8	Q69WA8	Os07g0687500 protein	OJ1150_E04.123	0	0	4145100	0	0	0	1	1	1	6	6	6	33.144	0.0056617	6.0548	4412700	1	0	0	4412700	0	0	0	232250	0	0	232250	0	0	0	0	0	1	0	0	0			By MS/MS
Q69WH2	Q69WH2	Os06g0332800 protein	Os06g0332800	24525000	26644000	25655000	15824000	13902000	10844000	1	1	1	9.9	9.9	9.9	13.621	0.00084602	8.0869	112380000	13	23541000	21092000	29131000	14997000	19255000	4367800	16055000	3363000	3013100	4161500	2142400	2750700	623970	3	3	2	2	2	1	By MS/MS	By MS/MS	By MS/MS	By MS/MS	By MS/MS	By MS/MS
Q69X22;Q0DRE3	Q69X22	Phospholipase D	Os06g0604200	99950000	83314000	91677000	84817000	72807000	77032000	15	14	11	26.4	25.1	20.3	92.513	0	104.43	490600000	31	77598000	59380000	82603000	85560000	154010000	31445000	10012000	1583600	1211800	1685800	1746100	3143100	641740	7	5	6	5	6	2	By MS/MS	By MS/MS	By MS/MS	By MS/MS	By MS/MS	By MS/MS
Q69XG4	Q69XG4	Os06g0610800 protein	P0490F09.29-1	18208000	13999000	10374000	0	0	0	3	3	3	8.7	8.7	8.7	53.043	0	19.769	68609000	4	16779000	14195000	9276900	4445700	22665000	1246600	3611000	883100	747130	488260	233980	1192900	65612	2	1	0	0	1	0	By MS/MS	By MS/MS	By matching	By matching	By MS/MS	By matching
Q69XQ6	Q69XQ6	Ribose-phosphate pyrophosphokinase 2, chloroplastic	Os06g0617800	0	0	0	5277400	0	0	1	1	1	6	6	6	43.085	0.0015314	6.7962	11901000	2	4279100	2389000	0	5233200	0	0	566730	203770	113760	0	249200	0	0	1	1	0	0	0	0	By MS/MS	By MS/MS		By matching
Q69Y99;Q0DDV4;A0A0P0WU69;A0A0N7KLP9	Q69Y99;Q0DDV4	Chaperonin;Os06g0196900 protein	P0528E04.36-1;Os06g0196900	0	5634800	8223000	0	0	0	3	3	3	14.3	14.3	14.3	26.319	0	20.211	17293000	5	1610600	4693500	8738000	0	2250900	0	1017200	94742	276090	514000	0	132410	0	0	1	2	1	1	0	By matching	By MS/MS	By MS/MS	By MS/MS	By MS/MS
Q69YA2	Q69YA2	3-oxoacyl-[acyl-carrier-protein] synthase	Os06g0196600	44070000	40110000	33766000	37007000	37078000	29216000	7	7	4	26	26	13.5	49.049	0	69.825	225730000	21	48066000	38615000	40712000	17222000	76292000	4826200	14108000	3004100	2413400	2544500	1076300	4768200	301640	5	4	2	1	7	2	By MS/MS	By MS/MS	By MS/MS	By MS/MS	By MS/MS	By MS/MS
Q6ASR0;C7J287;A0A0P0WHV9	Q6ASR0	Os05g0147500 protein	Os05g0147500	224520000	234010000	283040000	223940000	173450000	207270000	12	12	12	26.5	26.5	26.5	65.127	0	158.25	1334100000	69	193400000	154610000	214050000	298370000	408960000	64728000	49412000	7163000	5726100	7927900	11051000	15147000	2397400	17	16	18	10	5	3	By MS/MS	By MS/MS	By MS/MS	By MS/MS	By MS/MS	By MS/MS
Q6ASR1;A0A0N7KK53	Q6ASR1	Chaperonin protein	Os05g0147400	167240000	160430000	163330000	172060000	179610000	203330000	16	16	16	41.5	41.5	41.5	59.233	0	179.25	963940000	84	163570000	139140000	177910000	188110000	218790000	76422000	33239000	5640300	4797800	6134800	6486700	7544400	2635200	19	19	19	11	10	6	By MS/MS	By MS/MS	By MS/MS	By MS/MS	By MS/MS	By MS/MS
Q6ASV4;A0A0P0W308;Q84U04;Q7XV14;Q7XV18	Q6ASV4	Glutamate decarboxylase	B1377B10.13	81284000	103060000	91857000	84497000	117580000	117510000	11	11	8	30.1	30.1	21.5	55.065	0	79.498	550010000	57	85750000	93105000	111960000	51760000	161500000	45933000	22917000	3572900	3879400	4665000	2156700	6729100	1913900	10	13	13	5	11	5	By MS/MS	By MS/MS	By MS/MS	By MS/MS	By MS/MS	By MS/MS
Q6AT40	Q6AT40	Os05g0558900 protein	Os05g0558900	51312000	62602000	61826000	75944000	60455000	70850000	9	9	9	21	21	21	67.412	0	61.646	365980000	28	74204000	55950000	86822000	42612000	86769000	19625000	8713900	1766800	1332200	2067200	1014600	2065900	467260	6	7	6	4	4	1	By MS/MS	By MS/MS	By MS/MS	By MS/MS	By MS/MS	By MS/MS
Q6ATB2;Q75IS2	Q6ATB2	Probable GTP diphosphokinase CRSH2, chloroplastic	CRSH2	295680000	268730000	263220000	320550000	207780000	255300000	17	17	17	44.9	44.9	44.9	60.273	0	183.16	1566000000	115	336390000	282520000	312190000	225380000	296990000	112560000	55930000	12014000	10090000	11150000	8049300	10607000	4020200	25	24	25	13	19	9	By MS/MS	By MS/MS	By MS/MS	By MS/MS	By MS/MS	By MS/MS
Q6ATQ2	Q6ATQ2	Protein phosphatase	OSJNBa0028F23.19	6045700	0	8158100	0	0	0	2	2	2	5.8	5.8	5.8	50.921	0	12.769	21491000	3	6044900	2593700	8685600	1971700	1835500	359480	895450	251870	108070	361900	82153	76479	14978	1	0	2	0	0	0	By MS/MS	By matching	By MS/MS	By matching	By matching	By matching
Q6ATS0;A0A0N7KI96	Q6ATS0;A0A0N7KI96	Magnesium-chelatase subunit ChlD, chloroplastic;Mg-protoporphyrin IX chelatase (Fragment)	CHLD;Os03g0811100	17489000	18110000	17500000	0	0	0	4	4	4	6.1	6.1	6.1	81.878	0	25.264	56871000	5	16933000	14998000	19282000	1172000	1499300	2986300	1387100	413000	365810	470290	28585	36567	72838	1	1	3	0	0	0	By MS/MS	By MS/MS	By MS/MS	By matching	By matching	By matching
Q6AUF3	Q6AUF3	Urease accessory protein G	UREG	52776000	42212000	45682000	48047000	34166000	46917000	6	6	6	31	31	31	30.781	0	41.157	245740000	29	36752000	44259000	63030000	40946000	42516000	18239000	16383000	2450100	2950600	4202000	2729700	2834400	1215900	7	6	7	2	4	3	By MS/MS	By MS/MS	By MS/MS	By MS/MS	By MS/MS	By MS/MS
Q6AUF5	Q6AUF5	60S ribosomal protein L18a	Os05g0565000	31811000	27963000	25852000	35395000	36014000	39943000	4	4	1	27	27	7.9	21.459	0	30.026	182880000	17	30726000	22613000	27101000	33504000	53944000	14988000	18288000	3072600	2261300	2710100	3350400	5394400	1498800	4	3	4	2	4	0	By MS/MS	By MS/MS	By MS/MS	By MS/MS	By MS/MS	By matching
Q6AUN5	Q6AUN5	Os05g0568900 protein	Os05g0568900	0	0	0	6674600	0	0	2	2	2	7.3	7.3	7.3	45.529	0	13.709	11250000	3	1391700	1228100	2011400	6618600	0	0	592100	73250	64634	105860	348350	0	0	1	1	0	1	0	0	By MS/MS	By MS/MS	By matching	By MS/MS
Q6AV23	Q6AV23	Os03g0619400 protein	LOC_Os03g42220	155420000	170470000	141950000	154580000	131620000	150280000	14	14	9	38.9	38.9	26.5	57.228	0	114.25	834840000	78	177450000	150420000	152400000	134060000	163550000	56951000	26089000	5545300	4700800	4762600	4189500	5110900	1779700	19	19	18	6	10	6	By MS/MS	By MS/MS	By MS/MS	By MS/MS	By MS/MS	By MS/MS
Q6AVA8;Q75KR1	Q6AVA8	Pyruvate, phosphate dikinase 1, chloroplastic	PPDK1	318610000	339270000	349390000	354560000	389080000	388010000	22	22	22	38.9	38.9	38.9	102.79	0	223.78	2072200000	150	379840000	304610000	392960000	374640000	490920000	129260000	43172000	7913400	6346000	8186600	7805100	10227000	2693000	32	34	36	18	21	9	By MS/MS	By MS/MS	By MS/MS	By MS/MS	By MS/MS	By MS/MS
Q6AVG6	Q6AVG6	4-hydroxy-3-methylbut-2-enyl diphosphate reductase, chloroplastic	ISPH	132530000	117570000	130550000	92784000	69929000	82429000	10	10	10	30.7	30.7	30.7	51.063	0	74.65	602230000	41	150350000	123650000	163610000	63982000	75956000	24680000	25093000	6264700	5152000	6817200	2665900	3164800	1028300	11	13	11	2	3	1	By MS/MS	By MS/MS	By MS/MS	By MS/MS	By MS/MS	By MS/MS
Q6AVI0;B9FJG3	Q6AVI0	Zinc finger BED domain-containing protein RICESLEEPER 2	Os03g0733400	111230000	106750000	84945000	70408000	65533000	109710000	10	10	5	20.8	20.8	10.9	80.975	0	101.14	527710000	40	136530000	117030000	117520000	41662000	92761000	22212000	17590000	4550900	3901000	3917200	1388700	3092000	740420	12	9	9	2	5	3	By MS/MS	By MS/MS	By MS/MS	By MS/MS	By MS/MS	By MS/MS
Q6AVI7	Q6AVI7	Expressed protein	OSJNBa0022C08.20	0	0	4291000	0	0	0	2	2	2	6.7	6.7	6.7	48.764	0	14.367	26824000	4	6937900	3305700	4568000	5311900	4776500	1924400	1490200	385440	183650	253780	295100	265360	106910	0	1	0	1	1	1	By matching	By MS/MS	By matching	By MS/MS	By MS/MS	By MS/MS
Q6AVT2;A0A0P0W2L6	Q6AVT2;A0A0P0W2L6	Glucose-1-phosphate adenylyltransferase large subunit 1, chloroplastic/amyloplastic;Os03g0735000 protein (Fragment)	AGPL1;Os03g07	0	0	0	6399600	0	0	2	2	2	5.7	5.7	5.7	55.426	0	13.13	29078000	5	6276200	5425600	7288600	6346000	2604500	1137100	807720	174340	150710	202460	176280	72347	31587	1	1	1	1	1	0	By MS/MS	By MS/MS	By MS/MS	By MS/MS	By MS/MS	By matching
Q6AVZ8;Q0DKZ2	Q6AVZ8;Q0DKZ2	Peroxidase;Os05g0134400 protein	prx65;Os05g0134400	51740000	58773000	37901000	0	52562000	56277000	5	5	5	22.8	22.8	22.8	37.613	0	40.108	242700000	21	58740000	40391000	45094000	6086000	71961000	20424000	15168000	3671200	2524400	2818400	380380	4497600	1276500	7	5	7	0	2	0	By MS/MS	By MS/MS	By MS/MS	By matching	By MS/MS	By matching
Q6EP22;A0A0P0VS41	Q6EP22	Cell division inhibitor-like	P0264G11.15-1	17402000	22505000	21667000	18892000	0	14617000	4	4	4	14.5	14.5	14.5	38.812	0	29.051	94659000	14	17626000	17294000	29518000	14010000	10416000	5796900	5258800	979200	960770	1639900	778320	578640	322050	3	4	4	2	1	0	By MS/MS	By MS/MS	By MS/MS	By MS/MS	By MS/MS	By matching
Q6EP34;Q6EP33	Q6EP34;Q6EP33	Peroxidase;Peroxidase	P0264G11.1-1;P0264G11.1-2	0	0	4745700	0	0	0	2	2	2	8.3	8.3	8.3	30.39	0	13.215	13869000	2	5273500	3543200	5052100	0	0	0	1155700	439460	295260	421010	0	0	0	1	0	1	0	0	0	By MS/MS	By matching	By MS/MS
Q6EPN6	Q6EPN6	2-C-methyl-D-erythritol 2,4-cyclodiphosphate synthase, chloroplastic	ISPF	0	0	0	0	0	11143000	1	1	1	8.1	8.1	8.1	23.524	0.0015504	6.9001	43572000	7	8810400	10283000	8760200	6444800	4904500	4369200	3961100	800950	934810	796390	585890	445870	397200	1	2	2	1	0	1	By MS/MS	By MS/MS	By MS/MS	By MS/MS	By matching	By MS/MS
Q6ER67;A0A0P0VIA4;B7F845	Q6ER67;A0A0P0VIA4;B7F845	Ribosomal protein;Os02g0321900 protein (Fragment);60S ribosomal protein L10a	Os02g0321900;Os02g0321900;NA	21906000	29852000	24269000	18382000	18366000	19324000	2	2	1	11.6	11.6	5.1	24.64	0	15.988	120090000	18	21667000	26202000	23740000	17746000	22300000	8435600	12009000	2166700	2620200	2374000	1774600	2230000	843560	4	4	4	2	3	1	By MS/MS	By MS/MS	By MS/MS	By MS/MS	By MS/MS	By MS/MS
Q6ER90	Q6ER90	Os02g0538000 protein	Os02g0538000	31810000	36124000	35335000	43958000	39520000	39762000	9	9	9	14.7	14.7	14.7	76.937	0	61.982	217010000	31	46749000	36976000	46624000	37093000	40657000	8909900	5710800	1230200	973070	1227000	976120	1069900	234470	7	9	9	2	3	1	By MS/MS	By MS/MS	By MS/MS	By MS/MS	By MS/MS	By MS/MS
Q6ER94	Q6ER94	2-Cys peroxiredoxin BAS1, chloroplastic	BAS1	109860000	119540000	93004000	77116000	54560000	75200000	5	5	5	26.8	26.8	26.8	28.097	0	39.868	486550000	34	122930000	73575000	106440000	61494000	87444000	34666000	30409000	7683200	4598400	6652200	3843400	5465200	2166600	10	8	6	6	2	2	By MS/MS	By MS/MS	By MS/MS	By MS/MS	By MS/MS	By MS/MS
Q6ERL4	Q6ERL4	Os09g0338400 protein	Os09g0338400	13131000	12171000	13884000	10621000	13199000	14278000	5	5	5	14	14	14	50.025	0	32.847	71162000	10	14281000	8968700	16296000	6539900	18906000	6170700	2453900	492450	309270	561940	225510	651920	212780	3	1	2	1	2	1	By MS/MS	By MS/MS	By MS/MS	By MS/MS	By MS/MS	By MS/MS
Q6ERW7;Q6ERW9;Q0JA75	Q6ERW7;Q6ERW9	Probable cinnamyl alcohol dehydrogenase 8C;Probable cinnamyl alcohol dehydrogenase 8B	CAD8C;CAD8B	220740000	183810000	186310000	184250000	149560000	187440000	8	8	8	28.5	28.5	28.5	45.852	0	73.15	1078700000	64	243710000	185870000	222930000	144370000	196200000	85578000	53934000	12186000	9293500	11147000	7218700	9810100	4278900	14	13	14	7	9	7	By MS/MS	By MS/MS	By MS/MS	By MS/MS	By MS/MS	By MS/MS
Q6ES10	Q6ES10	Probable histone acetyltransferase type B catalytic subunit	HATB	0	0	0	0	0	14324000	2	2	2	9	9	9	52.112	0	13.173	58273000	2	5611300	4634800	4203900	0	38206000	5616100	2913600	280570	231740	210200	0	1910300	280800	1	0	0	0	1	0	By MS/MS	By matching	By matching		By MS/MS	By matching
Q6ES92	Q6ES92	Exocyst subunit Exo70 family protein	Os09g0347300	14224000	12838000	16707000	0	79942000	20340000	1	1	1	2	2	2	67.201	0.0022489	6.5212	149560000	2	14659000	10159000	21754000	7440800	82563000	12984000	6231700	610780	423310	906420	310030	3440100	541000	0	0	0	0	2	0	By MS/MS	By matching	By matching	By matching	By MS/MS	By matching
Q6ESB6	Q6ESB6	Os02g0833400 protein	Os02g0833400	0	0	0	0	5723300	0	1	1	1	5.4	5.4	5.4	36.931	0.00086957	9.282	7428200	0	0	0	0	0	7428200	0	390960	0	0	0	0	390960	0	0	0	0	0	0	0					By MS/MS
Q6ESI7;A0A0N7KFU2;A0A0P0VML9	Q6ESI7;A0A0N7KFU2	Tripeptidyl-peptidase 2;Os02g0664300 protein (Fragment)	TPP2;Os02g0664300	451030000	519450000	573020000	459950000	514490000	479640000	39	39	39	39.1	39.1	39.1	148.63	0	318.5	2818700000	200	457320000	430520000	563840000	362460000	805230000	199370000	40851000	6627800	6239500	8171600	5253000	11670000	2889400	40	44	46	22	34	14	By MS/MS	By MS/MS	By MS/MS	By MS/MS	By MS/MS	By MS/MS
Q6ESK5	Q6ESK5	Peptidyl-prolyl cis-trans isomerase	Os09g0411700	0	0	0	0	677850	0	1	1	1	6.1	6.1	6.1	15.368	0.0029718	6.4383	14821000	3	5256800	3417900	5266400	0	879760	0	1852600	657100	427240	658300	0	109970	0	1	1	1	0	0	0	By MS/MS	By MS/MS	By MS/MS		By matching
Q6ESR4	Q6ESR4	Dehydrin DHN1	DHN1	20210000	18826000	27119000	11141000	18845000	11314000	3	3	3	10	10	10	30.922	0	21.391	103420000	15	19702000	15820000	27609000	12296000	23045000	4947400	9401900	1791100	1438200	2509900	1117800	2095000	449760	2	4	5	1	2	1	By MS/MS	By MS/MS	By MS/MS	By MS/MS	By MS/MS	By MS/MS
Q6ET88;A0A0P0VMR6	Q6ET88;A0A0P0VMR6	Os02g0668100 protein;Os02g0668100 protein (Fragment)	Os02g0668100;Os02g0668100	13325000	11569000	9400400	0	0	0	3	3	3	16.1	16.1	16.1	35.96	0	26.377	58409000	5	13064000	9543300	10371000	12340000	10048000	3041900	4172100	933160	681660	740800	881450	717730	217280	2	1	1	0	1	0	By MS/MS	By MS/MS	By MS/MS	By matching	By MS/MS	By matching
Q6ETI3	Q6ETI3	Os02g0158900 protein	Os02g0158900	0	0	0	0	0	16008000	1	1	1	2.1	2.1	2.1	44.488	0.0056537	6.0466	35610000	2	3874200	0	0	11510000	13949000	6276700	1874200	203900	0	0	605800	734170	330350	0	0	0	0	1	1	By matching			By matching	By MS/MS	By MS/MS
Q6ETK1	Q6ETK1	Os02g0180200 protein	Os02g0180200	28709000	30745000	32349000	45106000	32179000	24869000	5	5	5	37.3	37.3	37.3	20.154	0	37.54	196800000	26	26529000	30415000	41168000	40045000	45280000	13361000	16400000	2210800	2534600	3430700	3337000	3773300	1113400	5	6	5	4	5	1	By MS/MS	By MS/MS	By MS/MS	By MS/MS	By MS/MS	By MS/MS
Q6EU14;A0A0P0WDM1;Q7XSA2;A0A0P0VN80;A0A0P0WDZ5;Q6K972	Q6EU14;A0A0P0WDM1;Q7XSA2	Protein argonaute 1A;Os04g0566500 protein (Fragment);Protein argonaute 1B	AGO1A;Os04g0566500;NA	22373000	20215000	20657000	0	15188000	0	4	4	4	4.5	4.5	4.5	120.45	0	26.851	82229000	8	22464000	19910000	28837000	2974900	6378700	1663600	1495100	408440	362010	524300	54088	115980	30247	3	2	3	0	0	0	By MS/MS	By MS/MS	By MS/MS	By matching	By matching	By matching
Q6EUD7;Q6EUD8;A0A0P0VH17	Q6EUD7	Os02g0244700 protein	Os02g0244700	102880000	125050000	118220000	133800000	147150000	126610000	23	16	15	28.2	22.4	21.4	109.93	0	127.3	742390000	58	94877000	91197000	132540000	142460000	236990000	44332000	14007000	1790100	1720700	2500700	2687900	4471400	836460	11	13	12	5	14	3	By MS/MS	By MS/MS	By MS/MS	By MS/MS	By MS/MS	By MS/MS
Q6EUF8;A0A0P0VGU3	Q6EUF8;A0A0P0VGU3	Citrate synthase;Citrate synthase (Fragment)	Os02g0232400;Os02g0232400	133130000	130150000	163320000	112910000	155970000	147470000	9	9	9	26.6	26.6	26.6	54.64	0	86.479	819430000	48	140250000	121060000	171150000	87499000	245840000	53630000	40972000	7012400	6053000	8557600	4375000	12292000	2681500	13	13	10	4	4	4	By MS/MS	By MS/MS	By MS/MS	By MS/MS	By MS/MS	By MS/MS
Q6EUK2	Q6EUK2	Os02g0234800 protein	Os02g0234800	26614000	20715000	20317000	0	33779000	26392000	6	6	6	28.5	28.5	28.5	31.999	0	39.351	115830000	11	27942000	22569000	28568000	0	26888000	9863100	6813600	1643600	1327600	1680500	0	1581700	580180	3	1	2	0	4	1	By MS/MS	By MS/MS	By MS/MS		By MS/MS	By MS/MS
Q6EUP4;Q7XTE8	Q6EUP4;Q7XTE8	14-3-3-like protein GF14-E;14-3-3-like protein GF14-B	GF14E;GF14B	68493000	74287000	68229000	58006000	66997000	60705000	12	6	6	51.1	31.7	31.7	29.692	0	61.469	366750000	35	74593000	73117000	68642000	54848000	71137000	24416000	21574000	4387800	4301000	4037800	3226400	4184500	1436200	10	8	8	4	2	3	By MS/MS	By MS/MS	By MS/MS	By MS/MS	By MS/MS	By MS/MS
Q6EUQ9	Q6EUQ9	Os02g0175400 protein	Os02g0175400	0	0	11763000	0	49717000	0	20	2	2	45.4	6.4	6.4	68.591	0	15.139	97334000	5	7543100	4730000	11540000	7796000	65725000	0	2630600	203870	127840	311880	210700	1776400	0	1	1	1	0	2	0	By MS/MS	By MS/MS	By MS/MS	By MS/MS	By MS/MS	By matching
Q6F2U9	Q6F2U9	Lysine--tRNA ligase	Os03g0586800	112760000	118160000	122420000	93150000	110280000	91680000	13	13	13	26.4	26.4	26.4	68.387	0	92.586	631890000	72	114600000	107570000	134340000	55690000	190050000	29637000	19746000	3581100	3361600	4198100	1740300	5939100	926150	17	16	23	5	9	2	By MS/MS	By MS/MS	By MS/MS	By MS/MS	By MS/MS	By MS/MS
Q6F322;Q10M77	Q6F322;Q10M77	Os05g0490700 protein;Os03g0320400 protein	Os05g0490700;LOC_Os03g20430	0	0	0	0	2258800	0	2	1	1	3.1	1.8	1.8	73.563	0.00086806	8.9782	17732000	2	4500900	4152100	4153700	1993700	2931600	0	738840	187540	173010	173070	83071	122150	0	1	1	0	0	0	0	By MS/MS	By MS/MS	By matching	By matching	By matching
Q6F332	Q6F332	Calmodulin-2	CAM2	0	0	0	0	0	16295000	2	1	1	13.4	8.7	8.7	16.818	0.0015835	7.117	50373000	1	3952400	9561900	10335000	14492000	5642400	6389100	5597000	439150	1062400	1148400	1610200	626930	709900	0	0	0	1	0	0	By matching	By matching	By matching	By MS/MS	By matching	By matching
Q6F362;Q9LGI2;Q94JJ7;Q94JJ4;Q7GBK0;Q94JE1;Q943L2;Q6ZBP3;A3AGM4;A0A0P0XHD8;A0A0P0WN72;B9G1J0;A0A0P0UY08;A0A0P0V310	Q6F362;Q9LGI2;Q94JJ7;Q94JJ4;Q7GBK0;Q94JE1;Q943L2;Q6ZBP3;A3AGM4;A0A0P0XHD8;A0A0P0WN72	Histone H2B.9;Histone H2B.10;Histone H2B.3	H2B.9;H2B.10;H2B.3	140650000	108930000	131430000	100600000	350940000	70617000	5	5	1	34.9	34.9	4.6	16.256	0	52.674	973540000	43	132720000	95492000	123100000	86581000	495520000	40134000	121690000	16591000	11937000	15387000	10823000	61939000	5016700	12	11	10	3	6	1	By MS/MS	By MS/MS	By MS/MS	By MS/MS	By MS/MS	By MS/MS
Q6F3B0;A0A0P0VMI3;Q0JB88;Q0DYZ8	Q6F3B0	DnaJ protein, putative, expressed	LOC_Os03g57340	46902000	48016000	55410000	52359000	43015000	50691000	7	7	4	18.7	18.7	12.2	46.69	0	50.956	284740000	36	57780000	50830000	71924000	42250000	50981000	10970000	14986000	3041100	2675300	3785500	2223700	2683200	577360	9	7	9	5	3	3	By MS/MS	By MS/MS	By MS/MS	By MS/MS	By MS/MS	By MS/MS
Q6F4N5	Q6F4N5	Aspartyl protease 25	AP25	0	0	0	0	1368300	0	1	1	1	5.3	5.3	5.3	45.077	0.0029696	6.4291	13715000	1	4155100	2524400	3390200	1869100	1775900	0	1142900	346260	210360	282520	155760	147990	0	1	0	0	0	0	0	By MS/MS	By matching	By matching	By matching	By matching
Q6H436	Q6H436	Os09g0280300 protein	Os09g0280300	14921000	16874000	15078000	12588000	16181000	17317000	3	3	3	9.5	9.5	9.5	39.397	0	19.545	84614000	10	15781000	13318000	16919000	7790600	23129000	7675700	4977300	928300	783420	995250	458270	1360500	451510	2	3	3	1	1	0	By MS/MS	By MS/MS	By MS/MS	By MS/MS	By MS/MS	By matching
Q6H443;A0A0P0XJD2	Q6H443;A0A0P0XJD2	Os09g0279500 protein;Os09g0279500 protein (Fragment)	Os09g0279500;Os09g0279500	44965000	43304000	51307000	51214000	48209000	38168000	5	5	5	26.1	26.1	26.1	26.681	0	35.824	263780000	22	53563000	41735000	64383000	40683000	50487000	12924000	20290000	4120200	3210400	4952500	3129500	3883600	994170	6	4	6	2	3	1	By MS/MS	By MS/MS	By MS/MS	By MS/MS	By MS/MS	By MS/MS
Q6H4L2;Q7XTK1;A0A0P0W6A1;A0A0P0VJL8;A0A0N7KIH5;A0A0P0VJQ0;A0A0P0VJN8;A0A0P0VJM7;Q8W0C4	Q6H4L2;Q7XTK1;A0A0P0W6A1;A0A0P0VJL8;A0A0N7KIH5;A0A0P0VJQ0;A0A0P0VJN8	Elongation factor 2;Elongation factor;Os04g0118400 protein (Fragment)	Os02g0519900;Os04g0118400;NA	1855700000	1866600000	2051000000	1564400000	2093100000	1559800000	30	30	17	42	42	28.8	94.02	0	323.31	10692000000	399	1844200000	1721000000	2110200000	1673200000	2753400000	590290000	248660000	42888000	40024000	49075000	38912000	64033000	13728000	86	81	78	44	68	42	By MS/MS	By MS/MS	By MS/MS	By MS/MS	By MS/MS	By MS/MS
Q6H4P7;Q0J0N6;A0A0P0XNS9	Q6H4P7;Q0J0N6	Os09g0378300 protein;Os09g0503400 protein	Os09g0378300;Os09g0503400	14535000	13472000	14628000	11915000	15120000	0	4	4	4	4.5	4.5	4.5	123.46	0	23.094	69946000	6	19768000	17115000	21595000	4038800	6416600	1012800	1249000	353000	305620	385630	72121	114580	18086	2	1	1	0	2	0	By MS/MS	By MS/MS	By MS/MS	By matching	By MS/MS	By matching
Q6H4V4	Q6H4V4	Os02g0167700 protein	Os02g0167700	0	8070500	10431000	0	9607700	0	5	5	5	6.7	6.7	6.7	134.27	0	28.705	44591000	4	10607000	8088300	8142300	3587200	13920000	246510	686020	163190	124430	125270	55188	214150	3792.4	0	1	1	0	2	0	By MS/MS	By MS/MS	By MS/MS	By matching	By MS/MS	By matching
Q6H4W2	Q6H4W2	Os02g0167100 protein	OSJNBa0085K21.31	7383300	0	7414700	5921000	5932300	6649500	2	2	2	8.5	8.5	8.5	34.32	0	11.918	34244000	5	7047700	3219400	7764600	5799000	7554900	2858500	2282900	469840	214630	517640	386600	503660	190570	2	0	1	0	2	0	By MS/MS	By matching	By MS/MS	By matching	By MS/MS	By matching
Q6H547;A0A0N7KFE2;Q7XV85	Q6H547	Ribonuclease	Os02g0523500	248600000	250160000	234610000	166140000	165060000	187570000	22	22	22	31.3	31.3	31.3	108.18	0	190.37	1154300000	103	264470000	213650000	248180000	121100000	228250000	78623000	24047000	5509700	4451000	5170500	2523000	4755300	1638000	23	20	27	11	15	7	By MS/MS	By MS/MS	By MS/MS	By MS/MS	By MS/MS	By MS/MS
Q6H6C7	Q6H6C7	Phosphoglycerate kinase	Os02g0169300	97862000	107880000	122160000	100550000	106390000	86114000	14	10	6	37.8	34.3	21.9	42.107	0	86.559	634690000	54	74218000	68565000	99643000	67164000	282520000	42582000	24411000	2854500	2637100	3832400	2583200	10866000	1637800	8	7	10	8	14	7	By MS/MS	By MS/MS	By MS/MS	By MS/MS	By MS/MS	By MS/MS
Q6H6I1	Q6H6I1	3-isopropylmalate dehydratase, small subunit-like	Os02g0655300	0	0	6105400	0	0	0	2	2	2	12.8	12.8	12.8	26.471	0	13.27	25028000	2	7400500	5902900	6499600	1466200	2044400	1714100	2502800	740050	590290	649960	146620	204440	171410	1	0	1	0	0	0	By MS/MS	By matching	By MS/MS	By MS/MS	By matching	By matching
Q6H703;A0A0P0VFF6	Q6H703	Glyceraldehyde-3-phosphate dehydrogenase	Os02g0171100	27611000	32807000	32757000	0	0	39473000	7	6	3	30.4	28.5	17.5	43.317	0	47.133	139220000	14	36634000	35502000	34059000	11208000	13472000	8346300	5354700	1409000	1365500	1310000	431100	518160	321010	4	4	5	0	0	1	By MS/MS	By MS/MS	By MS/MS	By matching	By matching	By MS/MS
Q6H713	Q6H713	Glycine cleavage system H protein	Os02g0170100	0	0	5011500	0	0	0	1	1	1	9.5	9.5	9.5	17.058	0.00082034	7.6474	9498100	1	0	4163100	5335000	0	0	0	1583000	0	693850	889170	0	0	0	0	0	1	0	0	0		By matching	By MS/MS
Q6H734	Q6H734	Os02g0198600 protein	Os02g0198600	0	0	0	0	0	2023000	1	1	1	3.4	3.4	3.4	45.646	0.0015279	6.75	13873000	3	2420600	2464400	3114500	2791300	2289000	793210	603170	105240	107150	135410	121360	99521	34487	1	1	1	0	0	0	By MS/MS	By MS/MS	By MS/MS	By matching	By matching	By matching
Q6H7I9	Q6H7I9	ATP-dependent Clp protease proteolytic subunit	Os02g0634500	407430000	437840000	430840000	359580000	438230000	402370000	8	8	7	28.9	28.9	26.5	31.96	0	116.21	2461200000	85	471150000	427430000	462110000	196200000	719140000	185180000	175800000	33654000	30530000	33008000	14014000	51367000	13227000	19	20	20	8	10	8	By MS/MS	By MS/MS	By MS/MS	By MS/MS	By MS/MS	By MS/MS
Q6H7Q6;A0A0P0VG02	Q6H7Q6;A0A0P0VG02	Lipoxygenase;Lipoxygenase (Fragment)	Os02g0194700;Os02g0194700	162290000	186120000	187380000	128080000	175720000	178660000	21	21	21	26.9	26.9	26.9	103.58	0	175.44	978300000	80	177790000	156380000	207850000	110340000	267960000	57967000	21267000	3865000	3399700	4518400	2398800	5825300	1260200	21	18	19	3	13	6	By MS/MS	By MS/MS	By MS/MS	By MS/MS	By MS/MS	By MS/MS
Q6H7T1;Q7XSA6	Q6H7T1;Q7XSA6	Os02g0162500 protein;40S ribosomal protein S14	Os02g0162500;Os02g0534800	92188000	92832000	107930000	75690000	72319000	67114000	5	5	5	42	42	42	16.363	0	38.505	465300000	46	103590000	89131000	130310000	60601000	49057000	32609000	77551000	17266000	14855000	21719000	10100000	8176100	5434800	11	8	11	8	4	4	By MS/MS	By MS/MS	By MS/MS	By MS/MS	By MS/MS	By MS/MS
Q6H8D6;A0A0P0VGA6;Q6H8D5;A0A0N7KEW9	Q6H8D6;A0A0P0VGA6;Q6H8D5	Putative coatomer subunit beta-3;Os02g0209000 protein (Fragment)	Os02g0209000;Os02g0209000	12403000	14566000	11504000	0	17097000	0	7	4	4	10.7	7.7	7.7	102.84	0	32.232	69985000	7	15991000	11029000	14033000	11902000	17030000	0	1707000	390030	268990	342270	290300	415360	0	2	1	2	1	1	0	By MS/MS	By MS/MS	By MS/MS	By MS/MS	By MS/MS	By matching
Q6H8H3	Q6H8H3	Os02g0652600 protein	Os02g0652600	48366000	54855000	49378000	0	62254000	55116000	2	2	2	10.3	10.3	10.3	25.505	0	15.029	323430000	21	50549000	45975000	50561000	41529000	112940000	21870000	40428000	6318700	5746900	6320100	5191100	14118000	2733700	5	5	5	1	4	1	By MS/MS	By MS/MS	By MS/MS	By MS/MS	By MS/MS	By MS/MS
Q6I5V5;Q0JHB3	Q6I5V5	Amidophosphoribosyltransferase	Os05g0430800	39130000	40339000	54045000	48191000	41253000	36747000	4	4	4	7.6	7.6	7.6	58.154	0	26.214	238370000	21	30756000	36948000	63192000	51996000	38655000	16819000	8219500	1060600	1274100	2179000	1793000	1332900	579950	2	6	6	3	2	2	By MS/MS	By MS/MS	By MS/MS	By MS/MS	By MS/MS	By MS/MS
Q6I5Y3	Q6I5Y3	Os05g0389500 protein	Os05g0389500	7246600	8381500	9859200	0	0	6558600	2	2	2	10.8	10.8	10.8	43.408	0	12.698	29491000	3	7585800	7762600	9368400	555860	1742000	2476400	1638400	421430	431260	520470	30881	96776	137580	1	0	2	0	0	0	By MS/MS	By matching	By MS/MS	By matching	By matching	By matching
Q6J657	Q6J657	Cell death associated protein	Os05g0410200	0	0	0	5069700	0	0	1	1	1	3.6	3.6	3.6	39.126	0.0050179	6.1359	14754000	1	2907600	2225100	4594400	5027200	0	0	702580	138460	105960	218780	239390	0	0	0	0	1	0	0	0	By matching	By matching	By MS/MS	By matching
Q6K1T2;A0A0P0VLY2	Q6K1T2;A0A0P0VLY2	Lysine--tRNA ligase;Lysine--tRNA ligase	Os02g0623500;Os02g0623500	34982000	34315000	37444000	27351000	31865000	43877000	6	6	6	13.3	13.3	13.3	65.832	0	41.207	200640000	13	47901000	29326000	30807000	7224200	71543000	13835000	6687900	1596700	977530	1026900	240810	2384800	461170	3	3	6	0	0	1	By MS/MS	By MS/MS	By MS/MS	By matching	By matching	By MS/MS
Q6K1W6;Q6ZIA1	Q6K1W6;Q6ZIA1	Os09g0258600 protein;Os08g0530200 protein	Os09g0258600;Os08g0530200	0	0	0	12781000	0	0	2	2	2	10.5	10.5	10.5	19.495	0	12.281	31630000	8	3974900	2685900	5790000	12673000	2954300	3551500	3163000	397490	268590	579000	1267300	295430	355150	2	2	1	2	1	0	By MS/MS	By MS/MS	By MS/MS	By MS/MS	By MS/MS	By matching
Q6K215;A0A0P0VM00;Q7XUA6	Q6K215;A0A0P0VM00;Q7XUA6	Probable aquaporin PIP2-2;Os02g0629200 protein;Probable aquaporin PIP2-3	PIP2-2;Os02g0629200;NA	0	0	0	4032500	0	0	2	2	2	10.1	10.1	10.1	30.498	0.00089928	11.07	12835000	2	1193800	1060000	4261900	3998700	1987400	332910	1426100	132650	117780	473540	444300	220820	36990	0	0	1	0	1	0	By matching	By matching	By MS/MS	By matching	By MS/MS	By matching
Q6K241;A0A0N7KF18	Q6K241;A0A0N7KF18	Os02g0259600 protein;Os02g0259600 protein (Fragment)	Os02g0259600;Os02g0259600	36277000	39108000	35099000	0	0	33696000	2	2	2	15.9	15.9	15.9	23.353	0	17.278	157690000	14	35043000	33856000	34920000	19624000	19842000	14405000	17521000	3893700	3761800	3880000	2180500	2204600	1600600	3	2	3	2	2	2	By MS/MS	By MS/MS	By MS/MS	By MS/MS	By MS/MS	By MS/MS
Q6K271	Q6K271	Flowering time control protein FCA	FCA	0	0	4261000	0	0	0	1	1	1	2.8	2.8	2.8	79.657	0.00082781	7.7739	14857000	1	6005700	4315700	4536100	0	0	0	530620	214490	154130	162000	0	0	0	0	0	1	0	0	0	By matching	By matching	By MS/MS
Q6K2E8;Q7XKQ8	Q6K2E8	Acetolactate synthase 1, chloroplastic	ALS1	22192000	26467000	25674000	24500000	21719000	31498000	8	8	8	15.8	15.8	15.8	69.392	0	55.601	129280000	17	27508000	27636000	33718000	12295000	13782000	14345000	4040100	859620	863630	1053700	384210	430690	448280	2	5	5	1	3	1	By MS/MS	By MS/MS	By MS/MS	By MS/MS	By MS/MS	By MS/MS
Q6K2P3	Q6K2P3	Glucose-6-phosphate 1-epimerase	Os09g0327400	461260000	408580000	381290000	268530000	158010000	258290000	8	8	8	42.3	42.3	42.3	34.674	0	112.64	1735600000	93	468970000	325690000	427370000	255390000	133120000	125070000	115710000	31265000	21713000	28491000	17026000	8874900	8338100	21	18	25	13	8	8	By MS/MS	By MS/MS	By MS/MS	By MS/MS	By MS/MS	By MS/MS
Q6YZF8;Q6K2Z4	Q6YZF8;Q6K2Z4	Os08g0534900 protein;Os02g0305700 protein	Os08g0534900;P0543C11.17-1	0	0	1430800	0	0	0	1	1	1	4	4	4	37.093	0.0029895	6.4788	4368300	1	1598400	1246800	1523100	0	0	0	273020	99903	77922	95196	0	0	0	0	1	0	0	0	0	By matching	By MS/MS	By matching
Q6K3R8	Q6K3R8	T-complex protein 1 subunit gamma	Os02g0247200	0	0	0	0	0	2281200	7	1	1	11.4	1.8	1.8	60.868	0.0057143	6.1137	25683000	3	6164300	5418800	5273800	3800700	4131300	894420	675880	162220	142600	138780	100020	108720	23537	0	0	1	1	1	0	By matching	By matching	By MS/MS	By MS/MS	By MS/MS	By matching
Q6K489	Q6K489	Os09g0248100 protein	Os09g0248100	124460000	125090000	116230000	99289000	93999000	84223000	9	9	9	25.4	25.4	25.4	42.426	0	64.098	616440000	49	114590000	115410000	144760000	87327000	128050000	26293000	34247000	6366100	6411600	8042400	4851500	7114200	1460700	12	10	12	6	8	1	By MS/MS	By MS/MS	By MS/MS	By MS/MS	By MS/MS	By MS/MS
Q6K4K9;A0A0P0XJR1	Q6K4K9;A0A0P0XJR1	Os09g0249700 protein;Os09g0249700 protein (Fragment)	Os09g0249700;Os09g0249700	163810000	187880000	176900000	178870000	241780000	180240000	8	8	8	19.8	19.8	19.8	65.7	0	99.864	1112900000	78	162340000	146220000	170620000	154740000	408240000	70780000	38377000	5597900	5042200	5883500	5336000	14077000	2440700	16	18	17	9	11	7	By MS/MS	By MS/MS	By MS/MS	By MS/MS	By MS/MS	By MS/MS
Q6K4P1;A0A0P0VQQ7	Q6K4P1	Eukaryotic translation initiation factor 3 subunit G	Os02g0788400	9397300	9507900	8929300	0	0	0	3	3	3	11.1	11.1	11.1	32.009	0	17.665	46309000	8	9567100	8467500	9354600	5652500	11013000	2253800	2437300	503530	445660	492350	297500	579650	118620	2	1	1	2	2	0	By MS/MS	By MS/MS	By MS/MS	By MS/MS	By MS/MS	By matching
Q6K4T1	Q6K4T1	60S ribosomal protein L27	Os02g0284600	0	0	0	15566000	16609000	0	3	3	1	20.4	20.4	9.5	15.578	0	19.42	46346000	10	4783300	3006000	0	21140000	14091000	3325300	7724300	797220	501010	0	3523300	2348500	554220	1	1	1	3	3	1	By MS/MS	By MS/MS	By MS/MS	By MS/MS	By MS/MS	By MS/MS
Q6K5F4	Q6K5F4	2 coiled coil domains of eukaryotic origin (31.3 kD)-like protein	OJ1791_B03.50-2	0	0	0	0	0	1489400	1	1	1	4.2	4.2	4.2	36.466	0.0015911	7.1877	10650000	2	2331700	2378600	3597800	1758100	0	583980	760720	166550	169900	256990	125580	0	41713	0	0	1	1	0	0	By matching	By matching	By MS/MS	By MS/MS		By matching
Q6K5G8	Q6K5G8	Glyceraldehyde-3-phosphate dehydrogenase 3, cytosolic	GAPC3	42020000	40092000	46963000	48849000	0	0	14	4	3	49.9	19	16.6	36.567	0	49.878	272080000	20	43989000	38076000	48297000	42375000	92553000	6792400	13604000	2199500	1903800	2414800	2118800	4627600	339620	5	6	4	2	2	1	By MS/MS	By MS/MS	By MS/MS	By MS/MS	By MS/MS	By MS/MS
Q6K5H5	Q6K5H5	Glucose-6-phosphate 1-dehydrogenase	Os02g0600400	0	0	3627700	0	0	0	9	1	1	16.4	2.9	2.9	58.251	0.001554	6.9306	10755000	3	3594300	3298700	3861900	0	0	0	358490	119810	109960	128730	0	0	0	1	1	1	0	0	0	By MS/MS	By MS/MS	By MS/MS	By matching	By matching	By matching
Q7XVZ0;Q6K5R5	Q7XVZ0;Q6K5R5	40S ribosomal protein S27;40S ribosomal protein S27	Os04g0346100;Os02g0478700	0	0	0	0	0	14966000	1	1	1	19.8	19.8	19.8	9.5581	0	28.736	152460000	16	24460000	22157000	22527000	11035000	61991000	10286000	50819000	8153300	7385700	7509100	3678200	20664000	3428600	4	4	4	0	4	0	By MS/MS	By MS/MS	By MS/MS	By matching	By MS/MS	By matching
Q84ZP1;Q6K5R6	Q84ZP1;Q6K5R6	Os07g0208000 protein;Os02g0478600 protein	OJ1559_F09.109;Os02g0478600	28026000	26899000	35897000	41554000	61615000	35278000	5	5	5	40	40	40	14.8	0	31.761	227250000	20	29005000	24145000	42777000	31369000	87381000	12569000	28406000	3625700	3018200	5347100	3921100	10923000	1571100	3	2	4	4	6	1	By MS/MS	By MS/MS	By MS/MS	By MS/MS	By MS/MS	By MS/MS
Q6K5U4	Q6K5U4	Nicotianamine aminotransferase homolog	OsNAAT2	0	0	8109100	0	0	0	2	2	2	5.5	5.5	5.5	47.618	0	16.82	25919000	4	4603500	3689500	8632600	3855500	3702800	1435500	1234300	219210	175690	411080	183590	176320	68358	0	1	1	1	1	0	By MS/MS	By MS/MS	By MS/MS	By MS/MS	By MS/MS	By matching
Q6K5Z3;Q0JBY0	Q6K5Z3;Q0JBY0	Os02g0613600 protein;Os04g0503800 protein (Fragment)	Os02g0613600;Os04g0503800	12239000	13163000	8729600	0	0	0	2	2	2	20	20	20	15.427	0	13.173	39742000	4	11324000	11119000	10033000	0	7265900	0	5677400	1617700	1588400	1433200	0	1038000	0	1	1	2	0	0	0	By MS/MS	By MS/MS	By MS/MS		By matching
Q7XMJ1;Q6K667;A0A0P0X1X5	Q7XMJ1;Q6K667;A0A0P0X1X5	OSJNBb0006N15.8 protein;Os02g0503400 protein	Os04g0376000;Os02g0503400	10842000	7403600	7780500	0	7222800	0	2	2	2	13.8	13.8	13.8	14.224	0.00091324	11.485	45286000	5	10447000	6459600	8607500	8335100	9008900	2428200	9057200	2089400	1291900	1721500	1667000	1801800	485640	2	1	1	0	1	0	By MS/MS	By MS/MS	By MS/MS	By matching	By MS/MS	By matching
Q6K669	Q6K669	Leucine aminopeptidase 2, chloroplastic	Os02g0794700	25034000	27963000	29004000	0	43537000	30451000	7	7	7	18.1	18.1	18.1	61.818	0	44.132	155280000	19	34963000	30749000	38511000	7584500	35413000	8058300	4852500	1092600	960890	1203500	237010	1106600	251820	4	5	6	0	4	0	By MS/MS	By MS/MS	By MS/MS	By matching	By MS/MS	By matching
Q6K6Q1;A0A0N7KFQ4;A0A0P0VLY5	Q6K6Q1;A0A0N7KFQ4;A0A0P0VLY5	Phenylalanine ammonia-lyase;Os02g0626400 protein (Fragment)	Os02g0626400;Os02g0626400	91103000	80631000	84733000	45007000	35163000	39609000	19	15	10	34	26.3	17.1	77.757	0	112.92	351610000	38	100280000	83309000	100380000	27446000	27419000	12777000	8576000	2445900	2031900	2448300	669410	668750	311640	11	9	13	3	2	0	By MS/MS	By MS/MS	By MS/MS	By MS/MS	By MS/MS	By matching
Q6K7A3	Q6K7A3	Os02g0469600 protein	Os02g0469600	0	0	0	0	0	617620	1	1	1	2.4	2.4	2.4	40.591	0.0036603	6.2762	6212400	6	2149200	1527600	2293500	0	0	242160	388280	134320	95472	143350	0	0	15135	2	2	2	0	0	0	By MS/MS	By MS/MS	By MS/MS			By matching
Q6K7P6	Q6K7P6	Os02g0828500 protein	Os02g0828500	0	0	0	0	0	2255800	1	1	1	2.9	2.9	2.9	46.194	0.0050215	6.1429	9768700	2	2371000	1686000	1831300	0	2995900	884490	407030	98790	70251	76305	0	124830	36854	1	0	1	0	0	0	By MS/MS	By matching	By MS/MS		By matching	By matching
Q6K7P8	Q6K7P8	Os02g0828200 protein	Os02g0828200	12776000	12140000	12040000	0	0	0	2	2	2	6	6	6	47.244	0	12.642	42989000	6	12898000	10028000	12762000	1753700	3971900	1575400	1869100	560770	436010	554860	76248	172690	68494	2	2	2	0	0	0	By MS/MS	By MS/MS	By MS/MS	By matching	By matching	By matching
Q6K853	Q6K853	40S ribosomal protein S30	Os02g0804100	0	0	0	0	0	31868000	1	1	1	16.1	16.1	16.1	6.9311	0.0015699	7.0358	64708000	8	6249500	5612100	8820100	10647000	20884000	12495000	21569000	2083200	1870700	2940000	3549100	6961300	4165000	1	1	1	2	2	1	By MS/MS	By MS/MS	By MS/MS	By MS/MS	By MS/MS	By MS/MS
Q6K8J4	Q6K8J4	4-hydroxy-3-methylbut-2-en-1-yl diphosphate synthase (ferredoxin), chloroplastic	ISPG	0	0	0	0	0	4353200	1	1	1	2.6	2.6	2.6	82.16	0.0062674	5.9845	18032000	1	3281600	3126100	1869600	0	8047500	1706900	419340	76316	72699	43479	0	187150	39694	0	0	1	0	0	0	By matching	By matching	By MS/MS		By matching	By matching
Q6K8U8	Q6K8U8	Os02g0785800 protein	Os02g0785800	0	0	0	0	0	7766700	1	1	1	16.1	16.1	16.1	12.715	0.0008489	8.1401	50074000	3	10013000	9677800	11994000	10384000	4329900	3675800	7153400	1430400	1382500	1713400	1483400	618550	525110	1	1	1	0	0	0	By MS/MS	By MS/MS	By MS/MS	By MS/MS	By MS/MS	By matching
Q6K969	Q6K969	Os02g0831800 protein	Os02g0831800	6426200	7322900	0	0	0	0	2	2	2	10.8	10.8	10.8	37.812	0.00091659	11.688	21132000	4	6609900	5931000	2976800	0	4093300	1521500	1408800	440660	395400	198450	0	272890	101430	1	2	1	0	0	0	By MS/MS	By MS/MS	By MS/MS		By matching	By matching
Q6K9C1	Q6K9C1	Protein TAB2 homolog, chloroplastic	Os02g0610800	0	0	0	0	0	1873800	1	1	1	3.8	3.8	3.8	42.69	0.0036873	6.3622	13866000	4	2875100	2193100	2944000	2130700	2988300	734700	630270	130690	99688	133820	96850	135830	33395	1	0	1	1	1	0	By MS/MS	By matching	By MS/MS	By MS/MS	By MS/MS	By matching
Q6KA00	Q6KA00	Os02g0822600 protein	OJ1119_A01.23-1	81313000	72481000	74590000	36806000	91257000	35541000	9	9	9	44.9	44.9	44.9	20.784	0	56.113	368150000	28	55378000	45214000	75333000	48403000	114720000	29101000	33468000	5034300	4110400	6848500	4400300	10429000	2645500	7	5	8	2	5	1	By MS/MS	By MS/MS	By MS/MS	By MS/MS	By MS/MS	By MS/MS
Q6KA61;A0A0P0VHP7	Q6KA61;A0A0P0VHP7	Os02g0285800 protein;Os02g0285800 protein (Fragment)	Os02g0285800;Os02g0285800	21083000	15043000	15973000	0	0	6667000	5	5	5	10.3	10.3	10.3	73.51	0	35.883	68816000	9	15572000	14286000	19533000	11842000	4583900	2999600	2024000	457990	420190	574490	348300	134820	88223	2	2	3	1	1	0	By MS/MS	By MS/MS	By MS/MS	By MS/MS	By MS/MS	By matching
Q6L4F8	Q6L4F8	Guanine nucleotide-binding protein subunit beta-like protein B	RACK1B	0	0	0	0	4755700	0	3	1	1	12.8	7.1	7.1	36.452	0.0029806	6.4629	56934000	1	16007000	17835000	5913000	11007000	6172300	0	2846700	800350	891760	295650	550330	308620	0	1	0	0	0	0	0	By MS/MS	By matching	By matching	By matching	By matching	By matching
Q6L4H5	Q6L4H5	Os05g0549700 protein	P0560C03.1	0	0	0	0	0	359060	3	1	1	6.3	1.7	1.7	57.216	0.0062718	5.9863	19238000	3	4269900	3343200	5417700	2253600	3812800	140780	769520	170800	133730	216710	90145	152510	5631.4	1	0	1	0	1	0	By MS/MS	By matching	By MS/MS	By matching	By MS/MS	By matching
Q6L4R5	Q6L4R5	V-type proton ATPase subunit C	Os05g0593100	57159000	51775000	63484000	99069000	61686000	38296000	10	10	10	39	39	39	42.678	0	79.364	367500000	28	51665000	47698000	56437000	70342000	119610000	21748000	14700000	2066600	1907900	2257500	2813700	4784600	869930	5	6	7	5	4	1	By MS/MS	By MS/MS	By MS/MS	By MS/MS	By MS/MS	By MS/MS
Q6L4S0;A0A0P0WR82	Q6L4S0;A0A0P0WR82	DNA damage-binding protein 1;Os05g0592400 protein (Fragment)	DBB1;Os05g0592400	30224000	33360000	26307000	19681000	0	22814000	6	6	6	7.8	7.8	7.8	121.88	0	40.767	129860000	9	36680000	29458000	26770000	10999000	16539000	9413400	2546300	719210	577600	524910	215670	324290	184580	3	2	1	2	1	0	By MS/MS	By MS/MS	By MS/MS	By MS/MS	By MS/MS	By matching
Q6L4S1	Q6L4S1	ATP-dependent Clp protease proteolytic subunit	Os05g0592100	0	0	0	0	14239000	0	1	1	1	6.2	6.2	6.2	42.748	0.0015444	6.8768	20251000	1	0	0	0	1770200	18481000	0	1125100	0	0	0	98343	1026700	0	0	0	0	0	1	0				By matching	By MS/MS
Q6L4U9;Q5ZBT6	Q6L4U9;Q5ZBT6	Os05g0498400 protein;Os01g0794500 protein	Os05g0498400;Os01g0794500	0	11955000	0	0	0	0	2	2	1	19.1	19.1	11.3	12.693	0	12.624	40820000	6	3907600	9932200	3163400	10358000	9282900	4176100	10205000	976910	2483100	790850	2589500	2320700	1044000	2	2	2	0	0	0	By MS/MS	By MS/MS	By MS/MS	By MS/MS	By matching	By MS/MS
Q6L506;A0A0P0WNB3	Q6L506	Probable monofunctional riboflavin biosynthesis protein RIBA 3, chloroplastic	RIBA3	23931000	28774000	26545000	24986000	23530000	28643000	6	6	6	22.4	22.4	22.4	57.326	0	36.415	139570000	10	28318000	26327000	29795000	24485000	19232000	11412000	5169200	1048800	975060	1103500	906840	712280	422650	4	3	1	1	1	0	By MS/MS	By MS/MS	By MS/MS	By MS/MS	By MS/MS	By matching
Q6L509	Q6L509	Os05g0460000 protein	Os05g0460000	0	32245000	0	17800000	0	9934500	18	3	1	36.5	5.9	1.9	70.834	0	20.421	89757000	5	2855600	23987000	6928200	29217000	24995000	1775000	2425900	77179	648300	187250	789640	675530	47973	1	2	1	0	1	0	By MS/MS	By MS/MS	By MS/MS	By matching	By MS/MS	By matching
Q6L510	Q6L510	60S ribosomal protein L36	Os05g0459900	17074000	18376000	19910000	18573000	0	14226000	2	2	2	15.9	15.9	15.9	12.735	0.00091827	11.699	86823000	11	17259000	15573000	20887000	18206000	9340900	5557500	17365000	3451800	3114500	4177300	3641300	1868200	1111500	2	2	2	3	2	0	By MS/MS	By MS/MS	By MS/MS	By MS/MS	By MS/MS	By matching
Q6PL11;A0A0N7KSW2;Q8H5C3	Q6PL11;A0A0N7KSW2	SKP1-like protein 1;Os11g0456300 protein (Fragment)	SKP1;Os11g0456300	39846000	45954000	42108000	25273000	18149000	30439000	4	4	4	31.8	31.8	31.8	19.042	0	48.359	187020000	29	48699000	43125000	51292000	18236000	17339000	8324000	17001000	4427200	3920400	4662900	1657800	1576300	756730	7	6	8	5	3	0	By MS/MS	By MS/MS	By MS/MS	By MS/MS	By MS/MS	By matching
Q6T5D1	Q6T5D1	Malic enzyme	Os05g0186300	6709900	7291400	6223100	0	0	9066900	4	2	2	11.1	7.4	7.4	62.934	0.00088652	10.88	26247000	2	5710300	5579100	6772600	0	4066800	4118200	846680	184200	179970	218470	0	131190	132850	0	0	2	0	0	0	By matching	By matching	By MS/MS		By matching	By matching
Q6YPF2;A0A0P0XB48;A0A0P0XBB0	Q6YPF2;A0A0P0XB48	Os08g0120500 protein;Os08g0120500 protein (Fragment)	Os08g0120500;Os08g0120500	104630000	117400000	111040000	117230000	94804000	111690000	13	13	13	26.1	26.1	26.1	78.584	0	100.67	632180000	60	109570000	94504000	132710000	87221000	159680000	48496000	15804000	2739200	2362600	3317700	2180500	3992000	1212400	13	15	16	5	9	2	By MS/MS	By MS/MS	By MS/MS	By MS/MS	By MS/MS	By MS/MS
Q6YPG2	Q6YPG2	Acetyltransferase component of pyruvate dehydrogenase complex	OJA1212_C06.23	0	0	0	0	0	5693700	6	1	1	16.1	3.5	3.5	58.997	0.0016181	7.434	36891000	3	7093800	7270800	8464000	6144400	5686100	2232400	1229700	236460	242360	282130	204810	189540	74414	1	1	1	0	0	0	By MS/MS	By MS/MS	By MS/MS	By matching	By matching	By matching
Q6YSB2	Q6YSB2	Glutamate decarboxylase	P0104B02.16-2	12484000	15307000	13734000	0	21122000	16082000	6	3	3	17.1	8.7	8.7	56.196	0	21.323	74293000	4	14334000	11567000	14197000	3601700	22972000	7620800	2476400	477820	385560	473230	120060	765720	254030	1	0	2	0	1	0	By MS/MS	By matching	By MS/MS	By matching	By MS/MS	By matching
Q6YT00;Q0J006	Q6YT00;Q0J006	Proteasome subunit alpha type-7-A;Proteasome subunit alpha type-7-B	Os08g0548900;PAD1	0	7434000	7069900	14231000	0	0	2	2	2	12.9	12.9	12.9	27.296	0	21.66	50995000	5	2527400	7528400	9958800	11672000	17655000	1654100	3642500	180530	537740	711340	833710	1261000	118150	0	1	1	2	1	0	By matching	By MS/MS	By MS/MS	By MS/MS	By MS/MS	By matching
Q6YT73;A0A0P0X354	Q6YT73	Peroxisomal (S)-2-hydroxy-acid oxidase GLO5	GLO5	198490000	159890000	167710000	229480000	230230000	168820000	18	12	12	63.1	39.6	39.6	40.244	0	105.21	1150800000	79	196070000	128870000	176430000	201310000	396750000	51342000	47949000	8169700	5369500	7351300	8387800	16531000	2139200	20	16	17	9	11	6	By MS/MS	By MS/MS	By MS/MS	By MS/MS	By MS/MS	By MS/MS
Q6YTH5	Q6YTH5	Os02g0567800 protein	Os02g0567800	17306000	11561000	16551000	13835000	13467000	13143000	2	2	2	12.5	12.5	12.5	33.744	0	12.315	80928000	5	16704000	9469600	10934000	23035000	16154000	4632100	4760500	982570	557030	643160	1355000	950230	272480	2	1	2	0	0	0	By MS/MS	By MS/MS	By MS/MS	By matching	By matching	By matching
Q6YTT3;A0A0P0XGY2	Q6YTT3;A0A0P0XGY2	Phospho-2-dehydro-3-deoxyheptonate aldolase;Phospho-2-dehydro-3-deoxyheptonate aldolase (Fragment)	Os08g0484500;Os08g0484500	95333000	97241000	113430000	89726000	92824000	75317000	13	13	11	29.3	29.3	23.8	56.434	0	99.381	532890000	41	86667000	77218000	116650000	54904000	159710000	37737000	19737000	3209900	2859900	4320500	2033500	5915300	1397700	10	11	9	3	6	2	By MS/MS	By MS/MS	By MS/MS	By MS/MS	By MS/MS	By MS/MS
Q6YTY2	Q6YTY2	Os07g0608500 protein	Os07g0608500	0	0	0	0	0	1726800	4	1	1	18.5	3.4	3.4	25.999	0.0022796	6.7263	3642100	2	0	0	2965000	0	0	677070	214240	0	0	174410	0	0	39828	1	0	1	0	0	0	By MS/MS	By matching	By MS/MS	By matching	By matching	By matching
Q6YU90	Q6YU90	Os02g0101500 protein	B1370C05.18-1	41771000	47106000	38017000	0	53393000	60829000	5	5	5	23.1	23.1	23.1	42.074	0	31.042	260890000	9	41571000	39376000	49436000	45428000	62524000	22560000	9662700	1539700	1458400	1830900	1682500	2315700	835540	3	2	4	0	0	0	By MS/MS	By MS/MS	By MS/MS	By matching	By matching	By matching
Q6YUA1	Q6YUA1	Os02g0100300 protein	Os02g0100300	57874000	64719000	65517000	61572000	64499000	72634000	7	7	7	22.8	22.8	22.8	44.151	0	59.143	360510000	43	62301000	53607000	76736000	45392000	95640000	26834000	22532000	3893800	3350400	4796000	2837000	5977500	1677100	9	7	13	5	7	2	By MS/MS	By MS/MS	By MS/MS	By MS/MS	By MS/MS	By MS/MS
Q6YUA7	Q6YUA7	Os08g0464000 protein	Os08g0464000	9865200	9557900	12905000	11777000	7350600	0	3	3	3	11.5	11.5	11.5	39.227	0	18.305	54568000	7	5804400	4521600	7046700	20718000	16478000	0	2728400	290220	226080	352340	1035900	823880	0	1	1	2	2	1	0	By MS/MS	By MS/MS	By MS/MS	By MS/MS	By MS/MS
Q6YUK5;Q9FW88;A0A0P0VIE7	Q6YUK5	T-complex protein 1 subunit delta	Os02g0332200	95358000	99902000	94994000	103540000	98255000	91698000	13	13	13	30.7	30.7	30.7	57.747	0	101.1	555070000	69	99320000	88869000	107670000	86748000	138670000	33793000	18502000	3310700	2962300	3589200	2891600	4622300	1126400	15	12	15	11	10	6	By MS/MS	By MS/MS	By MS/MS	By MS/MS	By MS/MS	By MS/MS
Q6YUR8	Q6YUR8	Cold shock domain protein 1	CSP1	77474000	81497000	81809000	85493000	80853000	81135000	4	4	4	26.6	26.6	26.6	22.723	0	39.729	456070000	31	71008000	70271000	88881000	84400000	110590000	30918000	35082000	5462200	5405400	6837000	6492300	8507000	2378300	6	5	6	5	5	4	By MS/MS	By MS/MS	By MS/MS	By MS/MS	By MS/MS	By MS/MS
Q6YUV3	Q6YUV3	Mediator of RNA polymerase II transcription subunit 11	MED11	0	0	0	0	0	2510800	1	1	1	16.5	16.5	16.5	12.991	0.0015711	7.0505	16829000	1	4815600	0	3231300	0	7797800	984460	1869900	535070	0	359030	0	866420	109380	1	0	0	0	0	0	By MS/MS		By matching		By matching	By matching
Q6YUV4	Q6YUV4	Os02g0189000 protein	Os02g0189000	0	0	0	0	0	6432400	2	2	2	13.7	13.7	13.7	16.735	0	13.761	60659000	27	12143000	9146100	20287000	7583300	8978600	2522000	8665600	1734700	1306600	2898100	1083300	1282700	360290	4	3	5	6	6	3	By MS/MS	By MS/MS	By MS/MS	By MS/MS	By MS/MS	By MS/MS
Q6YV23;A0A0P0VNK1;A0A0P0VNP5;A0A0P0VNL4	Q6YV23;A0A0P0VNK1;A0A0P0VNP5;A0A0P0VNL4	Carbamoyl-phosphate synthase small chain, chloroplastic;Os02g0708100 protein	CARA;Os02g0708100	146450000	139050000	164880000	185080000	133270000	128240000	8	8	8	27.4	27.4	27.4	48.435	0	64.671	838360000	63	159330000	136740000	172370000	144980000	161840000	63097000	36450000	6927500	5945000	7494500	6303300	7036600	2743300	11	13	12	9	10	8	By MS/MS	By MS/MS	By MS/MS	By MS/MS	By MS/MS	By MS/MS
Q6YVH3;A0A0P0WY24	Q6YVH3	Os02g0221500 protein	P0758B01.1-1	34836000	32413000	45661000	30716000	30039000	23316000	7	7	7	25.4	25.4	25.4	40.265	0	47.422	191300000	11	36051000	28305000	36764000	17436000	62240000	10503000	14715000	2773100	2177300	2828000	1341300	4787700	807890	2	1	3	1	4	0	By MS/MS	By MS/MS	By MS/MS	By MS/MS	By MS/MS	By matching
Q6YVJ0	Q6YVJ0	9-cis-epoxycarotenoid dioxygenase NCED1, chloroplastic	NCED1	34649000	33271000	33487000	34809000	32439000	33316000	6	6	6	14.1	14.1	14.1	68.619	0	59.756	189020000	22	40272000	30532000	34749000	32753000	39358000	11351000	6750600	1438300	1090400	1241000	1169800	1405600	405390	6	5	7	1	2	1	By MS/MS	By MS/MS	By MS/MS	By MS/MS	By MS/MS	By MS/MS
Q6YVX8	Q6YVX8	Os02g0557600 protein	Os02g0557600	0	0	0	0	0	1938300	1	1	1	3.2	3.2	3.2	66.951	0.0036496	6.2684	18057000	3	3967600	4536500	4244500	2018800	2529800	760000	622660	136810	156430	146360	69613	87235	26207	1	0	1	0	1	0	By MS/MS	By matching	By MS/MS	By matching	By MS/MS	By matching
Q6YW46	Q6YW46	Elongation factor 1-gamma 2	Os02g0220500	66864000	61980000	83770000	31074000	30067000	22347000	11	6	4	35.2	20.1	15.3	47.355	0	48.625	286150000	35	67384000	61240000	80857000	41468000	24373000	10824000	15897000	3743600	3402200	4492000	2303800	1354100	601360	5	9	9	6	5	1	By MS/MS	By MS/MS	By MS/MS	By MS/MS	By MS/MS	By MS/MS
Q6YX79	Q6YX79	GHMP kinase-like protein	Os02g0141300	13110000	16370000	14749000	0	0	0	4	4	4	5.6	5.6	5.6	109.51	0	22.594	51640000	5	7399100	7956200	29012000	2207500	3806500	1259000	1147600	164420	176810	644710	49055	84590	27977	1	2	2	0	0	0	By MS/MS	By MS/MS	By MS/MS	By matching	By matching	By matching
Q6YX88	Q6YX88	Os09g0110400 protein	Os09g0110400	20938000	22259000	24017000	9601000	0	2766100	4	4	4	16.7	16.7	16.7	36.46	0	27.274	81596000	9	21324000	17503000	23898000	9903200	6862600	2105600	5828300	1523100	1250200	1707000	707370	490180	150400	2	3	2	1	1	0	By MS/MS	By MS/MS	By MS/MS	By MS/MS	By MS/MS	By matching
Q6YXW6	Q6YXW6	Sucrose-phosphatase 2	SPP2	145130000	145430000	193500000	99125000	102370000	143870000	10	10	9	26.5	26.5	24.8	47.254	0	77.249	759740000	66	140470000	112700000	167900000	115520000	160510000	62630000	37987000	7023400	5635200	8395100	5776200	8025500	3131500	12	12	14	6	15	7	By MS/MS	By MS/MS	By MS/MS	By MS/MS	By MS/MS	By MS/MS
Q6YXZ7	Q6YXZ7	Protein arginine N-methyltransferase 5	PRMT5	11336000	0	0	0	0	0	2	2	2	5.2	5.2	5.2	72.672	0	13.974	58598000	4	11336000	7981700	10212000	6407000	12176000	10485000	1831200	354240	249430	319140	200220	380510	327640	1	1	1	1	0	0	By MS/MS	By MS/MS	By MS/MS	By MS/MS	By matching	By matching
Q6YY17;Q7XQN5	Q6YY17	Os02g0586400 protein	Os02g0586400	0	0	0	10035000	0	0	3	3	3	18.6	18.6	18.6	23.017	0	19.489	30807000	5	5820900	3907200	5001100	9950800	4465600	1661400	2053800	388060	260480	333410	663390	297710	110760	1	1	1	1	1	0	By MS/MS	By MS/MS	By MS/MS	By MS/MS	By MS/MS	By matching
Q6YY41	Q6YY41	Glycosyltransferase	OSJNBb0046O12.33	95261000	88855000	77637000	58825000	79885000	64088000	6	6	6	23	23	23	46.106	0	56.222	455070000	29	77807000	69335000	63953000	73424000	134470000	36080000	18961000	3242000	2889000	2664700	3059300	5603000	1503400	5	3	7	6	5	3	By MS/MS	By MS/MS	By MS/MS	By MS/MS	By MS/MS	By MS/MS
Q6YY42	Q6YY42	Os02g0589000 protein	Os02g0589000	0	0	0	0	0	5911400	1	1	1	5.5	5.5	5.5	49.017	0.0016155	7.4125	22000000	2	6334100	4880700	4564100	0	3902700	2317800	1047600	301630	232420	217340	0	185840	110370	1	0	1	0	0	0	By MS/MS	By matching	By MS/MS		By matching	By matching
Q6YY64	Q6YY64	60S ribosomal protein L6	Os02g0591700	41146000	45007000	44983000	43321000	95879000	37938000	7	7	4	31.1	31.1	21.5	24.258	0	47.284	304570000	31	67829000	59890000	71727000	35307000	63305000	6507700	27688000	6166300	5444500	6520600	3209700	5755000	591610	7	5	7	4	5	3	By MS/MS	By MS/MS	By MS/MS	By MS/MS	By MS/MS	By MS/MS
Q6YYR2;A0A0P0XDJ9	Q6YYR2;A0A0P0XDJ9	Os08g0234000 protein;Os08g0234000 protein	Os08g0234000;Os08g0234000	0	0	0	0	0	11497000	7	1	1	28.2	3.7	3.7	28.453	0.0062805	5.9877	30724000	1	7012800	9271800	9931400	0	0	4507700	1920200	438300	579490	620710	0	0	281730	0	1	0	0	0	0	By matching	By MS/MS	By matching	By matching	By matching	By MS/MS
Q6YYV0	Q6YYV0	CBS domain containing protein-like	Os09g0115500	16917000	15987000	15477000	0	15948000	13597000	3	3	3	20.3	20.3	20.3	24.167	0	19.121	78325000	10	15429000	10927000	16596000	5347700	24059000	5966400	7120500	1402700	993400	1508700	486160	2187100	542400	3	1	3	1	2	0	By MS/MS	By MS/MS	By MS/MS	By MS/MS	By MS/MS	By matching
Q6YYW3	Q6YYW3	Os08g0562100 protein	Os08g0562100	12307000	12046000	20479000	14274000	19002000	21734000	4	4	4	15.7	15.7	15.7	47.008	0	26.605	86887000	8	14963000	11578000	18889000	8115800	22483000	10857000	3620300	623470	482420	787060	338160	936780	452390	2	0	3	1	2	0	By MS/MS	By matching	By MS/MS	By MS/MS	By MS/MS	By matching
Q6YZE2;A0A0P0XIN6	Q6YZE2	Glutamate-1-semialdehyde 2,1-aminomutase, chloroplastic	GSA	333230000	379020000	382950000	482230000	362440000	349320000	12	12	12	41.2	41.2	41.2	50.237	0	150.2	2156600000	104	321460000	302050000	388440000	491990000	514580000	138110000	102700000	15308000	14383000	18497000	23428000	24504000	6576500	20	17	20	18	18	11	By MS/MS	By MS/MS	By MS/MS	By MS/MS	By MS/MS	By MS/MS
Q6YZI2;Q652P8	Q6YZI2	Os08g0559200 protein	Os08g0559200	26578000	33011000	32421000	28892000	50167000	27111000	3	3	3	32.4	32.4	32.4	12.068	0	22.988	186740000	18	29678000	24972000	39515000	32808000	47305000	12465000	26678000	4239700	3567400	5645000	4686800	6757900	1780700	3	2	5	3	3	2	By MS/MS	By MS/MS	By MS/MS	By MS/MS	By MS/MS	By MS/MS
Q6YZJ0	Q6YZJ0	Os08g0558200 protein	Os08g0558200	0	0	24714000	0	0	0	1	1	1	5	5	5	37.218	0.00085251	8.261	72516000	6	25876000	20330000	26310000	0	0	0	5179700	1848300	1452100	1879300	0	0	0	2	2	2	0	0	0	By MS/MS	By MS/MS	By MS/MS
Q7XHS6;Q6YZQ6	Q7XHS6;Q6YZQ6	Glycosyltransferase;Glycosyltransferase	Os07g0489300;Os07g0489200	0	0	0	0	0	3933300	1	1	1	4.5	4.5	4.5	47.511	0.0022624	6.64	20327000	1	4480400	3152700	2077000	0	9075200	1542200	1069900	235810	165930	109320	0	477640	81169	1	0	0	0	0	0	By MS/MS	By matching	By matching		By matching	By matching
Q6YZW2	Q6YZW2	Os08g0520300 protein	Os08g0520300	0	0	0	0	0	6128900	1	1	1	3.4	3.4	3.4	48.765	0.00087642	10.404	36095000	6	7603900	5680900	7141300	7088000	6177700	2403100	2776500	584920	436990	549330	545230	475200	184850	2	1	1	1	1	0	By MS/MS	By MS/MS	By MS/MS	By MS/MS	By MS/MS	By matching
Q6YZX6	Q6YZX6	Putative aconitate hydratase, cytoplasmic	Os08g0191100	129540000	129050000	135890000	91170000	75399000	93573000	17	15	15	27.7	24.5	24.5	98.082	0	102.25	621260000	41	160630000	116130000	142470000	62980000	110860000	28203000	13806000	3569500	2580600	3166000	1399600	2463500	626730	11	10	11	2	6	1	By MS/MS	By MS/MS	By MS/MS	By MS/MS	By MS/MS	By MS/MS
Q6Z0T7;Q653D9	Q6Z0T7	7,8-dihydroneopterin aldolase	Os08g0556200	52443000	48613000	44421000	29342000	46211000	40554000	5	5	5	55.6	55.6	55.6	14.976	0	58.127	226590000	23	57756000	47348000	30640000	17355000	48816000	24677000	45319000	11551000	9469500	6128000	3471100	9763300	4935500	7	6	4	2	2	2	By MS/MS	By MS/MS	By MS/MS	By MS/MS	By MS/MS	By MS/MS
Q6Z0T9	Q6Z0T9	Os08g0243900 protein	Os08g0243900	0	0	8021200	0	0	0	2	2	2	3.7	3.7	3.7	67.932	0.00089127	10.955	25295000	1	6679300	7297900	8539100	0	0	2778400	1099800	290410	317300	371260	0	0	120800	0	1	0	0	0	0	By MS/MS	By MS/MS	By MS/MS			By matching
Q6Z0Y9;A0A0P0VEE0	Q6Z0Y9;A0A0P0VEE0	Os02g0135800 protein;Os02g0135800 protein (Fragment)	Os02g0135800;Os02g0135800	0	0	0	0	0	978380	2	2	2	7.5	7.5	7.5	33.369	0	12.08	11391000	4	2553200	1931100	3631300	1307200	1584500	383610	813630	182370	137940	259380	93368	113180	27401	1	0	2	0	1	0	By MS/MS	By matching	By MS/MS	By matching	By MS/MS	By matching
Q6Z1G7	Q6Z1G7	Pyruvate dehydrogenase E1 component subunit beta-1, mitochondrial	Os08g0536000	35509000	38042000	28644000	0	56982000	0	3	3	2	10.2	10.2	7.2	39.944	0	24.32	162000000	10	42894000	40352000	47954000	0	29419000	1378600	10800000	2859600	2690100	3197000	0	1961200	91906	3	3	3	0	1	0	By MS/MS	By MS/MS	By MS/MS		By MS/MS	By matching
Q6Z1J6	Q6Z1J6	Obg-like ATPase 1	YCHF1	135820000	152820000	163220000	141780000	131270000	106490000	13	13	13	40.9	40.9	40.9	44.332	0	119.44	796240000	68	160690000	142210000	197740000	93712000	157000000	44884000	31850000	6427600	5688400	7909800	3748500	6279900	1795300	16	15	16	5	8	8	By MS/MS	By MS/MS	By MS/MS	By MS/MS	By MS/MS	By MS/MS
Q6Z1P2	Q6Z1P2	Os08g0566600 protein	Os08g0566600	0	0	0	0	0	10635000	1	1	1	8.8	8.8	8.8	13.201	0.0015267	6.7493	15755000	1	0	0	0	11585000	0	4170000	2625800	0	0	0	1930800	0	694990	0	0	0	1	0	0				By MS/MS		By MS/MS
Q6Z1P3;A0A0P0XIC5	Q6Z1P3;A0A0P0XIC5	Os08g0566400 protein;Os08g0566400 protein (Fragment)	Os08g0566400;Os08g0566400	8175200	8712700	8521200	0	0	0	2	2	2	7.8	7.8	7.8	42.471	0	14.451	28137000	6	8218500	7215100	9054900	0	2779000	869240	1875800	547900	481010	603660	0	185260	57950	2	2	2	0	0	0	By MS/MS	By MS/MS	By MS/MS		By matching	By matching
Q6Z2M5	Q6Z2M5	Small nuclear ribonucleoprotein E	Os02g0126700	0	0	0	0	8418900	0	1	1	1	12.5	12.5	12.5	10.342	0.00083612	7.9453	10927000	1	0	0	0	0	10927000	0	2731700	0	0	0	0	2731700	0	0	0	0	0	1	0					By MS/MS
Q6Z2T6	Q6Z2T6	Geranylgeranyl diphosphate reductase, chloroplastic	CHLP	18508000	19901000	21846000	0	0	20533000	3	3	3	10.2	10.2	10.2	50.586	0	22.595	90568000	7	20676000	17918000	25785000	11024000	9548700	5615200	3483400	795250	689170	991740	424000	367260	215970	2	2	3	0	0	0	By MS/MS	By MS/MS	By MS/MS	By matching	By matching	By matching
Q6Z3F7	Q6Z3F7	Os08g0554000 protein	OJ1125_C01.14-1	0	0	0	0	0	4053500	1	1	1	3.4	3.4	3.4	39.505	0.0008285	7.7769	22331000	2	3449000	3491900	3844800	5026000	4930000	1589300	1175300	181530	183780	202360	264530	259470	83649	1	0	1	0	0	0	By MS/MS	By matching	By MS/MS	By matching	By matching	By matching
Q6Z3F9	Q6Z3F9	Os08g0553800 protein	OJ1125_C01.13-1	0	0	0	0	0	5493200	1	1	1	4.4	4.4	4.4	42.822	0.0056657	6.063	32078000	2	5528000	4689400	5420000	7002600	7283900	2153800	1336600	230330	195390	225830	291780	303500	89742	0	1	1	0	0	0	By matching	By MS/MS	By MS/MS	By matching	By matching	By matching
Q6Z3M0	Q6Z3M0	Glucose-6-phosphate 1-epimerase	Os08g0241600	12865000	11913000	9768100	0	10717000	0	4	4	4	18.7	18.7	18.7	37.395	0	24.202	47534000	5	13230000	11326000	12637000	0	8473400	1867300	2501800	696320	596130	665080	0	445970	98281	2	1	2	0	0	0	By MS/MS	By MS/MS	By MS/MS		By matching	By matching
Q6Z3X5;A0A0N7KP44	Q6Z3X5	Os07g0695800 protein	Os07g0695800	207100000	196410000	188470000	169790000	161510000	176810000	24	15	15	33.5	24.5	24.5	114.29	0	133.94	1039600000	91	199430000	160700000	200270000	149290000	257190000	72726000	22119000	4243100	3419100	4261100	3176400	5472000	1547400	23	18	18	11	12	9	By MS/MS	By MS/MS	By MS/MS	By MS/MS	By MS/MS	By MS/MS
Q6Z3Y3	Q6Z3Y3	Arogenate dehydratase	Os07g0694600	30914000	27594000	28449000	33380000	52104000	39997000	4	4	1	14.8	14.8	4.4	39.892	0	34.18	192870000	21	35719000	29648000	45130000	20647000	44728000	16999000	9643500	1785900	1482400	2256500	1032300	2236400	849940	4	4	5	3	3	2	By MS/MS	By MS/MS	By MS/MS	By MS/MS	By MS/MS	By MS/MS
Q6Z437;Q5Z859	Q6Z437;Q5Z859	Mitogen-activated protein kinase 3;Mitogen-activated protein kinase 4	MPK3;MPK4	0	0	5087200	0	0	0	2	2	2	4.9	4.9	4.9	42.469	0.00089047	10.952	13937000	1	4204600	3156200	5415700	511460	648650	0	774260	233590	175350	300870	28414	36036	0	0	0	1	0	0	0	By matching	By matching	By MS/MS	By matching	By matching
Q6Z4B7	Q6Z4B7	Os07g0510500 protein	Os07g0510500	15513000	14387000	7467800	0	0	0	3	3	2	7.4	7.4	5.8	52.138	0	19.375	63230000	5	14144000	13671000	7205800	16922000	6701300	4586000	3719400	831990	804170	423870	995430	394190	269760	2	2	1	0	0	0	By MS/MS	By MS/MS	By MS/MS	By matching	By matching	By matching
Q6Z4C0	Q6Z4C0	Os07g0510400 protein	Os07g0510400	0	0	0	0	583340	0	2	1	1	4.6	2.9	2.9	51.986	0.0015244	6.7329	5310600	1	1197200	992750	1471200	892360	757100	0	279510	63013	52250	77431	46966	39848	0	0	0	1	0	0	0	By matching	By matching	By MS/MS	By matching	By matching
Q6Z4E4;A0A0P0X3Y0	Q6Z4E4;A0A0P0X3Y0	Methylmalonate semi-aldehyde dehydrogenase;Os07g0188800 protein (Fragment)	Os07g0188800;Os07g0188800	19705000	18371000	20096000	15578000	19198000	18604000	6	6	6	13.7	13.7	13.7	57.246	0	40.089	105400000	13	21100000	13713000	25030000	14473000	24405000	6679100	3764300	753560	489760	893940	516900	871590	238540	3	1	3	1	4	1	By MS/MS	By MS/MS	By MS/MS	By MS/MS	By MS/MS	By MS/MS
Q8H8T0;Q6Z4G3	Q8H8T0;Q6Z4G3	UDP-arabinopyranose mutase 1;UDP-arabinopyranose mutase 3	UAM1;UAM3	0	0	7825600	0	0	0	2	2	2	5.8	5.8	5.8	41.348	0	11.83	25340000	2	6424300	6045900	8330800	0	3602600	936030	1013600	256970	241840	333230	0	144100	37441	0	1	0	0	1	0	By matching	By MS/MS	By matching		By MS/MS	By matching
Q6Z4K6;A0A0P0X3B5;Q2R1M8	Q6Z4K6;A0A0P0X3B5	DEAD-box ATP-dependent RNA helicase 52B;Os07g0202100 protein (Fragment)	PL10B;Os07g0202100	22121000	23604000	22205000	39095000	23930000	41588000	7	7	4	15.8	15.8	9.7	67.171	0	52.841	170850000	24	38394000	30199000	42204000	18902000	32816000	8334500	5511200	1238500	974150	1361400	609730	1058600	268850	6	7	7	1	3	0	By MS/MS	By MS/MS	By MS/MS	By MS/MS	By MS/MS	By MS/MS
Q6Z5N4;Q654V6	Q6Z5N4	Pyruvate dehydrogenase E1 component subunit alpha-1, mitochondrial	Os02g0739600	126580000	140910000	145060000	171700000	212960000	173140000	10	10	10	32.1	32.1	32.1	42.701	0	84.655	915980000	62	128200000	109280000	148780000	162430000	295500000	71790000	41636000	5827100	4967000	6762900	7383400	13432000	3263200	13	12	14	5	8	10	By MS/MS	By MS/MS	By MS/MS	By MS/MS	By MS/MS	By MS/MS
Q6Z695	Q6Z695	Os02g0754700 protein	Os02g0754700	0	0	0	0	0	4944200	1	1	1	2.7	2.7	2.7	55.008	0.0050469	6.17	12882000	2	2822700	3023300	5097400	0	0	1938600	585550	128310	137420	231700	0	0	88117	1	0	1	0	0	0	By MS/MS	By matching	By MS/MS			By matching
Q6Z6A0	Q6Z6A0	Os02g0754300 protein	Os02g0754300	36406000	36823000	55628000	33781000	46654000	28981000	4	4	4	22.4	22.4	22.4	18.332	0	22.647	224500000	9	42355000	36356000	48374000	35655000	48736000	13021000	28062000	5294400	4544500	6046700	4456800	6092000	1627600	1	1	2	2	3	0	By MS/MS	By MS/MS	By MS/MS	By MS/MS	By MS/MS	By MS/MS
Q6Z6A7	Q6Z6A7	Annexin	Os02g0753800	15792000	22719000	25014000	0	0	0	7	6	6	29.6	27.4	27.4	35.554	0	42.348	83258000	8	13115000	13831000	35941000	0	16179000	4192000	4382000	690250	727930	1891600	0	851530	220630	1	2	4	0	1	0	By MS/MS	By MS/MS	By MS/MS		By MS/MS	By matching
Q6Z6E6	Q6Z6E6	Os02g0203700 protein	Os02g0203700	0	0	0	0	0	979440	1	1	1	8.4	8.4	8.4	17.502	0.0015232	6.7329	10448000	2	1984900	1616200	2316000	1921900	2224500	384030	1160800	220540	179580	257340	213550	247170	42670	1	0	1	0	0	0	By MS/MS	By matching	By MS/MS	By matching	By matching	By matching
Q6Z6H0;Q8W0C5;Q6Z6G8	Q6Z6H0;Q8W0C5;Q6Z6G8	4-hydroxy-4-methyl-2-oxoglutarate aldolase;4-hydroxy-4-methyl-2-oxoglutarate aldolase	Os02g0761900;Os01g0722800	5018200	4779100	12676000	2837900	2557400	3300900	2	2	2	10.1	10.1	10.1	18.05	0.00090009	11.096	28999000	3	7169800	5770600	10498000	2014400	2182000	1364500	2899900	716980	577060	1049800	201440	218200	136450	1	0	2	0	0	0	By MS/MS	By matching	By MS/MS	By matching	By matching	By matching
Q6Z6L4;A0A0P0VGI4	Q6Z6L4	Aminopeptidase M1-A	Os02g0218200	209860000	227420000	255410000	180890000	275360000	209830000	24	24	24	36.4	36.4	36.4	98.452	0	201.88	1341500000	112	254080000	223080000	228830000	150490000	415290000	69730000	29163000	5523500	4849500	4974500	3271500	9028200	1515900	25	24	24	10	21	8	By MS/MS	By MS/MS	By MS/MS	By MS/MS	By MS/MS	By MS/MS
Q6Z6S1	Q6Z6S1	Apoptosis inhibitor 5-like protein API5	API5	3635000	3519500	6667500	2146300	0	3138500	3	3	3	6.1	6.1	6.1	59.985	0	16.683	19190000	7	4208400	3257300	5674800	2709000	2197700	1142900	548290	120240	93065	162140	77401	62791	32655	1	1	3	1	1	0	By MS/MS	By MS/MS	By MS/MS	By MS/MS	By MS/MS	By matching
Q6Z6Y1	Q6Z6Y1	Os02g0130100 protein	Os02g0130100	0	0	751850	0	0	0	1	1	1	7.8	7.8	7.8	27.49	0.0036523	6.2699	6330900	1	3099000	2431500	800390	0	0	0	422060	206600	162100	53360	0	0	0	0	1	0	0	0	0	By matching	By MS/MS	By matching
Q6Z744	Q6Z744	Dihydropyrimidine dehydrogenase	Os02g0736400	23042000	27559000	24930000	0	0	20261000	4	4	4	11.4	11.4	11.4	45.308	0	24.159	111380000	7	28584000	19346000	30689000	13818000	13027000	5917800	4455300	1143400	773850	1227600	552710	521090	236710	1	2	2	1	1	0	By MS/MS	By MS/MS	By MS/MS	By MS/MS	By MS/MS	By matching
Q6Z7B0;A0A0P0VDX8;Q6L590;Q6Z058	Q6Z7B0;A0A0P0VDX8	Heat shock 70 kDa protein BIP1;Os02g0115900 protein (Fragment)	BIP1;Os02g0115900	707460000	685260000	737670000	579410000	528870000	477110000	23	23	19	40.5	40.5	35.3	73.389	0	238.17	3503900000	199	740710000	563610000	691720000	623330000	650140000	234350000	116800000	24690000	18787000	23057000	20778000	21671000	7811500	41	41	40	31	30	16	By MS/MS	By MS/MS	By MS/MS	By MS/MS	By MS/MS	By MS/MS
Q6Z7F4	Q6Z7F4	PHD finger protein ALFIN-LIKE 7	Os02g0564100	0	0	0	0	0	9787200	1	1	1	10.1	10.1	10.1	29.229	0	17.719	60097000	5	14537000	11114000	12862000	9338900	8408400	3837500	7512200	1817100	1389200	1607800	1167400	1051000	479680	1	1	1	1	1	0	By MS/MS	By MS/MS	By MS/MS	By MS/MS	By MS/MS	By matching
Q6Z7L1;A0A0P0VQ65;Q10SR3;B9G4B3	Q6Z7L1;A0A0P0VQ65;Q10SR3	Os02g0774300 protein;Os02g0774300 protein (Fragment)	Os02g0774300;Os02g0774300	11991000	13916000	13594000	12892000	12959000	0	6	6	6	13.1	13.1	13.1	72.897	0	37.809	66551000	10	16957000	13955000	17582000	8087700	8989100	981110	1798700	458290	377160	475180	218590	242950	26517	2	2	5	1	0	0	By MS/MS	By MS/MS	By MS/MS	By MS/MS	By matching	By matching
Q6Z869	Q6Z869	Transcription factor NIGT1	NIGT1	0	0	0	0	0	250930000	1	1	1	4.1	4.1	4.1	44.579	0.0016013	7.2698	520300000	3	0	0	0	251680000	170240000	98388000	27384000	0	0	0	13246000	8959900	5178300	0	0	0	0	3	0				By matching	By MS/MS	By matching
Q6Z8F4;C7J1V7	Q6Z8F4	Phosphoribulokinase	Os02g0698000	2747600000	2855500000	2701100000	2577900000	2682800000	2915200000	15	15	15	49.1	49.1	49.1	44.864	0	318.6	16051000000	425	2805200000	2474900000	3004700000	2449000000	4142700000	1174500000	729590000	127510000	112500000	136580000	111320000	188310000	53387000	93	89	82	55	62	44	By MS/MS	By MS/MS	By MS/MS	By MS/MS	By MS/MS	By MS/MS
Q6Z901	Q6Z901	Kinesin light chain-like protein	Os02g0109800	0	0	869850	0	0	0	1	1	1	2.2	2.2	2.2	64.944	0.0056577	6.048	7842200	2	3351000	3565200	926010	0	0	0	261410	111700	118840	30867	0	0	0	1	1	0	0	0	0	By MS/MS	By MS/MS	By matching
Q6Z9G0	Q6Z9G0	Glyceraldehyde-3-phosphate dehydrogenase	Os08g0440800	0	0	0	5008900	0	0	1	1	1	3	3	3	53.369	0.0056417	6.0345	4967000	1	0	0	0	4967000	0	0	198680	0	0	0	198680	0	0	0	0	0	1	0	0				By MS/MS
Q6Z9X3;A0A0P0XFT2;B4XT64	Q6Z9X3	Os08g0407200 protein	P0453D01.16-1	25251000	28046000	21242000	27669000	30735000	32169000	7	7	7	19.2	19.2	19.2	63.496	0	49.427	160690000	11	41088000	21583000	38976000	10129000	41315000	7600400	6427700	1643500	863330	1559000	405150	1652600	304020	3	0	5	1	2	0	By MS/MS	By MS/MS	By MS/MS	By MS/MS	By MS/MS	By matching
Q6ZA50	Q6ZA50	Os07g0172500 protein	Os07g0172500	0	11775000	0	0	13475000	0	2	2	2	27.5	27.5	27.5	14.078	0	14.575	53727000	7	9292000	10206000	10556000	5356100	16828000	1489400	7675200	1327400	1457900	1508000	765160	2403900	212780	1	1	2	1	1	1	By MS/MS	By MS/MS	By MS/MS	By MS/MS	By MS/MS	By MS/MS
Q6ZAA5	Q6ZAA5	D-3-phosphoglycerate dehydrogenase	Os08g0447000	0	0	0	0	16050000	0	4	3	3	7.7	6	6	64.558	0	17.771	59860000	2	9828500	9215000	12289000	2714800	20830000	4982700	1813900	297830	279240	372380	82268	631220	150990	0	0	1	0	1	0	By matching	By matching	By MS/MS	By matching	By MS/MS	By matching
Q6ZBH2	Q6ZBH2	Os08g0545200 protein	Os08g0545200	41711000	44552000	34905000	44586000	42313000	42156000	6	6	6	21.7	21.7	21.7	39.331	0	39.07	220740000	20	49872000	45214000	50122000	25723000	30418000	19396000	11618000	2624800	2379700	2638000	1353800	1601000	1020800	6	7	4	2	1	0	By MS/MS	By MS/MS	By MS/MS	By MS/MS	By MS/MS	By matching
Q6ZBH5;Q64MA9;A3ADI5	Q6ZBH5;Q64MA9	3-hydroxy-3-methylglutaryl coenzyme A synthase;3-hydroxy-3-methylglutaryl coenzyme A synthase	Os08g0544900;Os09g0521400	14810000	16601000	14838000	14057000	15450000	15351000	3	3	3	12.6	12.6	12.6	52.004	0	17.868	85823000	6	15675000	14394000	18643000	11458000	20444000	5209800	4517000	824980	757570	981190	603030	1076000	274200	2	0	2	0	2	0	By MS/MS	By matching	By MS/MS	By matching	By MS/MS	By matching
Q6ZBV1	Q6ZBV1	Os08g0200300 protein	Os08g0200300	0	0	63231000	63715000	51516000	56198000	2	2	2	21.5	21.5	21.5	13.226	0	13.335	264550000	8	19031000	18790000	70014000	60982000	72485000	23245000	52910000	3806300	3758100	14003000	12196000	14497000	4649000	0	0	3	2	2	1	By matching	By matching	By MS/MS	By MS/MS	By MS/MS	By MS/MS
Q6ZBZ2	Q6ZBZ2	Germin-like protein 8-14	GER5	195250000	191770000	133790000	156030000	149730000	159550000	3	3	3	35.7	35.7	35.7	21.861	0	52.039	929740000	37	188910000	145630000	156640000	139610000	237020000	61928000	232440000	47228000	36407000	39160000	34903000	59256000	15482000	9	8	7	5	5	3	By MS/MS	By MS/MS	By MS/MS	By MS/MS	By MS/MS	By MS/MS
Q6ZC56	Q6ZC56	RING-type E3 ubiquitin transferase	Os08g0110500	0	0	0	0	0	2943600	1	1	1	2.9	2.9	2.9	89.419	0.0029674	6.4239	14212000	2	3381000	3611500	6065400	0	0	1154200	338380	80500	85988	144410	0	0	27480	0	1	1	0	0	0	By matching	By MS/MS	By MS/MS			By matching
Q6ZCC0	Q6ZCC0	Os08g0113200 protein	Os08g0113200	0	0	0	1138100	0	0	2	2	2	2.6	2.6	2.6	95.015	0.00092166	11.735	11113000	1	1274000	1103200	1650900	1128500	4878800	1078000	252580	28954	25073	37519	25648	110880	24501	0	0	1	0	0	0	By matching	By matching	By MS/MS	By matching	By MS/MS	By matching
Q6ZCV7	Q6ZCV7	Os08g0487800 protein	Os08g0487800	112510000	105190000	103250000	175780000	125970000	122620000	14	14	5	26.9	26.9	10.4	88.347	0	108.14	702380000	44	115120000	89323000	119800000	180860000	150390000	46887000	15963000	2616400	2030100	2722800	4110400	3418000	1065600	11	7	12	6	8	0	By MS/MS	By MS/MS	By MS/MS	By MS/MS	By MS/MS	By matching
Q6ZD10;Q0J6A9;Q6ZD09	Q6ZD10;Q0J6A9;Q6ZD09	Os08g0342400 protein;Os08g0342400 protein (Fragment);Os08g0342400 protein	OJ1790_D02.29-1;Os08g0342400;NA	148390000	174470000	162740000	137650000	148370000	129000000	24	24	18	33.9	33.9	25.4	99.972	0	237.14	863780000	96	138380000	139620000	177810000	99487000	256330000	52145000	15154000	2427700	2449500	3119500	1745400	4497100	914820	21	21	23	15	14	2	By MS/MS	By MS/MS	By MS/MS	By MS/MS	By MS/MS	By MS/MS
Q6ZD35;A0A0P0XIQ4	Q6ZD35	Os08g0538000 protein	Os08g0538000	119630000	149800000	127580000	143550000	203560000	177400000	13	13	13	23.9	23.9	23.9	77.073	0	102.07	876530000	72	121830000	126650000	145340000	142500000	280580000	59637000	20384000	2833100	2945200	3380000	3314000	6525200	1386900	13	13	15	7	14	10	By MS/MS	By MS/MS	By MS/MS	By MS/MS	By MS/MS	By MS/MS
Q6ZD89;A0A0P0XC87	Q6ZD89;A0A0P0XC87	Flavone 3-O-methyltransferase 1;Os08g0157500 protein (Fragment)	COMT;Os08g0157500	15198000	12312000	13727000	0	57521000	0	3	3	3	17.9	17.9	17.9	39.749	0	67.72	119800000	9	12213000	8761100	12585000	1360800	83293000	1582700	6305000	642790	461110	662380	71621	4383800	83299	2	2	2	0	3	0	By MS/MS	By MS/MS	By MS/MS	By matching	By MS/MS	By matching
Q6ZDP0	Q6ZDP0	Os07g0196200 protein	Os07g0196200	8852500	10063000	9017800	0	0	12381000	2	2	2	13.5	13.5	13.5	25.961	0	12.617	37012000	4	8954400	7813600	9714200	5499000	0	5030400	2467400	596960	520900	647610	366600	0	335360	2	0	2	0	0	0	By MS/MS	By MS/MS	By MS/MS	By matching		By matching
Q6ZDY8;A0A0P0X2D8	Q6ZDY8;A0A0P0X2D8	Succinate dehydrogenase [ubiquinone] flavoprotein subunit, mitochondrial;Os07g0134800 protein (Fragment)	SDH1;Os07g0134800	60455000	52661000	50150000	53672000	44935000	42063000	8	8	8	18.3	18.3	18.3	68.853	0	65.799	303610000	24	57637000	34756000	57193000	33720000	106270000	14043000	10843000	2058500	1241300	2042600	1204300	3795200	501520	4	2	5	4	6	3	By MS/MS	By MS/MS	By MS/MS	By MS/MS	By MS/MS	By MS/MS
Q6ZFE5	Q6ZFE5	Os08g0483200 protein	OJ1111_H02.19-1	18423000	18901000	15337000	0	24896000	22398000	2	2	2	18.6	18.6	18.6	29.132	0	19.72	102650000	7	18473000	15489000	15285000	8768400	36716000	7915700	6415500	1154600	968090	955320	548020	2294800	494730	2	2	1	1	0	1	By MS/MS	By MS/MS	By MS/MS	By MS/MS	By matching	By MS/MS
Q6ZFJ3;Q6ZFJ4;A0A0P0W7F7	Q6ZFJ3;Q6ZFJ4	Ferredoxin--NADP reductase, leaf isozyme 2, chloroplastic;Ferredoxin--NADP reductase, chloroplastic	LFNR2;OJ1435_F07.32-1	31638000	26883000	37384000	25576000	25096000	28549000	8	8	7	26.2	26.2	23	40.664	0	57.37	160130000	23	29252000	19643000	35017000	21032000	40797000	14387000	6962000	1271800	854030	1522500	914420	1773800	625520	6	4	7	1	5	0	By MS/MS	By MS/MS	By MS/MS	By MS/MS	By MS/MS	By MS/MS
Q6ZFT9	Q6ZFT9	Pyrophosphate--fructose 6-phosphate 1-phosphotransferase subunit alpha	PFP-ALPHA	1142400000	1201900000	1125200000	583340000	678080000	834280000	20	20	16	39.9	39.9	32.9	67.098	0	229.51	5448100000	220	1088300000	1021100000	1178400000	505350000	1375700000	279210000	175750000	35108000	32937000	38014000	16302000	44378000	9006600	51	52	51	18	29	19	By MS/MS	By MS/MS	By MS/MS	By MS/MS	By MS/MS	By MS/MS
Q6ZFX8	Q6ZFX8	Os02g0710900 protein	Os02g0710900	29728000	29116000	31581000	32089000	19864000	25917000	9	9	9	12.7	12.7	12.7	99.369	0	61.453	157020000	20	28441000	29896000	34998000	27294000	24203000	12184000	3489300	632030	664370	777740	606540	537850	270760	4	5	6	3	2	0	By MS/MS	By MS/MS	By MS/MS	By MS/MS	By MS/MS	By matching
Q6ZG77;A0A0P0VIL4	Q6ZG77;A0A0P0VIL4	Probable diaminopimelate decarboxylase, chloroplastic;Os02g0440000 protein (Fragment)	LYSA;Os02g0440000	47095000	56714000	49688000	56824000	60057000	64011000	8	8	8	24.7	24.7	24.7	53.214	0	64.9	301660000	36	34597000	43642000	40151000	69910000	82445000	30919000	11602000	1330700	1678500	1544300	2688800	3171000	1189200	6	5	6	8	7	4	By MS/MS	By MS/MS	By MS/MS	By MS/MS	By MS/MS	By MS/MS
Q6ZGC2;A0A0P0VQE5	Q6ZGC2	Os02g0778200 protein	Os02g0778200	32739000	0	30977000	43988000	49349000	43339000	7	7	7	10	10	10	118.36	0	48.292	207200000	14	24555000	10329000	29752000	26604000	98143000	17817000	4604400	545670	229530	661160	591190	2180900	395940	2	1	2	2	5	2	By MS/MS	By MS/MS	By MS/MS	By MS/MS	By MS/MS	By MS/MS
Q6ZGX8	Q6ZGX8	Os02g0690700 protein	Os02g0690700	0	4386400	0	0	0	0	1	1	1	2.3	2.3	2.3	49.27	0.0015432	6.8751	3644100	1	0	3644100	0	0	0	0	151840	0	151840	0	0	0	0	0	1	0	0	0	0		By MS/MS
Q6ZH98	Q6ZH98	Peptidyl-prolyl cis-trans isomerase	Os02g0121300	166680000	167910000	175040000	243160000	223120000	296410000	5	5	5	29.7	29.7	29.7	18.361	0	35.959	1202900000	81	176380000	132010000	198230000	303980000	295730000	96524000	150360000	22048000	16501000	24779000	37997000	36966000	12066000	18	17	19	8	12	7	By MS/MS	By MS/MS	By MS/MS	By MS/MS	By MS/MS	By MS/MS
Q6ZHC0	Q6ZHC0	Os02g0686600 protein	Os02g0686600	8160300	5741800	6402600	3821000	3894800	4066200	3	3	3	10.5	10.5	10.5	39.478	0	17.338	30168000	5	6934400	4654300	8489900	3613200	4823200	1652600	1436600	330210	221630	404280	172060	229680	78695	2	1	1	0	1	0	By MS/MS	By MS/MS	By MS/MS	By matching	By MS/MS	By matching
Q6ZHC3;A0A0P0VEM7;A0A0P0VEI2	Q6ZHC3	Os02g0686400 protein	Os02g0686400	100800000	103640000	100930000	79603000	65444000	86771000	11	11	11	22.8	22.8	22.8	60.862	0	76.022	501120000	55	94411000	93418000	112310000	69687000	100740000	30558000	16165000	3045500	3013500	3622900	2248000	3249800	985750	13	12	11	6	9	4	By MS/MS	By MS/MS	By MS/MS	By MS/MS	By MS/MS	By MS/MS
Q6ZHP6	Q6ZHP6	Os02g0715400 protein	Os02g0715400	2690700	2439100	3894500	0	0	0	2	2	2	30.7	30.7	30.7	10.426	0.00089606	11.05	9996400	2	3074300	2214200	3496800	602000	454790	154310	1666100	512390	369030	582800	100330	75798	25719	0	0	2	0	0	0	By matching	By matching	By MS/MS	By matching	By matching	By matching
Q6ZHS4;A0A0P0VFU1	Q6ZHS4;A0A0P0VFU1	Cinnamyl alcohol dehydrogenase 2;Os02g0187800 protein (Fragment)	CAD2;Os02g0187800	27259000	26407000	20990000	14602000	11762000	11468000	4	4	4	14	14	14	38.643	0	29.48	110120000	13	30502000	23979000	29948000	6398100	17234000	2061700	5506200	1525100	1198900	1497400	319910	861720	103080	3	3	3	2	2	0	By MS/MS	By MS/MS	By MS/MS	By MS/MS	By MS/MS	By matching
Q6ZHZ1;B7F7B9;Q67WN8;A0A0P0VFT3	Q6ZHZ1	Probable sucrose-phosphate synthase 4	SPS4	142520000	138690000	161460000	88562000	144180000	111640000	21	21	18	25.7	25.7	23.3	118.72	0	149.87	764980000	58	136280000	114040000	203230000	47522000	222520000	41380000	15937000	2839200	2375800	4234000	990040	4635900	862080	12	16	14	3	11	2	By MS/MS	By MS/MS	By MS/MS	By MS/MS	By MS/MS	By MS/MS
Q6ZI02	Q6ZI02	Os02g0719600 protein	Os02g0719600	17146000	16493000	18462000	0	20068000	13176000	4	4	4	17.1	17.1	17.1	42.556	0	26.194	82101000	7	19761000	18468000	23346000	2888500	13236000	4400700	4561200	1097900	1026000	1297000	160470	735360	244480	0	1	4	1	1	0	By matching	By MS/MS	By MS/MS	By MS/MS	By MS/MS	By matching
Q6ZI53;A0A0P0VLD7	Q6ZI53;A0A0P0VLD7	Elongation factor Tu;Os02g0595700 protein	OJ1126_D09.31-1;Os02g0595700	1280000000	1226800000	1171300000	1485700000	1153900000	1309500000	19	19	19	50.3	50.3	50.3	50.413	0	323.31	7608000000	364	1380800000	1266400000	1448400000	1481400000	1525100000	505740000	271710000	49315000	45230000	51728000	52908000	54468000	18062000	72	81	71	54	51	35	By MS/MS	By MS/MS	By MS/MS	By MS/MS	By MS/MS	By MS/MS
Q6ZI55	Q6ZI55	NAD-dependent isocitrate dehydrogenase c;2	OsIDHc;2	33730000	39406000	30763000	0	0	34996000	3	3	2	15.1	15.1	9	40.628	0	21.995	145000000	8	37982000	35249000	33495000	6550900	21128000	10594000	8529300	2234200	2073500	1970300	385350	1242800	623190	2	3	1	0	1	1	By MS/MS	By MS/MS	By MS/MS	By matching	By MS/MS	By MS/MS
Q6ZI95;A0A0N7KQ70	Q6ZI95;A0A0N7KQ70	Purple acid phosphatase;Os08g0531000 protein (Fragment)	NPP1;Os08g0531000	0	0	0	0	6175800	0	3	3	3	5.1	5.1	5.1	69.879	0	16.943	21671000	4	2656200	2572600	3837700	3846400	8015300	743080	722370	88539	85752	127920	128210	267180	24769	0	0	0	1	3	0	By MS/MS	By matching	By matching	By MS/MS	By MS/MS	By matching
Q6ZIA3	Q6ZIA3	Uridine kinase	Os08g0530000	23624000	23390000	23302000	33371000	26174000	20462000	4	4	2	10.8	10.8	4.9	54.446	0	28.308	146620000	13	17564000	15108000	18264000	33510000	53339000	8832900	5639100	675530	581080	702460	1288800	2051500	339730	2	2	3	2	3	1	By MS/MS	By MS/MS	By MS/MS	By MS/MS	By MS/MS	By MS/MS
Q6ZIY1	Q6ZIY1	Os07g0205700 protein	Os07g0205700	20841000	17973000	19743000	11530000	8419200	14130000	3	3	3	7.1	7.1	7.1	78.593	0	19.611	83113000	7	22045000	16341000	20647000	9363100	8680800	6037000	2077800	551120	408530	516160	234080	217020	150930	3	2	2	0	0	0	By MS/MS	By MS/MS	By MS/MS	By matching	By matching	By matching
Q6ZJG0	Q6ZJG0	Os08g0542900 protein	Os08g0542900	0	0	0	0	0	4710100	1	1	1	3.3	3.3	3.3	46.648	0.00082237	7.7031	13873000	2	0	0	4050500	4294000	3681700	1846800	730160	0	0	213180	226000	193780	97198	0	0	0	1	1	0			By matching	By MS/MS	By MS/MS	By matching
Q6ZJI3	Q6ZJI3	Os08g0550100 protein	Os08g0550100	26198000	32757000	33473000	48524000	80850000	28309000	11	11	3	28.6	28.6	9.9	55.197	0	81.792	252580000	31	35625000	35007000	39027000	40023000	93884000	9013700	8709600	1228400	1207100	1345800	1380100	3237400	310820	5	7	6	3	8	2	By MS/MS	By MS/MS	By MS/MS	By MS/MS	By MS/MS	By MS/MS
Q6ZJI9	Q6ZJI9	Acyl carrier protein	Os08g0549300	0	0	0	0	0	7770700	1	1	1	10.9	10.9	10.9	14.483	0.0015987	7.2419	30071000	3	10702000	0	0	7733100	8590000	3046800	6014300	2140300	0	0	1546600	1718000	609360	2	0	0	1	0	0	By MS/MS			By MS/MS	By matching	By matching
Q6ZJJ1	Q6ZJJ1	Probable L-ascorbate peroxidase 4, peroxisomal	APX4	0	0	0	0	0	6167500	3	2	2	13.1	8.6	8.6	31.738	0	11.893	27240000	2	5123300	3430100	4742900	2382800	9143300	2418200	1513400	284630	190560	263500	132380	507960	134340	0	0	1	1	0	0	By matching	By matching	By MS/MS	By MS/MS	By matching	By matching
Q6ZKB1	Q6ZKB1	Dihydrolipoamide acetyltransferase component of pyruvate dehydrogenase complex	Os08g0431300	14960000	15975000	15938000	0	0	0	5	4	4	13.5	10.3	10.3	48.832	0	28.998	52900000	4	14213000	13484000	17490000	2453000	5259700	0	2404500	646060	612900	794980	111500	239080	0	0	0	2	1	1	0	By matching	By matching	By MS/MS	By MS/MS	By MS/MS
Q6ZKC0;A0A0P0XG77	Q6ZKC0;A0A0P0XG77	14-3-3-like protein GF14-C;Os08g0430500 protein (Fragment)	GF14C;Os08g0430500	449460000	473000000	429730000	432730000	318960000	311140000	12	9	6	57.8	47.7	30.5	28.826	0	130.47	2321700000	122	430130000	409900000	499710000	430350000	423880000	127720000	136570000	25301000	24112000	29395000	25315000	24934000	7512900	24	26	29	17	16	10	By MS/MS	By MS/MS	By MS/MS	By MS/MS	By MS/MS	By MS/MS
Q6ZKK4;Q6ZKK5	Q6ZKK4;Q6ZKK5	Os08g0206600 protein;Os08g0206600 protein	OJ1119_C05.21-2;OJ1119_C05.21-1	13953000	16206000	10454000	14974000	14189000	12182000	4	4	4	10.2	10.2	10.2	64.65	0	24.71	81316000	6	18418000	14642000	17366000	14379000	13829000	2681500	2710500	613940	488080	578870	479300	460980	89384	2	1	1	1	0	1	By MS/MS	By MS/MS	By MS/MS	By MS/MS	By matching	By MS/MS
Q6ZL37	Q6ZL37	Os07g0575100 protein	OJ1562_B11.122	11688000	10880000	9972100	7886900	9333300	7989200	3	3	3	3.5	3.5	3.5	122.79	0	19.06	55352000	6	11399000	8760300	11623000	7267300	13493000	2807700	1177700	242540	186390	247310	154620	287090	59738	2	2	1	0	1	0	By MS/MS	By MS/MS	By MS/MS	By matching	By MS/MS	By matching
Q6ZL42;Q84NJ4;Q6ZL43;Q2QS71;Q8LLP5;Q2QPG9;A0A0P0WUM7;A0A0P0W2D5;A0A0P0VT87	Q6ZL42;Q84NJ4;Q6ZL43;Q2QS71;Q8LLP5;Q2QPG9	Probable histone H2A.2;Probable histone H2A.3;Probable histone H2A.1	Os07g0545400;Os08g0427700;NA	15922000	13343000	17248000	23319000	23249000	15889000	3	2	2	28.9	22.2	22.2	13.976	0	13.229	105490000	9	13568000	9439200	15711000	25751000	34448000	6575500	15070000	1938300	1348500	2244500	3678800	4921200	939360	2	1	1	2	3	0	By MS/MS	By MS/MS	By MS/MS	By MS/MS	By MS/MS	By matching
Q6ZL61	Q6ZL61	Os07g0182100 protein	Os07g0182100	0	0	0	0	2882500	0	1	1	1	6.4	6.4	6.4	33.915	0.0015723	7.0656	15830000	1	4483800	3705200	3900000	0	3741100	0	1055300	298920	247010	260000	0	249410	0	1	0	0	0	0	0	By MS/MS	By matching	By matching		By matching
Q6ZL81;A0A0P0XIX9	Q6ZL81;A0A0P0XIX9	Os07g0469100 protein;Os09g0250300 protein (Fragment)	Os07g0469100;Os09g0250300	0	0	8198200	3068900	0	0	2	2	2	10.7	10.7	10.7	15.729	0.00088889	10.903	33225000	5	5461800	4386900	7726200	3975800	10054000	1619500	3691600	606870	487430	858470	441760	1117200	179950	0	0	1	1	2	1	By matching	By matching	By MS/MS	By MS/MS	By MS/MS	By MS/MS
Q6ZLB8	Q6ZLB8	Os07g0180900 protein	Os07g0180900	118900000	129750000	132020000	164480000	130130000	132280000	13	13	8	42	42	28.9	44.738	0	104.42	775000000	48	108220000	98199000	136290000	155770000	229910000	46609000	38750000	5410900	4910000	6814600	7788600	11496000	2330400	8	8	9	6	13	4	By MS/MS	By MS/MS	By MS/MS	By MS/MS	By MS/MS	By MS/MS
Q6ZLP6	Q6ZLP6	Os07g0150500 protein	Os07g0150500	5142100	4952600	6026600	0	0	5248800	2	2	2	3.1	3.1	3.1	99.858	0	13.146	32405000	4	4810800	3992900	6618800	272080	14540000	2170400	953100	141490	117440	194670	8002.3	427660	63837	2	1	1	0	0	0	By MS/MS	By MS/MS	By MS/MS	By matching	By matching	By matching
Q6ZLP8;Q7EY39	Q6ZLP8;Q7EY39	40S ribosomal protein S12;40S ribosomal protein S12	Os07g0150200;OSJNBa0016A21.128-1	0	0	4586100	0	0	0	2	1	1	18.8	12.3	12.3	14.799	0.00083682	7.9558	11698000	1	3027100	3788700	4882200	0	0	0	1671100	432440	541240	697460	0	0	0	0	0	1	0	0	0	By matching	By matching	By MS/MS			By matching
Q6ZXK6	Q6ZXK6	Kelch repeat containing protein	kr1	23631000	21649000	23795000	15956000	12111000	14565000	5	5	5	21.7	21.7	21.7	34.425	0	35.371	106030000	17	25266000	7994800	28839000	19678000	17963000	6290300	5301500	1263300	399740	1442000	983910	898130	314510	6	3	5	2	1	0	By MS/MS	By MS/MS	By MS/MS	By MS/MS	By MS/MS	By matching
Q70G58;A0A0P0X9V7	Q70G58	Thioredoxin reductase NTRC	Os07g0657900	176080000	193090000	167600000	147040000	102560000	187050000	11	11	11	31.8	31.8	31.8	56.15	0	102.43	879670000	69	192880000	157880000	173670000	133050000	149520000	72663000	41889000	9184900	7517900	8269900	6335800	7120200	3460100	14	17	18	11	5	4	By MS/MS	By MS/MS	By MS/MS	By MS/MS	By MS/MS	By MS/MS
Q71VM4	Q71VM4	Importin subunit alpha-1a	Os01g0253300	16500000	13576000	11646000	0	0	0	5	4	4	16.5	13.5	13.5	57.57	0	30.204	48918000	8	18163000	14779000	6142100	5362800	4471200	0	1956700	726530	591160	245680	214510	178850	0	3	3	1	0	1	0	By MS/MS	By MS/MS	By MS/MS	By matching	By MS/MS
Q75G91	Q75G91	40S ribosomal protein S3, putative, expressed	LOC_Os03g38000	109770000	122310000	107220000	176080000	186850000	100780000	7	7	4	45.2	45.2	29.8	25.434	0	55.28	766500000	39	114790000	117210000	130730000	80370000	265950000	57452000	47906000	7174200	7325500	8170700	5023100	16622000	3590700	10	7	8	6	7	1	By MS/MS	By MS/MS	By MS/MS	By MS/MS	By MS/MS	By MS/MS
Q75GR6	Q75GR6	50S ribosomal protein L17, putative, expressed	LOC_Os03g60100	10626000	10291000	15553000	16720000	24098000	15228000	2	2	2	7.1	7.1	7.1	22.961	0.00090744	11.307	91196000	10	10496000	8769600	19169000	16825000	30993000	4944600	11400000	1312000	1096200	2396100	2103100	3874100	618070	3	2	3	0	2	0	By MS/MS	By MS/MS	By MS/MS	By matching	By MS/MS	By matching
Q75GS4	Q75GS4	UDP-glucose 6-dehydrogenase 1	UGD1	0	0	0	0	0	122890000	6	1	1	12.3	2.7	2.7	52.296	0.00085179	8.2511	305900000	6	15929000	9527500	24410000	0	207850000	48183000	10548000	549270	328530	841720	0	7167200	1661500	2	0	2	0	1	1	By MS/MS	By MS/MS	By MS/MS	By matching	By MS/MS	By MS/MS
Q75GT3;A0A0P0VYY3	Q75GT3;A0A0P0VYY3	Chaperone protein ClpB2, chloroplastic;Os03g0426900 protein (Fragment)	CLPB2;Os03g0426900	5827800	7304100	4966400	0	0	0	3	2	2	4.3	3.3	3.3	108.98	0	12.441	30100000	4	6078800	5526300	5714100	4881800	6033800	1865700	557420	112570	102340	105820	90404	111740	34550	0	2	0	1	1	0	By matching	By MS/MS	By matching	By MS/MS	By MS/MS	By matching
Q75H96	Q75H96	Os03g0666200 protein	LOC_Os03g46340	14727000	13357000	10181000	19308000	0	0	2	2	2	8	8	8	54.56	0	16.81	92693000	7	14569000	10843000	11795000	18714000	33024000	3747900	3707700	582770	433720	471800	748560	1320900	149920	2	2	1	1	1	0	By MS/MS	By MS/MS	By MS/MS	By MS/MS	By MS/MS	By matching
Q75HE6;A0A0P0W573;A0A0P0W4Q0	Q75HE6;A0A0P0W573;A0A0P0W4Q0	Probable methylenetetrahydrofolate reductase;Os03g0815200 protein (Fragment)	Os03g0815200;Os03g0815200	98537000	90644000	91841000	106040000	86444000	63556000	15	15	15	34.7	34.7	34.7	66.43	0	107.93	497600000	40	108440000	89761000	121230000	78791000	70907000	28470000	13822000	3012200	2493400	3367500	2188700	1969600	790840	12	9	10	6	3	0	By MS/MS	By MS/MS	By MS/MS	By MS/MS	By MS/MS	By matching
Q75HJ0	Q75HJ0	DEAD-box ATP-dependent RNA helicase 37	PL10A	6830300	0	0	0	0	0	6	3	3	12.9	6.8	6.8	67.665	0	20.503	30146000	3	6830300	1894100	2455400	10521000	6441100	2004400	1039500	235530	65315	84670	362790	222110	69116	0	1	0	2	0	0	By matching	By MS/MS	By matching	By MS/MS	By matching	By matching
Q75HJ3	Q75HJ3	Os03g0804800 protein	LOC_Os03g59020	348960000	375310000	385730000	395950000	349970000	397010000	19	19	19	48.2	48.2	48.2	58.783	0	234.68	2146500000	128	397300000	314280000	419370000	349030000	521160000	145400000	63133000	11685000	9243400	12334000	10265000	15328000	4276500	27	26	31	16	20	8	By MS/MS	By MS/MS	By MS/MS	By MS/MS	By MS/MS	By MS/MS
Q75HQ7	Q75HQ7	Phenylalanine ammonia-lyase	Os05g0427400	0	0	3162200	0	0	0	9	1	1	18.3	1.8	1.8	76.698	0.0022523	6.5727	6838400	3	1911500	1560600	3366300	0	0	0	179960	50302	41068	88587	0	0	0	1	1	1	0	0	0	By MS/MS	By MS/MS	By MS/MS	By matching	By matching	By matching
Q75HW4	Q75HW4	Os05g0395000 protein	Os05g0395000	25230000	25450000	22831000	0	35835000	0	3	3	3	6.9	6.9	6.9	66.375	0	25.432	127970000	13	20772000	17182000	18469000	2515400	65598000	3431700	7109400	1154000	954560	1026000	139740	3644400	190650	3	3	3	0	3	1	By MS/MS	By MS/MS	By MS/MS	By matching	By MS/MS	By MS/MS
Q75HX0	Q75HX0	Actin	Os05g0438800	11250000	9148800	13008000	0	12260000	11710000	8	3	3	25.8	10.6	10.6	41.607	0	20.042	62043000	9	10791000	10116000	11618000	8725100	15374000	5419800	2954400	513860	481700	553230	415480	732070	258080	1	2	2	1	2	1	By MS/MS	By MS/MS	By MS/MS	By MS/MS	By MS/MS	By MS/MS
Q75HZ0	Q75HZ0	putative late embryogenesis abundant protein, LEA14-A	Os05g0584200	0	0	0	0	0	14066000	1	1	1	7.3	7.3	7.3	16.546	0.0015373	6.847	58934000	3	6005400	6862400	7119100	13880000	19552000	5515000	9822300	1000900	1143700	1186500	2313400	3258600	919170	0	0	0	1	1	1	By matching	By matching	By matching	By MS/MS	By MS/MS	By MS/MS
Q75I93;Q75I94	Q75I93	Beta-glucosidase 7	BGLU7	57045000	41660000	51761000	53274000	58310000	78989000	11	11	4	29	29	11.3	56.872	0	83.339	320110000	27	78213000	54326000	59844000	36705000	71874000	19143000	11432000	2793300	1940200	2137300	1310900	2566900	683670	8	5	6	1	5	2	By MS/MS	By MS/MS	By MS/MS	By MS/MS	By MS/MS	By MS/MS
Q75IA5	Q75IA5	30S ribosomal protein S13, putative, expressed	OSJNBa0004L11.5	147560000	120790000	131130000	90730000	71949000	88836000	5	5	5	31	31	31	19.222	0	37.561	614750000	33	139820000	119030000	160290000	72530000	95360000	27728000	68306000	15536000	13225000	17810000	8058800	10596000	3080900	5	3	4	7	9	5	By MS/MS	By MS/MS	By MS/MS	By MS/MS	By MS/MS	By MS/MS
Q75IM9	Q75IM9	Isovaleryl-CoA dehydrogenase, mitochondrial	Os05g0125500	26242000	14980000	22388000	18244000	23961000	0	3	3	3	8.6	8.6	8.6	44.531	0	23.473	110660000	11	28348000	18324000	23139000	16791000	21727000	2325600	5532800	1417400	916210	1157000	839570	1086400	116280	3	1	3	1	2	1	By MS/MS	By MS/MS	By MS/MS	By MS/MS	By MS/MS	By MS/MS
Q75IQ9;Q0DKG9;A0A0P0WIL9;A0A0P0VWD8;Q10MV5	Q75IQ9;Q0DKG9;A0A0P0WIL9	putative 6-phosphofructo-2-kinase;Os05g0164100 protein	Os05g0164100;Os05g0164100	130450000	136740000	137480000	164730000	142280000	157950000	15	15	15	28.9	28.9	28.9	84.818	0	160.9	816420000	56	149400000	133740000	168500000	129400000	185320000	50060000	22678000	4149900	3715000	4680500	3594500	5147800	1390600	12	11	12	8	9	4	By MS/MS	By MS/MS	By MS/MS	By MS/MS	By MS/MS	By MS/MS
Q75IR7;A0A0P0UYI0	Q75IR7;A0A0P0UYI0	Os05g0163000 protein;Os01g0158500 protein (Fragment)	Os05g0163000;Os01g0158500	0	0	6330900	0	0	0	2	2	2	3.8	3.8	3.8	68.289	0	11.948	14833000	3	880870	0	6739600	3172700	3118800	920480	412010	24469	0	187210	88131	86634	25569	0	0	1	1	1	0	By matching		By MS/MS	By MS/MS	By MS/MS	By matching
Q75IZ9;A0A0P0X4Y1	Q75IZ9	Glucose-6-phosphate 1-dehydrogenase	LOC_Os03g29950	76057000	75996000	90113000	106540000	110520000	101580000	14	13	8	24.8	23.6	13.7	64.84	0	86.977	546710000	51	78469000	70364000	120140000	73328000	174430000	29971000	17636000	2531300	2269800	3875400	2365400	5626900	966820	11	9	11	5	10	5	By MS/MS	By MS/MS	By MS/MS	By MS/MS	By MS/MS	By MS/MS
Q75J18;Q0IT25	Q75J18;Q0IT25	60S ribosomal protein L13a-2, putative, expressed;Os11g0425800 protein	OSJNBb0081K01.9;Os11g0425800	6004200	0	7365200	0	0	0	2	2	1	8.7	8.7	5.3	23.616	0.0009058	11.266	24273000	4	6238400	1050500	7591400	4370000	4538700	483870	2206600	567120	95504	690130	397280	412610	43989	3	0	1	0	0	0	By MS/MS	By matching	By MS/MS	By matching	By matching	By matching
Q75KD7	Q75KD7	Allene oxide cyclase, chloroplastic	AOC	20020000	0	24383000	0	0	0	4	4	4	17.9	17.9	17.9	26.05	0	30.326	102320000	10	21111000	4043500	24795000	21273000	23943000	7150700	6821100	1407400	269570	1653000	1418200	1596200	476710	3	1	2	1	2	1	By MS/MS	By MS/MS	By MS/MS	By MS/MS	By MS/MS	By MS/MS
Q75L45;Q6Z7D9;Q75LD0;Q5N854;A0A0P0XPP4;Q8H7R2;A0A0P0W282;Q9AWP9;Q75IN0	Q75L45;Q6Z7D9;Q75LD0;Q5N854	Os05g0135800 protein;Os02g0565500 protein;Os03g0844100 protein	Os05g0135800;Os02g0565500;NA	20246000	0	23313000	0	0	19651000	4	4	4	14.1	14.1	14.1	39.31	0	24.978	72425000	6	31808000	12744000	19941000	2963000	0	4967800	3017700	1325400	531020	830870	123460	0	206990	2	1	2	1	0	0	By MS/MS	By MS/MS	By MS/MS	By MS/MS		By matching
Q75LB9	Q75LB9	Os03g0845000 protein	OSJNBa0032G11.22	10198000	19725000	0	11470000	12480000	0	4	4	4	15	15	15	39.624	0	26.078	64744000	6	14527000	13121000	10414000	12580000	14102000	0	3808500	854510	771840	612590	740030	829520	0	1	2	1	1	1	0	By MS/MS	By MS/MS	By MS/MS	By MS/MS	By MS/MS
Q75LC0	Q75LC0	Os03g0844900 protein	OSJNBa0032G11.21	0	0	4261400	0	0	0	1	1	1	2.7	2.7	2.7	36.862	0.0050542	6.1771	4536500	3	0	0	4536500	0	0	0	302430	0	0	302430	0	0	0	1	1	1	0	0	0	By MS/MS	By MS/MS	By MS/MS
Q75LD8	Q75LD8	Os03g0843400 protein	OSJNBa0032G11.6	0	0	22865000	0	0	0	2	2	2	11.9	11.9	11.9	23.309	0	13.328	70297000	8	5821800	4157100	24341000	14850000	18083000	3044000	7810700	646870	461900	2704600	1650000	2009200	338220	2	1	2	2	1	0	By MS/MS	By MS/MS	By MS/MS	By MS/MS	By MS/MS	By MS/MS
Q75LJ4;A0A0P0W559	Q75LJ4;A0A0P0W559	Acyl-CoA-binding domain-containing protein 6;Os03g0835600 protein (Fragment)	ACBP6;Os03g0835600	52869000	68372000	68226000	50645000	32983000	48526000	12	12	12	21.5	21.5	21.5	71.542	0	74.284	293580000	24	63848000	60514000	65112000	43052000	41922000	19133000	7725800	1680200	1592500	1713500	1132900	1103200	503500	6	7	7	2	2	0	By MS/MS	By MS/MS	By MS/MS	By MS/MS	By MS/MS	By matching
Q75LJ7	Q75LJ7	Os03g0836200 protein	LOC_Os03g61990	10616000	10316000	12275000	0	0	0	3	3	3	17.1	17.1	17.1	21.823	0	18.904	44585000	8	8715100	9083000	14434000	8661600	2866300	824810	4053200	792280	825730	1312200	787420	260580	74983	3	2	2	0	1	0	By MS/MS	By MS/MS	By MS/MS	By matching	By MS/MS	By matching
Q75LR2	Q75LR2	Phospho-2-dehydro-3-deoxyheptonate aldolase 1, chloroplastic	DAHPS1	0	0	0	0	2217700	0	6	1	1	12.6	3.2	3.2	60.489	0.001634	7.5652	14136000	3	3686200	3373600	4198400	0	2878300	0	456020	118910	108820	135430	0	92849	0	1	1	1	0	0	0	By MS/MS	By MS/MS	By MS/MS	By matching	By matching	By matching
Q75M08	Q75M08	Protein disulfide isomerase-like 2-1	PDIL2-1	177770000	202560000	154690000	159810000	147380000	165000000	9	5	5	33.6	23.2	23.2	39.912	0	110.23	939550000	62	166280000	187420000	164310000	158120000	197770000	65642000	44740000	7918200	8924600	7824200	7529700	9417800	3125800	14	12	14	8	10	4	By MS/MS	By MS/MS	By MS/MS	By MS/MS	By MS/MS	By MS/MS
Q75M18	Q75M18	Methionine S-methyltransferase	Os05g0105000	136510000	143950000	135660000	134930000	115980000	155050000	17	17	17	20.6	20.6	20.6	120.32	0	119.8	756580000	73	133190000	122830000	139570000	117070000	185520000	58391000	13756000	2421600	2233300	2537700	2128600	3373100	1061600	15	17	16	11	11	3	By MS/MS	By MS/MS	By MS/MS	By MS/MS	By MS/MS	By MS/MS
Q75M28	Q75M28	Os05g0103600 protein	Os05g0103600	0	0	0	0	1752500	0	1	1	1	2.2	2.2	2.2	49.067	0.0056859	6.0845	14350000	1	5912300	4769800	1393700	0	2274500	0	797240	328460	264990	77428	0	126360	0	0	0	0	0	1	0	By matching	By matching	By matching		By MS/MS
Q75M32	Q75M32	Peptidyl-prolyl cis-trans isomerase	Os05g0103200	0	0	0	0	0	403850	1	1	1	3.6	3.6	3.6	26.59	0.0050143	6.1358	7286600	1	1625000	839970	2439800	917690	1305800	158340	455420	101560	52498	152490	57356	81613	9896.4	0	0	1	0	0	0	By matching	By matching	By MS/MS	By matching	By matching	By matching
Q762A6	Q762A6	60S ribosomal protein L22-2, putative, expressed	bip108	21088000	21316000	27940000	34644000	35281000	27244000	3	3	2	24.4	24.4	17.6	14.471	0	18.812	160260000	14	21376000	18370000	30364000	34028000	46043000	10081000	26710000	3562700	3061700	5060700	5671300	7673800	1680200	3	2	3	4	1	1	By MS/MS	By MS/MS	By MS/MS	By MS/MS	By MS/MS	By MS/MS
Q76FS2	Q76FS2	Tubulin beta-8 chain	TUBB8	0	0	0	0	0	7347700	10	1	1	26.9	2.7	2.7	49.633	0.00083264	7.8807	24500000	4	3175300	2259400	3578400	4818300	7787400	2880900	1289500	167120	118920	188340	253590	409860	151630	0	0	1	1	1	1	By matching	By matching	By MS/MS	By MS/MS	By MS/MS	By MS/MS
Q7EXZ4	Q7EXZ4	Beta-glucosidase 28	BGLU28	10946000	11125000	9570200	0	0	0	2	2	2	5.4	5.4	5.4	56.558	0	12.157	36102000	3	10677000	9187100	10545000	1867100	3825800	0	1289400	381330	328110	376590	66683	136640	0	1	0	2	0	0	0	By MS/MS	By matching	By MS/MS	By matching	By matching
Q7EYK9	Q7EYK9	Glucose-6-phosphate 1-dehydrogenase	P0613B07.138	14449000	13616000	10220000	29440000	0	14737000	9	3	3	18.2	7.3	7.3	66.052	0	29.101	75913000	10	17315000	13931000	17579000	14012000	6122700	6954000	2300400	524690	422150	532690	424590	185540	210730	3	2	3	1	1	0	By MS/MS	By MS/MS	By MS/MS	By MS/MS	By MS/MS	By matching
Q7EZB9;A0A0N7KEP4;Q6Z434	Q7EZB9	Os08g0517500 protein	P0700D12.111	18208000	17623000	22161000	0	17556000	13634000	4	4	4	15.1	15.1	15.1	39.925	0	25.5	92869000	9	19139000	15655000	21891000	7465100	23939000	4779900	4221300	869970	711610	995030	339320	1088100	217270	2	2	3	1	1	0	By MS/MS	By MS/MS	By MS/MS	By MS/MS	By MS/MS	By matching
Q7F190;A0A0N7KNH1	Q7F190;A0A0N7KNH1	Malic enzyme;Malic enzyme (Fragment)	OJ1457_D07.117;Os07g0496200	38689000	39404000	42236000	63917000	69726000	51292000	10	10	10	24.9	24.9	24.9	68.942	0	68.181	286400000	21	42333000	53780000	46622000	28488000	94423000	20749000	7955400	1175900	1493900	1295100	791320	2622900	576370	5	6	4	2	4	0	By MS/MS	By MS/MS	By MS/MS	By MS/MS	By MS/MS	By matching
Q7F280;Q65XK3	Q7F280	Isocitrate dehydrogenase [NADP]	Os01g0654500	32855000	28490000	20518000	26752000	31931000	27105000	5	5	5	17.2	17.2	17.2	46.042	0	43.544	159250000	15	37737000	25718000	21794000	22372000	42555000	9071300	6635300	1572400	1071600	908100	932150	1773100	377970	6	3	2	1	1	2	By MS/MS	By MS/MS	By MS/MS	By MS/MS	By MS/MS	By MS/MS
Q7F2G3	Q7F2G3	Carbonic anhydrase	Os01g0639900	6719000000	7520900000	5700800000	7793100000	6514100000	6991600000	10	10	10	43	43	43	29.117	0	109.01	39128000000	436	7663400000	6977700000	7256600000	6028800000	8515000000	2686200000	2794800000	547390000	498410000	518330000	430630000	608220000	191870000	79	87	83	69	70	48	By MS/MS	By MS/MS	By MS/MS	By MS/MS	By MS/MS	By MS/MS
Q7F8R0	Q7F8R0	Zinc finger CCCH domain-containing protein 14	Os02g0194200	16209000	19568000	16922000	13116000	11235000	13632000	3	3	3	14	14	14	31.153	0	21.9	83602000	19	16331000	15672000	18381000	13252000	14644000	5321400	4400100	859540	824860	967420	697490	770740	280070	3	4	5	2	4	1	By MS/MS	By MS/MS	By MS/MS	By MS/MS	By MS/MS	By MS/MS
Q7F8S5;Q69TY4	Q7F8S5	Peroxiredoxin-2E-2, chloroplastic	PRXIIE-2	420640000	473700000	403460000	358730000	433280000	467320000	7	7	7	47.6	47.6	47.6	23.179	0	177.8	2597500000	118	497270000	449800000	511830000	311650000	670980000	156000000	173170000	33151000	29987000	34122000	20777000	44732000	10400000	24	19	21	16	27	11	By MS/MS	By MS/MS	By MS/MS	By MS/MS	By MS/MS	By MS/MS
Q7F9I1;A0A0P0W9M5	Q7F9I1;A0A0P0W9M5	Chaperone protein ClpC1, chloroplastic;Os04g0397100 protein (Fragment)	CLPC1;Os04g0397100	107210000	109320000	110450000	101280000	82409000	89348000	27	10	10	39.8	15.7	15.7	101.8	0	105.62	556990000	51	130270000	104770000	132130000	77561000	80820000	31438000	12109000	2832000	2277500	2872400	1686100	1757000	683440	14	9	14	5	7	2	By MS/MS	By MS/MS	By MS/MS	By MS/MS	By MS/MS	By MS/MS
Q7F9Y6	Q7F9Y6	OSJNBa0086O06.22 protein	Os04g0591000	0	0	0	12746000	0	0	3	3	3	16.8	16.8	16.8	31.672	0	21.875	51738000	6	5841300	5732600	7343200	12639000	17248000	2933400	3233600	365080	358290	458950	789950	1078000	183330	0	1	1	2	2	0	By matching	By MS/MS	By MS/MS	By MS/MS	By MS/MS	By matching
Q7FAH2;A0A0P0WBW9	Q7FAH2;A0A0P0WBW9	Glyceraldehyde-3-phosphate dehydrogenase 2, cytosolic;Os04g0486600 protein (Fragment)	GAPC2;Os04g0486600	1515100000	1531300000	1643200000	2319000000	2597600000	2001600000	15	15	4	53.7	53.7	19.6	36.773	0	268.01	11788000000	318	1499000000	1280000000	1603000000	2521400000	3998500000	885970000	589400000	74950000	64000000	80152000	126070000	199930000	44299000	65	64	55	42	54	38	By MS/MS	By MS/MS	By MS/MS	By MS/MS	By MS/MS	By MS/MS
Q7FAI9	Q7FAI9	OSJNBb0038F03.15 protein	OSJNBb0038F03.15	36711000	38705000	35797000	39099000	45873000	46834000	6	6	6	18.4	18.4	18.4	52.593	0	45.013	221220000	16	36934000	29959000	33532000	35225000	64744000	20827000	8508500	1420500	1152300	1289700	1354800	2490200	801040	2	2	5	2	3	2	By MS/MS	By MS/MS	By MS/MS	By MS/MS	By MS/MS	By MS/MS
Q7FAM9	Q7FAM9	V-type proton ATPase subunit G	Os04g0601700	156800000	123780000	132920000	146360000	224480000	134150000	3	3	3	42.7	42.7	42.7	12.275	0	85.774	886830000	39	192690000	106910000	109270000	152980000	273430000	51542000	177370000	38539000	21383000	21854000	30595000	54687000	10308000	10	8	7	4	6	4	By MS/MS	By MS/MS	By MS/MS	By MS/MS	By MS/MS	By MS/MS
Q7FAT6	Q7FAT6	OSJNBa0010H02.6 protein	Os04g0551800	127540000	106450000	108800000	184740000	119940000	131950000	14	14	14	36.9	36.9	36.9	59.232	0	155.66	717490000	55	132080000	92320000	126710000	148740000	160720000	56926000	23916000	4402500	3077300	4223700	4957900	5357400	1897500	12	8	9	10	12	4	By MS/MS	By MS/MS	By MS/MS	By MS/MS	By MS/MS	By MS/MS
Q7G3Y4	Q7G3Y4	ATP synthase gamma chain	LOC_Os10g17280	23208000	20671000	14828000	0	26468000	0	3	3	3	12.3	12.3	12.3	35.26	0	33.717	114870000	10	20786000	17795000	18448000	5662600	33277000	18905000	6046000	1094000	936600	970940	298030	1751400	995000	4	2	2	0	2	0	By MS/MS	By MS/MS	By MS/MS	By matching	By MS/MS	By matching
Q7GCH3;Q69X47	Q7GCH3;Q69X47	26S proteasome regulatory particle triple-A ATPase subunit6;Os06g0600100 protein	OsRPT6;Os06g0600100	34395000	36652000	51394000	20623000	23721000	19910000	7	6	6	21.9	19.1	19.1	47.222	0	60.995	179780000	16	31563000	30661000	55536000	15426000	38396000	8201400	7191300	1262500	1226400	2221400	617040	1535800	328060	3	4	6	1	2	0	By MS/MS	By MS/MS	By MS/MS	By MS/MS	By MS/MS	By matching
Q7GD79;Q7F7I7;Q69XM7	Q7GD79;Q7F7I7;Q69XM7	GTP-binding nuclear protein Ran-2;GTP-binding nuclear protein Ran-1;GTP-binding nuclear protein Ran-3	RAN2;RAN1;NA	238490000	236600000	277910000	217170000	198450000	236010000	8	8	8	29	29	29	25.038	0	54.504	1343500000	73	210300000	183940000	285590000	209080000	371480000	83084000	111960000	17525000	15328000	23799000	17423000	30956000	6923700	16	14	18	7	13	5	By MS/MS	By MS/MS	By MS/MS	By MS/MS	By MS/MS	By MS/MS
Q7X5X9;A0A0P0WAP9;A0A0P0VZM1	Q7X5X9;A0A0P0WAP9	OSJNBa0027P08.4 protein;Os04g0444600 protein (Fragment)	Os04g0444600;Os04g0444600	51996000	55709000	56049000	52264000	41069000	73809000	8	8	8	29.2	29.2	29.2	47.596	0	57.992	311460000	29	64503000	55416000	71024000	34734000	67890000	17893000	11979000	2480900	2131400	2731700	1335900	2611200	688210	6	6	7	4	5	1	By MS/MS	By MS/MS	By MS/MS	By MS/MS	By MS/MS	By MS/MS
Q7X6J4	Q7X6J4	OSJNBb0038F03.1 protein	Os04g0543200	0	0	5363600	0	0	0	1	1	1	1.8	1.8	1.8	86.648	0.0015613	6.9671	15204000	1	5137300	4357200	5709900	0	0	0	422350	142700	121030	158610	0	0	0	0	0	1	0	0	0	By matching	By matching	By MS/MS
Q7X6X9	Q7X6X9	OSJNBb0070J16.10 protein	Os04g0514800	0	0	0	0	0	0	1	1	1	1.8	1.8	1.8	51.55	0.0069348	5.9601	0	3	0	0	0	0	0	0	0	0	0	0	0	0	0	1	1	1	0	0	0	By MS/MS	By MS/MS	By MS/MS
Q7X720	Q7X720	Phenylalanine ammonia-lyase	Os04g0518100	62827000	56906000	58365000	31936000	31453000	30751000	12	5	5	19.7	7.5	7.5	76.038	0	33.572	278990000	27	57090000	41549000	85892000	29829000	54535000	10098000	6974800	1427200	1038700	2147300	745720	1363400	252450	6	6	7	2	4	2	By MS/MS	By MS/MS	By MS/MS	By MS/MS	By MS/MS	By MS/MS
Q7X7I6;A0A0P0WBK9	Q7X7I6	Glucose-6-phosphate 1-dehydrogenase	Os04g0485300	384650000	362760000	380710000	213060000	316440000	276210000	21	21	8	46.9	46.9	19	57.698	0	172.41	1812800000	111	341140000	292240000	376260000	158970000	514340000	129820000	56649000	10661000	9132700	11758000	4967700	16073000	4056900	27	26	22	7	20	9	By MS/MS	By MS/MS	By MS/MS	By MS/MS	By MS/MS	By MS/MS
Q7X7N2	Q7X7N2	Arginase 1, mitochondrial	ARG1	27302000	23337000	24631000	0	0	27036000	4	4	4	17.1	17.1	17.1	36.944	0	27.388	108930000	6	30599000	22139000	29036000	6701600	13479000	6972200	6808000	1912500	1383700	1814800	418850	842420	435760	2	2	1	0	0	1	By MS/MS	By MS/MS	By MS/MS	By matching	By MS/MS	By MS/MS
Q7X7V6	Q7X7V6	OSJNBa0035M09.5 protein	Os04g0606000	15021000	18145000	21368000	12739000	9219900	9839700	4	4	4	9.9	9.9	9.9	49.811	0	27.229	81202000	10	13609000	12614000	22625000	13164000	14568000	4621700	3248100	544380	504560	904990	526550	582710	184870	2	2	3	2	1	0	By MS/MS	By MS/MS	By MS/MS	By MS/MS	By MS/MS	By matching
Q7X7Y5	Q7X7Y5	OSJNBb0062H02.3 protein	Os04g0321700	18305000	22519000	14861000	10561000	13126000	10624000	4	4	4	10.9	10.9	10.9	56.118	0	25.235	84992000	9	18632000	16787000	22077000	5928300	17174000	4394200	4473300	980630	883540	1161900	312010	903910	231270	2	3	2	0	1	1	By MS/MS	By MS/MS	By MS/MS	By matching	By MS/MS	By MS/MS
Q7X8A1;B7EE22	Q7X8A1	Glyceraldehyde-3-phosphate dehydrogenase	Os04g0459500	2425600000	2931900000	2421800000	2196800000	1942700000	2499100000	13	9	9	37.8	26.9	26.9	42.715	0	164.75	13462000000	272	2429200000	2274000000	2652700000	2401700000	2684400000	1020000000	560910000	101210000	94749000	110530000	100070000	111850000	42500000	44	51	52	47	44	34	By MS/MS	By MS/MS	By MS/MS	By MS/MS	By MS/MS	By MS/MS
Q7X8G7	Q7X8G7	OSJNBb0089K06.1 protein	Os04g0167800	21625000	21607000	17354000	0	23818000	11566000	4	4	4	19	19	19	35.765	0	26.948	98630000	10	15195000	13452000	13149000	3597800	46936000	6300500	6164400	949660	840720	821820	224860	2933500	393780	3	2	2	0	2	1	By MS/MS	By MS/MS	By MS/MS	By matching	By MS/MS	By MS/MS
Q7X8U6	Q7X8U6	OSJNBa0076N16.8 protein	Os04g0490400	0	0	0	0	0	1528700	1	1	1	5.8	5.8	5.8	27.837	0.0008244	7.743	18416000	3	4752200	4090200	4680000	1805400	2489200	599400	1315500	339450	292150	334290	128960	177800	42814	1	1	1	0	0	0	By MS/MS	By MS/MS	By MS/MS	By matching	By matching	By matching
Q7XAL3	Q7XAL3	Acetyltransferase component of pyruvate dehydrogenase complex	P0492E07.128	122030000	130030000	111380000	133340000	113690000	168390000	10	10	5	28.7	28.7	15.7	58.771	0	77.362	700220000	57	132420000	122930000	132480000	105840000	136500000	70049000	24146000	4566100	4239000	4568400	3649800	4706900	2415500	16	16	14	2	4	5	By MS/MS	By MS/MS	By MS/MS	By MS/MS	By MS/MS	By MS/MS
Q7XBW5	Q7XBW5	Probable plastid-lipid-associated protein 3, chloroplastic	PAP3	0	0	5421700	0	17381000	0	2	2	2	7.2	7.2	7.2	40.04	0	12.868	34576000	2	842740	0	6818500	0	21282000	5632500	3143300	76612	0	619860	0	1934800	512050	0	0	1	0	1	0	By matching		By MS/MS		By MS/MS	By matching
Q7XBY6	Q7XBY6	Abscisic acid receptor PYL10	PYL10	0	0	0	0	0	13905000	1	1	1	7.5	7.5	7.5	23.084	0.0008643	8.7233	95723000	10	18386000	18300000	21124000	17261000	15200000	5451900	8702100	1671500	1663600	1920300	1569200	1381800	495630	2	2	2	1	2	1	By MS/MS	By MS/MS	By MS/MS	By MS/MS	By MS/MS	By MS/MS
Q7XC31	Q7XC31	60S ribosomal protein L27	LOC_Os10g41470	0	0	0	0	4755600	0	3	1	1	19.9	8.8	8.8	15.471	0.0016051	7.2972	27147000	5	5504600	6065100	9405700	0	6172100	0	4524600	917430	1010800	1567600	0	1028700	0	1	0	1	1	1	1	By MS/MS	By matching	By MS/MS	By MS/MS	By MS/MS	By MS/MS
[truncated: 270 more rows]

## Sheet: S2 Quantified proteins
Protein IDs	Majority protein IDs	Protein name	Gene name	LFQ intensity Ctrl 1	LFQ intensity Ctrl 2	LFQ intensity Ctrl 3	LFQ intensity OsRIP 1	LFQ intensity OsRIP 2	LFQ intensity OsRIP 3	Peptides	Razor + unique peptides	Unique peptides	Sequence coverage [%]	Unique + razor sequence coverage [%]	Unique sequence coverage [%]	Mol. weight [kDa]	Q-value	Score	Intensity	MS/MS count	Intensity Ctrl 1	Intensity Ctrl 2	Intensity Ctrl 3	Intensity OsRIP 1	Intensity OsRIP 2	Intensity OsRIP 3	iBAQ	iBAQ Ctrl 1	iBAQ Ctrl 2	iBAQ Ctrl 3	iBAQ OsRIP 1	iBAQ OsRIP 2	iBAQ OsRIP 3	MS/MS count Ctrl 1	MS/MS count Ctrl 2	MS/MS count Ctrl 3	MS/MS count OsRIP 1	MS/MS count OsRIP 2	MS/MS count OsRIP 3	Identification type Ctrl 1	Identification type Ctrl 2	Identification type Ctrl 3	Identification type OsRIP 1	Identification type OsRIP 2	Identification type OsRIP 3
[truncated: 950 more rows]

[truncated: 1 more sheets: S3 Volcano plot]
